# Supplementary material for: Discovery of Genes Activated by the Mitochondrial Unfolded Protein Response (mtUPR) and Cognate Promoter Elements
Source: PLoS One. 2007 Sep 12;2(9):e874. doi: 10.1371/journal.pone.0000874 (PMC1964532; doi:10.1371/journal.pone.0000874)
Supplement: Data S1 — A list of mitochondrial, non-mitochonrial and general genes which contain mtUPR promoter elements. (0.12 MB XLS) [file pone.0000874.s002.xls]

## Sheet: All_Genes
Gene/Protein name	Common Name	Description	Gene_position	MURE1-CHOP-TTF1 Offset
AB031045	Q5KU36_HUMAN	Delta-tubulin isoform.	chr17-55292367	-235.3
AB033012	Q6XYB1_HUMAN	LP6347.	chr22+29123030	-508.3
AB040895	Q5HYA7_HUMAN	Hypothetical protein DKFZp686E22130.	chr10-30343389	-831.3
AB046844	Q71SA9_HUMAN	GCDRP.	chr9+131856034	-909.3
AB208816	P20810-2	n/a	chr5+96023532	-738.3
AF068286	Q9P1S5_HUMAN	HDCMD38P.	chr1-203395756	-330.7
AF090930	Q9UI59_HUMAN	PRO0478.	chr17-78073230	-22.3
AF095737	Q9UL10_HUMAN	Hypothetical protein SARDH.	chr9-135580064	-636.3
AF118072	Q9UHU1_HUMAN	PRO1716.	chr11-73572374	-130.3
AF182038	HBP1_HUMAN	HMG box containing protein 1 (HMG-box transcription factor 1) (High mobility group box transcription factor 1).	chr7+106607558	-934.3
AF258551	Q8WY95_HUMAN	PP1597.	chr12-119199946	-929.3
AF258573	Q8WY75_HUMAN	PP4068.	chr2+85437713	-289.3
AF277188	Q9BXV7_HUMAN	PNAS-130.	chr1+141560417	-553.3
AF281255	B2L14_HUMAN	Apoptosis facilitator Bcl-2-like 14 protein (Apoptosis regulator Bcl- G).	chr12+12115668	-881.3
AF336875	Q9BZ61_HUMAN	FKSG62.	chr15-45212178	-652.3
AF370375	Q71RG2_HUMAN	FP2860.	chr12+55844477	-347.3
AF381283	Q5XNR7_HUMAN	Parkin (Fragment).	chr6-161691120	-420.3
AF426265	CU087_HUMAN	Hypothetical protein C21orf87.	chr21-39607756	-144.3
AF463496	Q8IX17_HUMAN	NIK-associated protein.	chr13-38913303	-133.3
AF467442	Q8TEV8_HUMAN	Smith-Magenis syndrome chromosome region candidate 5 protein.	chr17-17620724	-644.3
AF538150	Q9BSH3-2	n/a	chr3-49435383	-249.3
AF539468	F10A4_HUMAN	Protein FAM10A4.	chr13+49644154	-569.3
AJ238398	Q8WWS3_HUMAN	C38h2-l1 protein.	chrX-119643682	-898.3
AJ277796	Q8NHP2_HUMAN	AFARP1 protein.	chr1+113267494	-665.3
AK000055	Q9NXU7_HUMAN	Hypothetical protein FLJ20048.	chr6+25648252	-511.3
AK000483	Q9NX27_HUMAN	Phosphatidylinositol-3 phosphate 3-phosphatase adaptor subunit.	chr5-32265505	-774.3
AK000483	Q9NX27_HUMAN	Phosphatidylinositol-3 phosphate 3-phosphatase adaptor subunit.	chr5-32265505	-603.3
AK022014	Q9HA97_HUMAN	Hypothetical protein FLJ11952.	chr15+84086284	-95.3
AK022217	Q9HA67_HUMAN	Hypothetical protein FLJ12155.	chr19-12674215	-300.3
AK022356	Q9HA39_HUMAN	Hypothetical protein FLJ12294.	chr14-104525732	-173.3
AK023542	Q9H8L3_HUMAN	Hypothetical protein FLJ13480.	chr2-39502036	-726.3
AK023618	Q5TH31_HUMAN	OTTHUMP00000030883.	chr20-34714644	-813.3
AK025441	Q9H8E3_HUMAN	Hypothetical protein FLJ13715.	chr5-145473666	-877.3
AK025441	Q9H8E3_HUMAN	Hypothetical protein FLJ13715.	chr5-145473666	-558.3
AK026597	Q5TA05_HUMAN	Hypothetical protein FLJ22944.	chr10-105953178	-898.3
AK027875	Q5SZG1_HUMAN	Prune homolog (Drosophila) (Fragment).	chr1+149263841	-337.3
AK056031	Q96N33_HUMAN	Hypothetical protein FLJ31469.	chr18+53457684	-207.3
AK058196	Q96LI1_HUMAN	Hypothetical protein FLJ25467.	chr3-42763289	-783.3
AK074256	Q9NVJ3_HUMAN	Hypothetical protein FLJ10701.	chr12-122345031	-291.3
AK091307	Q6UXP2_HUMAN	KTIS8219.	chr13+27752617	-811.3
AK091772	Q8NB01_HUMAN	Hypothetical protein FLJ34453.	chr3+33130534	-986.3
AK091839	Q9BXY5-3	Calcyphosine-2.	chr12-73956026	-836.3
AK092426	Q8NAM5_HUMAN	Hypothetical protein FLJ35107.	chr3+13953901	-547.3
AK093196	Q8NA37_HUMAN	Hypothetical protein FLJ35877.	chr22+29490239	-697.3
AK093659	Q8N214_HUMAN	Hypothetical protein FLJ36340.	chr1-39760544	-761.3
AK094461	Q8N5K5_HUMAN	MGC40042 protein.	chr22+40484404	-437.3
AK094772	Q8N9F6_HUMAN	Hypothetical protein FLJ37453.	chr1-16033146	-727.3
AK095598	Q8N973_HUMAN	CDNA FLJ38279 fis, clone FCBBF3005444.	chr12-31429907	-551.3
AK096009	Q8N8Z0_HUMAN	Hypothetical protein FLJ38690.	chr12-119892023	-133.3
AK096781	Q8N8H9_HUMAN	Hypothetical protein FLJ39462.	chr6+10767742	-786.3
AK097425	Q8N828_HUMAN	Hypothetical protein FLJ40106.	chr12+110637692	-934.3
AK097637	Q8N7V0_HUMAN	Hypothetical protein FLJ40318.	chr22-40096380	-642.3
AK098041	Q8N1I1_HUMAN	Hypothetical protein FLJ40722.	chr7+143138015	-371.3
AK098050	Q75MU6_HUMAN	Hypothetical protein DOCK4 (Fragment).	chr7-111154038	-637.3
AK098270	Q8N7K5_HUMAN	Hypothetical protein FLJ40951.	chr7+101605197	-338.3
AK098414	Q8N7H9_HUMAN	Hypothetical protein FLJ25548.	chr3+43356969	-748.3
AK098633	Q4G114_HUMAN	HORMAD1 protein.	chr1-148937314	-374.3
AK123617	Q6ZW43_HUMAN	Hypothetical protein FLJ41623.	chr2+113679973	-386.3
AK124030	Q6ZVV4_HUMAN	Hypothetical protein FLJ42036.	chr3+50080125	-951.3
AK124030	Q6ZVV4_HUMAN	Hypothetical protein FLJ42036.	chr3+50080125	-592.3
AK124125	Q6ZVT0_HUMAN	Hypothetical protein FLJ42131.	chr1+1099148	-992.3
AK124361	Q6ZVM2_HUMAN	Hypothetical protein FLJ42370.	chr17+74350876	-692.3
AK124574	Q6ZVH2_HUMAN	Hypothetical protein FLJ42583.	chr12+8381401	-684.3
AK125515	Q6ZUN1_HUMAN	Hypothetical protein FLJ43527.	chr15-40482643	-114.3
AK125767	Q6ZUE5_HUMAN	Hypothetical protein FLJ43779.	chr2-228189957	-846.3
AK126509	Q6ZTL2_HUMAN	Hypothetical protein FLJ44545.	chr17-7189376	-488.3
AK126613	Q6ZTH5_HUMAN	Hypothetical protein FLJ44650.	chr7+97644621	-617.3
AK126633	Q6ZTG7_HUMAN	Hypothetical protein FLJ44675.	chr15-66650218	-741.3
AK126724	Q6ZTD3_HUMAN	Hypothetical protein FLJ44770.	chr2+42691286	-633.3
AK126736	Q6ZTC9_HUMAN	Hypothetical protein FLJ44782.	chr3+120689579	-546.3
AK127266	Q6ZSP2_HUMAN	Hypothetical protein FLJ45333.	chr16-79762320	-757.3
AK127293	Q6ZSM7_HUMAN	Hypothetical protein FLJ45360.	chr3+196960854	-542.3
AK127423	Q6ZSH8_HUMAN	Hypothetical protein FLJ45515.	chr17+19163538	-525.3
AK128800	Q6ZQS0_HUMAN	Hypothetical protein FLJ45691.	chr20-44810988	-287.3
AK131240	Q6ZNF3_HUMAN	Hypothetical protein FLJ16156.	chr7-63622389	-944.3
AK131343	Q6ZN76_HUMAN	Hypothetical protein FLJ16361.	chr5-177585702	-846
AK131382	Q6ZN42_HUMAN	Hypothetical protein FLJ16455.	chr6+30635459	-417.3
AL136792	Q9H0H7_HUMAN	Hypothetical protein DKFZp434P1219.	chr7+2565297	-980.3
AL136899	Q4G104_HUMAN	FBXO21 protein.	chr12-116067255	-684.3
AL136901	Q9H085_HUMAN	Hypothetical protein DKFZp434P078 (Novel protein).	chr10-105942241	-933.3
AL832016	Q86TC6_HUMAN	Hypothetical protein DKFZp451F074 (Fragment).	chr8+17453754	-360.7
AY151139	Q7Z5D8_HUMAN	Homeobox C14 protein.	chr12+7809078	-830.3
AY189281	Q6Y2L1_HUMAN	LP4791 protein.	chr11-124128308	-276.3
AY194294	Q86YL3_HUMAN	INM04.	chr1+165904658	-603.3
AY203938	Q6XYD2_HUMAN	LP3236.	chr7+65180287	-227.3
AY336979	Q69G40_HUMAN	Transcription factor GTF2IRD2 isoform 2.	chr7+74146322	-380.3
AY354539	Q3B891_HUMAN	Hypothetical protein (Fragment).	chr17-38496645	-744.3
AY358191	Q6UXV6_HUMAN	NINP6167.	chr19-45471236	-994.3
AY358230	Q6UXS1_HUMAN	LSPQ2494.	chr1-32606233	-59.3
AY358248	Q6UXQ5_HUMAN	MRSS6228.	chr11-95627650	-26.3
AY358789	Q6UWH1_HUMAN	TSSP3028.	chr4+78125015	-922.3
AY493416	SYEP_HUMAN	Bifunctional aminoacyl-tRNA synthetase [Includes: Glutamyl-tRNA synthetase (EC 6.1.1.17) (Glutamate--tRNA ligase); Prolyl-tRNA synthetase (EC 6.1.1.15) (Proline--tRNA ligase)].	chr1-218208642	-297.3
AY597813	Q6PL43_HUMAN	Hypothetical protein.	chr3-195790548	-483.3
AY831680	Q49KD3_HUMAN	HC1.	chr3-109232539	-118.3
AY841899	Q3T551_HUMAN	CAPON short form.	chr1+160599396	-622.3
BC000121	Q9BWM9_HUMAN	MGC3130 protein.	chr17+39574915	-845.3
BC000121	Q9BWM9_HUMAN	MGC3130 protein.	chr17+39574915	-428.3
BC001407	Q9BV83_HUMAN	SLC25A16 protein.	chr10-69955226	-680.3
BC001602	O15519-4	n/a	chr2+201689327	-391.3
BC005934	Q5TEZ7_HUMAN	Novel protein.	chr1-115117639	-418.3
BC006177	Q9BRL8_HUMAN	MTA1 protein.	chr14+105000578	-418.3
BC008373	Q96HL9_HUMAN	CHP protein.	chr15+39358936	-326.3
BC009249	Q96GT1_HUMAN	KPTN protein.	chr19-52670219	-633.3
BC009273	Q6LBL5_HUMAN	GM2 activator protein.	chr5+150612941	-697.3
BC011243	Q96JB9_HUMAN	Ubiquitin UBF-fl.	chr19+63071064	-938
BC011515	Q96F92_HUMAN	TAZ protein (Tafazzin) (Cardiomyopathy, dilated 3A (X-linked); endocardial fibroelastosis 2; Barth syndrome).	chrX+153293292	-974.3
BC012009	P52564-2	n/a	chr17+64922522	-621.3
BC012758	Q5TA31_HUMAN	Novel protein.	chr1+226741716	-973.3
BC014484	Q96CA0_HUMAN	TOR1A protein.	chr9-131623475	-897.3
BC016825	Q96AS4_HUMAN	SPIRE1 protein.	chr18-12438630	-776.3
BC020238	Q96K97_HUMAN	Hypothetical protein FLJ14416.	chr17-71547269	-907.3
BC022067	EXOS1_HUMAN	3'-5' exoribonuclease CSL4 homolog (EC 3.1.13.-) (Exosome component 1).	chr10-99185990	-833.3
BC022566	Q96JX9_HUMAN	Hypothetical protein FLJ14906 (C13orf6 protein).	chr13+107668850	-895.3
BC028573	CLK1_HUMAN	Dual specificity protein kinase CLK1 (EC 2.7.1.37) (EC 2.7.1.112) (CDC-like kinase 1).	chr2-201426050	-993.3
BC029811	Q8N6L0_HUMAN	FLJ32658 protein.	chr19+54583367	-468.3
BC030568	Q6PIR5_HUMAN	Hypothetical protein.	chr1+199755722	-156.3
BC032307	Q8N5J8_HUMAN	FLJ14640 protein.	chr19-38113974	-859.3
BC032525	Q8N5C9_HUMAN	SLC30A6 protein.	chr2+32276330	-788.3
BC033616	Q5VWW2_HUMAN	Fer-1-like 3, myoferlin (C. elegans).	chr10-95146932	-993.3
BC033642	ZN180_HUMAN	Zinc finger protein 180 (HHZ168).	chr19-49672342	-691.3
BC035808	K1543_HUMAN	Protein KIAA1543.	chr19+7566787	-774.3
BC036049	Q4G0X5_HUMAN	C6orf157 protein.	chr6-83802481	-919.3
BC036647	Q5TA04_HUMAN	Novel protein.	chr10-105917333	-876.3
BC037785	Q49AI0_HUMAN	FGFR1OP protein.	chr6+167354752	-456.3
BC039728	Q5VW38-2	n/a	chr9+131855805	-680.3
BC041465	Q5U5P9_HUMAN	Hypothetical protein.	chr6+31278125	-557.3
BC042469	Q5JVP7_HUMAN	Novel protein.	chrX+135549564	-614.3
BC043150	Q4G0P7_HUMAN	IQCE protein.	chr7+2565216	-899.3
BC044938	Q86ST0_HUMAN	FBXL21 protein.	chr5+135293990	-487.3
BC046415	Q86Y87_HUMAN	Hypothetical protein.	chr19+23889551	-419.3
BC047469	Q8NHH3_HUMAN	Hypothetical protein (Novel protein).	chr1-211232423	-324.3
BC047706	Q86WX4_HUMAN	GTF2IRD2 protein (Transcription factor GTF2IRD2 isoform 1).	chr7-73871301	-387.3
BC049374	CJ055_HUMAN	Hypothetical protein C10orf55.	chr10-75340032	-667.3
BC050375	Q9NZI2-3	n/a	chr5+169863850	-965.3
BC057393	Q6PFW3_HUMAN	MTMR12 protein.	chr5-32262871	-805.3
BC057393	Q6PFW3_HUMAN	MTMR12 protein.	chr5-32262871	-634.3
BC057845	Q4G0J6_HUMAN	C6orf157 protein.	chr6-83658835	-888.3
BC060758	Q6P9H7_HUMAN	PPARBP protein.	chr17-34814068	-414.3
BC061590	Q6P7N8_HUMAN	Hypothetical protein (Transcription factor GTF2IRD2 isoform 3).	chr7+74146329	-387.3
BC062602	Q9H307-2	n/a	chr14+38714226	-624.3
BC062779	Q6P5P9_HUMAN	ABCA3 protein.	chr16-2313346	-731.3
BC063489	Q8WZ28_HUMAN	Hypothetical protein.	chr17+39619905	-781.7
BC065270	APOC2_HUMAN	Apolipoprotein C-II precursor (Apo-CII) (ApoC-II).	chr19+50143381	-306.3
BC065270	APOC2_HUMAN	Apolipoprotein C-II precursor (Apo-CII) (ApoC-II).	chr19+50143381	-139.3
BC066301	Q6NZ63_HUMAN	MGC87042 protein.	chr7-22425590	-608
BC066878	Q8TDT1_HUMAN	Putative G-protein coupled receptor.	chr19+55953447	-335.3
BC067080	Q5VXA6_HUMAN	Novel protein.	chr1+159962325	-360.3
BC080180	GMFG_HUMAN	Glia maturation factor gamma (GMF-gamma).	chr19-44510839	-998.3
BC092498	Q569G0_HUMAN	DACT2 protein.	chr6-168436358	-533.3
BC098416	Q8NC25_HUMAN	Hypothetical protein FLJ90582.	chr19+11569263	-330.3
BC098583	Q4KMG0_HUMAN	CDON protein.	chr11-125334528	-981.3
BC103943	ZN624_HUMAN	Zinc finger protein 624.	chr17-16465037	-730.3
BC104963	Q6ZTV6_HUMAN	Hypothetical protein FLJ44186.	chr7-138788844	-696.3
BC106914	Q3KP45_HUMAN	FLJ11795 protein.	chr5-55431465	-610.3
BC107725	Q3B7A0_HUMAN	Hypothetical protein.	chr1-244555740	-489.3
BC108686	Q5QP82_HUMAN	WD repeat domain 32 (Fragment).	chr9+37790813	-499.3
BC108721	CA077_HUMAN	Protein C1orf77.	chr1+151875674	-843
BC108906	ZO3_HUMAN	Tight junction protein ZO-3 (Zonula occludens 3 protein) (Zona occludens 3 protein) (Tight junction protein 3).	chr19+3679373	-226.3
BT019947	Q9UE37_HUMAN	Glutathione transferase (EC 2.5.1.18) (Fragment).	chr1+110000534	-972.3
BX537636	Q6ZW09_HUMAN	Hypothetical protein FLJ41819.	chr21+33650878	-777.3
BX537857	Q7Z667_HUMAN	Hypothetical protein DKFZp779F1164.	chrX-15209758	-958.3
BX538248	Q7Z4Q0_HUMAN	Hypothetical protein.	chr2-208394258	-279.3
BX647724	Q9NRR4-2	n/a	chr5-31437016	-985.3
BX648359	Q6ZS86_HUMAN	CDNA FLJ45739 fis, clone KIDNE2010049, weakly similar to Glycerol kinase 2 (EC 2.7.1.30).	chr3-143366221	-277.3
BX648681	Q8N2A7_HUMAN	Hypothetical protein FLJ33582.	chr3-143365443	-315.3
BX648919	FAM9C_HUMAN	Protein FAM9C.	chrX-12963657	-826.3
CR456446	TMPS6_HUMAN	Transmembrane protease, serine 6 (EC 3.4.21.-) (Matriptase-2).	chr22-35791911	-688.3
CR599373	AP1S1_HUMAN	Adapter-related protein complex 1 sigma 1A subunit (Sigma-adaptin 1A) (Adaptor protein complex AP-1 sigma-1A subunit) (Golgi adaptor HA1/AP1 adaptin sigma-1A subunit) (Clathrin assembly protein complex 1 sigma- 1A small chain) (Clathrin coat assembly protein AP19) (HA1 19 kDa subunit) (Sigma 1a subunit of AP-1 clathrin).	chr7+100586593	-451.3
CR606706	Q6I9R6_HUMAN	Glucocerebrosidase.	chr1-153450278	-340.3
CR936771	Q68DZ4_HUMAN	Hypothetical protein DKFZp686A0768.	chr1-115113629	-397.3
D84295	Q5CZA6_HUMAN	Hypothetical protein DKFZp686M0150 (Fragment).	chr21+37379959	-887.3
D89980	ACTN4_HUMAN	Alpha-actinin 4 (Non-muscle alpha-actinin 4) (F-actin cross linking protein).	chr19+43830233	-979.3
D89980	ACTN4_HUMAN	Alpha-actinin 4 (Non-muscle alpha-actinin 4) (F-actin cross linking protein).	chr19+43830233	-673.3
DQ063579	Q2Y0W8_HUMAN	Na+-driven Cl-HCO3 exchanger.	chr12+50104871	-875.3
DQ256726	Q2XSU4_HUMAN	RNA binding motif and ELMO domain 1.	chr2+85437824	-400.3
NM_000073	CD3G_HUMAN	T-cell surface glycoprotein CD3 gamma chain precursor (T-cell receptor T3 gamma chain).	chr11+117720310	-585.3
NM_000080	ACHE_HUMAN	Acetylcholine receptor protein, epsilon subunit precursor.	chr17-4741839	-891.3
NM_000113	TOR1A_HUMAN	Torsin A precursor (Torsin family 1 member A) (Dystonia 1 protein).	chr9-131615042	-839.3
NM_000116	TAZ_HUMAN	(Alt Name NM_181312) Tafazzin (Cardiomyopathy, dilated 3A (X-linked); endocardial fibroelastosis 2; Barth syndrome).	chrX+153293070	-752.3
NM_000159	GCDH_HUMAN	Glutaryl-CoA dehydrogenase, mitochondrial precursor (EC 1.3.99.7) (GCD).	chr19+12862973	-859.3
NM_000211	ITB2_HUMAN	Integrin beta-2 precursor (Cell surface adhesion glycoproteins LFA- 1/CR3/p150,95 beta-subunit) (CD18) (Complement receptor C3 beta- subunit).	chr21-45130313	-940.3
NM_000239	LYSC_HUMAN	Lysozyme C precursor (EC 3.2.1.17) (1,4-beta-N-acetylmuramidase C).	chr12+68028430	-719.3
NM_000405	SAP3_HUMAN	Ganglioside GM2 activator precursor (GM2-AP) (Cerebroside sulfate activator protein) (Shingolipid activator protein 3) (SAP-3) [Contains: Ganglioside GM2 activator isoform short].	chr5+150612836	-592.3
NM_000430	LIS1_HUMAN	Platelet-activating factor acetylhydrolase IB alpha subunit (PAF acetylhydrolase 45 kDa subunit) (PAF-AH 45 kDa subunit) (PAF-AH alpha) (PAFAH alpha) (Lissencephaly-1 protein) (LIS-1).	chr17+2443685	-922.3
NM_000536	RAG2_HUMAN	V(D)J recombination-activating protein 2 (RAG-2).	chr11-36570070	-865.3
NM_000590	IL9_HUMAN	Interleukin-9 precursor (IL-9) (T-cell growth factor P40) (P40 cytokine).	chr5-135255833	-904.3
NM_000607	A1AG1_HUMAN	Alpha-1-acid glycoprotein 1 precursor (AGP 1) (Orosomucoid-1) (OMD 1).	chr9+116125156	-912.3
NM_000664	Q6KEV6_HUMAN	Acetyl-CoA carboxylase-alpha (EC 6.4.1.2) (Fragment).	chr17-32516040	-905.3
NM_000749	ACHB3_HUMAN	Neuronal acetylcholine receptor protein, beta-3 subunit precursor.	chr8+42671718	-430.3
NM_000850	GSTM4_HUMAN	Glutathione S-transferase Mu 4 (EC 2.5.1.18) (GSTM4-4) (GST class-mu 4) (GTS-Mu2).	chr1+110000225	-663.3
NM_000924	PDE1B_HUMAN	Calcium/calmodulin-dependent 3',5'-cyclic nucleotide phosphodiesterase 1B (EC 3.1.4.17) (Cam-PDE 1B) (63 kDa Cam-PDE).	chr12+53229670	-792.3
NM_000938	RPB2_HUMAN	DNA-directed RNA polymerase II 140 kDa polypeptide (EC 2.7.7.6) (RNA polymerase II subunit 2) (RPB2).	chr4+57539865	-849.3
NM_000938	RPB2_HUMAN	DNA-directed RNA polymerase II 140 kDa polypeptide (EC 2.7.7.6) (RNA polymerase II subunit 2) (RPB2).	chr4+57539865	-532.3
NM_000951	TMG2_HUMAN	Transmembrane gamma-carboxyglutamic acid protein 2 precursor (Proline- rich Gla protein 2) (Proline-rich gamma-carboxyglutamic acid protein 2).	chr19+54778279	-270.3
NM_000992	RL29_HUMAN	60S ribosomal protein L29 (Cell surface heparin binding protein HIP).	chr3-52002684	-333.3
NM_001001850	Q8N4C7_HUMAN	Similar to mouse A030009B12Rik protein.	chr3-95215904	-845.3
NM_001002017	Q68EN7_HUMAN	Host cell factor C1 regulator 1 (XPO1 dependant), isoform 2.	chr16-3012628	-456.3
NM_001003676	Q7L077_HUMAN	Hypothetical protein MGC4707.	chr11+46914826	-561.3
NM_001003689	LMBL2_HUMAN	Lethal(3)malignant brain tumor-like 2 protein (L(3)mbt-like 2 protein) (H-l(3)mbt-like protein).	chr22+39931258	-614.3
NM_001003795	Q69G40_HUMAN	Transcription factor GTF2IRD2 isoform 2.	chr7+74146307	-365.3
NM_001004341	Q6ZN32_HUMAN	Hypothetical protein FLJ16478.	chr1-155328459	-358.3
NM_001004426	O60733-2	85 kDa calcium-independent phospholipase A2 (EC 3.1.1.4) (iPLA2) (CaI- PLA2) (Group VI phospholipase A2) (GVI PLA2).	chr22-36837448	-768.7
NM_001004433	Q49AL9_HUMAN	SLC30A10 protein (Fragment).	chr1-218154228	-977.3
NM_001005192	OR7G1_HUMAN	Olfactory receptor 7G1 (Olfactory receptor 19-15) (OR19-15).	chr19-9086273	-667.3
NM_001005192	OR7G1_HUMAN	Olfactory receptor 7G1 (Olfactory receptor 19-15) (OR19-15).	chr19-9086273	-368.3
NM_001006615	Q8NC90_HUMAN	Hypothetical protein FLJ90410.	chr9-115117753	-739.3
NM_001007224	Q5ZPR6_HUMAN	Immune associated nucleotide 6c / GTPase, IMAP family member 6, isoform 1 (Hypothetical protein DKFZp686A01175).	chr7-149953398	-944.3
NM_001008740	Q7Z6W1_HUMAN	Novel protein (Hypothetical protein TMCO2).	chr1+40486159	-850.3
NM_001010940	Q5VTT2_HUMAN	OTTHUMP00000021439.	chr9+71625550	-472.3
NM_001012414	Q5EBN2_HUMAN	Tripartite motif-containing 61.	chr4-166095049	-818.3
NM_001012479	Q53Y88_HUMAN	Granulin.	chr17+39778016	-311.3
NM_001012731	ENK14_HUMAN	Hypothetical HERV-K_16p3.3 provirus ancestral Env polyprotein (Envelope polyprotein) [Contains: Surface protein (SU); Transmembrane protein (TM)].	chr16-2651151	-743.3
NM_001013649	Q6ZVA6_HUMAN	Hypothetical protein FLJ42818.	chr2-85690666	-736.3
NM_001013691	Q6ZTB9_HUMAN	Hypothetical protein FLJ44800.	chr19+11611590	-618.3
NM_001017395	TMCC1_HUMAN	Transmembrane and coiled-coil domains protein 1.	chr3-130849326	-505.3
NM_001024855	Q6PIQ2_HUMAN	ZNF197 protein.	chr3+44641514	-885.3
NM_001032293	O43670-2	Zinc finger protein 207.	chr17+27701269	-647.3
NM_001033549	Q9NWV8_HUMAN	Hypothetical protein FLJ20571 (Hypothetical protein DKFZp564N2378) (Hypothetical protein HSPC142).	chr19+17239231	-938.3
NM_001034837	KCIP1_HUMAN	Kv channel-interacting protein 1 (KChIP1) (A-type potassium channel modulatory protein 1) (Potassium channel-interacting protein 1) (Vesicle APC-binding protein).	chr5+169863625	-740.3
NM_001037162	Q3I5F7_HUMAN	Acyl-CoA thioesterase 6 (EC 3.1.2.2).	chr14+73153300	-239.3
NM_001037671	Q32Q52_HUMAN	Hypothetical protein.	chr12+91620970	-961.3
NM_001056	ST1C1_HUMAN	Sulfotransferase 1C1 (EC 2.8.2.-) (SULT1C#1) (ST1C2) (humSULTC2).	chr2+108271526	-777.3
NM_001247	ENP6_HUMAN	Ectonucleoside triphosphate diphosphohydrolase 6 (EC 3.6.1.6) (NTPDase6) (CD39 antigen-like 2).	chr20+25124371	-622.3
NM_001412	IF1AX_HUMAN	Eukaryotic translation initiation factor 1A, X-chromosomal (eIF-1A X isoform) (eIF-4C).	chrX-20052557	-464.3
NM_001419	ELAV1_HUMAN	ELAV-like protein 1 (Hu-antigen R) (HuR).	chr19-7929457	-981.3
NM_001655	COPD_HUMAN	Coatomer delta subunit (Delta-coat protein) (Delta-COP) (Archain).	chr11+117948320	-396.3
NM_001659	ARF3_HUMAN	ADP-ribosylation factor 3.	chr12-47616259	-898.3
NM_001727	BRS3_HUMAN	Bombesin receptor subtype-3 (BRS-3).	chrX+135397790	-664.3
NM_001863	CX6B1_HUMAN	Cytochrome c oxidase subunit VIb isoform 1 (EC 1.9.3.1) (COX VIb-1).	chr19+40830994	-773.3
NM_001863	CX6B1_HUMAN	Cytochrome c oxidase subunit VIb isoform 1 (EC 1.9.3.1) (COX VIb-1).	chr19+40830994	-412.3
NM_001872	CBPB2_HUMAN	Carboxypeptidase B2 precursor (EC 3.4.17.20) (Carboxypeptidase U) (Thrombin-activatable fibrinolysis inhibitor) (TAFI) (Plasma carboxypeptidase B) (pCPB).	chr13-45525323	-993.3
NM_001930	DHYS_HUMAN	Deoxyhypusine synthase (EC 2.5.1.46) (DHS).	chr19-12647533	-945.3
NM_001988	EVPL_HUMAN	Envoplakin (210 kDa paraneoplastic pemphigus antigen) (p210) (210 kDa cornified envelope precursor protein).	chr17-71514521	-650.3
NM_001991	EZH1_HUMAN	Enhancer of zeste homolog 1 (ENX-2).	chr17-38105819	-722.3
NM_002095	T2EB_HUMAN	Transcription initiation factor IIE beta subunit (TFIIE-beta).	chr8-30555576	-427
NM_002134	HMOX2_HUMAN	Heme oxygenase 2 (EC 1.14.99.3) (HO-2).	chr16+4466446	-596.3
NM_002269	IMA5_HUMAN	Importin alpha-6 subunit (Karyopherin alpha-5 subunit).	chr6+117109059	-645.3
NM_002301	LDHC_HUMAN	L-lactate dehydrogenase C chain (EC 1.1.1.27) (LDH-C) (LDH testis subunit) (LDH-X).	chr11+18390428	-894.3
NM_002377	MAS_HUMAN	MAS proto-oncogene.	chr6+160247963	-990.3
NM_002574	PRDX1_HUMAN	Peroxiredoxin 1 (EC 1.11.1.15) (Thioredoxin peroxidase 2) (Thioredoxin-dependent peroxide reductase 2) (Proliferation-associated protein PAG) (Natural killer cell-enhancing factor A) (NKEF-A).	chr1-45749294	-915.3
NM_002593	PCOC1_HUMAN	Procollagen C-endopeptidase enhancer 1 precursor (Procollagen COOH- terminal proteinase enhancer 1) (Procollagen C-proteinase enhancer 1) (PCPE-1) (Type I procollagen COOH-terminal proteinase enhancer) (Type 1 procollagen C-proteinase enhancer protein).	chr7+100037925	-460.3
NM_002687	PININ_HUMAN	Pinin (140 kDa nuclear and cell adhesion-related phosphoprotein) (Domain-rich serine protein) (DRS-protein) (DRSP) (Melanoma metastasis clone A protein) (Desmosome-associated protein) (SR-like protein) (Nuclear protein SDK3).	chr14+38714150	-548.3
NM_002696	RPB7_HUMAN	DNA-directed RNA polymerase II 19 kDa polypeptide (EC 2.7.7.6) (RPB7).	chr11+62285590	-234.3
NM_002727	PGSG_HUMAN	Secretory granule proteoglycan core protein precursor (Platelet proteoglycan core protein) (P.PG) (Hematopoetic proteoglycan core protein) (Serglycin).	chr10+70517833	-632.3
NM_002758	MP2K6_HUMAN	Dual specificity mitogen-activated protein kinase kinase 6 (EC 2.7.1.-) (MAP kinase kinase 6) (MAPKK 6) (MAPK/ERK kinase 6) (SAPKK3).	chr17+64922433	-532.3
NM_002791	PSA6_HUMAN	Proteasome subunit alpha type 6 (EC 3.4.25.1) (Proteasome iota chain) (Macropain iota chain) (Multicatalytic endopeptidase complex iota chain) (27 kDa prosomal protein) (PROS-27) (p27K).	chr14+34831324	-635.3
NM_002852	PTX3_HUMAN	Pentraxin-related protein PTX3 precursor (Pentaxin-related protein PTX3) (Tumor necrosis factor-inducible protein TSG-14).	chr3+158637300	-631.3
NM_002944	ROS_HUMAN	Proto-oncogene tyrosine-protein kinase ROS precursor (EC 2.7.1.112) (c-ros-1).	chr6-117716222	-700.3
NM_003012	SFRP1_HUMAN	Secreted frizzled-related protein 1 precursor (sFRP-1) (Frizzled- related protein 1) (FRP-1) (Secreted apoptosis-related protein 2) (SARP-2).	chr8-41238635	-462.3
NM_003025	SH3G1_HUMAN	SH3-containing GRB2-like protein 1 (SH3 domain protein 2B) (Extra eleven-nineteen leukemia fusion gene) (EEN) (EEN fusion partner of MLL).	chr19-4311367	-550.3
NM_003083	SNPC2_HUMAN	snRNA-activating protein complex subunit 2 (SNAPc subunit 2) (snRNA- activating protein complex 45 kDa subunit) (SNAPc 45 kDa subunit) (Small nuclear RNA-activating complex polypeptide 2) (Proximal sequence element-binding transcription factor delta subunit) (PSE- binding factor delta subunit) (PTF delta subunit).	chr19+7891228	-828.3
NM_003094	RUXE_HUMAN	Small nuclear ribonucleoprotein E (snRNP-E) (Sm protein E) (Sm-E) (SmE).	chr1+202097362	-356.3
NM_003114	SPAG1_HUMAN	Sperm-associated antigen 1 (Infertility-related sperm protein Spag-1) (HSD-3.8).	chr8+101239831	-973.3
NM_003116	SPAG4_HUMAN	Sperm-associated antigen 4 protein (Outer dense fiber-associated protein SPAG4).	chr20+33667222	-875.3
NM_003116	SPAG4_HUMAN	Sperm-associated antigen 4 protein (Outer dense fiber-associated protein SPAG4).	chr20+33667222	-565.3
NM_003131	SRF_HUMAN	Serum response factor (SRF).	chr6+43246897	-977.3
NM_003365	UQCR1_HUMAN	Ubiquinol-cytochrome-c reductase complex core protein I, mitochondrial precursor (EC 1.10.2.2).	chr3-48611435	-493.3
NM_003439	ZKSC1_HUMAN	Zinc finger with KRAB and SCAN domain-containing protein 1 (Zinc finger protein 36) (Zinc finger protein KOX18).	chr7+99451154	-931.3
NM_003451	ZN177_HUMAN	Zinc finger protein 177.	chr19+9334695	-828.3
NM_003460	ZP2_HUMAN	Zona pellucida sperm-binding protein 2 precursor (Zona pellucida glycoprotein ZP2) (Zona pellucida protein A).	chr16-21116273	-488.3
NM_003493	H3T_HUMAN	Histone H3.4 (H3t) (H3/t) (H3/g).	chr1-226679168	-479.3
NM_003540	H4_HUMAN	Histone H4.	chr6+26348632	-813.3
NM_003540	H4_HUMAN	Histone H4.	chr6+26348632	-486.3
NM_003547	Q99525_HUMAN	Histone H4 (Histone 1, H4g).	chr6-26354818	-963.3
NM_003635	HSST2_HUMAN	Heparin sulfate N-deacetylase/N-sulfotransferase (EC 2.8.2.-) (N-HSST) (N-heparin sulfate sulfotransferase) (Glucosaminyl N-deacetylase/N- sulfotransferase).	chr10-75231674	-618.3
NM_003725	O14756_HUMAN	Oxidoreductase (3-hydroxysteroid epimerase).	chr12+55443374	-316.3
NM_003833	MATN4_HUMAN	Matrilin-4 precursor.	chr20-43355500	-320.3
NM_003877	SOCS2_HUMAN	Suppressor of cytokine signaling 2 (SOCS-2) (Cytokine-inducible SH2 protein 2) (CIS-2) (STAT-induced STAT inhibitor 2) (SSI-2).	chr12+92487728	-747.7
NM_003879	CFLAR_HUMAN	CASP8 and FADD-like apoptosis regulator precursor (Cellular FLICE-like inhibitory protein) (c-FLIP) (Caspase-eight-related protein) (Casper) (Caspase-like apoptosis regulatory protein) (CLARP) (MACH-related inducer of toxicity) (MRIT) (Caspase homolog) (CASH) (Inhibitor of FLICE) (I-FLICE) (FADD-like antiapoptotic molecule 1) (Flame-1) (Usurpin) [Contains: CASP8 and FADD-like apoptosis regulator …	chr2+201689134	-198.3
NM_003882	WISP1_HUMAN	WNT1 inducible signaling pathway protein 1 precursor (WISP-1) (Wnt-1- induced secreted protein).	chr8+134272493	-599.3
NM_004071	CLK1_HUMAN	Dual specificity protein kinase CLK1 (EC 2.7.1.37) (EC 2.7.1.112) (CDC-like kinase 1).	chr2-201425977	-985.3
NM_004228	CYH2_HUMAN	Cytohesin-2 (ARF nucleotide-binding site opener) (ARNO protein) (ARF exchange factor).	chr19+53664423	-776.3
NM_004279	MPPB_HUMAN	Mitochondrial processing peptidase beta subunit, mitochondrial precursor (EC 3.4.24.64) (Beta-MPP) (P-52).	chr7+102725134	-745.3
NM_004435	NUCG_HUMAN	Endonuclease G, mitochondrial precursor (EC 3.1.30.-) (Endo G).	chr9+130620599	-482.3
NM_004523	KIF11_HUMAN	Kinesin-like protein KIF11 (Kinesin-related motor protein Eg5) (Kinesin-like spindle protein HKSP) (Thyroid receptor interacting protein 5) (TRIP5) (Kinesin-like protein 1).	chr10+94342970	-687.3
NM_004546	NIGM_HUMAN	NADH-ubiquinone oxidoreductase AGGG subunit, mitochondrial precursor (EC 1.6.5.3) (EC 1.6.99.3) (Complex I-AGGG) (CI-AGGG).	chr7+140042949	-367.3
NM_004556	IKBE_HUMAN	NF-kappaB inhibitor epsilon (NF-kappa-BIE) (I-kappa-B-epsilon) (IkappaBepsilon) (IKB-epsilon) (IKBE).	chr6-44333880	-202.7
NM_004558	NRTN_HUMAN	Neurturin precursor.	chr19+5774817	-480.3
NM_004619	TRAF5_HUMAN	TNF receptor-associated factor 5 (RING finger protein 84).	chr1+209566579	-529.3
NM_004752	GCM2_HUMAN	Chorion-specific transcription factor GCMb (Glial cells missing homolog 2) (GCM motif protein 2) (hGCMb).	chr6-10981449	-517.3
NM_004774	PPRB_HUMAN	Peroxisome proliferator-activated receptor-binding protein (PBP) (PPAR-binding protein) (Thyroid hormone receptor-associated protein complex 220 kDa component) (Trap220) (Thyroid receptor interacting protein 2) (TRIP-2) (p53 regulatory protein RB18A) (Vitamin D receptor-interacting protein complex component DRIP205) (Activator- recruited cofactor 205 kDa component) (ARC205).	chr17-34816379	-415.3
NM_004924	ACTN4_HUMAN	Alpha-actinin 4 (Non-muscle alpha-actinin 4) (F-actin cross linking protein).	chr19+43830166	-912.3
NM_004924	ACTN4_HUMAN	Alpha-actinin 4 (Non-muscle alpha-actinin 4) (F-actin cross linking protein).	chr19+43830166	-606.3
NM_004955	S29A1_HUMAN	Equilibrative nucleoside transporter 1 (Equilibrative nitrobenzylmercaptopurine riboside-sensitive nucleoside transporter) (Equilibrative NBMPR-sensitive nucleoside transporter) (Nucleoside transporter, es-type) (Solute carrier family 29 member 1).	chr6+44295370	-690.3
NM_005080	XBP1_HUMAN	X box binding protein 1 (XBP-1) (Tax-responsive element-binding protein 5).	chr22-27520548	-932
NM_005135	S12A6_HUMAN	Solute carrier family 12 member 6 (Electroneutral potassium-chloride cotransporter 3) (K-Cl cotransporter 3).	chr15-32312957	-514.3
NM_005147	DNJA3_HUMAN	DnaJ homolog subfamily A member 3, mitochondrial precursor (Tumorous imaginal discs protein Tid56 homolog) (DnaJ protein Tid-1) (hTid-1).	chr16+4415882	-645.3
NM_005516	HLAE_HUMAN	HLA class I histocompatibility antigen, alpha chain E precursor (MHC class I antigen E).	chr6+30565249	-746.3
NM_005529	PGBM_HUMAN	Basement membrane-specific heparan sulfate proteoglycan core protein precursor (HSPG) (Perlecan) (PLC).	chr1-22021324	-967
NM_005609	PHS2_HUMAN	Glycogen phosphorylase, muscle form (EC 2.4.1.1) (Myophosphorylase).	chr11-64270605	-692.3
NM_005626	SFRS4_HUMAN	Splicing factor, arginine/serine-rich 4 (Pre-mRNA splicing factor SRP75) (SRP001LB).	chr1-29346951	-802.3
NM_005642	TAF7_HUMAN	Transcription initiation factor TFIID subunit 7 (Transcription initiation factor TFIID 55 kDa subunit) (TAF(II)55) (TAFII-55) (TAFII55).	chr5-140678241	-592.3
NM_005679	TAF1C_HUMAN	TATA box binding protein-associated factor RNA polymerase I subunit C (TATA box binding protein-associated factor 1C) (TBP-associated factor 1C) (TBP-associated factor RNA polymerase I 110 kDa) (TAFI110).	chr16-82768962	-901.3
NM_005742	PDIA6_HUMAN	Protein disulfide-isomerase A6 precursor (EC 5.3.4.1) (Protein disulfide isomerase P5) (Thioredoxin domain-containing protein 7).	chr2-10840969	-909.3
NM_005877	SF3A1_HUMAN	Splicing factor 3 subunit 1 (Spliceosome associated protein 114) (SAP 114) (SF3a120).	chr22-29057976	-688.3
NM_006012	CLPP_HUMAN	Putative ATP-dependent Clp protease proteolytic subunit, mitochondrial precursor (EC 3.4.21.92) (Endopeptidase Clp).	chr19+6312462	-226.3
NM_006066	AK1A1_HUMAN	Alcohol dehydrogenase [NADP+] (EC 1.1.1.2) (Aldehyde reductase) (Aldo- keto reductase family 1 member A1).	chr1+45789084	-563.3
NM_006116	TAB1_HUMAN	Mitogen-activated protein kinase kinase kinase 7-interacting protein 1 (TGF-beta-activated kinase 1-binding protein 1) (TAK1-binding protein 1).	chr22+38125704	-303.3
NM_006335	TI17A_HUMAN	Mitochondrial import inner membrane translocase subunit Tim17-A (Inner membrane preprotein translocase Tim17a).	chr1+200191270	-519.3
NM_006371	CRTAP_HUMAN	Cartilage-associated protein precursor.	chr3+33130482	-934.3
NM_006423	PRA1_HUMAN	Prenylated Rab acceptor protein 1 (PRA1 family protein 1).	chr19-47152677	-859.3
NM_006493	CLN5_HUMAN	Ceroid-lipofuscinosis neuronal protein 5 (Protein CLN5).	chr13+76462795	-644.3
NM_006649	UT14A_HUMAN	U3 small nucleolar RNA-associated protein 14 homolog A (Antigen NY-CO- 16).	chrX+128867839	-771.3
NM_006753	SURF6_HUMAN	Surfeit locus protein 6.	chr9-135187373	-706.3
NM_006793	PRDX3_HUMAN	Thioredoxin-dependent peroxide reductase, mitochondrial precursor (EC 1.11.1.15) (Peroxiredoxin 3) (Antioxidant protein 1) (AOP-1) (MER5 protein homolog) (HBC189) (PRX III).	chr10-120917205	-731.3
NM_006799	TEST_HUMAN	Testisin precursor (EC 3.4.21.-) (Eosinophil serine protease 1) (ESP- 1).	chr16+2807164	-525.3
NM_006931	GTR3_HUMAN	Solute carrier family 2, facilitated glucose transporter member 3 (Glucose transporter type 3, brain).	chr12-7963093	-766.3
NM_006951	TAF5_HUMAN	Transcription initiation factor TFIID subunit 5 (Transcription initiation factor TFIID 100 kDa subunit) (TAF(II)100) (TAFII-100) (TAFII100).	chr10+105117713	-795.3
NM_007018	Q3MN79_HUMAN	Centrosomal protein 1 (Fragment).	chr9+122890394	-695.3
NM_007044	KTNA1_HUMAN	Katanin p60 ATPase-containing subunit A1 (EC 3.6.4.3) (Katanin p60 subunit A1) (p60 katanin).	chr6-149957864	-252.3
NM_007101	SARDH_HUMAN	Sarcosine dehydrogenase, mitochondrial precursor (EC 1.5.99.1) (SarDH) (BPR-2).	chr9-135518506	-640.3
NM_007139	Q8N229_HUMAN	Hypothetical protein FLJ36247.	chr7+64476202	-489.3
NM_007145	OZF_HUMAN	Zinc finger protein OZF (Only zinc finger protein) (Zinc finger protein 146).	chr19+41411487	-676.3
NM_007149	ZN184_HUMAN	Zinc finger protein 184.	chr6-27526505	-868.3
NM_007190	S23IP_HUMAN	SEC23-interacting protein (p125).	chr10+121642212	-677.3
NM_007198	PROSC_HUMAN	Proline synthetase co-transcribed bacterial homolog protein.	chr8+37738832	-470.3
NM_007370	RFC5_HUMAN	Activator 1 36 kDa subunit (Replication factor C 36 kDa subunit) (A1 36 kDa subunit) (RF-C 36 kDa subunit) (RFC36) (Replication factor C subunit 5).	chr12+116938892	-826.3
NM_012145	DTYMK_HUMAN	Thymidylate kinase (EC 2.7.4.9) (dTMP kinase).	chr2-242263829	-823.3
NM_012160	FBXL4_HUMAN	F-box/LRR-repeat protein 4 (F-box and leucine-rich repeat protein 4) (F-box protein FBL4/FBL5).	chr6-99428321	-707.3
NM_012256	ZN212_HUMAN	Zinc finger protein 212 (Zinc finger protein C2H2-150).	chr7+148567706	-841.3
NM_012326	MARE3_HUMAN	Microtubule-associated protein RP/EB family member 3 (End-binding protein 3) (EB3) (EB1 protein family member 3) (EBF3) (RP3).	chr2+27047028	-626.3
NM_012429	S14L2_HUMAN	SEC14-like protein 2 (Alpha-tocopherol associated protein) (TAP) (hTAP) (Supernatant protein factor) (SPF) (Squalene transfer protein).	chr22+29122932	-410.3
NM_012449	STEA1_HUMAN	Six transmembrane epithelial antigen of prostate 1.	chr7+89621624	-503
NM_012463	VPP2_HUMAN	Vacuolar proton translocating ATPase 116 kDa subunit a isoform 2 (V- ATPase 116-kDa isoform a2) (TJ6).	chr12+122762817	-361.3
NM_013256	ZN180_HUMAN	Zinc finger protein 180 (HHZ168).	chr19-49671700	-689.3
NM_013259	TAGL3_HUMAN	Transgelin-3 (Neuronal protein NP25) (Neuronal protein 22) (NP22).	chr3+113200275	-393.3
NM_013293	TRA2A_HUMAN	Transformer-2 protein homolog (TRA-2 alpha).	chr7-23510926	-588.3
NM_013360	ZN222_HUMAN	Zinc finger protein 222.	chr19+49221355	-926.3
NM_014160	MKRN2_HUMAN	Makorin-2 (RING finger protein 62).	chr3+12573593	-834.3
NM_014230	SRP68_HUMAN	Signal recognition particle 68 kDa protein (SRP68).	chr17-71546785	-877.3
NM_014365	HSPB8_HUMAN	Heat-shock protein beta-8 (HspB8) (Alpha crystallin C chain) (Small stress protein-like protein HSP22) (E2-induced gene 1 protein) (Protein kinase H11).	chr12+118100977	-904.3
NM_014470	RND1_HUMAN	Rho-related GTP-binding protein Rho6 (Rho family GTPase 1) (Rnd1).	chr12-47537199	-851.3
NM_014602	PI3R4_HUMAN	Phosphoinositide 3-kinase regulatory subunit 4 (EC 2.7.1.37) (PI3- kinase regulatory subunit 4) (PI3-kinase p150 subunit) (Phosphoinositide 3-kinase adaptor protein).	chr3-131880467	-582.3
NM_014929	Q9NVX6_HUMAN	Hypothetical protein FLJ10453.	chr2+207339610	-472.3
NM_014930	ZN510_HUMAN	Zinc finger protein 510.	chr9-98557967	-588.3
NM_015001	MINT_HUMAN	Msx2-interacting protein (SPEN homolog) (SMART/HDAC1 associated repressor protein).	chr1+16046945	-840.3
NM_015002	FBX21_HUMAN	F-box only protein 21.	chr12-116065967	-497.3
NM_015044	GGA2_HUMAN	ADP-ribosylation factor binding protein GGA2 (Golgi-localized, gamma ear-containing, ARF-binding protein 2) (Gamma-adaptin-related protein 2) (VHS domain and ear domain of gamma-adaptin) (Vear).	chr16-23383144	-773.3
NM_015438	Q7Z5X4_HUMAN	Intermediate filament-like protein MGC:2625, isoform 1.	chr12-6518966	-382.3
NM_015511	CT004_HUMAN	Protein C20orf4.	chr20+34287860	-959.3
NM_015540	Q9NSQ5_HUMAN	Hypothetical protein DKFZp434E1120 (Fragment).	chr15-39596667	-292.3
NM_015607	CA077_HUMAN	Protein C1orf77.	chr1+151873148	-978.3
NM_015698	GPKOW_HUMAN	G patch domain and KOW motifs protein (T54 protein).	chrX-48857289	-323.3
NM_015836	SYWM_HUMAN	Tryptophanyl-tRNA synthetase, mitochondrial precursor (EC 6.1.1.2) (Tryptophan--tRNA ligase) (TrpRS) ((Mt)TrpRS).	chr1-119375363	-476.3
NM_015933	Q9P052_HUMAN	HSPC330 (Fragment).	chr3+48456689	-734.3
NM_016002	SCPDH_HUMAN	Probable saccharopine dehydrogenase (EC 1.5.1.9).	chr1+244954000	-277.3
NM_016030	TTC15_HUMAN	Tetratricopeptide repeat protein 15 (TPR repeat protein 15).	chr2+3362452	-606.3
NM_016058	Q8IWR6_HUMAN	CGI-121 S1 isoform.	chr2-73810511	-436
NM_016332	MSRX_HUMAN	Methionine-R-sulfoxide reductase (EC 1.8.4.-) (Selenoprotein X 1).	chr16-1928234	-624.3
NM_016390	Q5T280_HUMAN	OTTHUMP00000022300.	chr9-130624166	-623.3
NM_016399	15E1_HUMAN	UPF0203 protein 15E1.1.	chr12-119366147	-772.3
NM_016478	NIPA_HUMAN	Nuclear-interacting partner of ALK (Nuclear-interacting partner of anaplastic lymphoma kinase) (hNIPA) (Zinc finger C3HC-type protein 1).	chr7-129445361	-877.3
NM_016539	SIRT6_HUMAN	Mono-ADP-ribosyltransferase sirtuin-6 (EC 2.4.2.31) (SIR2-like protein 6).	chr19-4125106	-487.3
NM_016594	FKB11_HUMAN	FK506-binding protein 11 precursor (EC 5.2.1.8) (Peptidyl-prolyl cis- trans isomerase) (PPIase) (Rotamase) (19 kDa FK506-binding protein) (FKBP-19).	chr12-47602009	-844.3
NM_016952	O14631_HUMAN	CDO.	chr11-125331926	-981.3
NM_017444	CHRC1_HUMAN	Chromatin accessibility complex protein 1 (CHRAC-1) (CHRAC-15) (HuCHRAC15) (DNA polymerase epsilon subunit p15).	chr8+141590585	-998.3
NM_017506	OR7A5_HUMAN	Olfactory receptor 7A5 (Olfactory receptor TPCR92).	chr19-14798139	-847.3
NM_017576	Q86VH0_HUMAN	KIF27C.	chr9-85641436	-805.3
NM_017692	Q5T781_HUMAN	Aprataxin (Forkhead-associated domain histidine triad-like protein) (FHA-HIT).	chr9-32962608	-946.3
NM_017721	Q8NF89_HUMAN	Hypothetical protein FLJ20475.	chr19+13864992	-682.7
NM_017739	PMGT1_HUMAN	Protein O-linked-mannose beta-1,2-N-acetylglucosaminyltransferase 1 (EC 2.4.1.-) (POMGnT1) (UDP-GlcNAc:alpha-D-mannoside beta-1,2-N- acetylglucosaminyltransferase I.2) (GnT I.2).	chr1-46426941	-623.3
NM_017777	Q96G13_HUMAN	FLJ20345 protein.	chr17-53637801	-851.3
NM_017817	RAB20_HUMAN	Ras-related protein Rab-20.	chr13-109973414	-773.7
NM_017829	Q9BXW7-2	n/a (Cat eye syndrome critical region protein 5 precursor.)	chr22-15998410	-587.3
NM_017854	Q9NX00_HUMAN	Hypothetical protein FLJ20512.	chr19-52241007	-588.3
NM_017873	ASB6_HUMAN	Ankyrin repeat and SOCS box protein 6 (ASB-6).	chr9-131436703	-675.3
NM_018034	Q9NW82_HUMAN	Hypothetical protein FLJ10233 (Hypothetical protein WDR70).	chr5+37415168	-491.3
NM_018143	Q9NVR0_HUMAN	Hypothetical protein FLJ10572 (Kelch-like 11).	chr17-37263324	-779.3
NM_018143	Q9NVR0_HUMAN	Hypothetical protein FLJ10572 (Kelch-like 11).	chr17-37263324	-608.3
NM_018332	DD19A_HUMAN	ATP-dependent RNA helicase DDX19A (EC 3.6.1.-) (DEAD box protein 19A) (DDX19-like protein).	chr16+68938324	-401
NM_018342	Q7Z5S9_HUMAN	Hypothetical protein FLJ11155.	chr4+159351125	-765.3
NM_018403	DCP1A_HUMAN	mRNA decapping enzyme 1A (EC 3.-.-.-) (Transcription factor SMIF) (Smad4-interacting transcriptional co-activator).	chr3-53296427	-714.3
NM_018407	Q7L909_HUMAN	Hypothetical protein NT2RM1000066 (LAPTM4B protein) (Lysosomal- associated transmembrane protein 4 beta).	chr8+98856984	-147.3
NM_018416	FOXJ2_HUMAN	Forkhead box protein J2 (Fork head homologous X).	chr12+8076625	-914.3
NM_018462	Q8WUW1_HUMAN	Chromosome 3 open reading frame 10 (Brk1-like protein).	chr3+10132332	-526.3
NM_018842	Q75L21_HUMAN	Hypothetical protein LOC55971 (Fragment).	chr7-97760491	-803.3
NM_019027	Q9NXG3_HUMAN	Hypothetical protein FLJ20273.	chr4-40120497	-417
NM_019079	Q8NDA1_HUMAN	Hypothetical protein DKFZp434B1629 (ES cell associated transcript 11).	chr1+62433123	-780.3
NM_019894	TMPS4_HUMAN	Transmembrane protease, serine 4 (EC 3.4.21.-) (Membrane-type serine protease 2) (MT-SP2).	chr11+117452975	-694.3
NM_020117	SYLC_HUMAN	Leucyl-tRNA synthetase, cytoplasmic (EC 6.1.1.4) (Leucine--tRNA ligase) (LeuRS).	chr5-145473221	-935.3
NM_020117	SYLC_HUMAN	Leucyl-tRNA synthetase, cytoplasmic (EC 6.1.1.4) (Leucine--tRNA ligase) (LeuRS).	chr5-145473221	-616.3
NM_020150	SAR1A_HUMAN	GTP-binding protein SAR1a (COPII-associated small GTPase).	chr10-71579973	-525.3
NM_020409	RM47_HUMAN	39S ribosomal protein L47, mitochondrial precursor (L47mt) (MRP-L47).	chr3-180788950	-927.3
NM_020547	AMHR2_HUMAN	Anti-Muellerian hormone type II receptor precursor (EC 2.7.1.37) (AMH type II receptor) (MIS type II receptor) (MISRII) (MRII).	chr12+52103907	-655.3
NM_020960	GP107_HUMAN	Protein GPR107 precursor (Lung seven transmembrane receptor 1).	chr9+131855856	-731.3
NM_021066	H2A8_HUMAN	Histone H2A type 8.	chr6-27890059	-965.3
NM_021232	Q9UF12_HUMAN	Kidney and liver proline oxidase 1.	chr19-40982731	-592.3
NM_021245	MYOZ1_HUMAN	Myozenin-1 (Calsarcin-2) (Filamin-, actinin- and telethonin-binding protein) (Protein FATZ).	chr10-75061420	-517.3
NM_021632	ZN350_HUMAN	Zinc finger protein 350 (Zinc-finger protein ZBRK1) (Zinc finger and BRCA1-interacting protein with a KRAB domain 1).	chr19-57159406	-692.3
NM_021639	Q9HC44_HUMAN	Hypothetical protein DKFZp434H1428 (Hypothetical protein GPBP1L1) (Hypothetical protein SP192) (Novel protein).	chr1-45865567	-424.3
NM_021814	Q59EL3_HUMAN	Homolog of yeast long chain polyunsaturated fatty acid elongatio (Fragment).	chr6-53240154	-828.3
NM_022477	Q96SM2_HUMAN	Hypothetical protein FLJ14759 / NDRG3 protein.	chr20-34713583	-813.3
NM_023948	MSPD3_HUMAN	Motile sperm domain-containing protein 3.	chr7+100048068	-774.3
NM_024032	Q8N3J3_HUMAN	Hypothetical protein DKFZp762B192.	chr17+39574851	-952.3
NM_024032	Q8N3J3_HUMAN	Hypothetical protein DKFZp762B192.	chr17+39574851	-781.3
NM_024032	Q8N3J3_HUMAN	Hypothetical protein DKFZp762B192.	chr17+39574851	-364.3
NM_024099	Q9BQE6_HUMAN	MGC2477 protein.	chr11-62186864	-843
NM_024110	CAR14_HUMAN	Caspase recruitment domain protein 14 (CARD-containing MAGUK protein 2) (Carma 2).	chr17+75766875	-877.3
NM_024345	Q32NE2_HUMAN	WD repeat domain 32.	chr9+37791295	-981.3
NM_024576	Q5TC84_HUMAN	OTTHUMP00000016711.	chr6+72055197	-960.3
NM_024635	Q9H631_HUMAN	Hypothetical protein FLJ22643.	chr9+87745880	-941.3
NM_024669	Q9HAD3_HUMAN	Hypothetical protein FLJ11795.	chr5-55431264	-577.3
NM_024833	Q9H5E9_HUMAN	Hypothetical protein FLJ23506.	chr19-62922931	-359.3
NM_024886	CJ095_HUMAN	Hypothetical protein C10orf95.	chr10-104199583	-930.3
NM_025057	Q9H5P8_HUMAN	Hypothetical protein FLJ23189.	chr14+73586209	-182.3
NM_025073	Q9H778_HUMAN	Hypothetical protein FLJ21168.	chr1-115116925	-398.3
NM_025107	Q9H763_HUMAN	Hypothetical protein FLJ21269.	chr6+153060730	-511.3
NM_025145	Q8NDM7_HUMAN	Hypothetical protein DKFZp434L086 (Novel protein) (Fragment).	chr10-105879636	-876.3
NM_025181	Q8WV83_HUMAN	Solute carrier family 35, member F5 (NS5ATP3) (VPPR2545) (Hypothetical protein FLJ22004).	chr2-114188402	-585.3
NM_025243	Q9BZV2_HUMAN	Solute carrier 19A3 (Orphan transporter SLC19A3) (Solute carrier family 19, member 3) (Hypothetical protein SLC19A3).	chr2-228258170	-970.3
NM_025249	K1683_HUMAN	Protein KIAA1683.	chr19-18228908	-946.7
NM_030570	UPK3B_HUMAN	Uroplakin-3B precursor (Uroplakin IIIb) (UPIIIb) (p35).	chr7+75977680	-728.3
NM_030765	Q8WY02_HUMAN	Beta-1,3-galactosyltransferase-related protein.	chr12+121254180	-680.3
NM_030813	SKD3_HUMAN	Suppressor of potassium transport defect 3 (SKD3 protein).	chr11-71681119	-877.3
NM_030979	PABP3_HUMAN	Polyadenylate-binding protein 3 (Poly(A)-binding protein 3) (PABP 3) (Testis-specific poly(A)-binding protein).	chr13+24568275	-818.3
NM_031219	Q9BSH5_HUMAN	Haloacid dehalogenase-like hydrolase domain containing 3 (OTTHUMP00000021957).	chr9-115175518	-103.3
NM_032015	RNF26_HUMAN	RING finger protein 26.	chr11+118710446	-704.3
NM_032132	Q5T5I3_HUMAN	Novel protein (DKFZp434A1315) (Fragment).	chr1-148937165	-344.3
NM_032193	Q8TDP1_HUMAN	RNase H1 small subunit (AYP1).	chr11-65243617	-286.7
NM_032262	Q9H0A3_HUMAN	Hypothetical protein DKFZp434N035 (Em:AC007050.6 protein).	chr22+19385401	-125.3
NM_032264	Q5VTG2_HUMAN	Hypothetical protein RP11-293F5.5.	chr1+21639217	-949.3
NM_032287	Q6ICC9_HUMAN	DJ1033E15.2 protein (Leucine zipper, down-regulated in cancer 1-like protein) (OTTHUMP00000028912).	chr22-43267113	-589.3
NM_032339	Q9BRT3_HUMAN	Chromosome 17 open reading frame 37 (XTP4) (C35 protein).	chr17-35138936	-498.3
NM_032346	Q9BRP1_HUMAN	Hypothetical protein MGC13096.	chr19+39587142	-936.3
NM_032704	TBA6_HUMAN	Tubulin alpha-6 chain (Alpha-tubulin 6).	chr12+47945131	-952.3
NM_032773	Q96II8_HUMAN	Leucine-rich repeats and calponin homology (CH) domain containing 3.	chr3+199002541	-440.3
NM_032816	Q96ST8_HUMAN	Hypothetical protein FLJ14640.	chr19-38061745	-859.3
NM_032859	Q7L211_HUMAN	Hypothetical protein C13orf6 (OTTHUMP00000018692).	chr13+107668763	-808.3
NM_052818	Q9UQP6_HUMAN	Hypothetical protein.	chr13-31873813	-221.3
NM_058163	Q969E8_HUMAN	Hypothetical protein DT1P1A10 (Novel protein).	chrX+54483577	-698.3
NM_080429	AQP10_HUMAN	Aquaporin-10 (AQP-10) (Small intestine aquaporin).	chr1+152560215	-487.3
NM_130387	ASB14_HUMAN	Ankyrin repeat and SOCS box protein 14 (ASB-14).	chr3-57277418	-430.3
NM_130770	Q8WXA8_HUMAN	5-hydroxytryptamine receptor 3 subunit C.	chr3+185253528	-472.3
NM_133491	SAT2_HUMAN	Diamine acetyltransferase 2 (EC 2.3.1.57) (Spermidine/spermine N(1)- acetyltransferase 2) (Polyamine N-acetyltransferase 2).	chr17-7470280	-708.3
NM_138371	Q96B20_HUMAN	MGC16044 protein.	chr12+45896318	-306.3
NM_138443	CCDC5_HUMAN	Coiled-coil domain-containing protein 5 (Enhancer of invasion-cluster) (HEI-C).	chr18+41938322	-535.3
NM_138691	TMC1_HUMAN	Transmembrane cochlear-expressed protein 1.	chr9+74326536	-148.3
NM_138723	B2L14_HUMAN	Apoptosis facilitator Bcl-2-like 14 protein (Apoptosis regulator Bcl- G).	chr12+12115144	-357.3
NM_144567	Q5VTE6_HUMAN	Novel protein.	chr1-211232147	-289.3
NM_144589	Q86VU5_HUMAN	Catechol-O-methyltransferase domain containing 1 (Methyltransferase).	chr10-76663735	-909
NM_144675	Q8TB81_HUMAN	Hypothetical protein MGC18079.	chr16-27709716	-568.3
NM_144676	TMED6_HUMAN	Transmembrane emp24 domain containing protein 6 precursor.	chr16-67934660	-700.3
NM_144681	Q96M95_HUMAN	Hypothetical protein FLJ32734.	chr17-8573976	-654.3
NM_144683	Q6UX07_HUMAN	EALL419.	chr17-24248927	-927.3
NM_144719	CCDCD_HUMAN	Coiled-coil domain-containing protein 13.	chr3-42724885	-784.3
NM_145262	Q6Y2K6_HUMAN	LP5910 protein / HBeAg-binding protein 2.	chr3+52296911	-337.3
NM_145275	Q8TB06_HUMAN	Kinesin light chain 2-like, isoform b.	chr19+50535837	-545.3
NM_145295	Q6NT81_HUMAN	LOC199692 protein (Fragment).	chr19+11569326	-393.3
NM_147128	Q8NEX1_HUMAN	Ells2 (Fragment).	chr7+30290447	-463.3
NM_152279	Z585B_HUMAN	Zinc finger protein 585B (zinc finger protein 41-like protein).	chr19-42367563	-451.3
NM_152281	Q9HAE6_HUMAN	Hypothetical protein FLJ11752 / SCYL1BP1 protein (NTKL-binding protein 1).	chr1+168767893	-731.3
NM_152331	PTE2B_HUMAN	Peroxisomal acyl coenzyme A thioester hydrolase Ib (EC 3.1.2.2) (Peroxisomal long-chain acyl-coA thioesterase Ib) (PTE-Ib) (PTE-2b).	chr14+73128162	-251.3
NM_152353	Q8NHS1_HUMAN	Hypothetical protein MGC33839.	chr19-56562163	-302.3
NM_152412	Q8N1Q0_HUMAN	Hypothetical protein FLJ38002.	chr8+126054732	-990.3
NM_152420	CI041_HUMAN	Protein C9orf41.	chr9-76787694	-575.3
NM_152558	Q6IPM2_HUMAN	IQ motif containing E.	chr7+2565157	-840.3
NM_152692	Q96EU7_HUMAN	C1GALT1-specific chaperone 1 (Beta1,3-galactosyltransferase) (MSTP143 protein) (Core 1 beta3-galactosyltransferase-specific molecular chaperone) (HSPC067).	chrX-119643563	-962.3
NM_152707	GDC_HUMAN	Grave disease carrier protein (GDC) (Grave disease autoantigen) (GDA) (Mitochondrial solute carrier protein homolog).	chr10-69912103	-699.3
NM_152773	Q8WW35_HUMAN	Hypothetical protein MGC33212.	chr3-197502495	-656.3
NM_152776	Q8N5E6_HUMAN	Hypothetical protein MGC40579.	chr3-143365103	-296.3
NM_153044	Q8N0Y4_HUMAN	Hypothetical protein FLJ35801 (Hypothetical protein FLJ25819).	chr22+29648395	-423.3
NM_153260	Q8N1T6_HUMAN	Hypothetical protein FLJ37572.	chr15-40622013	-752.3
NM_153614	DNJBD_HUMAN	DnaJ homolog subfamily B member 13 (Testis spermatocyte apoptosis- related gene 6 protein) (Testis and spermatogenesis cell related protein 6) (Testis spermatogenesis apoptosis-related gene 6 protein) (Testis spermatogenesis apoptosise-related gene 3 protein).	chr11+73339011	-400.3
NM_172138	IL28A_HUMAN	Interleukin-28A precursor (IL-28A) (Interferon lambda-2) (IFN-lambda- 2) (Cytokine ZCYTO20).	chr19+44450996	-625.7
NM_173467	FABD_HUMAN	Malonyl CoA-acyl carrier protein transacylase, mitochondrial precursor (EC 2.3.1.39) (MCT) (Mitochondrial malonyltransferase).	chr22-41858831	-442.3
NM_173507	Q8N9H9_HUMAN	Hypothetical protein FLJ37118.	chr1-10929119	-537.3
NM_173516	Q5TAP7_HUMAN	Poly(A)-specific ribonuclease (PARN)-like domain containing 1 (Fragment).	chr6+160141290	-907.3
NM_173518	Q4G0Z9_HUMAN	Hypothetical protein.	chr8+67948883	-298.3
NM_173537	Q69G40_HUMAN	Transcription factor GTF2IRD2 isoform 2.	chr7-73848419	-371.3
NM_173633	Q8NBT3_HUMAN	CDNA FLJ90805 fis, clone Y79AA1000521.	chr19+47509327	-417.3
NM_173803	Q8N8E9_HUMAN	Hypothetical protein FLJ39599.	chr16+15397136	-320.3
NM_173830	CF182_HUMAN	Protein C6orf182.	chr6+109557199	-194.3
NM_174896	Q5QNZ1_HUMAN	Novel protein.	chr1+111818126	-990.3
NM_174901	FAM9C_HUMAN	Protein FAM9C.	chrX-12963752	-906.3
NM_174951	FAM9A_HUMAN	Protein FAM9A.	chrX-8718838	-539.3
NM_175571	Q8ND71_HUMAN	Hypothetical protein DKFZp667I133 (GTPase, IMAP family member 8) (IanT protein).	chr7+149778894	-857.3
NM_177441	Q8NDI2_HUMAN	Hypothetical protein DKFZp566L1346.	chr17+39620099	-975.7
NM_177938	EGLX_HUMAN	Putative HIF-prolyl hydroxylase PH-4 (EC 1.14.11.-) (Hypoxia-inducible factor prolyl 4-hydroxylase).	chr3+49002344	-904.3
NM_178508	CF001_HUMAN	Protein C6orf1 precursor.	chr6-34322135	-580.3
NM_178558	Q8NEM1_HUMAN	Zinc finger protein 680.	chr7-63617697	-879.3
NM_178828	CI079_HUMAN	Protein C9orf79.	chr9+89687591	-940.3
NM_181727	Q7Z6I5_HUMAN	Spermatogenesis-related protein 5.	chr3+57069508	-535.3
NM_182574	Q8N9Y3_HUMAN	Hypothetical protein FLJ36070.	chr19-53908064	-855.3
NM_182801	Q8N124_HUMAN	Hypothetical protein FLJ39155 (Hypothetical protein FLJ35675).	chr5+38481392	-679.3
NM_198040	PHC2_HUMAN	Polyhomeotic-like protein 2 (hPH2) (Early development regulatory protein 2).	chr1-33561813	-549.3
NM_198055	ZNF42_HUMAN	Zinc finger protein 42 (Myeloid zinc finger 1) (MZF-1) (Zinc finger and SCAN domain containing protein 6).	chr19-63765096	-946.3
NM_198461	Q6ZSR4_HUMAN	Hypothetical protein FLJ45273 (Hypothetical protein LONRF2).	chr2-100266435	-275.3
NM_198481	Q496B6_HUMAN	UNQ3033 protein.	chr19-59235899	-944.3
NM_198559	Q7Z7H3_HUMAN	Hypothetical gene supported by BC052750.	chr2+218929822	-261.3
NM_198692	KR10B_HUMAN	Keratin-associated protein 10-11 (Keratin-associated protein 10.11) (High sulfur keratin-associated protein 10.11) (Keratin-associated protein 18-11) (Keratin-associated protein 18.11).	chr21+44890758	-379.3
NM_198920	Q5T4W1_HUMAN	OTTHUMP00000016787.	chr6-83658907	-903.3
NM_199001	Q86UY7_HUMAN	Similar to RIKEN cDNA 2310002J15 gene.	chr9+139239464	-563.3
NM_201593	Q5UM68_HUMAN	Voltage-dependent calcium channel beta 2f subunit.	chr10+18469611	-990.3
NM_203309	Q86WZ0_HUMAN	Hypothetical protein MGC48595.	chr14-73014945	-294.3
NM_203397	Q8N5X8_HUMAN	Hypothetical protein LOC255374.	chr7+99562255	-445.3
NM_205849	FAM9B_HUMAN	Protein FAM9B.	chrX-8953038	-487.3
NM_206908	Q5TIC5_HUMAN	OTTHUMP00000016669 (Fragment).	chr6-58347232	-479.3
NM_206963	TIG1_HUMAN	Retinoic acid receptor responder protein 1 (Tazarotene-induced gene 1 protein) (RAR-responsive protein TIG1).	chr3-159897592	-904.3
NM_207320	Q7L8S5_HUMAN	Hypothetical protein FLJ25831.	chrX+69199065	-699.3
NM_207420	Q6PXP3_HUMAN	Intestinal facilitative glucose transporter 7.	chr1-8985945	-485.3
NM_207509	Q6ZQW9_HUMAN	Hypothetical protein FLJ46836.	chr9-131942709	-282.3
NM_213560	PKN1_HUMAN	Protein kinase N1 (EC 2.7.1.37) (Protein kinase C-like 1) (Protein- kinase C-related kinase 1) (Protein kinase C-like PKN) (Serine- threonine protein kinase N) (Protein kinase PKN-alpha).	chr19+14412085	-452.3
NM_213605	ZN517_HUMAN	Zinc finger protein 517.	chr8+145995064	-500.3
NM_214462	Q8WYW2_HUMAN	Hypothetical protein pp13671.	chr6-168450432	-565.3
S59184	RYK_HUMAN	Tyrosine-protein kinase RYK precursor (EC 2.7.1.112).	chr3-135358666	-724.3
X62515	PGBM_HUMAN	Basement membrane-specific heparan sulfate proteoglycan core protein precursor (HSPG) (Perlecan) (PLC).	chr1-22021826	-967
X91141	RABE1_HUMAN	Rab GTPase binding effector protein 1 (Rabaptin-5) (Rabaptin-5alpha) (Rabaptin-4).	chr17+5126316	-902.3
X95677	Q13802_HUMAN	ArgBPIB protein.	chr2+203964007	-498.3
Y15718	Q53QV1_HUMAN	Hypothetical protein DTNB (Fragment).	chr2-25490516	-959.3

## Sheet: Pred_Mito_Genes
Gene/Protein name	Common Name	Description	Gene_position	MURE1-CHOP-TTF1 Offset
AF095737	Q9UL10_HUMAN	Hypothetical protein SARDH.	chr9-135580064	-636
AL832016	Q86TC6_HUMAN	Hypothetical protein DKFZp451F074 (Fragment).	chr8+17453754	-361
AY493416	SYEP_HUMAN	Bifunctional aminoacyl-tRNA synthetase [Includes: Glutamyl-tRNA synthetase (EC 6.1.1.17) (Glutamate--tRNA ligase); Prolyl-tRNA synthetase (EC 6.1.1.15) (Proline--tRNA ligase)].	chr1-218208642	-297
BC001407	Q9BV83_HUMAN	SLC25A16 protein.	chr10-69955226	-680
BC032525	Q8N5C9_HUMAN	SLC30A6 protein.	chr2+32276330	-788
NM_000159	GCDH_HUMAN	Glutaryl-CoA dehydrogenase, mitochondrial precursor (EC 1.3.99.7) (GCD).	chr19+12862973	-859
NM_000664	Q6KEV6_HUMAN	Acetyl-CoA carboxylase-alpha (EC 6.4.1.2) (Fragment).	chr17-32516040	-905
NM_001863	CX6B1_HUMAN	Cytochrome c oxidase subunit VIb isoform 1 (EC 1.9.3.1) (COX VIb-1).	chr19+40830994	-773
NM_001863	CX6B1_HUMAN	Cytochrome c oxidase subunit VIb isoform 1 (EC 1.9.3.1) (COX VIb-1).	chr19+40830994	-412
NM_002574	PRDX1_HUMAN	Peroxiredoxin 1 (EC 1.11.1.15) (Thioredoxin peroxidase 2) (Thioredoxin-dependent peroxide reductase 2) (Proliferation-associated protein PAG) (Natural killer cell-enhancing factor A) (NKEF-A).	chr1-45749294	-915
NM_003365	UQCR1_HUMAN	Ubiquinol-cytochrome-c reductase complex core protein I, mitochondrial precursor (EC 1.10.2.2).	chr3-48611435	-493
NM_004279	MPPB_HUMAN	Mitochondrial processing peptidase beta subunit, mitochondrial precursor (EC 3.4.24.64) (Beta-MPP) (P-52).	chr7+102725134	-745
NM_004435	NUCG_HUMAN	Endonuclease G, mitochondrial precursor (EC 3.1.30.-) (Endo G).	chr9+130620599	-482
NM_004546	NIGM_HUMAN	NADH-ubiquinone oxidoreductase AGGG subunit, mitochondrial precursor (EC 1.6.5.3) (EC 1.6.99.3) (Complex I-AGGG) (CI-AGGG).	chr7+140042949	-367
NM_005147	DNJA3_HUMAN	DnaJ homolog subfamily A member 3, mitochondrial precursor (Tumorous imaginal discs protein Tid56 homolog) (DnaJ protein Tid-1) (hTid-1).	chr16+4415882	-645
NM_006012	CLPP_HUMAN	Putative ATP-dependent Clp protease proteolytic subunit, mitochondrial precursor (EC 3.4.21.92) (Endopeptidase Clp).	chr19+6312462	-226
NM_006335	TI17A_HUMAN	Mitochondrial import inner membrane translocase subunit Tim17-A (Inner membrane preprotein translocase Tim17a).	chr1+200191270	-519
NM_006793	PRDX3_HUMAN	Thioredoxin-dependent peroxide reductase, mitochondrial precursor (EC 1.11.1.15) (Peroxiredoxin 3) (Antioxidant protein 1) (AOP-1) (MER5 protein homolog) (HBC189) (PRX III).	chr10-120917205	-731
NM_007101	SARDH_HUMAN	Sarcosine dehydrogenase, mitochondrial precursor (EC 1.5.99.1) (SarDH) (BPR-2).	chr9-135518506	-640
NM_014160	MKRN2_HUMAN	Makorin-2 (RING finger protein 62).	chr3+12573593	-834
NM_014365	HSPB8_HUMAN	Heat-shock protein beta-8 (HspB8) (Alpha crystallin C chain) (Small stress protein-like protein HSP22) (E2-induced gene 1 protein) (Protein kinase H11).	chr12+118100977	-904
NM_015836	SYWM_HUMAN	Tryptophanyl-tRNA synthetase, mitochondrial precursor (EC 6.1.1.2) (Tryptophan--tRNA ligase) (TrpRS) ((Mt)TrpRS).	chr1-119375363	-476
NM_017829	Q9BXW7-2	(Alt name: NM_033070) Cat eye syndrome critical region protein 5 precursor.	chr22-15998410	-587
NM_020409	RM47_HUMAN	39S ribosomal protein L47, mitochondrial precursor (L47mt) (MRP-L47).	chr3-180788950	-927
NM_152707	GDC_HUMAN	Grave disease carrier protein (GDC) (Grave disease autoantigen) (GDA) (Mitochondrial solute carrier protein homolog).	chr10-69912103	-699

## Sheet: Non-Mito_Genes
Gene/Protein name	Common Name	Description	Gene_position	MURE1-CHOP-TTF1 Offset
NM_000073	CD3G_HUMAN	T-cell surface glycoprotein CD3 gamma chain precursor (T-cell receptor T3 gamma chain).	chr11+117720310	-586
NM_000080	ACHE_HUMAN	Acetylcholine receptor protein, epsilon subunit precursor.	chr17-4741839	-892
NM_000211	ITB2_HUMAN	Integrin beta-2 precursor (Cell surface adhesion glycoproteins LFA- 1/CR3/p150,95 beta-subunit) (CD18) (Complement receptor C3 beta- subunit).	chr21-45130313	-941
NM_000536	RAG2_HUMAN	V(D)J recombination-activating protein 2 (RAG-2).	chr11-36570070	-866
NM_000873	ICAM2_HUMAN	Intercellular adhesion molecule 2 precursor (ICAM-2) (CD102 antigen).	chr17-59433687	-623
NM_001988	EVPL_HUMAN	Envoplakin (210 kDa paraneoplastic pemphigus antigen) (p210) (210 kDa cornified envelope precursor protein).	chr17-71514521	-651
NM_001991	EZH1_HUMAN	Enhancer of zeste homolog 1 (ENX-2).	chr17-38105819	-723
NM_002134	HMOX2_HUMAN	Heme oxygenase 2 (EC 1.14.99.3) (HO-2).	chr16+4466446	-597
NM_002791	PSA6_HUMAN	Proteasome subunit alpha type 6 (EC 3.4.25.1) (Proteasome iota chain) (Macropain iota chain) (Multicatalytic endopeptidase complex iota chain) (27 kDa prosomal protein) (PROS-27) (p27K).	chr14+34831324	-636
NM_003116	SPAG4_HUMAN	Sperm-associated antigen 4 protein (Outer dense fiber-associated protein SPAG4).	chr20+33667222	-566
NM_003460	ZP2_HUMAN	Zona pellucida sperm-binding protein 2 precursor (Zona pellucida glycoprotein ZP2) (Zona pellucida protein A).	chr16-21116273	-489
NM_003635	HSST2_HUMAN	Heparin sulfate N-deacetylase/N-sulfotransferase (EC 2.8.2.-) (N-HSST) (N-heparin sulfate sulfotransferase) (Glucosaminyl N-deacetylase/N- sulfotransferase).	chr10-75231674	-619
NM_004488	GPV_HUMAN	Platelet glycoprotein V precursor (GPV) (CD42D).	chr3-195595348	-410
NM_005626	SFRS4_HUMAN	Splicing factor, arginine/serine-rich 4 (Pre-mRNA splicing factor SRP75) (SRP001LB).	chr1-29346951	-803
NM_006753	SURF6_HUMAN	Surfeit locus protein 6.	chr9-135187373	-707
NM_006799	TEST_HUMAN	Testisin precursor (EC 3.4.21.-) (Eosinophil serine protease 1) (ESP- 1).	chr16+2807164	-526
NM_006951	TAF5_HUMAN	Transcription initiation factor TFIID subunit 5 (Transcription initiation factor TFIID 100 kDa subunit) (TAF(II)100) (TAFII-100) (TAFII100).	chr10+105117713	-796
NM_014160	MKRN2_HUMAN	Makorin-2 (RING finger protein 62).	chr3+12573593	-835
NM_015438	Q7Z5X4_HUMAN	Intermediate filament-like protein MGC:2625, isoform 1.	chr12-6518966	-383
NM_018416	FOXJ2_HUMAN	Forkhead box protein J2 (Fork head homologous X).	chr12+8076625	-915
X91141	RABE1_HUMAN	Rab GTPase binding effector protein 1 (Rabaptin-5) (Rabaptin-5alpha) (Rabaptin-4).	0.chr17+5126316	-903
