# Supplementary material for: Discovery of Genes Activated by the Mitochondrial Unfolded Protein Response (mtUPR) and Cognate Promoter Elements
Source: PLoS One. 2007 Sep 12;2(9):e874. doi: 10.1371/journal.pone.0000874 (PMC1964532; doi:10.1371/journal.pone.0000874)
Supplement: Data S2 — A list of "independent" genes and related original gene records used in the search algorithm (5.81 MB XLS) [file pone.0000874.s003.xls]

## Sheet: Independent_Genes
Table of Independent Genes and associated original genes and their descriptions.
Original data downloaded from http://genome.ucsc.edu/ ref: Kent, W.J., Sugnet, C. W., Furey, T. S., Roskin, K.M., Pringle, T. H., Zahler, A. M., and Haussler, D. The Human Genome Browser at UCSC. Genome Res. 12(6), 996-1006 (2002).
Independent Gene	Original Gene	Original Gene Description	Original Gene Location
BC073913	BC073913	MGC52000 protein.	chr1 4268
AF346307	AF346307	Hypothetical protein F379.	chr1 24416
NM_001005484	NM_001005484	Olfactory receptor 4F5.	chr1 58953
AK097327	AK097327	Hypothetical protein FLJ40008.	chr1 742613
NM_024796	NM_024796	Hypothetical protein FLJ22639.	chr1 751451
AK096928	AK096928	Hypothetical protein FLJ39609.	chr1 842817
NM_152486	NM_152486	Novel protein (Fragment).	chr1 850983
BC024295	BC024295	SAMD11 protein.	chr1 861008
BC033213	AK054643	SAMD11 protein.	chr1 864515
BC033213	BC033213	SAMD11 protein.	chr1 864552
NM_015658	AK022756	Hypothetical protein FLJ12694.	chr1 869446
NM_015658	AK092491	Hypothetical protein FLJ35172.	chr1 869446
NM_015658	BC003555	Hypothetical protein FLJ12694.	chr1 869458
NM_015658	NM_015658	Nucleolar complex protein 2 homolog (NOC2 protein homolog).	chr1 869458
NM_198317	NM_198317	Kelch-like protein 17 (Actinfilin).	chr1 885829
BC045768	BC045768	KLHL17 protein.	chr1 886691
NM_032129	NM_032129	Hypothetical protein DKFZp434H2010.	chr1 891739
NM_032129	BC101386	PLEKHN1 protein.	chr1 891744
NM_032129	BC101387	PLEKHN1 protein.	chr1 891744
AK123855	AK123855	Hypothetical protein FLJ41861.	chr1 900446
AK123855	BC006300	C1orf170 protein.	chr1 900447
NM_021170	NM_021170	Transcription factor HES-4 (Hairy and enhancer of split 4) (bHLH factor Hes4).	chr1 924207
NM_005101	NM_005101	Interferon-induced 17 kDa protein precursor [Contains: Ubiquitin cross-reactive protein (Interferon-induced 15 kDa protein)].	chr1 938741
NM_198576	AB191264	Agrin.	chr1 945365
NM_198576	NM_198576	Agrin precursor.	chr1 945365
AK128761	AK128761	Hypothetical protein FLJ45064.	chr1 977228
NM_017891	AK057368	Novel protein.	chr1 1007060
NM_017891	AK000591	Hypothetical protein FLJ42060.	chr1 1007067
NM_017891	AK128271	Hypothetical protein FLJ46577.	chr1 1007067
NM_017891	AY358490	Novel protein (Fragment).	chr1 1007067
NM_017891	BC008788	Hypothetical protein FLJ42060.	chr1 1007067
NM_017891	BC008788	Hypothetical protein FLJ42060.	chr1 1007067
NM_017891	NM_017891	Hypothetical protein FLJ46577.	chr1 1007067
BC028173	BC028173	Novel protein.	chr1 1007483
AK125828	AK125828	Hypothetical protein FLJ43840.	chr1 1098298
AK125828	AK128833	Hypothetical protein FLJ46328.	chr1 1098298
AK124125	AK124125	Hypothetical protein FLJ42131.	chr1 1099148
AK124125	AK124125	Novel protein.	chr1 1099148
NM_153254	NM_153254	Hypothetical protein FLJ36119.	chr1 1104939
NM_004195	NM_004195	Tumor necrosis factor receptor superfamily member 18 precursor (Glucocorticoid-induced TNFR-related protein) (Activation-inducible TNFR family receptor).	chr1 1128751
NM_004195	NM_148901	Tumor necrosis factor receptor superfamily, member 18.	chr1 1128751
NM_004195	NM_148902	Tumor necrosis factor receptor superfamily, member 18.	chr1 1128751
NM_003327	NM_003327	Tumor necrosis factor receptor superfamily member 4 precursor (OX40L receptor) (ACT35 antigen) (TAX transcriptionally-activated glycoprotein 1 receptor) (CD134 antigen).	chr1 1136569
NM_016176	BC022375	Hypothetical protein FLJ14371.	chr1 1142151
NM_016176	NM_016176	45 kDa calcium-binding protein precursor (Cab45) (Stromal cell-derived factor 4) (SDF-4).	chr1 1142151
NM_016176	AK222521	Hypothetical protein FLJ14371.	chr1 1142160
NM_016176	AK222521	45 kDa calcium-binding protein precursor (Cab45) (Stromal cell-derived factor 4) (SDF-4).	chr1 1142160
NM_016176	AF153686	Calcium binding protein.	chr1 1142176
NM_016176	NM_016547	45 kDa calcium-binding protein precursor (Cab45) (Stromal cell-derived factor 4) (SDF-4).	chr1 1142176
NM_080605	NM_080605	Beta-1,3-galactosyltransferase 6 (EC 2.4.1.134) (beta 3GalT6) (Galactosylxylosylprotein 3-beta-galactosyltransferase) (UDP- Gal:betaGal beta 1,3-galactosyltransferase polypeptide 6) (Galactosyltransferase II) (GAG GalTII).	chr1 1157507
BC089443	BC089443	C1QDC2 protein.	chr1 1167695
NM_058167	AK056065	Ubiquitin-conjugating enzyme E2, J2 (UBC6 homolog, yeast) (Fragment).	chr1 1179156
NM_058167	BC094777	PRO2121.	chr1 1179156
NM_058167	NM_058167	Ubiquitin-conjugating enzyme E2 J2 (EC 6.3.2.19) (Non-canonical ubiquitin-conjugating enzyme 2) (NCUBE2).	chr1 1179156
NM_058167	NM_194315	Ubiquitin-conjugating enzyme E2 J2 (EC 6.3.2.19) (Non-canonical ubiquitin-conjugating enzyme 2) (NCUBE2).	chr1 1179156
AK125883	AK125883	Hypothetical protein FLJ43895.	chr1 1183300
AK094155	AK094155	Hypothetical protein FLJ36836.	chr1 1183465
AK093239	AK093239	Sodium channel, nonvoltage-gated 1, delta.	chr1 1207351
NM_002978	NM_002978	Amiloride-sensitive sodium channel delta-subunit (Epithelial Na+ channel delta subunit) (Delta ENaC) (Nonvoltage-gated sodium channel 1 delta subunit) (SCNED) (Delta NaCH).	chr1 1207438
BC051194	BC051194	Centaurin, beta 5.	chr1 1217634
BC051194	BC051194	Centaurin-beta 5 (Cnt-b5).	chr1 1217634
BC051194	BC051194	Centaurin-beta 5 (Cnt-b5).	chr1 1217634
AK093954	AK093954	Centaurin, beta 5 (Fragment).	chr1 1218113
NM_030649	NM_030649	Centaurin-beta 5 (Cnt-b5).	chr1 1218806
NM_153339	NM_153339	tRNA pseudouridine synthase-like 1 (EC 5.4.99.-) (tRNA-uridine isomerase-like 1) (tRNA pseudouridylate synthase-like 1).	chr1 1233856
NM_017871	NM_017871	Novel protein (Fragment).	chr1 1236843
NM_017871	AK021939	Hypothetical protein FLJ11877.	chr1 1236848
NM_017871	AK023356	CPSF3L protein.	chr1 1236848
NM_017871	AK123641	Hypothetical protein FLJ41647.	chr1 1236848
NM_001029885	NM_001029885	MGC10334 protein (Fragment).	chr1 1250005
BC004366	BC004366	MGC10334 protein.	chr1 1252935
NM_004421	AK093189	Hypothetical protein FLJ35870.	chr1 1260521
NM_004421	NM_004421	Segment polarity protein dishevelled homolog DVL-1 (Dishevelled-1) (DSH homolog 1).	chr1 1260521
NM_004421	NM_181870	Hypothetical protein FLJ35870.	chr1 1260521
NM_004421	NM_182779	Dishevelled 1, isoform c.	chr1 1260521
U46461	U46461	Segment polarity protein dishevelled homolog DVL-1-like (Dishevelled- 1-like) (DSH homolog 1-like).	chr1 1261363
NM_032348	AK027269	Hypothetical protein FLJ14363.	chr1 1277934
NM_032348	AK095966	Novel protein.	chr1 1277934
NM_032348	NM_032348	Matrix-remodelling associated 8 (Limitrin) (Novel protein).	chr1 1277934
NM_017900	NM_017900	Aurora kinase A-interacting protein (AURKA-interacting protein).	chr1 1298972
AK074112	AY037150	Cyclin-L2 (Paneth cell-enhanced expression protein).	chr1 1311738
AK074112	AK074112	n/a	chr1 1311741
AK056120	AK056120	n/a	chr1 1311950
AY116620	AY116620	Cyclin-L2 (Paneth cell-enhanced expression protein).	chr1 1312474
NM_017971	AK000886	Hypothetical protein FLJ10024.	chr1 1327155
NM_017971	NM_017971	Mitochondrial ribosomal protein L20 (L20mt) (MRPL20 protein). 50S ribosomal protein L20.	chr1 1327159
NM_022834	NM_022834	Von Willebrand factor A domain-related protein, isoform 1 (WARP).	chr1 1360771
NM_022834	NM_199121	VWA1 protein (Fragment).	chr1 1360771
NM_031921	NM_031921	ATPase family AAA domain containing protein 3B.	chr1 1397026
NM_031921	BC018701	Hypothetical protein FLJ13966.	chr1 1397071
NM_018188	BC014101	ATPase family, AAA domain containing 3A (Fragment).	chr1 1437395
NM_018188	NM_018188	ATPase family AAA domain containing protein 3A.	chr1 1437417
NM_014188	BC008070	Hypothetical protein FLJ45206.	chr1 1466916
NM_014188	BC008070	Novel protein (HSPC182).	chr1 1466916
NM_014188	NM_014188	Novel protein (HSPC182).	chr1 1466916
AK023110	AK023110	PRO0764.	chr1 1487594
NM_080875	BC037542	n/a	chr1 1540735
NM_080875	AB076692	n/a	chr1 1540746
NM_080875	AB076693	Ubiquitin ligase protein MIB2 (EC 6.3.2.-) (Mind bomb homolog 2) (Zinc finger ZZ type with ankyrin repeat domain protein 1) (Skeletrophin) (Novelzin) (Novel zinc finger protein) (Putative NF-kappa-B-activating protein 002N).	chr1 1540746
NM_080875	NM_080875	Ubiquitin ligase protein MIB2 (EC 6.3.2.-) (Mind bomb homolog 2) (Zinc finger ZZ type with ankyrin repeat domain protein 1) (Skeletrophin) (Novelzin) (Novel zinc finger protein) (Putative NF-kappa-B-activating protein 002N).	chr1 1540746
NM_080875	AK123400	Hypothetical protein FLJ41406.	chr1 1540758
NM_080875	AB097000	Hypothetical protein FLJ25919.	chr1 1540781
AK098785	AK098785	Hypothetical protein FLJ25919.	chr1 1541260
NM_006983	AB010962	MIFR-2.	chr1 1557420
NM_006983	NM_006983	Matrix metalloproteinase 23B (Fragment).	chr1 1557422
AK000081	AK000081	n/a	chr1 1560812
AK000081	AK000081	n/a	chr1 1560812
NM_001787	NM_001787	PITSLRE serine/threonine-protein kinase CDC2L1 (EC 2.7.1.37) (Galactosyltransferase-associated protein kinase p58/GTA) (Cell division cycle 2-like protein kinase 1) (CLK-1) (CDK11) (p58 CLK-1).	chr1 1560962
NM_001787	NM_033486	Cell division cycle 2-like 2 (PITSLRE proteins) (Fragment).	chr1 1560962
NM_001787	NM_033488	CDC2L1 protein (Fragment).	chr1 1560962
NM_001787	NM_033489	CDC2L1 protein (Fragment).	chr1 1560962
NM_001787	NM_033490	CDC2L1 protein (Fragment).	chr1 1560962
NM_001787	NM_033492	Cell division cycle 2-like 2 (PITSLRE proteins) (Fragment).	chr1 1560962
NM_001787	NM_033493	Cell division cycle 2-like 2 (PITSLRE proteins) (Fragment).	chr1 1560962
NM_001787	U04816	Cell division cycle 2-like 2 (PITSLRE proteins) (Fragment).	chr1 1560962
NM_001787	U04817	Cell division cycle 2-like 2 (PITSLRE proteins) (Fragment).	chr1 1560962
NM_001787	U04818	Cell division cycle 2-like 2 (PITSLRE proteins) (Fragment).	chr1 1560962
NM_001787	U04824	n/a	chr1 1560962
NM_001787	U04824	Cell division cycle 2-like 2 (PITSLRE proteins) (Fragment).	chr1 1560962
BC110653	BC110653	Solute carrier family 35, member E2 (Fragment).	chr1 1585592
BC092507	BC092507	SLC35E2 protein.	chr1 1591741
AB209095	AB209095	Cell division cycle 2-like 2 isoform 4 variant (Fragment).	chr1 1624034
NM_033528	AF067523	Cell division cycle 2-like 2 (PITSLRE proteins) (Fragment).	chr1 1624179
NM_033528	AF067525	Hypothetical protein (Fragment).	chr1 1624179
NM_033528	NM_033528	Cell division cycle 2-like 2 (PITSLRE proteins) (Fragment).	chr1 1624179
NM_033528	NM_033529	Cell division cycle 2-like 2 (PITSLRE proteins) (Fragment).	chr1 1624179
NM_033528	NM_033531	PITSLRE serine/threonine-protein kinase CDC2L2 (EC 2.7.1.37) (Galactosyltransferase-associated protein kinase p58/GTA) (Cell division cycle 2-like protein kinase 2) (CDK11).	chr1 1624179
NM_033528	NM_033536	Cell division cycle 2-like 2 (PITSLRE proteins) (Fragment).	chr1 1624179
NM_033528	NM_033537	Cell division cycle 2-like 2 (PITSLRE proteins) (Fragment).	chr1 1624179
BC062371	BC062371	Solute carrier family 35, member E2.	chr1 1646138
NM_182838	NM_182838	Solute carrier family 35, member E2 (Fragment).	chr1 1653540
NM_023018	AF250320	NAD kinase (EC 2.7.1.23) (Poly(P)/ATP NAD kinase).	chr1 1672537
NM_023018	NM_023018	NAD kinase (EC 2.7.1.23) (Poly(P)/ATP NAD kinase).	chr1 1672537
NM_002074	NM_002074	Guanine nucleotide-binding protein G(I)/G(S)/G(T) beta subunit 1 (Transducin beta chain 1).	chr1 1706589
NM_138705	NM_138705	Calmodulin-like protein 6 (Calglandulin-like protein).	chr1 1836125
NM_178545	AY358544	ERHC3048.	chr1 1838888
NM_178545	NM_178545	Muscle protein (Novel protein).	chr1 1838889
NM_001003808	NM_001003808	Hypothetical protein DKFZp434B1120.	chr1 1843256
AK094642	AK094642	Hypothetical protein FLJ37323.	chr1 1862044
AK127388	AK127388	Hypothetical protein FLJ45476.	chr1 1904969
NM_000815	NM_000815	Gamma-aminobutyric-acid receptor delta subunit precursor (GABA(A) receptor).	chr1 1940702
NM_002744	NM_002744	Protein kinase C, zeta type (EC 2.7.1.37) (nPKC-zeta).	chr1 1971768
Z15108	Z15108	Protein kinase C, zeta type (EC 2.7.1.37) (nPKC-zeta).	chr1 1971947
BC028413	BC028413	Hypothetical protein.	chr1 2062385
AK024190	AK024190	Hypothetical protein FLJ10346.	chr1 2103092
NM_182533	AK127994	Hypothetical protein FLJ46112 (Novel protein).	chr1 2105762
NM_182533	AF469129	Hypothetical protein.	chr1 2105776
NM_182533	NM_182533	Hypothetical protein FLJ31031 (Hypothetical protein C1orf86).	chr1 2105776
AF461903	AF461903	Hypothetical protein FP7162.	chr1 2110849
AF461903	AK126870	Hypothetical protein FLJ44922.	chr1 2110849
AK093927	AK093927	Hypothetical protein FLJ36608.	chr1 2111096
AK024162	AK024162	Hypothetical protein FLJ14100.	chr1 2133219
NM_003036	NM_003036	Ski oncogene (C-ski).	chr1 2149993
NM_024848	NM_024848	Hypothetical protein FLJ13941 (Novel protein).	chr1 2242555
BC065369	BC065369	Hypothetical protein.	chr1 2271715
BC021704	BC021704	FLJ13941 protein.	chr1 2276475
AK128431	AK128431	Hypothetical protein FLJ46574.	chr1 2296154
AF091071	BC004965	RER1 protein.	chr1 2313138
AF091071	AF091071	RER1 homolog (S. cerevisiae).	chr1 2313188
NM_002617	NM_002617	Peroxisome assembly protein 10 (Peroxin-10) (RING finger protein 69).	chr1 2326102
NM_002617	NM_153818	Peroxisome assembly protein 10 (Peroxin-10) (RING finger protein 69).	chr1 2326102
NM_002617	CR599184	Peroxisome assembly protein 10 (Peroxin-10) (RING finger protein 69).	chr1 2326137
AK122591	AK122591	Novel protein.	chr1 2347278
NM_014638	DQ176850	Novel protein.	chr1 2397613
NM_014638	NM_014638	Phospholipase C-eta2.	chr1 2397613
AK122589	AK122589	Novel protein.	chr1 2400388
BC043358	BC043358	Novel protein.	chr1 2401186
NM_018216	NM_018216	Pantothenate kinase 4 (EC 2.7.1.33) (Pantothenic acid kinase 4) (hPanK4).	chr1 2429834
NM_001010926	BC087840	HES5 protein.	chr1 2450045
NM_001010926	NM_001010926	Hairy and enhancer of split 5 (Drosophila) (HES5).	chr1 2450045
AK130172	AK130172	Hypothetical protein FLJ26662.	chr1 2477367
NM_003820	AK124010	TNFRSF14 protein.	chr1 2479152
NM_003820	NM_003820	Tumor necrosis factor receptor superfamily member 14 precursor (Herpesvirus entry mediator A) (Tumor necrosis factor receptor-like 2) (TR2).	chr1 2479152
NM_152371	AK075273	Hypothetical protein FLJ90792 (Novel protein) (MGC26818).	chr1 2508096
NM_152371	NM_152371	Hypothetical protein FLJ90792 (Novel protein) (MGC26818).	chr1 2508108
NM_152371	AK057027	Hypothetical protein C1orf93 (Novel protein) (MGC26818).	chr1 2508117
NM_033467	NM_033467	Mel transforming oncogene-like 1 (MELL1 protein).	chr1 2511940
BC101027	BC101027	Mel transforming oncogene-like 1 (MELL1 protein).	chr1 2512224
BC101027	BC101028	MELL1 protein.	chr1 2512224
BC101027	BC101029	MELL1 protein.	chr1 2512224
NM_080431	NM_080431	Actin-related protein M2 (Actin-related protein T2) (ARP-T2).	chr1 2927905
AL832943	AL832943	Hypothetical protein FLJ42875.	chr1 2966040
BC029785	BC029785	FLJ42875 protein.	chr1 2970495
NM_022114	NM_022114	PR-domain zinc finger protein 16 (Transcription factor MEL1).	chr1 2975603
NM_022114	NM_199454	PR domain containing 16.	chr1 2975603
NM_022114	AF294278	PR-domain zinc finger protein 16 (Transcription factor MEL1).	chr1 2975620
NM_022114	AB078876	PR domain containing 16.	chr1 2975639
NM_022114	AB051462	PR-domain zinc finger protein 16 (Transcription factor MEL1).	chr1 2975651
CR609468	CR609468	Rho guanine exchange factor (GEF) 16.	chr1 3361016
NM_014448	NM_014448	Neuroblastoma (Rho guanine exchange factor (GEF) 16) (Rho guanine exchange factor 16).	chr1 3369981
AB011539	AB011539	Multiple EGF-like-domain protein 3 precursor (Multiple epidermal growth factor-like domains 6).	chr1 3396343
NM_182752	NM_182752	Novel protein.	chr1 3531415
BC019034	BC019034	FAM79A protein (Novel protein).	chr1 3531473
NM_017818	BC002611	WD-repeat protein 8.	chr1 3537197
NM_017818	NM_017818	WD-repeat protein 8.	chr1 3537199
NM_005427	NM_005427	Tumor protein p73 (p53-like transcription factor) (p53-related protein).	chr1 3558988
BC111984	BC111984	Hypothetical protein DKFZp434N0450 (Hypothetical protein KIAA0495).	chr1 3649542
NM_152492	NM_152492	Hypothetical protein FLJ32825.	chr1 3658821
NM_020710	NM_020710	Hypothetical protein LRRC47 (Novel protein).	chr1 3686643
NM_014704	NM_014704	Protein KIAA0562.	chr1 3718512
BC047450	BC047450	Glycine-, glutamate-, thienylcyclohexylpiperidine-binding protein (Fragment).	chr1 3740095
NM_001004285	NM_001004285	DNAation factor B truncated form III.	chr1 3763704
NM_001004285	NM_001004286	DNAation factor B truncated form III.	chr1 3763704
NM_001004285	NM_004402	DNA fragmentation factor 40 kDa subunit (EC 3.-.-.-) (DFF-40) (Caspase-activated deoxyribonuclease) (Caspase-activated DNase) (CAD) (Caspase-activated nuclease) (CPAN).	chr1 3763704
AB028911	AB028911	DNA fragmentation factor 40 kDa subunit (EC 3.-.-.-) (DFF-40) (Caspase-activated deoxyribonuclease) (Caspase-activated DNase) (CAD) (Caspase-activated nuclease) (CPAN).	chr1 3763896
AB028911	AB028912	DNA fragmentation factor 40 kDa subunit (EC 3.-.-.-) (DFF-40) (Caspase-activated deoxyribonuclease) (Caspase-activated DNase) (CAD) (Caspase-activated nuclease) (CPAN).	chr1 3763896
AB028911	AB028912	DNAation factor, 40kDa, beta polypeptide (Caspase-activated DNase).	chr1 3763896
AB028911	AB028913	DNA fragmentation factor 40 kDa subunit (EC 3.-.-.-) (DFF-40) (Caspase-activated deoxyribonuclease) (Caspase-activated DNase) (CAD) (Caspase-activated nuclease) (CPAN).	chr1 3763896
AY438267	AF409060	DNA fragmentation factor 40 kDa subunit (EC 3.-.-.-) (DFF-40) (Caspase-activated deoxyribonuclease) (Caspase-activated DNase) (CAD) (Caspase-activated nuclease) (CPAN).	chr1 3764023
AY438267	AY438267	DNAation factor B truncated form III.	chr1 3764027
AY438267	AY438268	DNAation factor B truncated form III.	chr1 3764027
NM_207356	NM_207356	Hypothetical protein LOC339448.	chr1 3795562
AF175409	AF175409	Hypothetical protein MOT8 (Transmembrane protein SHREW1).	chr1 4614651
AF175409	AF175409	Hypothetical protein.	chr1 4614651
NM_015102	NM_015102	Nephrocystin-4 (Nephroretinin).	chr1 5845456
NM_015102	AK127333	Hypothetical protein FLJ45404 (Nephronophthisis 4).	chr1 5845457
NM_015102	BC028627	NPHP4 protein.	chr1 5845457
NM_015102	BC040520	Nephrocystin-4 (Nephroretinin).	chr1 5845459
AL117405	AL117405	Nephronophthisis 4.	chr1 5869143
NM_003636	BC110351	Hypothetical protein.	chr1 6008966
NM_003636	NM_003636	Voltage-gated potassium channel beta-2 subunit (K(+) channel beta-2 subunit) (Kv-beta-2) (HKvbeta2).	chr1 6008966
NM_003636	NM_172130	Potassium voltage-gated channel, shaker-related subfamily, beta member 2 (Fragment).	chr1 6008966
AK131252	AK131252	Hypothetical protein FLJ16180.	chr1 6028567
NM_015557	NM_015557	Chromodomain helicase-DNA-binding protein 5 (EC 3.6.1.-) (ATP- dependent helicase CHD5) (CHD-5).	chr1 6084439
AK127046	AK126012	Hypothetical protein FLJ44024.	chr1 6087729
AK127046	AK126012	Chromodomain helicase DNA binding protein 5.	chr1 6087729
AK127046	AK127046	Hypothetical protein FLJ45103.	chr1 6087737
AK094219	AK094219	Hypothetical protein FLJ36900.	chr1 6159758
NM_000983	NM_000983	60S ribosomal protein L22 (Epstein-Barr virus small RNA associated protein) (EBER associated protein) (EAP) (Heparin binding protein HBp15).	chr1 6167667
NM_207396	AK128246	Novel protein.	chr1 6188121
NM_207396	NM_207396	Hypothetical protein FLJ46380.	chr1 6188121
BC034459	BC034459	Novel protein.	chr1 6191264
NM_173795	NM_173795	Hypothetical protein FLJ32096.	chr1 6191506
AK127700	AK127700	Hypothetical protein FLJ45800 (Novel protein).	chr1 6194575
AK128450	AK128450	Hypothetical protein FLJ46593.	chr1 6199692
AF173157	AF173157	MSTP098.	chr1 6203841
BC017037	BC017037	Protein-S-isoprenylcysteine O-methyltransferase (EC 2.1.1.100) (Isoprenylcysteine carboxylmethyltransferase) (Prenylcysteine carboxyl methyltransferase) (pcCMT) (Prenylated protein carboxyl methyltransferase) (PPMT).	chr1 6206138
BC017037	BC028168	Protein-S-isoprenylcysteine O-methyltransferase (EC 2.1.1.100) (Isoprenylcysteine carboxylmethyltransferase) (Prenylcysteine carboxyl methyltransferase) (pcCMT) (Prenylated protein carboxyl methyltransferase) (PPMT).	chr1 6206138
NM_153709	NM_153709	Hypothetical protein MGC40168.	chr1 6220457
NM_001024598	NM_001024598	Novel protein, possible ortholog of rodent transcription factor HES-3 (Fragment).	chr1 6226231
NM_207370	NM_207370	Probable G-protein coupled receptor 153 (G-protein coupled receptor PGR1).	chr1 6231442
NM_007274	AB074415	Brain acyl-CoA hydrolase (BACH).	chr1 6246919
NM_007274	AB074416	Brain acyl-CoA hydrolase (BACH).	chr1 6246919
NM_007274	BC017365	Brain acyl-CoA hydrolase.	chr1 6246919
NM_007274	NM_007274	Brain acyl-CoA hydrolase.	chr1 6246919
NM_007274	NM_181862	Brain acyl-CoA hydrolase (BACH).	chr1 6246919
NM_007274	NM_181863	Brain acyl-CoA hydrolase (BACH).	chr1 6246919
NM_007274	NM_181864	Cytosolic acyl coenzyme A thioester hydrolase (EC 3.1.2.2) (Long chain acyl-CoA thioester hydrolase) (CTE-II) (CTE-IIa) (Brain acyl-CoA hydrolase) (Acyl-CoA thioesterase 7).	chr1 6246919
NM_007274	NM_181865	Brain acyl-CoA hydrolase (BACH).	chr1 6246919
NM_007274	NM_181866	Brain acyl-CoA hydrolase (BACH).	chr1 6246919
AY358179	AY358179	GSQS6193.	chr1 6249418
NM_019089	NM_019089	Transcription factor HES-2 (Hairy and enhancer of split 2).	chr1 6397882
NM_031475	NM_031475	Espin (Fragment).	chr1 6407434
AY203958	AY203958	LP2654.	chr1 6430689
NM_003790	NM_003790	Tumor necrosis factor receptor superfamily member 25 precursor (WSL-1 protein) (Apoptosis-mediating receptor DR3) (Apoptosis-mediating receptor TRAMP) (Death domain receptor 3) (WSL protein) (Apoptosis- inducing receptor AIR) (Apo-3) (Lymphocyte associate	chr1 6443807
NM_003790	NM_148965	Tumor necrosis factor receptor superfamily member 25 precursor (WSL-1 protein) (Apoptosis-mediating receptor DR3) (Apoptosis-mediating receptor TRAMP) (Death domain receptor 3) (WSL protein) (Apoptosis- inducing receptor AIR) (Apo-3) (Lymphocyte associate	chr1 6443807
NM_003790	NM_148966	Tumor necrosis factor receptor superfamily, member 25 (Fragment).	chr1 6443807
NM_003790	NM_148967	Tumor necrosis factor receptor superfamily, member 25 (Fragment).	chr1 6443807
NM_003790	NM_148968	Tumor necrosis factor receptor superfamily, member 25 (Fragment).	chr1 6443807
NM_003790	NM_148969	Tumor necrosis factor receptor superfamily, member 25 (Fragment).	chr1 6443807
NM_003790	NM_148971	Tumor necrosis factor receptor superfamily, member 25 (Fragment).	chr1 6443807
NM_003790	NM_148972	Tumor necrosis factor receptor superfamily, member 25 (Fragment).	chr1 6443807
AB018263	AB018263	Novel PH domain-containing protein.	chr1 6448738
NM_020631	NM_020631	Novel PH domain-containing protein.	chr1 6449459
NM_020631	NM_198681	Novel PH domain-containing protein.	chr1 6449459
AK096347	AK096347	Novel PH domain-containing protein.	chr1 6449769
AK096347	BC042606	Putative NFkB activating protein.	chr1 6449769
AK096347	BC042606	Novel PH domain-containing protein.	chr1 6449769
AK096347	BC015231	PLEKHG5 protein (Novel PH domain-containing protein).	chr1 6449772
NM_024654	NM_024654	Nucleolar protein 9.	chr1 6507796
NM_138697	NM_138697	Taste receptor type 1 member 1 precursor (G-protein coupled receptor 70) (Gm148).	chr1 6538020
NM_138697	NM_177539	Taste receptor, type 1, member 1 (Fragment).	chr1 6538020
NM_138697	NM_177540	Taste receptor, type 1, member 1 (Fragment).	chr1 6538020
NM_138697	NM_177541	Taste receptor, type 1, member 1 (Fragment).	chr1 6538020
AF387618	AF387618	Taste receptor type 1 member 1 precursor (G-protein coupled receptor 70) (Gm148).	chr1 6553555
NM_005341	NM_005341	Krueppel-related zinc finger protein 3 (HKR3 protein).	chr1 6562697
BC013573	BC013573	HKR3 protein.	chr1 6563194
NM_014851	AB007938	Kelch-like protein 21.	chr1 6573365
NM_014851	NM_014851	Kelch-like protein 21.	chr1 6573371
NM_153812	NM_153812	PHD finger protein 13.	chr1 6596331
BC092427	BC092427	THAP domain-containing protein 3.	chr1 6607511
CR601567	CR601567	THAP domain-containing protein 3.	chr1 6607827
NM_018198	AL109978	DnaJ (Hsp40) homolog, subfamily C, member 11 (Fragment).	chr1 6616815
NM_018198	NM_018198	Hypothetical protein FLJ10737.	chr1 6616817
AY336749	BC014145	DNAJC11 protein (DnaJ (Hsp40) homolog, subfamily C, member 11).	chr1 6617762
AY336749	AY336749	DNAJ domain-containing protein.	chr1 6617769
NM_015215	NM_015215	Calmodulin binding transcription activator 1.	chr1 6767970
AY037153	AY037153	Hypothetical protein.	chr1 6768156
AK128074	AK128074	Hypothetical protein FLJ46195.	chr1 7367754
BC051341	BC051341	CAMTA1 protein (Fragment).	chr1 7719054
BC051341	BC051341	MSTP023.	chr1 7719054
AF111804	AF111804	MSTP023.	chr1 7727560
NM_004781	NM_004781	Vesicle-associated membrane protein 3 (VAMP-3) (Synaptobrevin-3) (Cellubrevin) (CEB).	chr1 7753915
BC026102	BC026102	PER3 protein (Period homolog 3) (Drosophila).	chr1 7766966
NM_016831	AB047686	Period circadian protein 3 (hPER3).	chr1 7767300
NM_016831	NM_016831	Period circadian protein 3 (hPER3).	chr1 7767349
BC025776	BC025776	Urotensin 2.	chr1 7825730
NM_006786	NM_006786	Urotensin-2 precursor (Urotensin-II) (U-II) (UII).	chr1 7830261
AK125490	AK125490	Hypothetical protein FLJ43501.	chr1 7900233
NM_001561	NM_001561	Tumor necrosis factor receptor superfamily member 9 precursor (4-1BB ligand receptor) (T-cell antigen 4-1BB homolog) (T-cell antigen ILA) (CD137 antigen).	chr1 7902494
NM_007262	NM_007262	Protein DJ-1 (Oncogene DJ1).	chr1 7944379
NM_018948	NM_018948	Mitogen-inducible gene 6 protein (Mig-6).	chr1 7994381
NM_012102	NM_012102	Arginine-glutamic acid dipeptide repeats protein (Atrophin-1-like protein) (Atrophin-1-related protein).	chr1 8335043
BC062342	BC062342	n/a	chr1 8337283
NM_001428	NM_001428	Alpha-enolase (EC 4.2.1.11) (2-phospho-D-glycerate hydro-lyase) (Non- neural enolase) (NNE) (Enolase 1) (Phosphopyruvate hydratase) (C-myc promoter-binding protein) (MBP-1) (MPB-1) (Plasminogen-binding protein).	chr1 8843649
NM_001428	BC073991	ENO1 protein (Fragment).	chr1 8843651
NM_001215	NM_001215	Carbonic anhydrase 6 precursor (EC 4.2.1.1) (Carbonic anhydrase VI) (Carbonate dehydratase VI) (CA-VI) (Secreted carbonic anhydrase) (Salivary carbonic anhydrase).	chr1 8928508
NM_001215	BC034350	CA6 protein (Carbonic anhydrase VI).	chr1 8928527
NM_207420	NM_207420	Intestinal facilitative glucose transporter 7.	chr1 8985945
NM_003039	NM_003039	Solute carrier family 2, facilitated glucose transporter member 5 (Glucose transporter type 5, small intestine) (Fructose transporter).	chr1 9019593
BC035878	BC035878	SLC2A5 protein (Solute carrier family 2 (Facilitated glucose/fructose transporter), member 5).	chr1 9022727
NM_024980	NM_024980	Probable G-protein coupled receptor 157.	chr1 9087062
NM_004285	AJ012590	GDH/6PGL endoplasmic bifunctional protein precursor [Includes: Glucose 1-dehydrogenase (EC 1.1.1.47) (Hexose-6-phosphate dehydrogenase); 6- phosphogluconolactonase (EC 3.1.1.31) (6PGL)].	chr1 9217449
NM_004285	NM_004285	GDH/6PGL endoplasmic bifunctional protein precursor [Includes: Glucose 1-dehydrogenase (EC 1.1.1.47) (Hexose-6-phosphate dehydrogenase); 6- phosphogluconolactonase (EC 3.1.1.31) (6PGL)].	chr1 9217449
CR749282	CR749282	GDH/6PGL endoplasmic bifunctional protein precursor [Includes: Glucose 1-dehydrogenase (EC 1.1.1.47) (Hexose-6-phosphate dehydrogenase); 6- phosphogluconolactonase (EC 3.1.1.31) (6PGL)].	chr1 9222489
NM_025106	NM_025106	SPRY domain-containing SOCS box protein SSB-1.	chr1 9275570
AK130055	AK130055	Hypothetical protein FLJ26545.	chr1 9350193
NM_032315	NM_032315	Mitochondrial carrier protein MGC4399 (Novel mitochondrial carrier protein).	chr1 9522144
AK130277	AK130277	Hypothetical protein FLJ26767.	chr1 9558421
NM_001010866	NM_001010866	Novel protein.	chr1 9571566
NM_005026	NM_005026	Phosphatidylinositol-4,5-bisphosphate 3-kinase catalytic subunit delta isoform (EC 2.7.1.153) (PI3-kinase p110 subunit delta) (PtdIns-3- kinase p110) (PI3K) (p110delta).	chr1 9634389
AK097325	AK097325	Hypothetical protein FLJ40006.	chr1 9635273
U57843	U57843	Phosphatidylinositol 3-kinase delta catalytic subunit.	chr1 9692842
NM_001009566	NM_001009566	Calsyntenin-1 precursor.	chr1 9711666
NM_001009566	NM_014944	Calsyntenin 1 (Fragment).	chr1 9711666
AK131225	AK131225	Hypothetical protein FLJ16126.	chr1 9808933
NM_020248	NM_020248	Beta-catenin-interacting protein 1 (Inhibitor of beta-catenin and Tcf- 4).	chr1 9830920
NM_032368	NM_032368	Leucine zipper & ICAT homologous protein LZIC (Leucine zipper and CTNNBIP1 domain containing).	chr1 9912364
AK026065	AK026065	Nicotinamide mononucleotide adenylyltransferase 1 (EC 2.7.7.1) (NMN adenylyltransferase 1).	chr1 9926094
NM_052960	NM_052960	Retinoid-binding protein 7 (Cellular retinoic acid-binding protein 4) (CRBP4) (Cellular retinoic acid-binding protein IV) (CRABP-IV).	chr1 9979860
NM_006048	NM_006048	Ubiquitin conjugation factor E4 B (Ubiquitin-fusion degradation protein 2) (Homozygously deleted in neuroblastoma-1).	chr1 10015629
AF043117	AF043117	Ubiquitin conjugation factor E4 B (Ubiquitin-fusion degradation protein 2) (Homozygously deleted in neuroblastoma-1).	chr1 10016240
AF043117	AF043117	n/a	chr1 10016240
NM_015074	NM_015074	Kinesin-like protein KIF1B (Klp).	chr1 10193417
NM_015074	NM_183416	Kinesin family member 1B.	chr1 10193417
AB011163	AB011163	Kinesin-like protein KIF1B (Klp).	chr1 10194260
AB040881	AB040881	Hypothetical protein FLJ13122.	chr1 10213408
AB017133	AB017133	Kinesin-like protein KIF1B (Klp).	chr1 10214892
AB088210	AB088210	Kinesin-like protein KIF1B (Klp).	chr1 10214973
AB088210	AB088211	Kinesin family member 1Bbeta isoform II.	chr1 10214973
AB088210	AB088212	Kinesin family member 1Bbeta isoform III.	chr1 10214973
AB088210	AB088213	Kinesin family member 1Bbeta isoform IV.	chr1 10214973
NM_002631	NM_002631	6-phosphogluconate dehydrogenase, decarboxylating (EC 1.1.1.44).	chr1 10381671
NM_198544	NM_198544	Hypothetical protein (Apoptosis-inducing, TAF9-like domain 1).	chr1 10412745
NM_198544	NM_199294	Apoptosis-inducing, TAF9-like domain 1, isoform A.	chr1 10412745
AF516753	AF516753	Hypothetical protein (Apoptosis-inducing, TAF9-like domain 1).	chr1 10413027
NM_001302	NM_001302	Cortistatin precursor [Contains: Cortistatin-29; Cortistatin-17].	chr1 10432557
BC040034	BC040034	Cortistatin precursor [Contains: Cortistatin-29; Cortistatin-17].	chr1 10432814
NM_004401	NM_004401	DNA fragmentation factor alpha subunit (DNA fragmentation factor 45 kDa subunit) (DFF-45) (Inhibitor of CAD) (ICAD).	chr1 10443191
NM_004401	NM_213566	DNAation factor, 45kDa, alpha polypeptide.	chr1 10443191
NM_004565	NM_004565	Peroxisomal membrane protein PEX14 (Peroxin-14) (Peroxisomal membrane anchor protein PEX14) (PTS1 receptor docking protein).	chr1 10457605
NM_001039183	NM_001039183	Hypothetical protein FLJ27486.	chr1 10619776
NM_017766	NM_017766	Probable transcription factor CST (Castor-related protein).	chr1 10629864
NM_173507	NM_173507	Hypothetical protein FLJ37118.	chr1 10929119
NM_007375	NM_007375	TAR DNA-binding protein 43 (TDP-43).	chr1 10995265
AF311304	AF311304	Hypothetical protein.	chr1 11007029
NM_006610	NM_006610	Mannan-binding lectin serine protease 2 precursor (EC 3.4.21.104) (Mannose-binding protein associated serine protease 2) (MASP-2) (MBL- associated serine protease 2) [Contains: Mannan-binding lectin serine protease 2 A chain; Mannan-binding lectin serine	chr1 11009167
NM_003132	NM_003132	Spermidine synthase (EC 2.5.1.16) (Putrescine aminopropyltransferase) (SPDSY).	chr1 11037235
NM_001001998	NM_001001998	Exosome component 10 (Polymyositis/scleroderma autoantigen 2) (Autoantigen PM/Scl 2) (Polymyositis/scleroderma autoantigen 100 kDa) (PM/Scl-100) (P100 polymyositis-scleroderma overlap syndrome associated autoantigen).	chr1 11049264
NM_001001998	NM_002685	Polymyositis/scleroderma autoantigen 2, 100kDa.	chr1 11049264
NM_004958	AB209995	FK506 binding protein 12-rapamycin associated protein 1.	chr1 11089179
NM_004958	NM_004958	FKBP12-rapamycin complex-associated protein (FK506-binding protein 12- rapamycin complex-associated protein 1) (Rapamycin target protein) (RAPT1) (Mammalian target of rapamycin) (MTOR).	chr1 11089179
NM_021146	NM_021146	Angiopoietin-related protein 7 precursor (Angiopoietin-like 7) (Angiopoietin-like factor) (Cornea-derived transcript 6 protein).	chr1 11171984
NM_013319	NM_013319	Transitional epithelia response protein (TERE1).	chr1 11255865
AL117236	AL117236	Hypothetical protein.	chr1 11484578
AL117235	AL117235	Hypothetical protein (Novel protein).	chr1 11516319
NM_012168	BC014957	F-box only protein 2.	chr1 11631032
NM_012168	NM_012168	F-box only protein 2.	chr1 11631036
NM_183412	NM_183412	n/a	chr1 11637018
NM_001014765	NM_001014765	F-box only protein 44 (F-box protein FBX30) (F-box/G-domain protein 3).	chr1 11637500
NM_018438	NM_018438	F-box only protein 6 (F-box/G-domain protein 2).	chr1 11646767
NM_006341	NM_006341	Mitotic spindle assembly checkpoint protein MAD2B (MAD2-like 2) (hREV7).	chr1 11657124
BC111064	BC111064	Novel protein.	chr1 11674365
NM_020350	BC017328	n/a	chr1 11718790
NM_020350	NM_020350	Type-1 angiotensin II receptor-associated protein (AT1 receptor- associated protein).	chr1 11718798
AL833920	AL833920	Novel protein.	chr1 11749385
AL834308	AL834308	Hypothetical protein DKFZp434F1313.	chr1 11754765
NM_005957	BC018766	MTHFR protein.	chr1 11769263
NM_005957	NM_005957	Methylenetetrahydrofolate reductase (EC 1.5.1.20).	chr1 11769263
AJ237672	AJ237672	Methylenetetrahydrofolate reductase (EC 1.5.1.20).	chr1 11773111
NM_001286	NM_001286	Chloride channel protein 6 (ClC-6).	chr1 11788880
NM_001286	NM_021735	Chloride channel 6.	chr1 11788880
NM_001286	NM_021736	Chloride channel 6.	chr1 11788880
NM_001286	NM_021737	Chloride channel 6.	chr1 11788880
NM_006172	NM_006172	Atrial natriuretic factor precursor (ANF) (Atrial natriuretic peptide) (ANP) (Prepronatriodilatin) (CDD-ANF) [Contains: Cardiodilatin-related peptide (CDP)].	chr1 11828362
NM_002521	NM_002521	Natriuretic peptides B precursor [Contains: Gamma-brain natriuretic peptide; Brain natriuretic peptide 32 (BNP-32)].	chr1 11840108
NM_138346	NM_138346	Hypothetical protein KIAA2013 (Novel protein).	chr1 11902711
AB095933	AB095933	Novel protein.	chr1 11904818
NM_000302	NM_000302	Procollagen-lysine,2-oxoglutarate 5-dioxygenase 1 precursor (EC 1.14.11.4) (Lysyl hydroxylase 1) (LH1).	chr1 11917332
AK124035	AK124035	Hypothetical protein FLJ42041.	chr1 11954186
NM_014874	NM_014874	Transmembrane GTPase MFN2 (EC 3.6.5.-) (Mitofusin-2).	chr1 11962955
NM_021933	NM_021933	Novel protein.	chr1 12002098
NM_021933	AK022500	Hypothetical protein FLJ12438.	chr1 12002109
NM_001243	NM_001243	Tumor necrosis factor receptor superfamily member 8 precursor (CD30L receptor) (Lymphocyte activation antigen CD30) (KI-1 antigen).	chr1 12046020
D86042	D86042	TNFRSF8 protein (Fragment).	chr1 12108542
NM_001066	NM_001066	Tumor necrosis factor receptor superfamily member 1B precursor (Tumor necrosis factor receptor 2) (TNF-R2) (Tumor necrosis factor receptor type II) (p75) (p80 TNF-alpha receptor) (CD120b antigen) (Etanercept) [Contains: Tumor necrosis factor receptor supe	chr1 12149646
AY148473	AY148473	P75 TNF receptor (Fragment).	chr1 12149729
NM_015378	NM_015378	Vacuolar protein sorting 13D (Yeast).	chr1 12212699
NM_015378	NM_018156	Vacuolar protein sorting 13D (Yeast) (Fragment).	chr1 12212699
AK125118	AK125118	Hypothetical protein FLJ43128.	chr1 12281924
AK001481	AK001481	Hypothetical protein FLJ10619.	chr1 12294169
NM_004753	NM_004753	Short-chain dehydrogenase/reductase 3 (EC 1.1.-.-) (Retinal short- chain dehydrogenase/reductase 1) (retSDR1) (DD83.1).	chr1 12550526
NM_001013630	NM_001013630	Novel protein similar to esterases.	chr1 12627152
AK127828	AK127828	Novel protein similar to esterases.	chr1 12698704
NM_152290	NM_152290	Hypothetical protein C1orf158.	chr1 12728749
NM_023013	NM_023013	PRAME family member 1.	chr1 12774132
BC040902	BC040902	PRAMEF2 protein.	chr1 12777426
CR599515	CR599515	Heterogeneous nuclear ribonucleoprotein C-like 1 (hnRNP core protein C-like 1).	chr1 12829644
NM_023014	NM_023014	PRAME family member 2.	chr1 12839527
NM_001009611	NM_001009611	PRAME family member 4.	chr1 12861631
BC112208	BC112208	PRAME family member 10 (Fragment).	chr1 12875313
NM_001012276	NM_001012276	PRAME family member 8.	chr1 12899036
NM_001013407	NM_001013407	PRAME family member 5.	chr1 13031100
NM_001013692	NM_001013692	PRAME family member 3.	chr1 13200782
NM_001013407	NM_001013407	PRAME family member 5.	chr1 13232405
NM_001012276	NM_001012276	PRAME family member 8.	chr1 13259235
NM_001010890	NM_001010890	PRAME family member 9.	chr1 13293762
NM_001012276	NM_001012276	PRAME family member 8.	chr1 13480020
NM_001010890	NM_001010890	PRAME family member 9.	chr1 13514559
CR622769	CR622769	Novel leucine rich repeat domain containing protein.	chr1 13674056
NM_006474	NM_006474	PA2.26 antigen precursor (Lung type-I cell membrane-associated glycoprotein) (T1A-2).	chr1 13782838
NM_006474	NM_198389	Lung type-I cell membrane-associated glycoprotein (T1A-2).	chr1 13782838
NM_006474	BC014668	Membrane glycoprotein gp36 precursor (HT1a-2) (Podoplanin) (Aggrus).	chr1 13782882
AK075345	AK075345	CDNA PSEC0025 fis, clone NT2RP1000420, highly similar to Homo sapiens lung type-I cell membrane-associated protein hT1a-2 (hT1a-2) mRNA.	chr1 13782913
BC014468	BC014468	PR domain containing 2, with ZNF domain.	chr1 13899321
NM_012231	NM_012231	PR-domain zinc finger protein 2 (Retinoblastoma protein-interacting zinc-finger protein) (Zinc finger protein RIZ) (MTE-binding protein) (MTB-ZF) (GATA-3 binding protein G3B).	chr1 13903936
NM_012231	NM_015866	PR domain containing 2, with ZNF domain (Fragment).	chr1 13903936
NM_001007257	NM_001007257	PR domain containing 2, with ZNF domain (Fragment).	chr1 13948462
AK123605	AK123605	Hypothetical protein FLJ41611.	chr1 14019048
AK124197	AK124197	Hypothetical protein FLJ42203.	chr1 14020870
AB028949	AB028949	Novel protein.	chr1 14797786
NM_001018000	BC035501	Kazrin isoform D (Kazrin isoform C).	chr1 15123212
NM_001018000	NM_001018000	Novel protein (Fragment).	chr1 15123212
AK126562	AK126562	CDNA FLJ44599 fis, clone BLADE2007735.	chr1 15198112
NM_201628	NM_201628	Hypothetical protein FLJ43806.	chr1 15300683
NM_182534	NM_182534	Hypothetical protein FLJ23703 (Novel protein).	chr1 15315035
NM_018022	NM_018022	Transmembrane protein 51.	chr1 15352815
NM_018022	BC005177	Transmembrane protein 51.	chr1 15352850
AK093883	AK093883	Novel protein (Fragment).	chr1 15544513
AK096961	AK096961	Hypothetical protein FLJ39642.	chr1 15561779
NM_024329	BC023611	EFHD2 protein.	chr1 15609027
NM_024329	NM_024329	EF-hand domain-containing protein 2 (Swiprosin-1).	chr1 15609027
NM_007272	CR749296	Hypothetical protein DKFZp779K0837.	chr1 15637524
NM_007272	NM_007272	Caldecrin precursor (EC 3.4.21.2) (Chymotrypsin C).	chr1 15637524
NM_033440	NM_033440	Elastase-2A precursor (EC 3.4.21.71).	chr1 15655810
NM_015849	NM_015849	Elastase-2B precursor (EC 3.4.21.71).	chr1 15675182
NM_001229	NM_001229	Caspase-9 precursor (EC 3.4.22.-) (CASP-9) (ICE-like apoptotic protease 6) (ICE-LAP6) (Apoptotic protease Mch-6) (Apoptotic protease- activating factor 3) (APAF-3) [Contains: Caspase-9 subunit p35; Caspase-9 subunit p10].	chr1 15691383
NM_001229	NM_032996	Caspase 9, apoptosis-related cysteine protease.	chr1 15691383
AY732490	AY732490	Caspase 9 splice variant.	chr1 15691447
AJ781267	AJ781267	Caspase-9c protein (Fragment).	chr1 15692026
NM_015291	BC047363	Hypothetical protein DKFZp686N0387 (Hypothetical protein DKFZp781I1547).	chr1 15725894
NM_015291	NM_015291	Hypothetical protein DKFZp686N0387 (Hypothetical protein DKFZp781I1547).	chr1 15725938
NM_015291	AL833299	Novel DnaJ domain-containing protein.	chr1 15725955
NM_015291	BX648982	Novel DnaJ domain-containing protein.	chr1 15725970
NM_024758	NM_024758	Agmatinase, mitochondrial precursor (EC 3.5.3.11) (Agmatine ureohydrolase) (AUH).	chr1 15771738
NM_032341	BC006011	DDI2 protein.	chr1 15816624
NM_032341	NM_032341	DNA-damage inducible protein 2 (DDI2).	chr1 15816656
BC040441	BC040441	Pleckstrin homology domain containing, family M (With RUN domain) member 2.	chr1 15883413
BC068599	BC068599	PLEKHM2 protein.	chr1 15926574
NM_207348	NM_207348	Hypothetical protein SLC25A34 (Novel mitochondrial carrier domain- containing protein similar to Mus musculus 1810012H11Rik).	chr1 15935395
NM_001013641	NM_001013641	Novel protein.	chr1 15941503
NM_017556	NM_017556	Filamin-binding LIM protein 1 (Filamin-binding LIM protein 1) (FBLP-1) (Mitogen-inducible 2 interacting protein) (MIG2-interacting protein) (Migfilin).	chr1 15957841
NM_001024215	NM_001024215	Filamin-binding LIM protein-1 (FBLP-1) (Fragment).	chr1 15963580
NM_001024216	NM_001024216	Filamin-binding LIM protein-1 (FBLP-1) (Fragment).	chr1 15964045
AK094772	AK094772	Hypothetical protein FLJ37453.	chr1 16033146
NM_015001	NM_015001	Msx2-interacting protein (SPEN homolog) (SMART/HDAC1 associated repressor protein).	chr1 16046945
NM_003443	NM_003443	Zinc finger and BTB domain-containing protein 17 (Zinc finger protein 151) (Myc-interacting zinc finger protein) (Miz-1 protein).	chr1 16140952
NM_178840	NM_178840	Hypothetical protein C1orf64 (Novel protein) (MGC24047).	chr1 16203317
NM_014424	CR749298	Heat-shock protein beta-7 (HspB7) (Cardiovascular heat shock protein) (cvHsp).	chr1 16213109
NM_014424	BC006319	Heat shock 27kDa protein family, member 7 (Cardiovascular).	chr1 16213111
NM_014424	CR749419	Heat-shock protein beta-7 (HspB7) (Cardiovascular heat shock protein) (cvHsp).	chr1 16213111
NM_014424	NM_014424	Heat-shock protein beta-7 (HspB7) (Cardiovascular heat shock protein) (cvHsp).	chr1 16213111
NM_014424	AK092275	Hypothetical protein FLJ34956 (Heat shock 27kDa protein family, member 7) (Cardiovascular).	chr1 16213113
BC053869	BC053869	Chloride channel protein ClC-Ka (Chloride channel Ka) (ClC-K1).	chr1 16220952
NM_004070	NM_004070	Chloride channel protein ClC-Ka (Chloride channel Ka) (ClC-K1).	chr1 16221696
NM_000085	BC033806	Chloride channel Kb.	chr1 16242911
NM_000085	NM_000085	Chloride channel protein ClC-Kb (Chloride channel Kb) (ClC-K2).	chr1 16242938
AK098217	AK098217	Chloride channel Kb.	chr1 16247870
NM_182623	NM_182623	Hypothetical protein C1orf117.	chr1 16256851
NM_004431	NM_004431	Ephrin type-A receptor 2 precursor (EC 2.7.1.112) (Tyrosine-protein kinase receptor ECK) (Epithelial cell kinase).	chr1 16323419
NM_153213	AK091281	Hypothetical protein FLJ33962.	chr1 16397185
NM_153213	NM_153213	Novel protein.	chr1 16397185
NM_030907	NM_030907	Hypothetical protein C1orf89.	chr1 16430782
NM_018994	NM_018994	F-box only protein 42.	chr1 16449146
NM_015609	BC023988	Putative MAPK activating protein.	chr1 16566306
NM_015609	NM_015609	Putative MAPK activating protein.	chr1 16566306
NM_015609	CR598986	Putative MAPK activating protein.	chr1 16566322
NM_015609	AB097046	Putative MAPK activating protein.	chr1 16566324
NM_015609	CR624498	Putative MAPK activating protein.	chr1 16566340
AK128106	AK128106	Hypothetical protein FLJ46227.	chr1 16594762
NM_198546	NM_198546	Hypothetical protein (Novel protein).	chr1 16597724
BC022039	BC022039	Novel protein (SPATA21 protein).	chr1 16623985
NM_018090	NM_018090	Adaptin ear-binding coat-associated protein 2 (NECAP-2).	chr1 16639819
NM_018090	AK024468	n/a	chr1 16639839
BC033082	BC033082	KIAA1922 protein.	chr1 16668003
BC006312	BC006312	Hypothetical protein (Fragment).	chr1 16817339
AK123337	AK123337	Hypothetical protein FLJ41343.	chr1 16828751
BC044862	BC044862	MST1 protein.	chr1 16843840
NM_014675	NM_014675	Tax1-binding protein 2.	chr1 17121031
AB007914	AB007914	Tax1-binding protein 2.	chr1 17123502
DQ139275	DQ139275	Tax1-binding protein 2.	chr1 17139120
NM_017459	AK222751	Microfibrillar-associated protein 2 precursor (MFAP-2) (Microfibril- associated glycoprotein) (MAGP) (MAGP-1).	chr1 17173585
NM_017459	NM_017459	Microfibrillar-associated protein 2 precursor (MFAP-2) (Microfibril- associated glycoprotein) (MAGP) (MAGP-1).	chr1 17173585
NM_022089	AY461712	Hypothetical protein FLJ90829.	chr1 17185039
NM_022089	AY461712	Probable cation-transporting ATPase 13A2 (EC 3.6.3.-).	chr1 17185039
NM_022089	BC030267	Cation-transporting ATPase.	chr1 17185039
NM_022089	NM_022089	Probable cation-transporting ATPase 13A2 (EC 3.6.3.-).	chr1 17185039
AK130020	AK130020	Hypothetical protein FLJ26510.	chr1 17194568
AY987009	AY987009	Hypothetical protein.	chr1 17194940
NM_003000	NM_003000	Succinate dehydrogenase [ubiquinone] iron-sulfur protein, mitochondrial precursor (EC 1.3.5.1) (Ip) (Iron-sulfur subunit of complex II).	chr1 17217840
AK123164	AK123164	Hypothetical protein FLJ41169.	chr1 17266681
NM_007365	NM_007365	Protein-arginine deiminase type II (EC 3.5.3.15) (Peptidylarginine deiminase II) (PAD-H19).	chr1 17267839
BC009701	BC009701	PADI2 protein (Peptidyl arginine deiminase, type II).	chr1 17278112
AK127830	AK127830	Hypothetical protein FLJ45933.	chr1 17388864
NM_013358	NM_013358	Protein-arginine deiminase type I (EC 3.5.3.15) (Peptidylarginine deiminase I).	chr1 17404216
NM_016233	NM_016233	Protein-arginine deiminase type III (EC 3.5.3.15) (Peptidylarginine deiminase III).	chr1 17448179
NM_012387	NM_012387	Protein-arginine deiminase type IV (EC 3.5.3.15) (Peptidylarginine deiminase IV) (HL-60 PAD).	chr1 17507278
NM_018715	AK126021	Hypothetical protein FLJ44033.	chr1 17605857
NM_018715	NM_018715	Protein RCC2 (Telophase disk protein of 60 kDa) (RCC1-like protein TD- 60).	chr1 17605865
NM_018125	NM_018125	Novel protein.	chr1 17738916
NM_001011722	NM_001011722	Novel protein.	chr1 17779634
NM_001011722	DQ139833	GrinchGEF.	chr1 17779677
AK001383	AK001383	Hypothetical protein FLJ10521.	chr1 17825088
NM_030812	NM_030812	Hypothetical protein FLJ32777 (Actin like protein).	chr1 17954430
NM_032880	NM_032880	CDNA FLJ90835 fis, clone Y79AA1002022, weakly similar to POLIOVIRUS RECEPTOR HOMOLOG.	chr1 18306826
NM_152375	NM_152375	Hypothetical protein FLJ38753.	chr1 18680452
NM_002584	NM_002584	Paired box protein Pax-7 (HUP1).	chr1 18830086
NM_002584	NM_013945	Paired box protein Pax-7 (HUP1).	chr1 18830086
NM_152232	NM_152232	Taste receptor type 1 member 2 precursor (G-protein coupled receptor 71) (Sweet taste receptor T1R2).	chr1 19038679
NM_003748	NM_003748	Delta-1-pyrroline-5-carboxylate dehydrogenase, mitochondrial precursor (EC 1.5.1.12) (P5C dehydrogenase) (Aldehyde dehydrogenase 4A1).	chr1 19070512
NM_020765	NM_020765	KIAA0462 protein (Fragment).	chr1 19273588
NM_020765	AB007931	Retinoblastoma-associated factor 600-like protein.	chr1 19273594
NM_020765	AB007931	Retinoblastoma-associated factor 600 (RBAF600).	chr1 19273594
NM_020765	AK125800	Hypothetical protein FLJ43812.	chr1 19273598
NM_020765	BC007962	RBAF600 protein (Fragment).	chr1 19273600
NM_020765	BC096758	Retinoblastoma-associated factor 600-like protein.	chr1 19273600
AK022322	AK022322	Hypothetical protein FLJ12260 (Retinoblastoma-associated factor 600) (RBAF600).	chr1 19310720
BX648708	BX648708	Hypothetical protein DKFZp686M0947.	chr1 19414744
D42044	D42044	Novel protein.	chr1 19415954
NM_015047	AK075563	CDNA PSEC0263 fis, clone NT2RP3004541.	chr1 19417171
NM_015047	BC034589	Novel protein.	chr1 19417171
NM_015047	NM_015047	KIAA0090 protein (Fragment).	chr1 19417171
NM_016183	NM_016183	mRNA turnover protein 4 homolog.	chr1 19450885
NM_201252	NM_201252	Aflatoxin B1 aldehyde reductase 3.	chr1 19465064
NM_012067	NM_012067	Aflatoxin B1 aldehyde reductase member 3 (EC 1.-.-.-) (AFB1-AR 2).	chr1 19481643
AK094604	AK094604	Hypothetical protein FLJ23873.	chr1 19492329
NM_003689	BC012171	Aflatoxin B1 aldehyde reductase member 2 (EC 1.-.-.-) (AFB1-AR 1) (Aldoketoreductase 7).	chr1 19503050
NM_003689	NM_003689	Aflatoxin B1 aldehyde reductase member 2 (EC 1.-.-.-) (AFB1-AR 1) (Aldoketoreductase 7).	chr1 19503050
NM_017765	AK000327	Hypothetical protein FLJ26661 (Novel protein).	chr1 19511406
NM_017765	NM_017765	Hypothetical protein FLJ20320 (PQLC2 protein).	chr1 19511406
NM_017765	AK172745	Hypothetical protein FLJ23906.	chr1 19511410
AK095564	AK095564	Hypothetical protein FLJ38245.	chr1 19531482
BC008095	AK125085	Capping protein (Actin filament) muscle Z-line, beta.	chr1 19537856
BC008095	BC008095	CAPZB protein.	chr1 19537859
BC107752	BC107752	Capping protein (Actin filament) muscle Z-line, beta.	chr1 19538440
BC107752	BC107752	F-actin capping protein beta subunit.	chr1 19538440
AK130267	AK130267	Hypothetical protein FLJ26757.	chr1 19550379
AK130383	AK130383	Hypothetical protein FLJ26873.	chr1 19597959
AK096102	AK096102	Hypothetical protein FLJ26873.	chr1 19598118
NM_001032363	NM_001032363	Novel protein.	chr1 19796053
BC072682	BC072682	Hypothetical protein.	chr1 19806887
NM_182744	NM_182744	Neuroblastoma suppressor of tumorigenicity 1 precursor (Zinc finger protein DAN) (N03).	chr1 19842312
BC012037	BC012037	Neuroblastoma, suppression of tumorigenicity 1.	chr1 19843457
NM_000871	NM_000871	5-hydroxytryptamine 6 receptor (5-HT-6) (Serotonin receptor 6).	chr1 19864366
NM_181719	BC053600	Hypothetical protein FLJ45636.	chr1 19881316
NM_181719	AX775875	Hypothetical protein (Fragment).	chr1 19881321
NM_181719	AX775877	Hypothetical protein (Fragment).	chr1 19881321
NM_181719	AX775879	Hypothetical protein (Fragment).	chr1 19881321
NM_181719	NM_181719	Hypothetical protein DKFZp686C23231.	chr1 19881323
NM_019062	NM_019062	Hypothetical protein FLJ20225 (Hypothetical protein RNF186) (Novel protein).	chr1 20013109
AB007928	AB007928	OTU domain-containing protein 3.	chr1 20081497
NM_000300	NM_000300	Phospholipase A2, membrane associated precursor (EC 3.1.1.4) (Phosphatidylcholine 2-acylhydrolase) (Group IIA phospholipase A2) (GIIC sPLA2) (Non-pancreatic secretory phospholipase A2) (NPS-PLA2).	chr1 20174517
NM_000929	NM_000929	Calcium-dependent phospholipase A2 precursor (EC 3.1.1.4) (Phosphatidylcholine 2-acylhydrolase) (PLA2-10) (Group V phospholipase A2).	chr1 20269424
NM_012400	NM_012400	Group IID secretory phospholipase A2 precursor (EC 3.1.1.4) (Phosphatidylcholine 2-acylhydrolase GIID) (GIID sPLA2) (PLA2IID) (sPLA(2)-IID) (Secretory-type PLA, stroma-associated homolog).	chr1 20311027
NM_022819	NM_022819	Group IIF secretory phospholipase A2 precursor (EC 3.1.1.4) (Phosphatidylcholine 2-acylhydrolase GIIF) (GIIF sPLA2) (sPLA(2)-IIF).	chr1 20338405
NM_152376	NM_152376	UBX domain-containing protein 3.	chr1 20385164
NM_144623	AK125833	Hypothetical protein FLJ43845.	chr1 20490016
NM_144623	NM_144623	Hypothetical protein FLJ32784.	chr1 20490016
AK057346	AK057346	Hypothetical protein FLJ32784.	chr1 20531994
BC020630	BC020630	PRO1489 (CAMK2N1 protein).	chr1 20681471
NM_018584	NM_018584	Calcium/calmodulin-dependent protein kinase II inhibitor alpha (CaMKIINalpha).	chr1 20682519
NM_024544	NM_024544	Hypothetical protein FLJ12875.	chr1 20698529
NM_207334	NM_207334	Protein FAM43B.	chr1 20751518
NM_001785	NM_001785	Cytidine deaminase (EC 3.5.4.5) (Cytidine aminohydrolase).	chr1 20788030
AY634312	AY634312	Small cytidine deaminase.	chr1 20788117
NM_032409	NM_032409	Serine/threonine-protein kinase PINK1, mitochondrial precursor (EC 2.7.1.37) (PTEN-induced putative kinase protein 1) (BRPK).	chr1 20832534
AK090466	AK090466	PINK1.	chr1 20841736
CR610703	CR610703	Dolichyl-diphosphooligosaccharide--protein glycosyltransferase 48 kDa subunit precursor (EC 2.4.1.119) (Oligosaccharyl transferase 48 kDa subunit) (DDOST 48 kDa subunit).	chr1 20850884
CR607247	D29643	Dolichyl-diphosphooligosaccharide--protein glycosyltransferase 48 kDa subunit precursor (EC 2.4.1.119) (Oligosaccharyl transferase 48 kDa subunit) (DDOST 48 kDa subunit).	chr1 20851267
CR607247	CR607247	Dolichyl-diphosphooligosaccharide--protein glycosyltransferase 48 kDa subunit precursor (EC 2.4.1.119) (Oligosaccharyl transferase 48 kDa subunit) (DDOST 48 kDa subunit).	chr1 20851270
NM_020816	BC065927	Kinesin-like protein KIF17 (KIF3-related motor protein).	chr1 20863095
NM_020816	NM_020816	Kinesin-like protein KIF17 (KIF3-related motor protein).	chr1 20863095
AK124869	AK124869	Hypothetical protein FLJ42879 (Novel protein).	chr1 20918811
AK023129	BC045660	Hypothetical protein DKFZp434I0612 (HP1-BP74) (HP1BP3 protein).	chr1 20941756
AK023129	AK023129	HP1-BP74.	chr1 20941765
AK023129	BC053327	HP1-BP74.	chr1 20941765
NM_016287	NM_016287	HP1-BP74.	chr1 20942214
BC032139	BC032139	Hypothetical protein (HP1-BP74).	chr1 20974734
NM_003760	AB209119	Eukaryotic translation initiation factor 4 gamma 3 (eIF-4-gamma 3) (eIF-4G 3) (eIF4G 3) (eIF-4-gamma II) (eIF4GII).	chr1 21005562
NM_003760	NM_003760	Eukaryotic translation initiation factor 4 gamma 3 (eIF-4-gamma 3) (eIF-4G 3) (eIF4G 3) (eIF-4-gamma II) (eIF4GII).	chr1 21005562
BC094683	BC094683	EIF4G3 protein.	chr1 21005743
BC072413	BC072413	Eukaryotic translation initiation factor 4 gamma 3 (eIF-4-gamma 3) (eIF-4G 3) (eIF4G 3) (eIF-4-gamma II) (eIF4GII).	chr1 21006095
BC030578	BC030578	Eukaryotic translation initiation factor 4 gamma, 3 (Fragment).	chr1 21140326
AK123231	AK123231	Hypothetical protein FLJ41237.	chr1 21417684
Z35307	Z35307	Endothelin-converting enzyme 1 (EC 3.4.24.71) (ECE-1).	chr1 21418616
NM_001397	D43698	Endothelin converting enzyme 1 (Fragment).	chr1 21418932
NM_001397	NM_001397	Endothelin-converting enzyme 1 (EC 3.4.24.71) (ECE-1).	chr1 21418938
NM_032264	AK095602	Hypothetical protein RP11-293F5.5.	chr1 21639216
NM_032264	NM_032264	Hypothetical protein RP11-293F5.5.	chr1 21639217
NM_032264	BC024011	Hypothetical protein RP11-293F5.5.	chr1 21639243
AL834330	AL834330	Hypothetical protein DKFZp434N1635.	chr1 21652470
NM_000478	NM_000478	Alkaline phosphatase, tissue-nonspecific isozyme precursor (EC 3.1.3.1) (AP-TNAP) (Liver/bone/kidney isozyme) (TNSALP).	chr1 21708455
NM_000478	AB209814	Alkaline phosphatase, liver/bone/kidney.	chr1 21708465
NM_002885	AB007943	RAP1, GTPase activating protein 1.	chr1 21795301
NM_002885	NM_002885	Rap1 GTPase-activating protein 1 (Rap1GAP).	chr1 21795301
NM_032236	NM_032236	Ubiquitin-specific protease 31 (Ubiquitin specific protease 48).	chr1 21877380
AF502942	AF502942	Hypothetical protein FLJ23054.	chr1 21877674
AK026707	AK026707	Ubiquitin specific protease 48.	chr1 21877982
BC013567	BC013567	Hypothetical protein FLJ11328 (USP48 protein).	chr1 21878304
BC104896	BC104896	Hypothetical protein FLJ23054.	chr1 21878455
BC104896	BC104896	USP48 protein (Fragment).	chr1 21878455
AK000110	AK000110	Hypothetical protein FLJ20103.	chr1 21884971
NM_001032730	NM_001032730	Ubiquitin specific protease 48.	chr1 21926926
CR619608	CR619608	Ubiquitin specific protease 48.	chr1 21926989
NM_001013693	NM_001013693	CDNA FLJ45342 fis, clone BRHIP3009753.	chr1 22011344
NM_005529	NM_005529	Basement membrane-specific heparan sulfate proteoglycan core protein precursor (HSPG) (Perlecan) (PLC).	chr1 22021324
X62515	X62515	Basement membrane-specific heparan sulfate proteoglycan core protein precursor (HSPG) (Perlecan) (PLC).	chr1 22021826
NM_007352	NM_007352	Elastase-3B precursor (EC 3.4.21.70) (Elastase IIIB) (Protease E).	chr1 22176004
NM_005747	NM_005747	Elastase-3A precursor (EC 3.4.21.70) (Elastase IIIA) (Protease E).	chr1 22200735
BC056896	BC056896	HSPC157 protein.	chr1 22229619
NM_001791	NM_001791	Cell division cycle 42 (GTP binding protein, 25kDa) (Fragment).	chr1 22251768
NM_001791	NM_044472	Cell division control protein 42 homolog (G25K GTP-binding protein).	chr1 22251768
NM_030761	NM_030761	Wnt-4 protein precursor.	chr1 22318786
NM_014870	NM_014870	Zinc finger and BTB domain-containing protein 40.	chr1 22650936
NM_001006943	NM_001006943	Hypothetical protein (Fragment).	chr1 22762590
NM_001006943	NM_020526	Ephrin type-A receptor 8 precursor (EC 2.7.1.112) (Tyrosine-protein kinase receptor EEK) (EPH-and ELK-related kinase) (HEK3).	chr1 22762590
NM_015991	NM_015991	Complement C1q subcomponent subunit A precursor.	chr1 22836686
NM_172369	NM_172369	Complement C1q subcomponent subunit C precursor.	chr1 22842733
BC008983	BC008983	Complement C1q subcomponent subunit B precursor.	chr1 22852326
NM_000491	NM_000491	Complement C1q subcomponent subunit B precursor.	chr1 22858473
BC067861	BC067861	EPHB2 protein.	chr1 22909918
NM_004442	AB210018	n/a	chr1 22910008
NM_004442	NM_004442	Ephrin type-B receptor 2 precursor (EC 2.7.1.112) (Tyrosine-protein kinase receptor EPH-3) (DRT) (Receptor protein-tyrosine kinase HEK5) (ERK).	chr1 22910044
NM_004442	NM_017449	Ephrin type-B receptor 2 precursor (EC 2.7.1.112) (Tyrosine-protein kinase receptor EPH-3) (DRT) (Receptor protein-tyrosine kinase HEK5) (ERK).	chr1 22910044
D31661	D31661	Ephrin receptor (Tyrosine-protein kinase receptor).	chr1 22974257
NM_015013	NM_015013	Lysine-specific histone demethylase 1 (EC 1.-.-.-) (Amine oxidase flavin containing domain protein 2) (AOF2 protein) (BRAF35-HDAC complex protein BHC110).	chr1 23218532
NM_015013	BC040194	Lysine-specific histone demethylase 1 (EC 1.-.-.-) (Amine oxidase flavin containing domain protein 2) (AOF2 protein) (BRAF35-HDAC complex protein BHC110).	chr1 23218575
NM_033631	NM_033631	LUZP1 protein.	chr1 23284037
BC033219	BC033219	LUZP1 protein.	chr1 23286780
BC051733	BC051733	LUZP1 protein.	chr1 23289507
NM_000864	NM_000864	5-hydroxytryptamine 1D receptor (5-HT-1D) (Serotonin receptor 1D) (5- HT-1D-alpha).	chr1 23390975
NM_005826	BC001449	Heterogeneous nuclear ribonucleoprotein R (hnRNP R).	chr1 23508863
NM_005826	NM_005826	Heterogeneous nuclear ribonucleoprotein R (hnRNP R).	chr1 23508863
NM_005826	AF000364	Hypothetical protein DKFZp686O0665.	chr1 23508870
DQ351905	DQ351905	Hypothetical protein DKFZp686O0665.	chr1 23509533
NM_030634	NM_030634	Zinc finger protein 436.	chr1 23559054
NM_138479	NM_138479	Hypothetical protein FLJ90508 (Hypothetical protein LOC148898).	chr1 23568050
NM_003196	NM_003196	Transcription elongation factor A protein 3 (Transcription elongation factor S-II protein 3) (Transcription elongation factor TFIIS.h).	chr1 23580141
AY540752	AY540752	Rhabdomyosarcoma antigen MU-RMS-40.22.	chr1 23602560
NM_017707	AK000206	Hypothetical protein FLJ20199.	chr1 23627642
NM_017707	BC023519	DDEFL1 protein.	chr1 23627642
NM_017707	NM_017707	DDEFL1 protein.	chr1 23627642
NM_017707	AK000253	Hypothetical protein FLJ20246.	chr1 23627646
BC024651	BC024651	Hypothetical protein.	chr1 23673681
NM_004091	BC053676	E2F2 protein.	chr1 23705508
NM_004091	NM_004091	Transcription factor E2F2 (E2F-2).	chr1 23705508
NM_002167	NM_002167	DNA-binding protein inhibitor ID-3 (Inhibitor of DNA binding 3) (ID- like protein inhibitor HLH 1R21) (Helix-loop-helix protein HEIR-1).	chr1 23757042
BC069164	BC069164	MDS2 protein (Novel protein).	chr1 23826410
NM_000975	NM_000975	60S ribosomal protein L11 (CLL-associated antigen KW-12).	chr1 23890880
NM_000975	BC018970	Ribosomal protein L11 (Fragment).	chr1 23890893
NM_003198	NM_003198	Transcription elongation factor B polypeptide 3 (RNA polymerase II transcription factor SIII subunit A1) (SIII p110) (Elongin A) (EloA) (Elongin 110 kDa subunit).	chr1 23942548
NM_003198	AF116729	Transcription elongation factor B polypeptide 3 (RNA polymerase II transcription factor SIII subunit A1) (SIII p110) (Elongin A) (EloA) (Elongin 110 kDa subunit).	chr1 23942593
NM_020362	NM_020362	Novel protein (HT014).	chr1 23977474
NM_020362	BC017208	Novel protein (HT014).	chr1 23977501
NM_007260	NM_007260	Acyl-protein thioesterase 2 (EC 3.1.2.-) (Lysophospholipase II) (LPL- I).	chr1 23990232
NM_007260	CR605682	Lysophospholipase II.	chr1 23990263
NM_007260	BC017034	Lysophospholipase II.	chr1 23990267
AF090423	AF090423	Lysophospholipase II.	chr1 23991068
NM_000403	NM_000403	UDP-glucose 4-epimerase (EC 5.1.3.2) (Galactowaldenase) (UDP-galactose 4-epimerase).	chr1 23994675
NM_000191	NM_000191	Hydroxymethylglutaryl-CoA lyase, mitochondrial precursor (EC 4.1.3.4) (HMG-CoA lyase) (HL) (3-hydroxy-3-methylglutarate-CoA lyase).	chr1 24000954
NM_000191	BC010570	3-hydroxymethyl-3-methylglutaryl-Coenzyme A lyase (Hydroxymethylglutaricaciduria).	chr1 24000963
CR613735	CR613735	3-hydroxymethyl-3-methylglutaryl-Coenzyme A lyase (Hydroxymethylglutaricaciduria).	chr1 24008363
NM_000147	BC017338	Alpha-L-fucosidase.	chr1 24044160
NM_000147	NM_000147	Tissue alpha-L-fucosidase precursor (EC 3.2.1.51) (Alpha-L-fucosidase I) (Alpha-L-fucoside fucohydrolase).	chr1 24044160
NM_000147	AK092914	Hypothetical protein FLJ35595.	chr1 24044173
NM_001841	NM_001841	Cannabinoid receptor 2 (CB2) (CB-2) (CX5).	chr1 24073047
NM_017761	NM_017761	Proline-rich nuclear receptor coactivator 2.	chr1 24158916
NM_006625	NM_006625	FUS interacting protein (Serine-arginine rich) 1.	chr1 24165525
NM_006625	AY007101	FUS interacting protein (Serine-arginine rich) 1.	chr1 24165530
BC010074	BC010074	FUS interacting protein (Serine-arginine rich) 1.	chr1 24166538
NM_054016	AK001656	FUS-interacting serine-arginine-rich protein 1 (TLS-associated protein with Ser-Arg repeats) (TLS-associated protein with SR repeats) (TASR) (TLS-associated serine-arginine protein) (TLS-associated SR protein) (40 kDa SR-repressor protein) (SRrp40) (Splic	chr1 24168159
NM_054016	NM_054016	FUS-interacting serine-arginine-rich protein 1 (TLS-associated protein with Ser-Arg repeats) (TLS-associated protein with SR repeats) (TASR) (TLS-associated serine-arginine protein) (TLS-associated SR protein) (40 kDa SR-repressor protein) (SRrp40) (Splic	chr1 24168159
BC071575	BC071575	FUS-interacting serine-arginine-rich protein 1 (TLS-associated protein with Ser-Arg repeats) (TLS-associated protein with SR repeats) (TASR) (TLS-associated serine-arginine protein) (TLS-associated SR protein) (40 kDa SR-repressor protein) (SRrp40) (Splic	chr1 24169457
AK093280	AK093280	Hypothetical protein FLJ35961.	chr1 24255111
BC067101	BC067101	MYOM3 protein.	chr1 24264724
AK125972	AK125972	Hypothetical protein FLJ43984.	chr1 24280625
NM_021258	NM_021258	Interleukin 22 receptor, alpha 1.	chr1 24318847
NM_170743	NM_170743	Interleukin-28 receptor alpha chain precursor (IL-28R-alpha) (IL-28RA) (Cytokine receptor family 2 member 12) (Cytokine receptor class-II member 12) (CRF2-12) (Interferon lambda receptor 1) (IFN-lambda R1) (Likely interleukin or cytokine receptor 2).	chr1 24353234
NM_170743	NM_173064	Interleukin 28 receptor, alpha (Interferon, lambda receptor).	chr1 24353234
NM_170743	NM_173065	Soluble isoform of Likely Interleukin or Cytokine Receptor 2 (Interleukin 28 receptor, alpha) (Interferon, lambda receptor).	chr1 24353234
AY129153	AY129153	Interleukin 28 receptor, alpha (Interferon, lambda receptor).	chr1 24360455
NM_198173	NM_198173	GRHL3 protein (Transcription factor CP2-like 4).	chr1 24518467
NM_198173	AK074386	Hypothetical protein FLJ23806.	chr1 24518501
NM_198173	AK074386	Transcription factor CP2-like 4.	chr1 24518501
BC036890	BC036890	GRHL3 protein (Transcription factor CP2-like 4).	chr1 24518642
NM_021180	NM_021180	GRHL3 protein (Transcription factor CP2-like 4).	chr1 24522116
NM_021180	NM_198174	Hypothetical protein (Fragment).	chr1 24522116
NM_178122	BC040212	Novel protein.	chr1 24556076
NM_178122	BC063891	Novel protein.	chr1 24556076
NM_178122	NM_178122	LOC90529 protein.	chr1 24556076
NM_178122	BC035061	LOC90529 protein.	chr1 24556081
NM_020448	BC001265	NPAL3 protein (Novel protein).	chr1 24614889
NM_020448	BC063583	Hypothetical protein DKFZp686H2054 (Novel protein).	chr1 24614904
NM_020448	NM_020448	Hypothetical protein DKFZp686H2054 (Novel protein).	chr1 24614904
NM_013441	NM_013441	Calcipressin-3 (Down syndrome candidate region 1-like protein 2) (Myocyte-enriched calcineurin-interacting protein 3) (MCIP3).	chr1 24701973
AY906854	AY906854	Down syndrome candidate region 1-like 2 isoform.	chr1 24713449
NM_001010980	NM_001010980	Novel protein.	chr1 24755188
NM_005839	NM_005839	Serine/arginine repetitive matrix protein 1 (Ser/Arg-related nuclear matrix protein) (SR-related nuclear matrix protein of 160 kDa) (SRm160).	chr1 24842180
NM_013943	NM_013943	Chloride intracellular channel protein 4 (Intracellular chloride ion channel protein p64H1).	chr1 24944434
NM_004350	NM_004350	Runt-related transcription factor 3 (Core-binding factor, alpha 3 subunit) (CBF-alpha 3) (Acute myeloid leukemia 2 protein) (Oncogene AML-2) (Polyomavirus enhancer binding protein 2 alpha C subunit) (PEBP2-alpha C) (PEA2-alpha C) (SL3-3 enhancer factor 1	chr1 25098645
NM_001031680	NM_001031680	Runt-related transcription factor 3.	chr1 25100130
NM_015484	NM_015484	Hypothetical protein DKFZp564O2082 (CCNDBP1 interactor, isoform 1) (GCIP-interacting protein p29) (P29).	chr1 25421355
NM_015484	NM_207170	GCIP-interacting protein p29 (P29).	chr1 25421355
NM_020317	NM_020317	NPD014 protein (NPD014).	chr1 25441327
NM_020317	NM_207035	HT033 (NPD014) (Hypothetical protein FLJ14412).	chr1 25441327
NM_020317	BC041843	C1orf63 protein.	chr1 25441333
NM_016124	NM_016124	Blood group Rh(D) polypeptide (Rhesus D antigen) (RHXIII) (Rh polypeptide 2) (RhPII).	chr1 25471567
NM_016124	NM_016225	Rh blood group C antigen (Fragment).	chr1 25471567
AF037626	AF037626	Blood group Rh(D) polypeptide (Rhesus D antigen) (RHXIII) (Rh polypeptide 2) (RhPII).	chr1 25471625
AF037626	AY751491	Rh blood group C antigen (Fragment).	chr1 25471625
AF037626	AY751492	Rh blood group C antigen (Fragment).	chr1 25471625
AF037626	AY751493	Rh blood group C antigen (Fragment).	chr1 25471625
AF037626	AY751494	Rh blood group C antigen (Fragment).	chr1 25471625
AF037626	AY751495	Rh blood group C antigen (Fragment).	chr1 25471625
AF037626	AY751496	Rh blood group C antigen (Fragment).	chr1 25471625
AK024382	AK024382	Hypothetical protein FLJ14320.	chr1 25488915
NM_014313	NM_014313	Transmembrane protein 50A (Small membrane protein 1).	chr1 25537397
NM_020485	NM_020485	Blood group Rh(CE) polypeptide (Rhesus C/E antigens) (Rh30A) (RhIXB) (Rh polypeptide 1) (RhPI).	chr1 25561327
NM_020485	NM_138616	Rhesus blood group antigen isoform (Fragment).	chr1 25561327
NM_020485	NM_138617	Rhesus blood group, CcEe antigens.	chr1 25561327
NM_020485	NM_138618	Rhesus blood group, CcEe antigens.	chr1 25561327
AK127547	AK127547	Hypothetical protein FLJ45640.	chr1 25561389
AF510065	AF510065	Rhesus blood group, CcEe antigens.	chr1 25561470
NM_018202	NM_018202	Hypothetical protein TMEM57.	chr1 25630005
AY845035	AY845035	Hypothetical protein FLJ23007.	chr1 25630067
AY845035	AY845036	Hypothetical protein FLJ23007.	chr1 25630067
AY845035	BC032427	Hypothetical protein FLJ23007.	chr1 25630067
NM_015627	BC029770	Low density lipoprotein receptor adapter protein 1 (Autosomal recessive hypercholesterolemia protein).	chr1 25742752
NM_015627	NM_015627	Low density lipoprotein receptor adapter protein 1 (Autosomal recessive hypercholesterolemia protein).	chr1 25742752
AK024397	AK024397	Hypothetical protein FLJ14335.	chr1 25752441
NM_020379	AF261655	Mannosidase, alpha, class 1C, member 1.	chr1 25816545
NM_020379	NM_020379	Mannosyl-oligosaccharide 1,2-alpha-mannosidase IC (EC 3.2.1.113) (Processing alpha-1,2-mannosidase IC) (Alpha-1,2-mannosidase IC) (Mannosidase alpha class 1C member 1) (HMIC).	chr1 25816545
NM_020451	NM_020451	n/a	chr1 25999253
NM_020451	NM_206926	n/a	chr1 25999253
AK054768	AK054768	Hypothetical protein FLJ30206.	chr1 26017568
AF173891	AF173891	MSTP116.	chr1 26019080
NM_019557	NM_019557	Hypothetical protein DKFZp564M0163.	chr1 26019270
BC017175	BC017175	MSTP116.	chr1 26019905
AK056721	AK056721	Hypothetical protein DKFZp686M0519.	chr1 26020600
NM_024037	NM_024037	Hypothetical protein FLJ14264 (Hypothetical protein C1orf135).	chr1 26033083
NM_178422	NM_178422	Membrane progestin receptor alpha (mPR alpha) (Progestin and adipoQ receptor family member VII).	chr1 26060562
NM_152497	NM_152497	Hypothetical protein FLJ32206.	chr1 26083258
NM_203401	NM_203401	Stathmin (Phosphoprotein p19) (pp19) (Oncoprotein 18) (Op18) (Leukemia-associated phosphoprotein p18) (pp17) (Prosolin) (Metablastin) (Pr22 protein).	chr1 26099194
NM_000437	NM_000437	Platelet-activating factor acetylhydrolase 2, cytoplasmic (EC 3.1.1.47) (Serine dependent phospholipase A2) (HSD-PLA2).	chr1 26159901
NM_004455	NM_004455	Exostosin-like 1 (EC 2.4.1.224) (Glucuronosyl-N-acetylglucosaminyl- proteoglycan 4-alpha-N-acetylglucosaminyltransferase) (Exostosin-L) (Multiple exostosis-like protein).	chr1 26220857
NM_001004434	NM_001004434	Zinc transporter 2 (ZnT-2) (Solute carrier family 30 member 2).	chr1 26237100
NM_001004434	NM_032513	Zinc transporter 2 (ZnT-2) (Solute carrier family 30 member 2).	chr1 26237100
NM_032588	AJ291713	Ubiquitin ligase TRIM63 (EC 6.3.2.-) (Tripartite motif-containing 63) (Muscle-specific RING finger protein 1) (MuRF1) (MURF-1) (RING finger protein 28) (Striated muscle RING zinc finger protein) (Iris RING finger protein).	chr1 26250384
NM_032588	NM_032588	Ubiquitin ligase TRIM63 (EC 6.3.2.-) (Tripartite motif-containing 63) (Muscle-specific RING finger protein 1) (MuRF1) (MURF-1) (RING finger protein 28) (Striated muscle RING zinc finger protein) (Iris RING finger protein).	chr1 26250384
NM_152835	NM_152835	Novel protein (Fragment).	chr1 26310917
BC025658	BC025658	GRRP1 protein (Novel protein).	chr1 26358111
NM_015871	BC002580	Zinc finger protein 593.	chr1 26368996
NM_015871	NM_015871	Zinc finger protein 593 (Zinc finger protein T86).	chr1 26369016
NM_006314	BC011604	Connector enhancer of kinase suppressor of ras 1 (Connector enhancer of KSR1) (hCNK1) (Connector enhancer of KSR-like) (CNK homolog protein 1).	chr1 26376586
NM_006314	NM_006314	Connector enhancer of kinase suppressor of ras 1 (Connector enhancer of KSR1) (hCNK1) (Connector enhancer of KSR-like) (CNK homolog protein 1).	chr1 26376589
NM_022778	AK024038	Hypothetical protein FLJ13976.	chr1 26433277
NM_022778	BC064528	Hypothetical protein FLJ22000 (CCDC21 protein) (OTTHUMP00000003457).	chr1 26433279
NM_022778	NM_022778	OTTHUMP00000003456 (Fragment).	chr1 26433279
AL133609	AL133609	Hypothetical protein FLJ22000 (CCDC21 protein) (OTTHUMP00000003457).	chr1 26456750
NM_031286	NM_031286	SH3 domain-binding glutamic acid-rich-like protein 3 (SH3 domain- binding protein 1) (SH3BP-1).	chr1 26479030
AK094198	AK094198	Hypothetical protein FLJ36879.	chr1 26480405
NM_145345	BC038106	Socius (SOC).	chr1 26481358
NM_145345	BC038106	Socius (SOC) (Fragment).	chr1 26481358
NM_145345	AF370425	PP2243.	chr1 26481361
NM_145345	AK097368	Hypothetical protein FLJ40049.	chr1 26481361
NM_145345	BX648412	Socius (SOC) (Fragment).	chr1 26481361
NM_145345	NM_145345	Socius (SOC) (Fragment).	chr1 26481361
NM_145345	NM_183008	Socius (SOC) (Fragment).	chr1 26481361
NM_001803	NM_001803	CAMPATH-1 antigen precursor (CD52 antigen) (CDW52) (Cambridge pathology 1 antigen) (Epididymal secretory protein E5).	chr1 26516997
AK095339	AK095339	Absent in melanoma 1-like.	chr1 26520936
AK095339	AK095339	Absent in melanoma 1-like.	chr1 26520936
NM_173574	NM_173574	Novel protein (Fragment).	chr1 26560712
NM_173574	BC028731	Novel protein (Fragment).	chr1 26560714
AK022519	AK022519	Hypothetical protein FLJ12457 (RNA-binding protein LIN-28) (C. elegans).	chr1 26609894
NM_024887	BX648507	Dehydrodolichyl diphosphate synthase.	chr1 26631359
NM_024887	NM_024887	Dehydrodolichyl diphosphate synthase (EC 2.5.1.-) (Dedol-PP synthase).	chr1 26631388
NM_024887	NM_205861	Dehydrodolichyl diphosphate synthase (EC 2.5.1.-) (Dedol-PP synthase).	chr1 26631388
NM_024887	BC004117	Dehydrodolichyl diphosphate synthase (Fragment).	chr1 26631417
BC003643	BC003643	Dehydrodolichyl diphosphate synthase.	chr1 26631968
NM_005517	NM_005517	Nonhistone chromosomal protein HMG-17 (High-mobility group nucleosome binding domain 2).	chr1 26671500
NM_002953	NM_002953	Ribosomal protein S6 kinase alpha 1 (EC 2.7.1.37) (S6K-alpha 1) (90 kDa ribosomal protein S6 kinase 1) (p90-RSK 1) (Ribosomal S6 kinase 1) (RSK-1) (pp90RSK1).	chr1 26728835
NM_002953	BC014966	Ribosomal protein S6 kinase, 90kDa, polypeptide 1.	chr1 26728851
NM_001006665	NM_001006665	Ribosomal protein S6 kinase, 90kDa, polypeptide 1.	chr1 26744929
NM_006015	AF231056	Hypothetical protein FLJ14749 (AT rich interactive domain 1A) (SWI- like).	chr1 26895110
NM_006015	AF231056	Hypothetical protein FLJ14536.	chr1 26895110
NM_006015	AF231056	Hypothetical protein FLJ14561.	chr1 26895110
NM_006015	NM_006015	AT-rich interactive domain-containing protein 1A (ARID domain- containing protein 1A) (SWI/SNF-related, matrix-associated, actin- dependent regulator of chromatin subfamily F member 1) (SWI-SNF complex protein p270) (B120) (SWI-like protein) (Osa homolog	chr1 26895111
NM_006015	NM_018450	AT rich interactive domain 1A (SWI-like) (Fragment).	chr1 26895111
NM_006015	NM_139135	AT rich interactive domain 1A (SWI-like) (Fragment).	chr1 26895111
AF521670	AF521670	Hypothetical protein FLJ90459.	chr1 26896339
AF268913	AF268913	AT rich interactive domain 1A (SWI-like) (Fragment).	chr1 26928740
NM_017837	NM_017837	Novel protein (Fragment).	chr1 26987072
NM_032283	NM_032283	Palmitoyltransferase ZDHHC18 (EC 2.3.1.-) (Zinc finger DHHC domain- containing protein 18) (DHHC-18).	chr1 27025787
NM_006142	NM_006142	14-3-3 protein sigma (Stratifin) (Epithelial cell marker protein 1).	chr1 27062219
BC008634	BC008634	Hypothetical protein ATPBD1B.	chr1 27078459
NM_022078	NM_022078	G patch domain containing protein 3.	chr1 27089566
NM_021969	NM_021969	Nuclear receptor 0B2 (Orphan nuclear receptor SHP) (Small heterodimer partner).	chr1 27110565
NM_006600	NM_006600	Nuclear migration protein nudC (Nuclear distribution protein C homolog).	chr1 27120810
NM_006600	CR612818	Nuclear migration protein nudC (Nuclear distribution protein C homolog).	chr1 27120819
NM_152365	BC033143	C1orf172 protein.	chr1 27148641
NM_152365	NM_152365	C1orf172 protein.	chr1 27148647
NM_001013642	NM_001013642	Hypothetical LOC388610.	chr1 27192784
NM_052943	NM_052943	Hypothetical protein FAM46B (Novel protein) (Family with sequence similarity 46, member B).	chr1 27204099
NM_003047	NM_003047	Sodium/hydrogen exchanger 1 (Na(+)/H(+) exchanger 1) (NHE-1) (Solute carrier family 9 member 1) (Na(+)/H(+) antiporter, amiloride- sensitive) (APNH).	chr1 27297893
NM_003047	S68616	Solute carrier family 9 (Sodium/hydrogen exchanger), isoform 1 (Antiporter, Na+/H+, amiloride sensitive).	chr1 27297893
BC012121	BC012121	Solute carrier family 9 (Sodium/hydrogen exchanger), isoform 1 (Antiporter, Na+/H+, amiloride sensitive) (Fragment).	chr1 27304528
NM_015023	NM_015023	WD and tetratricopeptide repeats protein 1.	chr1 27433745
AK001734	AK001734	Novel protein.	chr1 27460125
AK023778	AK023778	Novel protein (Fragment).	chr1 27495416
NM_032125	NM_032125	C1orf160 protein.	chr1 27521308
NM_032125	BC011579	Hypothetical protein.	chr1 27521325
NM_032125	BC090039	C1orf160 protein.	chr1 27521330
NM_032872	NM_032872	Synaptotagmin-like protein 1 (Exophilin-7) (JFC1 protein) (SB146).	chr1 27541099
NM_032872	AK096437	Synaptotagmin-like 1.	chr1 27541134
NM_032872	BC035725	Synaptotagmin-like protein 1 (Exophilin-7) (JFC1 protein) (SB146).	chr1 27541162
AK074154	AK074154	Synaptotagmin-like 1.	chr1 27544236
AK097172	AK097172	Synaptotagmin-like 1 (Fragment).	chr1 27546621
AK126120	AK126120	Hypothetical protein FLJ44132.	chr1 27550549
NM_004672	NM_004672	Mitogen-activated protein kinase kinase kinase 6 (EC 2.7.1.37).	chr1 27554256
NM_004672	AB208805	Mitogen-activated protein kinase kinase kinase 6.	chr1 27554263
NM_004672	AB208805	Mitogen-activated protein kinase kinase kinase 6 (EC 2.7.1.37).	chr1 27554263
NM_004672	AB208805	Mitogen-activated protein kinase kinase kinase 6.	chr1 27554263
NM_004672	BC015914	MAP3K6 protein (Fragment).	chr1 27554263
BC109032	BC109032	Hypothetical protein.	chr1 27557234
NM_003665	BC020731	NL3.	chr1 27568189
NM_003665	D88587	NL3.	chr1 27568189
NM_003665	NM_003665	Ficolin-3 precursor (Collagen/fibrinogen domain-containing protein 3) (Collagen/fibrinogen domain-containing lectin 3 p35) (Hakata antigen).	chr1 27568189
NM_003665	NM_173452	NL3 (Ficolin (Collagen/fibrinogen domain containing) 3) (Hakata antigen).	chr1 27568189
NM_003665	CR604997	Ficolin (Collagen/fibrinogen domain containing) 3 (Hakata antigen).	chr1 27568219
NM_207397	NM_207397	EAPG6122 (Novel protein).	chr1 27578252
NM_005281	NM_005281	Probable G-protein coupled receptor 3 (ACCA orphan receptor).	chr1 27591738
NM_006990	NM_006990	Wiskott-Aldrich syndrome protein family member 2 (WASP-family protein member 2) (WAVE-2 protein) (Verprolin homology domain-containing protein 2).	chr1 27604712
BC040943	BC040943	Hypothetical protein FLJ90750.	chr1 27606887
NM_001029882	AK125431	AHDC1 protein.	chr1 27733770
NM_001029882	NM_001029882	Novel protein.	chr1 27733770
NM_001029882	BC014394	Hypothetical protein.	chr1 27733778
NM_001029882	BC014394	AHDC1 protein.	chr1 27733778
NM_005248	NM_005248	Proto-oncogene tyrosine-protein kinase FGR (EC 2.7.1.112) (P55-FGR) (C-FGR).	chr1 27811397
NM_002038	NM_002038	Interferon-induced protein 6-16 precursor (Ifi-6-16).	chr1 27865167
NM_002038	NM_022872	Interferon-induced protein 6-16 precursor (Ifi-6-16).	chr1 27865167
NM_002038	NM_022873	Interferon-induced protein 6-16 precursor (Ifi-6-16).	chr1 27865167
NM_152660	NM_152660	Hypothetical protein FLJ40999 (Novel protein) (MGC34648).	chr1 27925076
NM_152660	AK098318	Hypothetical protein FLJ40999 (Novel protein) (MGC34648).	chr1 27925125
NM_177424	BC046999	STX12 protein (Fragment).	chr1 27972369
NM_177424	NM_177424	Syntaxin-12.	chr1 27972369
NM_002713	NM_002713	PPP1R8 protein (Protein phosphatase 1, regulatory (Inhibitor) subunit 8) (Fragment).	chr1 28029879
NM_002713	NM_014110	Nuclear inhibitor of protein phosphatase 1 (NIPP-1) (Protein phosphatase 1, regulatory inhibitor subunit 8) [Includes: Activator of RNA decay (EC 3.1.4.-) (ARD-1)].	chr1 28029879
NM_002713	NM_138558	Protein phosphatase 1 regulatory subunit 8 testis splice variant (Fragment).	chr1 28029879
BC031655	BC031655	Chromosome 1 open reading frame 38 (Fragment).	chr1 28071672
BC081568	BC081568	Hypothetical protein.	chr1 28078765
AK094833	AK094833	Hypothetical protein FLJ37514.	chr1 28082495
NM_002946	NM_002946	Replication protein A 32 kDa subunit (RP-A) (RF-A) (Replication factor-A protein 2) (P34).	chr1 28090636
NM_002946	CR612693	Replication protein A2, 32kDa.	chr1 28090661
NM_001009568	NM_001009568	Sphingomyelin phosphodiesterase, acid-like 3B (Fragment).	chr1 28134090
NM_001009568	NM_014474	Acid sphingomyelinase-like phosphodiesterase 3b precursor (EC 3.1.4.-) (ASM-like phosphodiesterase 3b).	chr1 28134090
NM_018053	NM_018053	XK-related protein 8.	chr1 28159090
NM_018053	BC013379	Hypothetical protein FLJ10307 (XKR8 protein).	chr1 28159100
BX648945	BX648945	n/a	chr1 28169442
NM_001990	NM_001990	Eyes absent homolog 3 (EC 3.1.3.48).	chr1 28173405
BC041667	BC041667	EYA3 protein (Eyes absent homolog 3) (Drosophila).	chr1 28176372
NM_000952	NM_000952	Platelet-activating factor receptor (PAF-R).	chr1 28348450
S52624	S52624	Platelet-activating factor receptor (PAF-R).	chr1 28348771
BC033159	BC033159	DnaJ homolog subfamily C member 8 (Splicing protein spf31).	chr1 28399656
NM_016311	NM_016311	ATPase inhibitor, mitochondrial precursor.	chr1 28435197
NM_016311	BC009677	ATPIF1 protein.	chr1 28435230
NM_031459	NM_031459	Sestrin-2 (Hi95).	chr1 28458592
NM_017638	NM_017638	Hypothetical protein FLJ20045.	chr1 28528135
BC068508	BC029266	PHACTR4 protein.	chr1 28568820
BC068508	BC029266	Hypothetical protein PHACTR4 (Novel protein).	chr1 28568820
BC068508	BC029266	Hypothetical protein FLJ13171.	chr1 28568820
BC068508	BC029266	PRO2963.	chr1 28568820
BC068508	BC068508	PHACTR4 protein.	chr1 28568841
NM_001269	NM_001269	Regulator of chromosome condensation (Chromosome condensation protein 1) (Cell cycle regulatory protein).	chr1 28705154
BC069198	BC069198	Regulator of chromosome condensation (Chromosome condensation protein 1) (Cell cycle regulatory protein).	chr1 28717366
NM_017846	BC000680	SECP43 protein.	chr1 28752191
NM_017846	NM_017846	SECP43 protein.	chr1 28752191
BC022205	BC022205	PNAS-123 (LOC85028) (Transformation-related protein 11).	chr1 28777639
NM_152304	NM_152304	RAB42, member RAS homolog family (Novel protein) (MGC45806).	chr1 28791298
NM_005644	NM_005644	Transcription initiation factor TFIID subunit 12 (Transcription initiation factor TFIID 20/15 kDa subunits) (TAFII-20/TAFII-15) (TAFII20/TAFII15).	chr1 28802199
NM_006582	NM_006582	Glucocorticoid modulatory element-binding protein 1 (GMEB-1) (Parvovirus initiation factor p96) (PIF p96) (DNA-binding protein p96PIF).	chr1 28867830
NM_006582	NM_024482	Glucocorticoid modulatory element binding protein 1.	chr1 28867830
BC002559	BC002559	YTH domain protein 2 (High-glucose-regulated protein 8) (NY-REN-2 antigen) (CLL-associated antigen KW-14).	chr1 28935857
BC002559	BC002559	n/a	chr1 28935857
CR595878	CR595878	YTH domain protein 2 (High-glucose-regulated protein 8) (NY-REN-2 antigen) (CLL-associated antigen KW-14).	chr1 28936060
NM_000911	NM_000911	Delta-type opioid receptor (DOR-1).	chr1 29011240
NM_004437	AB209649	n/a	chr1 29086189
NM_004437	NM_004437	Erythrocyte membrane protein band 4.1 (Elliptocytosis 1, RH- linked).	chr1 29086214
NM_004437	NM_203342	Hypothetical protein (Fragment).	chr1 29086214
NM_004437	NM_203343	Protein 4.1 (Band 4.1) (P4.1) (EPB4.1) (4.1R).	chr1 29086214
BC096105	BC096105	Erythrocyte membrane protein band 4.1 (Elliptocytosis 1, RH- linked).	chr1 29186802
NM_001003682	NM_001003682	Hypothetical protein DKFZp434C184 (TTMB protein).	chr1 29318531
NM_005626	NM_005626	Splicing factor, arginine/serine-rich 4 (Pre-mRNA splicing factor SRP75) (SRP001LB).	chr1 29346951
NM_016011	NM_016011	Trans-2-enoyl-CoA reductase, mitochondrial precursor (EC 1.3.1.38) (HsNrbf-1) (NRBF-1).	chr1 29391971
NM_005704	NM_005704	Receptor-type tyrosine-protein phosphatase U precursor (EC 3.1.3.48) (R-PTP-U) (Protein-tyrosine phosphatase J) (PTP-J) (Pancreatic carcinoma phosphatase 2) (PCP-2).	chr1 29435614
NM_005704	NM_133177	Receptor-type tyrosine-protein phosphatase U precursor (EC 3.1.3.48) (R-PTP-U) (Protein-tyrosine phosphatase J) (PTP-J) (Pancreatic carcinoma phosphatase 2) (PCP-2).	chr1 29435614
NM_005704	NM_133178	Receptor-type tyrosine-protein phosphatase U precursor (EC 3.1.3.48) (R-PTP-U) (Protein-tyrosine phosphatase J) (PTP-J) (Pancreatic carcinoma phosphatase 2) (PCP-2).	chr1 29435614
NM_002379	NM_002379	Cartilage matrix protein precursor (Matrilin-1).	chr1 30958584
AK128076	AK128076	Hypothetical protein FLJ46197.	chr1 30963526
AK057725	AK057725	Hypothetical protein FLJ33163.	chr1 30964205
NM_006762	NM_006762	Lysosomal-associated multitransmembrane protein (Retinoic acid- inducible E3 protein) (HA1520).	chr1 30977902
AB007937	AB007937	Syndecan-3 (SYND3).	chr1 31114900
AB007937	BC013974	n/a	chr1 31114900
NM_014654	NM_014654	Syndecan-3 (SYND3).	chr1 31118568
NM_001020658	NM_001020658	Pumilio homolog 1 (Pumilio-1) (HsPUM).	chr1 31176939
NM_001020658	NM_014676	Pumilio homolog 1 (Pumilio-1) (HsPUM).	chr1 31176939
BX647437	AK096476	Pumilio homolog 1 (Drosophila).	chr1 31178280
BX647437	BX647437	Pumilio homolog 1 (Drosophila).	chr1 31178283
AF111851	AF111851	PRO0611.	chr1 31233498
NM_024522	NM_024522	Hypothetical protein (Fragment).	chr1 31425179
NM_004814	NM_004814	WD-repeat protein 57 (Prp8-binding protein) (hPRP8BP) (U5 snRNP- specific 40 kDa protein) (38 kDa splicing factor).	chr1 31505107
NM_004814	AL157420	Hypothetical protein DKFZp434D199.	chr1 31505143
NM_016505	NM_016505	Nucleolar protein of 40 kDa (pNO40) (Zinc finger CCHC domain- containing protein 7) (Putative S1 RNA binding domain protein) (PS1D protein) (Pnn-interacting nucleolar protein).	chr1 31542428
BC007446	BC007446	n/a	chr1 31542479
NM_004102	NM_004102	Fatty acid-binding protein, heart (H-FABP) (Heart-type fatty acid- binding protein) (Muscle fatty acid-binding protein) (M-FABP) (Mammary-derived growth inhibitor) (MDGI).	chr1 31610686
NM_178865	NM_178865	Serine incorporator 2 (Tumor differentially expressed 2-like).	chr1 31658549
BC084580	BC084580	TDE2L protein.	chr1 31658661
NM_022164	NM_022164	Tubulointerstitial nephritis antigen-like precursor (Tubulointerstitial nephritis antigen-related protein) (TIN Ag-related protein) (TIN-Ag-RP) (Glucocorticoid-inducible protein 5) (Oxidized LDL-responsive gene 2 protein) (OLRG-2).	chr1 31814746
AK074124	AK074124	n/a	chr1 31815221
NM_001525	NM_001525	Orexin receptor type 1 (Ox1r) (Hypocretin receptor type 1).	chr1 31857227
NM_012392	NM_012392	Peflin (Hypothetical protein FLJ10558) (PEF1 protein) (Penta-EF hand domain containing 1) (PEF) (ABP32).	chr1 31868057
NM_001856	M92642	Collagen alpha-1(XVI) chain precursor.	chr1 31890434
NM_001856	NM_001856	Collagen alpha-1(XVI) chain precursor.	chr1 31890434
AB209571	AB209571	FP1572.	chr1 31890688
NM_001703	AB005298	Brain-specific angiogenesis inhibitor 2.	chr1 31965305
NM_001703	NM_001703	Brain-specific angiogenesis inhibitor 2 precursor.	chr1 31965305
NM_144569	AK131447	Hypothetical protein FLJ25348.	chr1 32028611
NM_144569	AK131447	Hypothetical protein FLJ33697 (Novel protein).	chr1 32028611
NM_144569	NM_144569	Novel protein.	chr1 32028611
NM_144569	AK091016	Hypothetical protein FLJ25348.	chr1 32028619
NM_144569	AK091016	Hypothetical protein FLJ33697 (Novel protein).	chr1 32028619
AK096192	AK096192	Hypothetical protein FLJ38873.	chr1 32032703
AK096192	AK097227	Hypothetical protein FLJ39908.	chr1 32032703
BC070182	BC070182	Protein tyrosine phosphatase type IVA protein 2 (EC 3.1.3.48) (Protein-tyrosine phosphatase 4a2) (Protein-tyrosine phosphatase of regenerating liver-2) (PRL-2) (PTP(CAAXII)) (HU-PP-1) (OV-1).	chr1 32146441
AF118078	AF118078	PRO1848.	chr1 32151764
NM_006559	AK091346	n/a	chr1 32252053
NM_006559	NM_006559	KH domain containing, RNA binding, signal transduction associated protein 1 (p21 Ras GTPase-activating protein-associated p62) (GAP- associated tyrosine phosphoprotein p62) (Src-associated in mitosis 68 kDa protein) (Sam68) (p68).	chr1 32252077
NM_006559	BC010132	KH domain containing, RNA binding, signal transduction associated protein 1 (p21 Ras GTPase-activating protein-associated p62) (GAP- associated tyrosine phosphoprotein p62) (Src-associated in mitosis 68 kDa protein) (Sam68) (p68).	chr1 32252113
NM_018056	AK023331	Novel protein (Fragment).	chr1 32311089
NM_018056	NM_018056	TMEM39B protein.	chr1 32311115
NM_018056	BC004364	TMEM39B protein.	chr1 32311130
NM_018056	CR590417	Hypothetical protein DKFZp564C2082 (Hypothetical protein FLJ13269) (FLJ10315 protein) (Novel protein).	chr1 32311139
NM_018056	CR590417	Hypothetical protein FLJ10315.	chr1 32311139
NM_012316	NM_012316	Importin alpha-7 subunit (Karyopherin alpha-6).	chr1 32346243
NM_175852	NM_175852	Alpha-taxilin.	chr1 32417931
BC046565	BC046565	Hypothetical protein DKFZp667F1912 (Fragment).	chr1 32431460
NM_024296	NM_024296	Coiled-coil domain containing 28B (Novel protein).	chr1 32438820
NM_024296	BC022848	CCDC28B protein (Novel protein).	chr1 32438839
NM_018134	NM_018134	Hypothetical protein FLJ10547.	chr1 32443858
NM_018134	BC098250	IQCC protein.	chr1 32443859
AK075260	AK075260	Hypothetical protein FLJ90779.	chr1 32451541
NM_019118	BC001256	PP1065 (C1orf91 protein).	chr1 32452665
NM_019118	NM_019118	PP1065 (C1orf91 protein).	chr1 32452665
AY358586	AY358586	AASL548 (Novel protein).	chr1 32454386
AY358586	BC004885	PP1065 (C1orf91 protein).	chr1 32454386
NM_003757	NM_003757	Eukaryotic translation initiation factor 3 subunit 2 (eIF-3 beta) (eIF3 p36) (eIF3i) (TGF-beta receptor-interacting protein 1) (TRIP-1).	chr1 32460557
BC003140	BC003140	PRO2242.	chr1 32460724
NM_032648	NM_032648	Hypothetical protein C1orf90.	chr1 32485420
NM_005356	U23852	Proto-oncogene tyrosine-protein kinase LCK (EC 2.7.1.112) (p56-LCK) (Lymphocyte cell-specific protein-tyrosine kinase) (LSK) (T cell- specific protein-tyrosine kinase).	chr1 32489505
NM_005356	NM_005356	Proto-oncogene tyrosine-protein kinase LCK (EC 2.7.1.112) (p56-LCK) (Lymphocyte cell-specific protein-tyrosine kinase) (LSK) (T cell- specific protein-tyrosine kinase).	chr1 32489518
BC013200	BC013200	Proto-oncogene tyrosine-protein kinase LCK (EC 2.7.1.112) (p56-LCK) (Lymphocyte cell-specific protein-tyrosine kinase) (LSK) (T cell- specific protein-tyrosine kinase).	chr1 32512319
NM_004964	NM_004964	Histone deacetylase 1 (HD1).	chr1 32530294
NM_023009	NM_023009	MARCKS-related protein (MARCKS-like protein 1) (Macrophage myristoylated alanine-rich C kinase substrate) (Mac-MARCKS) (MacMARCKS).	chr1 32572027
NM_052841	NM_052841	Testis-specific serine/threonine-protein kinase 3 (EC 2.7.1.37) (TSSK- 3) (Testis-specific kinase 3) (TSK-3) (Serine/threonine-protein kinase 22C).	chr1 32600448
BC026322	AK021440	Hypothetical protein FLJ11378.	chr1 32603293
BC026322	BC028381	Hypothetical protein FLJ10276 (BSDC1 protein) (Novel protein).	chr1 32603293
BC026322	BC026322	BSDC1 protein.	chr1 32603300
NM_018045	BX641056	Hypothetical protein DKFZp686B09139.	chr1 32603373
NM_018045	NM_018045	Hypothetical protein DKFZp686H02133 (Novel protein).	chr1 32603373
AY358230	AY358230	LSPQ2494.	chr1 32606233
NM_144621	NM_144621	Zinc finger and BTB domain-containing protein 8.	chr1 32703244
BC015239	AY157873	BTB/POZ and zinc-finger domain containing factor variant L (Zinc finger and BTB domain containing 8).	chr1 32777616
BC015239	BC015239	BTB/POZ and zinc-finger domain containing factor variant L (Zinc finger and BTB domain containing 8).	chr1 32777664
AY158005	AY158005	Archease-like protein isoform ABAC.	chr1 32838359
NM_178547	NM_178547	Archease (ARCH) (Fragment).	chr1 32859893
BC058843	BC058843	Archease (ARCH) (Fragment).	chr1 32860019
NM_005610	NM_005610	Chromatin assembly factor 1 subunit C (CAF-1 subunit C) (Chromatin assembly factor I p48 subunit) (CAF-I 48 kDa subunit) (CAF-Ip48) (Retinoblastoma binding protein p48) (Retinoblastoma-binding protein 4) (RBBP-4) (MSI1 protein homolog).	chr1 32889410
NM_030786	NM_030786	Hypothetical protein FLJ21054.	chr1 32918564
NM_020888	NM_020888	Hypothetical protein DKFZp727C231 (Fragment).	chr1 33003854
NM_003680	NM_003680	Tyrosyl-tRNA synthetase, cytoplasmic (EC 6.1.1.1) (Tyrosyl--tRNA ligase) (TyrRS).	chr1 33013426
NM_001017406	NM_001017406	Hypothetical protein DKFZp313K2325.	chr1 33055762
NM_001017406	NM_022753	Hypothetical protein DKFZp313K2325.	chr1 33055762
NM_001017406	BX647667	Hypothetical protein DKFZp313K2325.	chr1 33055779
AK022965	AK022965	Hypothetical protein FLJ12903.	chr1 33064689
NM_153756	NM_153756	Hypothetical protein FLJ34783.	chr1 33100463
BC062297	BC062297	FNDC5 protein.	chr1 33102641
NM_002143	NM_002143	Neuron-specific calcium-binding protein hippocalcin (Calcium-binding protein BDR-2).	chr1 33124684
NM_033504	BC023260	TMEM54 protein.	chr1 33132782
NM_033504	NM_033504	CAC1.	chr1 33132782
NM_153341	NM_153341	Hypothetical protein FLJ90005.	chr1 33174633
NM_153341	AK131439	IBR domain-containing protein 3.	chr1 33174643
NM_153341	BC062374	IBR domain containing 3.	chr1 33174643
NM_013411	NM_013411	Adenylate kinase 2, isoform b.	chr1 33246172
NM_001625	NM_001625	Adenylate kinase isoenzyme 2, mitochondrial (EC 2.7.4.3) (ATP-AMP transphosphorylase).	chr1 33251169
NM_052998	NM_052998	Arginine decarboxylase (EC 4.1.1.19) (ARGDC) (ADC) (Ornithine decarboxylase-like protein) (ODC-paralogue) (ODC-p).	chr1 33319300
NM_018207	NM_018207	Hypothetical protein FLJ10759.	chr1 33383590
NM_018207	AX775829	Tripartite motif-containing 62.	chr1 33383595
NM_018207	AX775829	Tripartite motif-containing 62.	chr1 33383595
AK125034	AK125034	Hypothetical protein FLJ43044.	chr1 33401038
NM_152493	NM_152493	Novel protein.	chr1 33494760
NM_198040	AJ419231	n/a	chr1 33561813
NM_198040	NM_198040	Polyhomeotic-like protein 2 (hPH2) (Early development regulatory protein 2).	chr1 33561813
NM_145238	AK131405	Zinc finger protein 31 (Zinc finger protein KOX29) (Zinc finger and SCAN domain containing protein 20) (Zinc finger protein 360).	chr1 33710832
NM_145238	NM_145238	Zinc finger protein 31 (Zinc finger protein KOX29) (Zinc finger and SCAN domain containing protein 20) (Zinc finger protein 360).	chr1 33710845
NM_145238	BC011404	ZNF31 protein.	chr1 33710858
NM_052896	NM_052896	CUB and sushi multiple domains protein 2.	chr1 33752195
NM_052896	AB212622	CSMD2 protein.	chr1 33752199
AK127722	AK127722	CUB and Sushi multiple domains 2.	chr1 33829993
AK122603	AK122603	CUB and Sushi multiple domains 2.	chr1 33836875
BC031871	BC031871	CUB and Sushi multiple domains 2.	chr1 34010295
NM_145205	AK097707	HMG2 like, isoform 2.	chr1 34098662
NM_145205	NM_145205	HMG2 like, isoform 2.	chr1 34098662
NM_001008728	NM_001008728	HMG2 like, isoform 2.	chr1 34102217
NM_032884	NM_032884	Hypothetical protein C1orf94.	chr1 34415857
NM_005268	NM_005268	Gap junction beta-5 protein (Connexin-31.1) (Cx31.1).	chr1 34993307
NM_153212	NM_153212	Gap junction beta-4 protein (Connexin-30.3) (Cx30.3).	chr1 34999364
NM_024009	NM_024009	Gap junction beta-3 protein (Connexin-31) (Cx31).	chr1 35019376
NM_002060	NM_002060	Gap junction alpha-4 protein (Connexin-37) (Cx37).	chr1 35031185
NM_138428	NM_138428	CDNA FLJ90372 fis, clone NT2RP2004556.	chr1 35091710
BC034598	BC034598	LOC113444 protein.	chr1 35093241
BC042172	BC042172	Hypothetical protein.	chr1 35212546
NM_007167	NM_007167	Zinc finger MYM-type protein 6 (Zinc finger protein 258).	chr1 35219720
NM_007167	BC029439	ZMYM6 protein.	chr1 35219722
AB037774	AB037774	Hypothetical protein FLJ10065.	chr1 35225169
BC007070	BC007070	Hypothetical protein DKFZp762A1615 (Zinc finger protein 258).	chr1 35256700
BC037313	BC037313	Zinc finger MYM-type protein 1.	chr1 35317578
BC037313	BC037313	Novel protein.	chr1 35317578
BC037313	BC037313	Hypothetical protein FLJ23151.	chr1 35317578
NM_005066	NM_005066	Splicing factor, proline-and glutamine-rich (Polypyrimidine tract- binding protein-associated splicing factor) (PTB-associated splicing factor) (PSF) (DNA-binding p52/p100 complex, 100 kDa subunit) (100-kDa DNA-pairing protein) (hPOMp100).	chr1 35421789
NM_005095	NM_005095	Zinc finger protein 262 (Fragment).	chr1 35507154
NM_024874	NM_024874	Polycystic kidney disease 1-like (PKD1-like) (Fragment).	chr1 35671678
AK090878	BC014530	Hypothetical protein FLJ14225.	chr1 35672285
AK090878	BC014530	Hypothetical protein.	chr1 35672285
AK090878	AK090878	Hypothetical protein FLJ33559.	chr1 35672292
NM_182686	NM_182686	Polycystic kidney disease 1-like (PKD1-like) (Fragment).	chr1 35676729
NM_001014841	NM_001014841	Neurochondrin-2.	chr1 35795979
NM_001014841	NM_014284	Neurochondrin-1 (Neurochondrin).	chr1 35795979
NM_178548	BC041175	Transcription factor AP-2 epsilon (Activating enhancer binding protein 2 epsilon).	chr1 35811557
NM_178548	NM_178548	Transcription factor AP-2 epsilon (Activating enhancer binding protein 2 epsilon).	chr1 35811557
NM_002794	NM_002794	Proteasome subunit beta type 2 (EC 3.4.25.1) (Proteasome component C7- I) (Macropain subunit C7-I) (Multicatalytic endopeptidase complex subunit C7-I).	chr1 35841326
NM_152374	NM_152374	Hypothetical protein FLJ39147.	chr1 35952063
NM_152374	BC026909	Hypothetical protein FLJ39147.	chr1 35952066
AF297866	AF297866	Claspin (hClaspin) (Hu-Claspin).	chr1 35958406
NM_022111	NM_022111	Claspin (hClaspin) (Hu-Claspin).	chr1 35974406
NM_017629	AB046787	Hypothetical protein FLJ20033.	chr1 36046414
NM_017629	NM_017629	Eukaryotic translation initiation factor 2C 4 (eIF2C 4) (eIF-2C 4) (Argonaute-4).	chr1 36046414
NM_012199	NM_012199	Eukaryotic translation initiation factor 2C 1 (eIF2C 1) (eIF-2C 1) (Argonaute-1) (Putative RNA-binding protein Q99).	chr1 36121396
NM_012199	BC063275	Eukaryotic translation initiation factor 2C, 1.	chr1 36121402
BC066888	BC066888	EIF2C3 protein.	chr1 36169269
NM_024852	NM_024852	Eukaryotic translation initiation factor 2C 3 (eIF2C 3) (eIF-2C 3) (Argonaute-3).	chr1 36169358
NM_024852	NM_177422	Eukaryotic translation initiation factor 2C, 3.	chr1 36169358
NM_014466	NM_014466	Tektin-2 (Testicular tektin) (Tektin-t) (Testicular tektin B1-like protein) (Tektin-B1) (TEKTB1).	chr1 36322262
NM_017825	NM_017825	Hypothetical protein FLJ20446 (ADP-ribosyl-hydrolase precursor) (Ecto- ADP-ribosylhydrolase precursor) (ADP-ribosylhydrolase like 2).	chr1 36327072
NM_005202	AK074129	COL8A2 protein.	chr1 36333432
NM_005202	NM_005202	Collagen alpha-2(VIII) chain precursor (Endothelial collagen).	chr1 36333432
BC096296	BC096296	COL8A2 protein.	chr1 36335695
NM_014408	NM_014408	Trafficking protein particle complex subunit 3 (BET3 homolog).	chr1 36374761
NM_018067	BC106053	Hypothetical protein FLJ10350.	chr1 36394389
NM_018067	NM_018067	Hypothetical protein RPRC1.	chr1 36394389
AK095939	AK095939	Hypothetical protein FLJ38620.	chr1 36415656
BC003083	BC003083	Hypothetical protein FLJ10350.	chr1 36416078
NM_005119	NM_005119	Thyroid hormone receptor-associated protein complex 150 kDa component (Trap150) (Thyroid hormone receptor associated protein 3).	chr1 36462633
NM_024676	NM_024676	C1orf113 protein (Fragment).	chr1 36545304
BC048273	BC048273	Hypothetical protein FLJ22938.	chr1 36558317
NM_018166	NM_018166	Hypothetical protein FLJ10647 (Hypothetical protein C1orf78) (Novel protein).	chr1 36560218
AY240960	AY240960	Hypothetical protein.	chr1 36561921
NM_032017	NM_032017	Hypothetical protein FLJ90548.	chr1 36577811
NM_032017	AK131560	Hypothetical protein FLJ16807.	chr1 36577816
NM_032017	BC007835	Hypothetical protein FLJ90548.	chr1 36577816
NM_032017	BC008344	Hypothetical protein FLJ90567.	chr1 36577816
NM_032017	BC008344	Hypothetical protein FLJ90567.	chr1 36577816
NM_032017	AK024504	Ser/Thr-like kinase (MGC4796).	chr1 36577817
NM_032017	AK075048	Hypothetical protein FLJ90567.	chr1 36577817
NM_032881	NM_032881	U7 snRNA-associated Sm-like protein LSm10.	chr1 36631617
NM_145047	BC018069	C1orf102 protein.	chr1 36656094
NM_145047	NM_145047	Hypothetical protein FLJ25675.	chr1 36656094
NM_145047	AK098541	Hypothetical protein FLJ25675.	chr1 36656101
NM_031280	NM_031280	28S ribosomal protein S15, mitochondrial precursor (S15mt) (MRP-S15).	chr1 36693959
NM_000760	NM_000760	Granulocyte colony-stimulating factor receptor precursor (G-CSF-R) (CD114 antigen).	chr1 36704231
NM_000760	NM_156038	n/a	chr1 36704231
NM_000760	NM_156039	Granulocyte colony-stimulating factor receptor precursor (G-CSF-R) (CD114 antigen).	chr1 36704231
NM_000760	NM_172313	n/a	chr1 36704231
NM_000760	M59819	n/a	chr1 36704281
NM_000831	NM_000831	Glutamate receptor, ionotropic kainate 3 precursor (Glutamate receptor 7) (GluR-7) (GluR7) (Excitatory amino acid receptor 5) (EAA5).	chr1 37039200
AJ249210	AJ249210	Glutamate receptor, ionotropic, kainate 3 (Glutamate/kainate receptor subtype GluR7).	chr1 37042805
NM_025079	NM_025079	Hypothetical protein FLJ23231 (Hypothetical protein ZC3H12A).	chr1 37712739
NM_022756	NM_022756	Novel protein.	chr1 37730762
BC016328	BC016328	Novel protein.	chr1 37731373
BC043239	BC043239	Novel protein.	chr1 37731497
DQ099384	DQ099384	Sarcoma antigen NY-SAR-91.	chr1 37734071
NM_024700	NM_024700	Smad nuclear interacting protein 1.	chr1 37774731
NM_003462	NM_003462	Axonemal dynein light intermediate polypeptide 1 (Inner dynein arm light chain, axonemal) (hp28).	chr1 37795106
NM_003462	BC046117	Axonemal dynein light intermediate polypeptide 1 (Inner dynein arm light chain, axonemal) (hp28).	chr1 37795156
NM_013285	NM_013285	Nucleolar GTP-binding protein 2 (Autoantigen NGP-1).	chr1 37805004
NM_173640	NM_173640	Hypothetical protein FLJ40906.	chr1 37849537
NM_017850	BC018109	C1orf109 protein.	chr1 37919836
NM_017850	NM_017850	Hypothetical protein FLJ20508 (C1orf109 protein).	chr1 37919836
NM_018101	NM_018101	Hypothetical protein FLJ10468 (Hypothetical protein FLJ12042) (Hypothetical protein FLJ12544) (CDCA8 protein) (Cell division cycle associated 8) (Pluripotent embryonic stem cell-related protein 3).	chr1 37930745
NM_001004338	BC041360	EPHA10 protein.	chr1 37952147
NM_001004338	NM_001004338	Hypothetical protein FLJ16103.	chr1 37952147
NM_173641	NM_173641	Hypothetical protein FLJ33655.	chr1 37998544
NM_001031740	NM_001031740	Hypothetical protein MANEAL.	chr1 38032360
NM_152496	NM_152496	MANEAL protein (Fragment).	chr1 38033746
NM_024640	NM_024640	Dopamine receptor interacting protein 3 (Fragment).	chr1 38041200
NM_024640	BC080186	Hypothetical protein FLJ23476.	chr1 38041203
NM_024640	BC080186	Ischemia/reperfusion inducible protein transcript variant 1 (Ischemia/reperfusion inducible protein transcript variant 2) (YRDC protein).	chr1 38041203
BC016402	BC016402	Novel protein.	chr1 38045237
NM_198446	NM_198446	Hypothetical protein (Fragment).	chr1 38046555
NM_005955	NM_005955	Metal-regulatory transcription factor 1 (Transcription factor MTF-1) (MRE-binding transcription factor).	chr1 38052437
BC062317	BC062317	Type II inositol-1,4,5-trisphosphate 5-phosphatase precursor (EC 3.1.3.36) (Phosphoinositide 5-phosphatase) (5PTase) (75 kDa inositol polyphosphate-5-phosphatase).	chr1 38100345
AL833055	AL833055	Inositol polyphosphate-5-phosphatase, 75kDa.	chr1 38166800
NM_006802	NM_006802	Splicing factor 3A subunit 3 (Spliceosome associated protein 61) (SAP 61) (SF3a60).	chr1 38195240
NM_004468	BC001351	FHL3 protein.	chr1 38235030
NM_004468	NM_004468	Four and a half LIM domains protein 3 (FHL-3) (Skeletal muscle LIM- protein 2) (SLIM 2).	chr1 38235030
NM_016037	NM_016037	Probable U3 small nucleolar RNA-associated protein 11 (U3 snoRNA- associated protein 11).	chr1 38251000
NM_016037	AF067802	Probable U3 small nucleolar RNA-associated protein 11 (U3 snoRNA- associated protein 11).	chr1 38251006
NM_002699	NM_002699	POU domain, class 3, transcription factor 1 (Octamer-binding transcription factor 6) (Oct-6) (POU-domain transcription factor SCIP).	chr1 38282864
Z18284	Z18284	Transcriptional regulator (Fragment).	chr1 38283489
NM_022157	BC016668	Hypothetical protein FLJ13311.	chr1 39077607
NM_022157	NM_022157	Hypothetical protein FLJ13311.	chr1 39077607
NM_012333	NM_012333	C-Myc binding protein (Associate of Myc 1) (AMY-1).	chr1 39101223
NM_030772	NM_030772	Gap junction alpha-10 protein (Connexin-59) (Cx59) (Connexin-58) (Cx58).	chr1 39112325
NM_017821	AK123230	Hypothetical protein FLJ41236.	chr1 39124064
NM_017821	NM_017821	Rhomboid-related protein 2 (EC 3.4.21.105) (RRP2) (Rhomboid-like protein 2).	chr1 39124065
NM_024595	NM_024595	Hypothetical protein FLJ12666 (Novel protein).	chr1 39229503
NM_004552	NM_004552	NADH-ubiquinone oxidoreductase 15 kDa subunit (EC 1.6.5.3) (EC 1.6.99.3) (Complex I-15 kDa) (CI-15 kDa).	chr1 39264592
AK127519	AK127519	Hypothetical protein FLJ45612.	chr1 39506723
AK023285	AK023285	Macrophin 1 isoform (Fragment).	chr1 39706851
AY527403	AY527403	10kDa eEF1A interacting protein.	chr1 39718873
NM_181809	NM_181809	Bone morphogenetic protein 8A.	chr1 39729904
BC072388	BC072388	OXCT2 protein.	chr1 39753124
AK093659	AK093659	Hypothetical protein FLJ36340.	chr1 39760544
AK127199	AK127199	FLJ14351 protein.	chr1 39764917
AK024413	AK024413	FLJ14351 protein.	chr1 39766089
BC093743	BC093743	FLJ14351 protein.	chr1 39766326
NM_003819	NM_003819	Polyadenylate-binding protein 4 (Poly(A)-binding protein 4) (PABP 4) (Inducible poly(A)-binding protein) (iPABP) (Activated-platelet protein 1) (APP-1).	chr1 39799074
NM_003819	BC065540	Poly(A) binding protein, cytoplasmic 4 (Inducible form) (Fragment).	chr1 39799078
NM_003819	BC094755	Polyadenylate-binding protein 4 (Poly(A)-binding protein 4) (PABP 4) (Inducible poly(A)-binding protein) (iPABP) (Activated-platelet protein 1) (APP-1).	chr1 39799080
NM_014571	NM_014571	HEYL protein (Hairy/enhancer-of-split related with YRPW motif-like) (Hairy-related transcription factor 3).	chr1 39862411
NM_032526	AY028778	Cytosolic 5'-nucleotidase 1A (EC 3.1.3.5) (Cytosolic 5'-nucleotidase IA) (cN1A) (cN-IA) (cN-I).	chr1 39897379
NM_032526	NM_032526	Cytosolic 5'-nucleotidase 1A (EC 3.1.3.5) (Cytosolic 5'-nucleotidase IA) (cN1A) (cN-IA) (cN-I).	chr1 39897379
NM_016257	NM_016257	Hippocalcin-like protein 4 (HLP4).	chr1 39917238
NM_006112	NM_006112	Peptidyl-prolyl cis-trans isomerase E (EC 5.2.1.8) (PPIase E) (Rotamase E) (Cyclophilin E) (Cyclophilin 33).	chr1 39977116
NM_006112	NM_203456	Peptidylprolyl isomerase E (Cyclophilin E) (Fragment).	chr1 39977116
NM_006112	DQ160195	Cyclophilin-33B.	chr1 39977159
NM_001720	NM_001720	Bone morphogenetic protein 8B precursor (BMP-8B) (BMP-8) (Osteogenic protein 2) (OP-2).	chr1 39996489
BC108678	BC108678	Hypothetical protein.	chr1 40001809
NM_022120	NM_022120	Succinyl-CoA:3-ketoacid-coenzyme A transferase 2, mitochondrial precursor (EC 2.8.3.5) (Testis-specific succinyl CoA:3-oxoacid CoA- transferase) (SCOT-t).	chr1 40007784
NM_017646	BC107569	TRNA isopentenylpyrophosphate transferase isoform 3.	chr1 40079311
NM_017646	BC010741	TRNA isopentenylpyrophosphate transferase isoform 7.	chr1 40079313
NM_017646	BC010741	TRNA isopentenylpyrophosphate transferase isoform 5.	chr1 40079313
NM_017646	AK000068	TRNA isopentenylpyrophosphate transferase isoform 7.	chr1 40079314
NM_017646	NM_017646	tRNA isopentenyltransferase, mitochondrial precursor (EC 2.5.1.8) (Isopentenyl-diphosphate:tRNA isopentenyltransferase) (IPP transferase) (IPTase) (IPPT) (hGRO1).	chr1 40079314
AY702934	AY702934	TRNA isopentenylpyrophosphate transferase isoform 7.	chr1 40079972
AY702934	AY702935	TRNA isopentenylpyrophosphate transferase isoform 7.	chr1 40079972
AY702934	AY702936	TRNA isopentenylpyrophosphate transferase isoform 7.	chr1 40079972
AY702934	AY702944	TRNA isopentenylpyrophosphate transferase isoform 7.	chr1 40079972
NM_001033081	NM_001033081	L-myc-1 proto-oncogene protein.	chr1 40133684
NM_032793	BC011587	PP10484 (FP1147).	chr1 40193396
NM_032793	NM_032793	Novel protein (Fragment).	chr1 40193396
NM_032793	AK027396	Hypothetical protein FLJ14490.	chr1 40193406
NM_032793	AK093223	Novel protein (Fragment).	chr1 40193408
NM_006367	NM_006367	Adenylyl cyclase-associated protein 1 (CAP 1).	chr1 40279014
NM_000310	NM_000310	Palmitoyl-protein thioesterase 1 precursor (EC 3.1.2.22) (Palmitoyl- protein hydrolase 1).	chr1 40310970
NM_012421	NM_012421	Zinc finger protein Rlf (Rearranged L-myc fusion gene protein) (Zn-15 related protein).	chr1 40399647
NM_001008740	NM_001008740	Novel protein (Hypothetical protein TMCO2).	chr1 40486159
NM_005857	NM_005857	CAAX prenyl protease 1 homolog (EC 3.4.24.84) (Prenyl protein-specific endoprotease 1) (Farnesylated proteins-converting enzyme 1) (FACE-1) (Zinc metalloproteinase Ste24 homolog).	chr1 40496365
NM_001852	NM_001852	Collagen alpha-2(IX) chain precursor.	chr1 40538749
NM_022733	NM_022733	Novel protein (Fragment).	chr1 40612314
AL133206	AL133206	SMAP1L protein (Fragment).	chr1 40612935
NM_023070	NM_023070	Zinc finger protein 643.	chr1 40688365
BC041873	BC041873	ZNF642 protein.	chr1 40715473
NM_022774	NM_022774	Novel protein (Fragment).	chr1 40747019
NM_152373	NM_152373	Novel protein (Zinc finger protein 684).	chr1 40769819
NM_014747	NM_014747	Regulating synaptic membrane exocytosis protein 3 (Nim3) (Rab-3 interacting molecule 3) (RIM 3) (RIM3 gamma).	chr1 40858938
AK094323	AK094323	Hypothetical protein FLJ37004.	chr1 40928638
NM_014223	NM_014223	Nuclear transcription factor Y, gamma (Fragment).	chr1 40929951
NM_014223	CR608652	Nuclear transcription factor Y, gamma.	chr1 40929974
NM_014223	AB208975	Nuclear transcription factor Y, gamma.	chr1 40930001
AK127677	AK127677	Nuclear transcription factor Y, gamma.	chr1 40930271
AK000346	AK000346	Nuclear transcription factor Y, gamma (Fragment).	chr1 40947624
AF191744	AF191744	Nuclear transcription factor Y subunit gamma (Nuclear transcription factor Y subunit C) (NF-YC) (CAAT-box DNA-binding protein subunit C) (Transactivator HSM-1/2).	chr1 40977096
NM_004700	NM_004700	Potassium voltage-gated channel subfamily KQT member 4 (Voltage-gated potassium channel subunit Kv7.4) (Potassium channel alpha subunit KvLQT4) (KQT-like 4).	chr1 41022270
NM_004700	NM_172163	n/a	chr1 41022270
NM_133467	NM_133467	MRG2 (Transcriptional co-activator CITED4) (Cbp/p300-interacting transactivator, with Glu/Asp-rich carboxy-terminal domain, 4).	chr1 41099315
NM_001905	NM_001905	CTP synthase (EC 6.3.4.2) (UTP--ammonia ligase) (CTP synthetase).	chr1 41218029
AK097609	AK097609	Hypothetical protein FLJ40290 (Novel protein).	chr1 41253855
AK097609	BC037879	FLJ23878 protein.	chr1 41253855
AK097609	BC050353	FLJ23878 protein.	chr1 41253855
AK074458	AK074458	Hypothetical protein FLJ23878.	chr1 41257112
NM_001031694	BC009752	n/a	chr1 41265461
NM_001031694	NM_001031694	Polycomb protein SCMH1 (Sex comb on midleg homolog 1).	chr1 41265461
NM_001031694	AF149046	n/a	chr1 41265463
NM_001031694	AK023124	n/a	chr1 41265463
NM_001031694	NM_012236	n/a	chr1 41265463
NM_001956	NM_001956	Endothelin-2 precursor (ET-2) (Preproendothelin-2) (PPET2).	chr1 41717035
NM_024503	NM_024503	Kappa B and V(D)J recombination signal sequences binding protein.	chr1 41748271
AB046775	AB046775	Immunodeficiency virus type I enhancer binding protein 3.	chr1 41748468
NM_007102	NM_007102	Guanylate cyclase activator 2B precursor [Contains: Guanylate cyclase C-activating peptide 2 (Guanylate cyclase C-activating peptide II) (GCAP-II); Uroguanylin (UGN)].	chr1 42391678
NM_033553	NM_033553	Guanylin precursor (Guanylate cyclase activator 2A) (Guanylate cyclase-activating protein 1) (Gap-I) [Contains: HMW-guanylin; Guanylin].	chr1 42400948
NM_014947	NM_014947	Forkhead box protein J3.	chr1 42414797
NM_173642	NM_173642	Novel protein (Fragment).	chr1 42619068
NM_032257	NM_032257	Zinc finger MYND domain containing protein 12.	chr1 42668681
BC106064	BC106064	Phosphopantothenate--cysteine ligase (EC 6.3.2.5) (Phosphopantothenoylcysteine synthetase) (PPC synthetase).	chr1 42694801
BC106064	BC106064	Novel protein.	chr1 42694801
NM_025030	NM_025030	Hypothetical protein FLJ20972.	chr1 42720951
NM_006347	NM_006347	Peptidyl-prolyl cis-trans isomerase H (EC 5.2.1.8) (PPIase H) (Rotamase H) (U-snRNP-associated cyclophilin SnuCyp-20) (USA-CYP) (Small nuclear ribonucleoprotein particle-specific cyclophilin H) (CypH).	chr1 42896634
NM_004559	NM_004559	Nuclease sensitive element binding protein 1 (Y-box binding protein 1) (Y-box transcription factor) (YB-1) (CCAAT-binding transcription factor I subunit A) (CBF-A) (Enhancer factor I subunit A) (EFI-A) (DNA-binding protein B) (DBPB).	chr1 42920710
NM_148960	NM_148960	Claudin-19.	chr1 42971350
BC030524	BC030524	Claudin-19.	chr1 42973254
NM_022356	AF097431	GROS1-S protein.	chr1 42984632
NM_022356	AK027697	Leucine proline-enriched proteoglycan (Leprecan) 1.	chr1 42984632
NM_022356	AK027697	Leucine proline-enriched proteoglycan (Leprecan) 1.	chr1 42984632
NM_022356	BC108311	Hypothetical protein.	chr1 42984632
NM_022356	NM_022356	Hypothetical protein FLJ14742.	chr1 42984632
NM_024097	NM_024097	Chromosome 1 open reading frame 50.	chr1 43005526
NM_199342	NM_199342	Coiled-coil domain containing 23 (Novel protein).	chr1 43045319
NM_001017922	NM_001017922	Erythroblast membrane-associated protein.	chr1 43055362
BC099707	BC099707	Erythroblast membrane-associated protein.	chr1 43063897
NM_015911	NM_015911	Hypothetical protein (ZNF691 protein) (LOC51058 protein) (Novel protein).	chr1 43084866
AK000938	AK000938	Hypothetical protein FLJ10076.	chr1 43087812
NM_006516	NM_006516	Solute carrier family 2, facilitated glucose transporter member 1 (Glucose transporter type 1, erythrocyte/brain) (HepG2 glucose transporter).	chr1 43164105
NM_006824	NM_006824	Probable rRNA-processing protein EBP2 (EBNA1 binding protein 2) (Nucleolar protein p40).	chr1 43402442
NM_152498	NM_152498	Hypothetical protein FLJ32000.	chr1 43410612
AK096139	AK096139	Hypothetical protein FLJ38820.	chr1 43478458
NM_144626	NM_144626	Hypothetical protein MGC17299.	chr1 43508993
NM_182517	NM_182517	Hypothetical protein MGC52423.	chr1 43520145
NM_005424	BC038239	Hypothetical protein.	chr1 43539250
NM_005424	NM_005424	Tyrosine-protein kinase receptor Tie-1 precursor (EC 2.7.1.112).	chr1 43539250
NM_005373	NM_005373	Thrombopoietin receptor precursor (TPO-R) (Myeloproliferative leukemia protein) (C-mpl) (CD110 antigen).	chr1 43576061
NM_005373	M90103	Myeloproliferative leukemia virus oncogene.	chr1 43576106
NM_001255	NM_001255	Cell division cycle protein 20 homolog (p55CDC).	chr1 43597214
NM_022821	BC095456	ELOVL1 protein.	chr1 43601659
NM_022821	NM_022821	Elongation of very long chain fatty acids protein 1.	chr1 43601659
NM_001001651	NM_001001651	Mediator of RNA polymerase II transcription subunit 8 homolog (Activator-recruited cofactor 32 kDa component) (ARC32).	chr1 43622175
NM_001001651	NM_052877	OTTHUMP00000008573.	chr1 43622175
NM_001001651	NM_201542	OTTHUMP00000008573.	chr1 43622175
NM_001001654	NM_001001654	Mediator of RNA polymerase II transcription subunit 8 homolog (Activator-recruited cofactor 32 kDa component) (ARC32).	chr1 43622984
NM_001012960	NM_001012960	FLJ00408 protein (Fragment).	chr1 43628142
NM_001012960	NM_001012961	Novel protein (LOC149469) (RP11-506B15.1 protein, isoform 2).	chr1 43628142
NM_001012960	NM_182518	Hypothetical protein FLJ34502 (Novel protein) (LOC149469).	chr1 43628142
NM_015284	NM_015284	KIAA0467 protein (Fragment).	chr1 43661383
BC052802	BC052802	KIAA0467 protein.	chr1 43681317
BC052802	BC052802	KIAA0467 protein.	chr1 43681317
AK126972	AK126972	Novel protein (HT036).	chr1 43683509
NM_031207	AY037165	Novel protein (HT036).	chr1 43689415
NM_031207	BC019041	Novel protein (HT036).	chr1 43689415
NM_031207	NM_031207	Novel protein (HT036).	chr1 43689415
NM_031207	AK096244	Novel protein (HT036).	chr1 43689417
NM_002840	NM_002840	Receptor-type tyrosine-protein phosphatase F precursor (EC 3.1.3.48) (LAR protein) (Leukocyte antigen related).	chr1 43769133
NM_002840	Y00815	Protein tyrosine phosphatase, receptor type, F.	chr1 43769133
NM_002840	BC048768	Receptor-type tyrosine-protein phosphatase F precursor (EC 3.1.3.48) (LAR protein) (Leukocyte antigen related).	chr1 43769147
NM_002840	BC048768	Receptor-type tyrosine-protein phosphatase F precursor (EC 3.1.3.48) (LAR protein) (Leukocyte antigen related).	chr1 43769147
NM_002840	BC048416	PTPRF protein (Protein tyrosine phosphatase, receptor type, F).	chr1 43769160
BC012102	BC012102	PTPRF protein (Protein tyrosine phosphatase, receptor type, F).	chr1 43776455
NM_014663	NM_014663	Jumonji domain-containing protein 2A.	chr1 43888424
NM_006279	NM_006279	CMP-N-acetylneuraminate-beta-1,4-galactoside alpha-2,3- sialyltransferase (EC 2.4.99.6) (N-acetyllactosaminide alpha-2,3- sialyltransferase) (Gal beta-1,3(4) GlcNAc alpha-2,3 sialyltransferase) (ST3N) (ST3GalIII) (Sialyltransferase 6).	chr1 43945804
NM_006279	NM_174963	CMP-N-acetylneuraminate-beta-1,4-galactoside alpha-2,3- sialyltransferase (EC 2.4.99.6) (N-acetyllactosaminide alpha-2,3- sialyltransferase) (Gal beta-1,3(4) GlcNAc alpha-2,3 sialyltransferase) (ST3N) (ST3GalIII) (Sialyltransferase 6).	chr1 43945804
NM_006279	NM_174964	CMP-N-acetylneuraminate-beta-1,4-galactoside alpha-2,3- sialyltransferase (EC 2.4.99.6) (N-acetyllactosaminide alpha-2,3- sialyltransferase) (Gal beta-1,3(4) GlcNAc alpha-2,3 sialyltransferase) (ST3N) (ST3GalIII) (Sialyltransferase 6).	chr1 43945804
NM_006279	NM_174965	Sialyltransferase 6 (N-acetyllacosaminide alpha 2,3- sialyltransferase).	chr1 43945804
NM_006279	NM_174966	Sialyltransferase 6 (N-acetyllacosaminide alpha 2,3- sialyltransferase).	chr1 43945804
NM_006279	NM_174967	Sialyltransferase 6 (N-acetyllacosaminide alpha 2,3- sialyltransferase).	chr1 43945804
NM_006279	NM_174968	CMP-N-acetylneuraminate-beta-1,4-galactoside alpha-2,3- sialyltransferase (EC 2.4.99.6) (N-acetyllactosaminide alpha-2,3- sialyltransferase) (Gal beta-1,3(4) GlcNAc alpha-2,3 sialyltransferase) (ST3N) (ST3GalIII) (Sialyltransferase 6).	chr1 43945804
NM_006279	NM_174969	Sialyltransferase 6 (N-acetyllacosaminide alpha 2,3- sialyltransferase).	chr1 43945804
NM_006279	NM_174971	Sialyltransferase 6 (N-acetyllacosaminide alpha 2,3- sialyltransferase).	chr1 43945804
NM_006279	NM_174972	Sialyltransferase 6 (N-acetyllacosaminide alpha 2,3- sialyltransferase).	chr1 43945804
AF425863	AF425863	Sialyltransferase 6 (N-acetyllacosaminide alpha 2,3- sialyltransferase).	chr1 43974520
AF425863	AF425865	Sialyltransferase 6 (N-acetyllacosaminide alpha 2,3- sialyltransferase).	chr1 43974520
AF425863	AF425866	Sialyltransferase 6 (N-acetyllacosaminide alpha 2,3- sialyltransferase).	chr1 43974520
AF425863	AF425867	Sialyltransferase 6 (N-acetyllacosaminide alpha 2,3- sialyltransferase).	chr1 43974520
AF425863	AF425868	n/a	chr1 43974520
AF425863	AY167994	Sialyltransferase 6 (N-acetyllacosaminide alpha 2,3- sialyltransferase).	chr1 43974520
NM_057091	NM_057091	Neurotrophic factor artemin (Pre-pro-neublastin) (Pre-pro-enovin precursor).	chr1 44171578
NM_057090	NM_057090	Neurotrophic factor artemin (Pre-pro-neublastin) (Pre-pro-enovin precursor).	chr1 44173887
NM_057160	NM_057160	Artemin.	chr1 44174240
NM_014652	NM_014652	Importin-13 (Imp13) (Ran-binding protein 13) (RanBP13) (Karyopherin 13) (Kap13).	chr1 44185229
AK091565	AK091565	Importin 13.	chr1 44204197
NM_001384	NM_001384	Diphthamide biosynthesis protein 2, isoform a (Diptheria toxin resistance protein required for diphthamide biosynthesis-like 2) (S. cerevisiae) (DPH2-like 2).	chr1 44208245
NM_004047	NM_004047	Vacuolar ATP synthase 21 kDa proteolipid subunit (EC 3.6.3.14) (HATPL).	chr1 44213197
NM_003780	NM_003780	Beta-1,4-galactosyltransferase 2 (EC 2.4.1.-) (Beta-1,4-GalTase 2) (Beta4Gal-T2) (b4Gal-T2) (UDP-galactose:beta-N-acetylglucosamine beta- 1,4-galactosyltransferase 2) (UDP-Gal:beta-GlcNAc beta-1,4- galactosyltransferase 2) [Includes: Lactose synthase A pr	chr1 44217452
BC002431	BC002431	n/a	chr1 44217694
NM_152499	NM_152499	Hypothetical protein DKFZp686L05178 (Fragment).	chr1 44229866
NM_001024845	NM_001024845	Solute carrier family 6 (Neurotransmitter transporter, glycine), member 9.	chr1 44234742
NM_001024845	NM_006934	Solute carrier family 6 (Neurotransmitter transporter, glycine), member 9.	chr1 44234742
NM_001024845	NM_201649	Sodium- and chloride-dependent glycine transporter 1 (GlyT1) (GlyT-1) (Solute carrier family 6 member 9).	chr1 44234742
NM_173484	NM_173484	Zinc finger protein 393.	chr1 44357108
NM_019100	NM_019100	DNA methyltransferase 1-associated protein 1 (DNMT1-associated protein 1) (DNMAP1).	chr1 44451711
NM_024066	NM_024066	Hypothetical protein (Fragment).	chr1 44459329
NM_024066	BC001072	PRNPIP protein.	chr1 44459352
NM_024066	CR621093	PRNPIP protein.	chr1 44459372
NM_024066	CR621093	Prion protein interacting protein.	chr1 44459372
NM_018150	BC034221	HSPC246.	chr1 44643546
NM_018150	NM_018150	Novel protein (Hypothetical protein C1orf164).	chr1 44643546
AK001459	AK001459	Hypothetical protein FLJ10597.	chr1 44870599
CR608781	CR608781	Novel DUF829 domain-containing protein.	chr1 44873525
NM_024587	BC064520	Hypothetical protein DKFZp547P2316.	chr1 44892088
NM_024587	NM_024587	Hypothetical protein DKFZp547P2316.	chr1 44892088
NM_001004307	NM_001004307	Hypothetical protein MGC33556.	chr1 44912980
NM_006845	BC008764	Kinesin-like protein KIF2C (Mitotic centromere-associated kinesin) (MCAK) (Kinesin-like protein 6).	chr1 44978137
NM_006845	NM_006845	Kinesin-like protein KIF2C (Mitotic centromere-associated kinesin) (MCAK) (Kinesin-like protein 6).	chr1 44978137
AY026505	AY026505	Kinesin family member 2C.	chr1 44984671
NM_001012	NM_001012	40S ribosomal protein S8.	chr1 45013832
NM_153274	NM_153274	Bestrophin-3 (Vitelliform macular dystrophy 2-like protein 2).	chr1 45021845
NM_004073	NM_004073	Serine/threonine-protein kinase PLK3 (EC 2.7.1.37) (Polo-like kinase 3) (PLK-3) (Cytokine-inducible serine/threonine-protein kinase) (FGF- inducible kinase) (Proliferation-related kinase).	chr1 45038622
NM_001013632	NM_001013632	Novel Tctex-1 family domain-containing protein (Hypothetical protein LOC343521).	chr1 45044176
AF119569	AF119569	n/a	chr1 45058947
AY359016	AY359016	Patched protein homolog 2 (PTC2).	chr1 45060524
NM_020365	BC018728	Eukaryotic translation initiation factor 2B, subunit 3 gamma, 58kDa (Fragment).	chr1 45088999
NM_020365	NM_020365	Translation initiation factor eIF-2B gamma subunit (eIF-2B GDP-GTP exchange factor).	chr1 45089036
NM_020365	AK022399	Translation initiation factor eIF-2B gamma subunit (eIF-2B GDP-GTP exchange factor).	chr1 45089038
AL834288	AL834288	Eukaryotic translation initiation factor 2B, subunit 3 gamma, 58kDa.	chr1 45112789
AK095730	AK095730	Hypothetical protein FLJ38411.	chr1 45121206
NM_024602	NM_024602	Hypothetical protein FLJ21156 (HECTD3 protein).	chr1 45240800
NM_024602	AK056873	Novel protein.	chr1 45240807
NM_024602	BC019105	Hypothetical protein FLJ21156 (HECTD3 protein).	chr1 45240807
NM_000374	NM_000374	Uroporphyrinogen decarboxylase (EC 4.1.1.37) (URO-D) (UPD).	chr1 45250416
AB040944	AB040944	Zinc finger SWIM domain containing protein 5.	chr1 45254664
NM_032756	NM_032756	Glyoxalase domain containing 1 (Novel protein).	chr1 45565131
NM_012222	AB032921	MutY homolog (E. coli) (Fragment).	chr1 45567500
NM_012222	AB032924	MutY homolog (E. coli) (Fragment).	chr1 45567500
NM_012222	AB032927	MYHbeta (Fragment).	chr1 45567500
NM_012222	BC003178	n/a	chr1 45567500
NM_012222	BC003178	n/a	chr1 45567500
NM_012222	BC003178	MutY homolog (E. coli) (Fragment).	chr1 45567500
NM_012222	NM_012222	A/G-specific adenine DNA glycosylase (EC 3.2.2.-) (MutY homolog) (hMYH).	chr1 45567500
BC009364	BC009364	Target of EGR1, member 1 (Nuclear).	chr1 45578494
NM_007170	AK027573	Dual specificity testis-specific protein kinase 2 (EC 2.7.1.37) (EC 2.7.1.112) (Testicular protein kinase 2).	chr1 45582141
NM_007170	BC033085	Testis-specific kinase 2.	chr1 45582141
NM_007170	NM_007170	Dual specificity testis-specific protein kinase 2 (EC 2.7.1.37) (EC 2.7.1.112) (Testicular protein kinase 2).	chr1 45582142
NM_015506	NM_015506	Methylmalonic aciduria and homocystinuria type C protein.	chr1 45738577
NM_015506	BC006122	Methylmalonic aciduria and homocystinuria type C protein.	chr1 45738599
NM_002574	NM_002574	Peroxiredoxin 1 (EC 1.11.1.15) (Thioredoxin peroxidase 2) (Thioredoxin-dependent peroxide reductase 2) (Proliferation-associated protein PAG) (Natural killer cell-enhancing factor A) (NKEF-A).	chr1 45749294
NM_006066	NM_006066	Alcohol dehydrogenase [NADP+] (EC 1.1.1.2) (Aldehyde reductase) (Aldo- keto reductase family 1 member A1).	chr1 45789084
NM_002482	NM_002482	Nuclear autoantigenic sperm protein (NASP).	chr1 45822303
NM_002482	NM_152298	Nuclear autoantigenic sperm protein autosomal variant (Fragment).	chr1 45822303
NM_002482	NM_172164	Nuclear autoantigenic sperm protein (NASP).	chr1 45822303
NM_002482	BC011580	PRO1999.	chr1 45822320
NM_152500	NM_152500	Hypothetical protein FLJ33084.	chr1 45858303
NM_021639	NM_021639	Hypothetical protein DKFZp434H1428 (Hypothetical protein GPBP1L1) (Hypothetical protein SP192) (Novel protein).	chr1 45865567
BC064539	BC064539	Novel protein.	chr1 45926450
BC064539	BC064539	Hypothetical protein.	chr1 45926450
BC032544	BC032544	Intracisternal A particle-promoted polypeptide (Fragment).	chr1 45932586
NM_005897	NM_005897	Actin-binding protein IPP (MIPP protein).	chr1 45936995
BC065499	AB047005	Microtubule-associated serine/threonine-protein kinase 2 (EC 2.7.1.37).	chr1 46041871
BC065499	BC065499	Microtubule-associated serine/threonine-protein kinase 2 (EC 2.7.1.37).	chr1 46041897
NM_003629	NM_003629	Phosphatidylinositol 3-kinase regulatory gamma subunit (PI3-kinase p85-gamma subunit) (PtdIns-3-kinase p85-gamma) (p55PIK).	chr1 46278400
AF028785	AF028785	Phosphoinositide-3-kinase, regulatory subunit 3 (P55, gamma).	chr1 46281920
AK128500	AK128500	Hypothetical protein FLJ46650.	chr1 46294128
NM_005727	NM_005727	Tetraspanin-1 (Tspan-1) (Tetraspan NET-1) (Tetraspanin TM4-C).	chr1 46418798
NM_017739	CR749700	Hypothetical protein DKFZp761B182.	chr1 46426940
NM_017739	AK056186	Novel protein.	chr1 46426941
NM_017739	NM_017739	Protein O-linked-mannose beta-1,2-N-acetylglucosaminyltransferase 1 (EC 2.4.1.-) (POMGnT1) (UDP-GlcNAc:alpha-D-mannoside beta-1,2-N- acetylglucosaminyltransferase I.2) (GnT I.2).	chr1 46426941
BC034422	BC034422	Hypothetical protein FLJ25163 (Hypothetical protein C1orf190) (Novel protein).	chr1 46441599
NM_003579	NM_003579	DNA repair and recombination protein RAD54-like (EC 3.6.1.-) (RAD54 homolog) (hRAD54) (hHR54).	chr1 46486003
NM_006369	NM_006369	Protein MUF1.	chr1 46516659
NM_006369	AF370430	Protein MUF1.	chr1 46516662
NM_006369	AK125827	MUF1 protein variant (Fragment).	chr1 46516662
BC101522	BC101522	n/a	chr1 46517066
NM_006004	BC093060	Ubiquinol-cytochrome c reductase complex 11 kDa protein, mitochondrial precursor (EC 1.10.2.2) (Mitochondrial hinge protein) (Cytochrome C1, nonheme 11 kDa protein) (Complex III subunit VIII).	chr1 46541956
NM_006004	NM_006004	Ubiquinol-cytochrome c reductase complex 11 kDa protein, mitochondrial precursor (EC 1.10.2.2) (Mitochondrial hinge protein) (Cytochrome C1, nonheme 11 kDa protein) (Complex III subunit VIII).	chr1 46541966
NM_199044	NM_199044	Novel protein.	chr1 46578976
NM_199044	AK021577	NSUN4 protein (Fragment).	chr1 46578983
AK128066	AK128066	Hypothetical protein FLJ46186.	chr1 46580094
NM_001441	NM_001441	Fatty-acid amide hydrolase (EC 3.1.-.-) (Oleamide hydrolase) (Anandamide amidohydrolase).	chr1 46632578
NM_147192	NM_147192	Homeoprotein MBX-L (Diencephalon/mesencephalon homeobox 1).	chr1 46745254
NM_147192	NM_172225	Homeoprotein MBX-S (Diencephalon/mesencephalon homeobox 1).	chr1 46745254
NM_182516	NM_182516	Hypothetical protein FLJ32011.	chr1 46783902
NM_003684	AB000409	MAP kinase interacting serine/threonine kinase 1.	chr1 46795677
NM_003684	AK096423	MAP kinase interacting serine/threonine kinase 1.	chr1 46795677
NM_003684	BX538193	Hypothetical protein DKFZp686E14208 (MAP kinase interacting serine/threonine kinase 1).	chr1 46795677
NM_003684	NM_003684	MAP kinase-interacting serine/threonine-protein kinase 1 (EC 2.7.1.37) (MAP kinase signal-integrating kinase 1) (Mnk1).	chr1 46795677
NM_198973	NM_198973	MNK1-like kinase 1b.	chr1 46796839
NM_145279	NM_145279	Mps one binder kinase activator-like 2C (Mob1 homolog 3C) (Protein Mob3C).	chr1 46845978
NM_145279	NM_201403	Mps one binder kinase activator-like 2C (Mob1 homolog 3C) (Protein Mob3C).	chr1 46845978
NM_145279	AK090453	MOB1, Mps One Binder kinase activator-like 2C (Yeast).	chr1 46845983
AL137294	AL137294	SLTP002.	chr1 46870999
NM_022745	NM_022745	Hypothetical protein FLJ22351 (ATP synthase mitochondrial F1 complex assembly factor 1).	chr1 46873299
NM_014774	NM_014774	Protein KIAA0494.	chr1 46913419
NM_000779	BC017758	Cytochrome P450 4B1 (EC 1.14.14.1) (CYPIVB1) (P450-HP).	chr1 47037304
NM_000779	NM_000779	Cytochrome P450 4B1 (EC 1.14.14.1) (CYPIVB1) (P450-HP).	chr1 47037328
NM_000779	AY064484	Truncated cytochrome P450.	chr1 47037340
NM_000779	AY151049	Pulmonary cytochrome P450 4B1 variant (Cytochrome P450, family 4, subfamily B, polypeptide 1).	chr1 47037340
AY262057	AY262057	Hypothetical protein FLJ40054.	chr1 47081353
AY696295	AY696295	Cytochrome P450.	chr1 47106250
NM_000778	NM_000778	Cytochrome P450 4A11 precursor (EC 1.14.15.3) (CYPIVA11) (Fatty acid omega-hydroxylase) (P-450 HK omega) (Lauric acid omega-hydroxylase) (CYP4AII) (P450-HL-omega).	chr1 47167434
BC022851	BC022851	CYP4A11 protein.	chr1 47169767
BC041158	BC041158	CYP4A11 protein (Cytochrome P450, family 4, subfamily A, polypeptide 11).	chr1 47170692
AK131355	AK131355	Hypothetical protein FLJ16384.	chr1 47199622
NM_178033	BC028102	Hypothetical protein FLJ34487.	chr1 47261826
NM_178033	NM_178033	Cytochrome P450 4X1 (EC 1.14.14.1) (CYPIVX1).	chr1 47261826
NM_178134	NM_178134	Cytochrome P450 4Z1 (EC 1.14.14.1) (CYPIVZ1).	chr1 47305746
NM_001010969	NM_001010969	Cytochrome P450, family 4, subfamily A, polypeptide 22.	chr1 47375693
NM_005764	NM_005764	PDZK1-interacting protein 1 (17 kDa membrane-associated protein) (DD96 protein).	chr1 47421847
NM_003189	M29038	Tal-1 product (Fragment).	chr1 47454550
NM_003189	M61108	n/a	chr1 47454550
NM_003189	M61108	n/a	chr1 47454550
NM_003189	NM_003189	T-cell acute lymphocytic leukemia-1 protein (TAL-1 protein) (Stem cell protein) (T-cell leukemia/lymphoma-5 protein).	chr1 47454550
NM_003035	CR749851	TAL1 (SCL) interrupting locus (Fragment).	chr1 47488403
NM_003035	NM_003035	SIL protein.	chr1 47488435
NM_016308	NM_016308	UMP-CMP kinase (EC 2.7.4.14) (Cytidylate kinase) (Deoxycytidylate kinase) (Cytidine monophosphate kinase) (Uridine monophosphate/cytidine monophosphate kinase) (UMP/CMP kinase) (UMP/CMPK) (Uridine monophosphate kinase).	chr1 47572174
NM_016308	BC014961	UMP-CMP kinase (EC 2.7.4.14) (Cytidylate kinase) (Deoxycytidylate kinase) (Cytidine monophosphate kinase) (Uridine monophosphate/cytidine monophosphate kinase) (UMP/CMP kinase) (UMP/CMPK) (Uridine monophosphate kinase).	chr1 47572202
NM_012186	NM_012186	Forkhead box protein E3 (Forkhead-related protein FKHL12) (Forkhead- related transcription factor 8) (FREAC-8).	chr1 47654330
NM_004474	NM_004474	Forkhead box protein D2 (Forkhead-related protein FKHL17) (Forkhead- related transcription factor 9) (FREAC-9).	chr1 47674275
AF111848	AF111848	PRO0529.	chr1 48340326
NM_001011547	NM_001011547	Solute carrier family 5 (Sodium/glucose cotransporter), member 9.	chr1 48460990
AF251047	AF251047	Connexin.	chr1 48500489
BC020660	BC020660	SPATA6 protein.	chr1 48536109
NM_019073	NM_019073	Spermatogenesis associated 6.	chr1 48536864
NM_032785	NM_032785	Hypothetical protein FLJ14442.	chr1 48822128
NM_024603	NM_024603	Hypothetical protein FLJ11588.	chr1 48966128
NM_024603	BC007932	C1orf165 protein.	chr1 48966130
BC035739	BC035739	Novel protein.	chr1 49055765
AF119862	AF119862	PRO2130.	chr1 50232576
AY033995	AY033995	HUD3 (ELAV (Embryonic lethal, abnormal vision, Drosophila)-like 4) (Hu antigen D).	chr1 50342168
AY033996	AY033996	ELAV (Embryonic lethal, abnormal vision, Drosophila)-like 4 (Hu antigen D).	chr1 50344550
AY033996	AY033996	ELAV (Embryonic lethal, abnormal vision, Drosophila)-like 4 (Hu antigen D).	chr1 50344550
NM_021952	AY033997	ELAV (Embryonic lethal, abnormal vision, Drosophila)-like 4 (Hu antigen D).	chr1 50347191
NM_021952	BC036071	ELAVL4 protein.	chr1 50347220
NM_021952	AY033998	ELAV (Embryonic lethal, abnormal vision, Drosophila)-like 4 (Hu antigen D).	chr1 50347224
NM_021952	NM_021952	ELAV-like protein 4 (Paraneoplastic encephalomyelitis antigen HuD) (Hu-antigen D).	chr1 50347224
AJ301580	AJ301580	DMRT-like family A2.	chr1 50656694
NM_007051	BC004970	Fas (TNFRSF6) associated factor 1.	chr1 50679522
NM_007051	NM_007051	FAS-associated factor 1 (FAF1 protein) (hFAF1).	chr1 50679522
NM_007051	NM_131917	Fas (TNFRSF6) associated factor 1.	chr1 50679522
NM_007051	AJ271408	Fas (TNFRSF6) associated factor 1.	chr1 50679535
NM_007051	AJ271408	FAS-associated factor 1 (FAF1 protein) (hFAF1).	chr1 50679535
NM_007051	AK094843	Fas (TNFRSF6) associated factor 1.	chr1 50679535
AF242772	AF242772	Mesenchymal stem cell protein DSCD28.	chr1 51192820
NM_001262	NM_001262	Cyclin-dependent kinase 6 inhibitor (p18-INK6) (Cyclin-dependent kinase 4 inhibitor C) (p18-INK4c).	chr1 51206954
AK130995	AK130995	Novel protein (Fragment).	chr1 51340487
NM_014372	NM_014372	RING finger protein 11 (Sid 1669).	chr1 51474558
BC028374	AF007170	Chromosome 1 open reading frame 34.	chr1 51525518
BC028374	BC004399	C1orf34 protein.	chr1 51525518
BC028374	BC028374	Chromosome 1 open reading frame 34.	chr1 51525543
BC028374	BC028374	Chromosome 1 open reading frame 34.	chr1 51525543
AK000220	AK000220	Chromosome 1 open reading frame 34.	chr1 51533799
AB007921	AB007921	Chromosome 1 open reading frame 34.	chr1 51535490
NM_001981	NM_001981	Epidermal growth factor receptor substrate 15 (Protein Eps15) (AF-1p protein).	chr1 51592523
BC054006	BC054006	EPS15 protein.	chr1 51593509
AK128043	AK128043	Oxysterol-binding protein.	chr1 51815438
NM_024586	NM_024586	Oxysterol binding protein-related protein 9 (OSBP-related protein 9) (ORP-9).	chr1 51855351
NM_024586	NM_148906	Oxysterol-binding protein.	chr1 51855351
NM_024586	NM_148908	Oxysterol-binding protein-like protein 9, isoform a.	chr1 51855351
NM_024586	NM_148909	Oxysterol-binding protein (Fragment).	chr1 51855351
NM_024586	AY178997	Oxysterol-binding protein.	chr1 51855368
NM_148904	NM_148904	Oxysterol-binding protein.	chr1 51968080
NM_148904	NM_148907	Oxysterol-binding protein.	chr1 51968110
NM_002525	AY360265	Nardilysin isoform.	chr1 52027470
NM_002525	BC008775	Nardilysin precursor (EC 3.4.24.61) (N-arginine dibasic convertase) (NRD convertase) (NRD-C).	chr1 52027470
NM_002525	NM_002525	Nardilysin precursor (EC 3.4.24.61) (N-arginine dibasic convertase) (NRD convertase) (NRD-C).	chr1 52027470
NM_002525	X93207	Nardilysin isoform.	chr1 52027470
NM_002525	X93207	Nardilysin precursor (EC 3.4.24.61) (N-arginine dibasic convertase) (NRD convertase) (NRD-C).	chr1 52027470
AY049784	AY049784	Nardilysin.	chr1 52029884
NM_002867	NM_002867	Ras-related protein Rab-3B.	chr1 52157424
NM_015913	NM_015913	Thioredoxin domain-containing protein 12 precursor (Thioredoxin-like protein p19) (Endoplasmic reticulum protein ERp19) (hTLP19).	chr1 52258394
NM_138417	NM_138417	KTI12 homolog, chromatin associated (Novel protein) (Hypothetical protein).	chr1 52270364
NM_152265	NM_152265	Transcription factor BTF3 homolog 4 (Basic transcription factor 3-like 4).	chr1 52294560
NM_004799	NM_004799	Zinc finger FYVE domain-containing protein 9 (Mothers against decapentaplegic homolog interacting protein) (Madh-interacting protein) (Smad anchor for receptor activation) (Receptor activation anchor) (hSARA) (Novel serine protease) (NSP).	chr1 52380633
NM_004799	NM_007324	Zinc finger, FYVE domain containing 9.	chr1 52380633
AF104304	AF104304	Zinc finger FYVE domain-containing protein 9 (Mothers against decapentaplegic homolog interacting protein) (Madh-interacting protein) (Smad anchor for receptor activation) (Receptor activation anchor) (hSARA) (Novel serine protease) (NSP).	chr1 52454639
NM_032449	NM_032449	Novel protein.	chr1 52588854
AK130874	BC039308	CC2D1B protein.	chr1 52590791
AK130874	AK130874	Hypothetical protein FLJ27364.	chr1 52590796
AK130874	BC016880	Novel protein (Fragment).	chr1 52590797
BC057844	BC057844	Hypothetical protein.	chr1 52606779
NM_004153	NM_004153	Origin recognition complex subunit 1 (Replication control protein 1).	chr1 52611089
NM_032864	NM_032864	Hypothetical protein FLJ34719 (Novel protein).	chr1 52642823
NM_032284	NM_032284	PRP38 pre-mRNA processing factor 38 (Yeast) domain containing A.	chr1 52642887
BC105004	BC105004	Hypothetical protein FLJ14936.	chr1 52642965
NM_001009881	NM_001009881	Zinc finger CCHC domain containing protein 11.	chr1 52661537
NM_001009881	NM_001009882	Zinc finger CCHC domain containing protein 11.	chr1 52661537
NM_001009881	NM_015269	Zinc finger CCHC domain containing protein 11.	chr1 52661537
BX648783	BX648783	Zinc finger, CCHC domain containing 11.	chr1 52700463
NM_015696	NM_015696	Glutathione peroxidase 7 precursor (EC 1.11.1.9) (CL683).	chr1 52840631
NM_182621	AK128236	Hypothetical protein FLJ46370.	chr1 52871603
NM_182621	NM_182621	Hypothetical protein MGC52498.	chr1 52871653
AY358621	AY358621	WWLS2783.	chr1 52871829
NM_023077	NM_023077	Hypothetical protein FLJ12439.	chr1 52925101
NM_024646	NM_024646	ZYG11B protein.	chr1 52964768
BC029832	BC029832	ZYG11B protein.	chr1 53009874
AK023518	AK023518	Hypothetical protein FLJ13456.	chr1 53034996
NM_001004339	NM_001004339	ZYG-11A early embryogenesis protein.	chr1 53080770
NM_018281	BX647186	Hypothetical protein FLJ45240.	chr1 53134484
NM_018281	BC044574	PP6 (ECHDC2 protein).	chr1 53134492
NM_018281	BC044574	ECHDC2 protein.	chr1 53134492
NM_018281	NM_018281	Hypothetical protein FLJ10948.	chr1 53134492
NM_001007098	NM_001007098	Sterol carrier protein X, isoform 2.	chr1 53165535
NM_001007098	NM_002979	Nonspecific lipid-transfer protein, mitochondrial precursor (NSL-TP) (Sterol carrier protein 2) (SCP-2) (Sterol carrier protein X) (SCP-X) (SCPX).	chr1 53165535
NM_001007098	AB208789	Sterol carrier protein X, isoform 2.	chr1 53165536
NM_153703	AY358294	Podocan.	chr1 53300441
NM_153703	BC030608	Podocan protein.	chr1 53300472
NM_153703	BC030608	PODN protein.	chr1 53300472
NM_153703	NM_153703	Podocan.	chr1 53300472
NM_006671	NM_006671	Excitatory amino acid transporter 5 (Retinal glutamate transporter).	chr1 53325443
BC000651	BC000651	SLC1A7 protein (Solute carrier family 1 (Glutamate transporter), member 7).	chr1 53346195
NM_000098	NM_000098	Carnitine O-palmitoyltransferase II, mitochondrial precursor (EC 2.3.1.21) (CPT II).	chr1 53434688
BC005172	BC005172	Carnitine O-palmitoyltransferase II, mitochondrial precursor (EC 2.3.1.21) (CPT II).	chr1 53435079
NM_017887	NM_017887	Novel protein.	chr1 53452361
NM_002370	NM_002370	Mago nashi protein homolog.	chr1 53465153
NM_033300	NM_033300	n/a	chr1 53483799
NM_033300	D50678	Low-density lipoprotein receptor-related protein 8 precursor (Apolipoprotein E receptor 2).	chr1 53483804
NM_033300	NM_001018054	Low density lipoprotein receptor-related protein 8, apolipoprotein e receptor.	chr1 53483804
NM_033300	NM_004631	Low-density lipoprotein receptor-related protein 8 precursor (Apolipoprotein E receptor 2).	chr1 53483804
NM_033300	NM_017522	Low density lipoprotein receptor-related protein 8, apolipoprotein e receptor.	chr1 53483804
NM_033067	NM_033067	Hypothetical protein FLJ32711 (DMRT-like family B with proline-rich C- terminal, 1).	chr1 53697659
NM_147193	NM_147193	Zinc finger protein GLIS1 (GLI-similar 1).	chr1 53744493
AK091439	AL354612	Hypothetical protein.	chr1 54003723
AK091439	AL354613	Hypothetical protein FLJ34120.	chr1 54003723
AK091439	AK091439	Hypothetical protein FLJ34120.	chr1 54003735
NM_018087	BC003082	Hypothetical protein FLJ12556.	chr1 54005977
NM_018087	BC003082	Hypothetical protein FLJ34120.	chr1 54005977
NM_018087	NM_018087	Hypothetical protein FLJ34120.	chr1 54005977
NM_018982	BC064590	Hypothetical protein FLJ20816 (YIPF1 protein).	chr1 54089994
NM_018982	NM_018982	Hypothetical protein FLJ20816 (YIPF1 protein).	chr1 54089994
NM_000792	NM_000792	n/a	chr1 54132448
BC005245	BC005245	Placental protein 25 (PP25).	chr1 54159821
NM_052940	NM_052940	Hypothetical protein LRRC42 (Hypothetical protein FLJ90720).	chr1 54184624
NM_052940	CR604576	Hypothetical protein LRRC42 (Hypothetical protein FLJ90720).	chr1 54184628
BC103740	BC103740	Novel protein.	chr1 54245564
NM_001010978	NM_001010978	Novel protein.	chr1 54247093
NM_004872	BC016374	Transmembrane protein 59 precursor (Liver membrane-bound protein).	chr1 54269938
NM_004872	NM_004872	Transmembrane protein 59 precursor (Liver membrane-bound protein).	chr1 54269938
BC095464	BC003106	Transmembrane protein 59 precursor (Liver membrane-bound protein).	chr1 54270269
BC095464	BC095464	Chromosome 1 open reading frame 8.	chr1 54270277
NM_153035	AK096488	Hypothetical protein FLJ39169.	chr1 54291847
NM_153035	NM_153035	Hypothetical protein FLJ32112 (Hypothetical protein C1orf83) (Novel protein).	chr1 54291861
AF217973	AF217973	Hypothetical protein.	chr1 54342555
NM_201546	NM_201546	Novel protein.	chr1 54377255
AK122760	AK122760	Hypothetical protein FLJ16295.	chr1 54381652
AK024684	AK024684	Hypothetical protein FLJ21031.	chr1 54407920
NM_001031672	NM_001031672	Hypothetical protein LOC606495.	chr1 54424414
NM_016491	NM_016491	Mitochondrial ribosomal protein L37.	chr1 54438427
AY421759	AY421759	Mitochondrial ribosomal protein L37 variant 2.	chr1 54438479
NM_001009955	NM_001009955	Single stranded DNA binding protein 3.	chr1 54464783
NM_001009955	NM_018070	Single stranded DNA binding protein 3.	chr1 54464783
NM_001009955	NM_145716	Single-stranded DNA-binding protein 3 (Sequence-specific single- stranded-DNA-binding protein).	chr1 54464783
BC066365	BC066365	Single stranded DNA binding protein 3.	chr1 54464938
BC066365	BC066365	Hypothetical protein FLJ10355.	chr1 54464938
NM_001034847	NM_001034847	MSTP128 (Novel protein).	chr1 54476297
NM_015547	NM_015547	Acyl-CoA thioester hydrolase 11 (EC 3.1.2.-) (Acyl-CoA thioesterase 11) (Brown fat inducible thioesterase) (BFIT) (Adipose-associated thioesterase).	chr1 54786488
NM_015547	NM_147161	Thioesterase, adipose associated, isoform BFIT2.	chr1 54786488
NM_176782	BC015993	Novel protein.	chr1 54847441
NM_176782	NM_176782	C1orf179 protein (Fragment).	chr1 54847441
NM_198547	BC028620	Hypothetical protein FLJ26537.	chr1 54880046
NM_198547	NM_198547	Novel protein (Fragment).	chr1 54880046
NM_198547	AK093272	Novel protein (Fragment).	chr1 54880061
AK128221	AK128221	Hypothetical protein FLJ46354.	chr1 54935452
NM_004623	NM_004623	Tetratricopeptide repeat protein 4 (TPR repeat protein 4).	chr1 54954143
AK123924	AK123924	Hypothetical protein FLJ41930.	chr1 54974949
NM_152268	NM_152268	Probable prolyl-tRNA synthetase, mitochondrial precursor (EC 6.1.1.15) (Proline--tRNA ligase) (ProRS).	chr1 54995160
NM_017904	NM_017904	Hypothetical protein FLJ20619.	chr1 55022812
NM_152607	NM_152607	Hypothetical protein FLJ40201 (Hypothetical protein C1orf177).	chr1 55044323
NM_152607	BC039109	C1orf177 protein.	chr1 55044362
NM_014762	NM_014762	24-dehydrocholesterol reductase precursor (EC 1.3.1.-) (3-beta- hydroxysterol delta-24-reductase) (Seladin-1) (Diminuto/dwarf1 homolog).	chr1 55087887
NM_014762	BC011669	Hypothetical protein Nbla03646.	chr1 55087895
NM_182532	NM_182532	Hypothetical protein TMEM61 (Novel protein).	chr1 55219052
NM_057176	NM_057176	Barttin.	chr1 55237204
NM_174936	NM_174936	Proprotein convertase subtilisin/kexin type 9 precursor (EC 3.4.21.-) (Proprotein convertase PC9) (Subtilisin/kexin-like protease PC9) (Neural apoptosis-regulated convertase 1) (NARC-1).	chr1 55277807
NM_207465	NM_207465	Hypothetical protein FLJ45337.	chr1 55819297
NM_003713	NM_003713	Lipid phosphate phosphohydrolase 3 (EC 3.1.3.4) (Phosphatidic acid phosphatase 2b) (Phosphatidate phosphohydrolase type 2b) (PAP2b) (PAP- 2b) (PAP2-beta) (Vascular endothelial growth factor and type I collagen inducible protein) (VCIP).	chr1 56733022
NM_006252	NM_006252	5'-AMP-activated protein kinase, catalytic alpha-2 chain (EC 2.7.1.-) (AMPK alpha-2 chain).	chr1 56883607
NM_001004303	NM_001004303	Hypothetical protein DKFZp686O04253.	chr1 56957065
AK125198	AK125198	Hypothetical protein FLJ43208.	chr1 56964799
NM_000562	NM_000562	Complement component C8 alpha chain precursor (Complement component 8 alpha subunit).	chr1 57093066
NM_000066	NM_000066	Complement component C8 beta chain precursor (Complement component 8 beta subunit).	chr1 57167472
NM_021080	AF263547	Disabled homolog 1 (Drosophila).	chr1 57236166
NM_021080	NM_021080	Disabled homolog 1.	chr1 57236166
BC067445	BC067445	Disabled homolog 1 (Drosophila) (Fragment).	chr1 57236285
BC067445	BC067447	DAB1 protein.	chr1 57236285
AK091101	AK091101	OMA1 homolog, zinc metallopeptidase (S. cerevisiae) (Fragment).	chr1 58706186
NM_145243	NM_145243	OMA1 homolog, zinc metallopeptidase (S. cerevisiae) (Fragment).	chr1 58718979
NM_002353	NM_002353	Tumor-associated calcium signal transducer 2 precursor (Pancreatic carcinoma marker protein GA733-1) (Cell surface glycoprotein Trop-2).	chr1 58813230
AB067502	AB067502	Hypothetical protein DKFZp313C082.	chr1 58892999
NM_002228	NM_002228	Transcription factor AP-1 (Activator protein 1) (AP1) (Proto-oncogene c-jun) (V-jun avian sarcoma virus 17 oncogene homolog) (p39).	chr1 59019052
AK090568	BX647626	Novel protein.	chr1 59535240
AK090568	BX647626	Hypothetical protein FLJ10986.	chr1 59535240
AK090568	BX647626	Hypothetical protein FLJ10986 (Novel protein).	chr1 59535240
AK090568	AK022237	Hypothetical protein FLJ12175.	chr1 59535243
AK090568	AK090568	Novel protein.	chr1 59535271
NM_018291	BC014947	Novel protein.	chr1 59535327
NM_018291	BC014947	Hypothetical protein FLJ10986 (Novel protein).	chr1 59535327
NM_018291	NM_018291	Novel protein.	chr1 59535327
NM_018291	CR623798	Novel protein.	chr1 59535363
NM_018291	CR623798	Hypothetical protein FLJ10986.	chr1 59535363
AK054842	AK054842	Novel protein.	chr1 59548346
NM_015888	NM_015888	Hook homolog 1 (h-hook1) (hHK1).	chr1 60053120
NM_000775	NM_000775	Cytochrome P450 2J2 (EC 1.14.14.1) (CYPIIJ2) (Arachidonic acid epoxygenase).	chr1 60131568
AK126061	AK126061	Hypothetical protein FLJ44073.	chr1 60225528
NM_152377	BC027878	C1orf87 protein.	chr1 60228654
NM_152377	NM_152377	C1orf87 protein.	chr1 60228654
AB037860	AB037860	Nuclear factor 1 A-type (Nuclear factor 1/A) (NF1-A) (NFI-A) (NF-I/A) (CCAAT-box binding transcription factor) (CTF) (TGGCA-binding protein).	chr1 61320567
NM_005595	NM_005595	Nuclear factor 1 A-type (Nuclear factor 1/A) (NF1-A) (NFI-A) (NF-I/A) (CCAAT-box binding transcription factor) (CTF) (TGGCA-binding protein).	chr1 61320882
BC034822	BC034822	MGC34796 protein.	chr1 61892505
NM_032027	NM_032027	Beta-amyloid binding protein precursor.	chr1 61919306
NM_176878	NM_176878	n/a	chr1 61980736
NM_019079	NM_019079	Hypothetical protein DKFZp434B1629 (ES cell associated transcript 11).	chr1 62433123
NM_181712	BC060866	Hypothetical protein FLJ38940.	chr1 62475408
NM_181712	BC060866	Novel protein.	chr1 62475408
NM_181712	NM_181712	Ankyrin repeat domain 38.	chr1 62475408
AK091941	AK091941	Hypothetical protein FLJ38940.	chr1 62475803
NM_003368	NM_003368	Ubiquitin carboxyl-terminal hydrolase 1 (EC 3.1.2.15) (Ubiquitin thiolesterase 1) (Ubiquitin-specific processing protease 1) (Deubiquitinating enzyme 1) (hUBP).	chr1 62674970
NM_033407	NM_033407	Dedicator of cytokinesis protein 7.	chr1 62692986
AK125049	AK125049	Dedicator of cytokinesis protein 7.	chr1 62693271
AK055401	AK055401	Hypothetical protein FLJ30839 (Dedicator of cytokinesis 7).	chr1 62822364
NM_014495	NM_014495	Angiopoietin-related protein 3 precursor (Angiopoietin-like 3) (Angiopoietin-5) (ANG-5).	chr1 62835774
AK130016	AK130016	Hypothetical protein FLJ26506.	chr1 62846024
NM_032852	NM_032852	Cysteine protease ATG4C (EC 3.4.22.-) (Autophagy-related protein 4 homolog C) (Autophagin-3) (Autophagy-related cysteine endopeptidase 3) (AUT-like 3 cysteine endopeptidase).	chr1 63022390
NM_032852	BC008395	Cysteine protease ATG4C (EC 3.4.22.-) (Autophagy-related protein 4 homolog C) (Autophagin-3) (Autophagy-related cysteine endopeptidase 3) (AUT-like 3 cysteine endopeptidase).	chr1 63022419
NM_012183	NM_012183	Forkhead box protein D3 (HNF3/FH transcription factor genesis).	chr1 63561317
NM_013339	NM_013339	Dolichyl pyrophosphate Man9GlcNAc2 alpha-1,3-glucosyltransferase (EC 2.4.1.-) (Dolichyl-P-Glc:Man9GlcNAc2-PP-dolichyl glucosyltransferase).	chr1 63605885
NM_014288	BC014385	Integrin beta 3 binding protein (Beta3-endonexin).	chr1 63679032
NM_014288	BC014385	Integrin beta 3 binding protein (Beta3-endonexin).	chr1 63679032
NM_014288	NM_014288	Nuclear receptor-interacting factor 3 (Integrin beta-3 binding protein) (Beta3-endonexin).	chr1 63679049
NM_014288	U37139	Nuclear receptor-interacting factor 3 (Integrin beta-3 binding protein) (Beta3-endonexin).	chr1 63679049
NM_032437	NM_032437	Hypothetical protein DKFZp666D225 (Fragment).	chr1 63761855
NM_002633	NM_002633	Phosphoglucomutase-1 (EC 5.4.2.2) (Glucose phosphomutase 1) (PGM 1).	chr1 63831534
NM_005012	BC080541	ROR1 protein (Receptor tyrosine kinase-like orphan receptor 1).	chr1 64012277
NM_005012	M97675	n/a	chr1 64012301
NM_005012	NM_005012	Tyrosine-protein kinase transmembrane receptor ROR1 precursor (EC 2.7.1.112) (Neurotrophic tyrosine kinase, receptor-related 1).	chr1 64012301
NM_020925	NM_020925	Hypothetical protein DKFZp686L04115.	chr1 64744185
BC039301	BC039301	Hypothetical protein FLJ14194.	chr1 64801947
BC039301	BC039301	Hypothetical protein FLJ12509.	chr1 64801947
NM_018211	NM_018211	Probable RNA-binding protein KIAA1579.	chr1 64983365
AK001632	AK001632	Hypothetical protein FLJ10770.	chr1 65016336
AB209057	AB209057	Tyrosine-protein kinase JAK1 (EC 2.7.1.112) (Janus kinase 1) (JAK-1).	chr1 65072345
NM_002227	NM_002227	Tyrosine-protein kinase JAK1 (EC 2.7.1.112) (Janus kinase 1) (JAK-1).	chr1 65072797
AK128375	AK128375	Hypothetical protein FLJ46518.	chr1 65094103
NM_001005353	NM_001005353	Adenylate kinase isoenzyme 4, mitochondrial (EC 2.7.4.3) (ATP-AMP transphosphorylase).	chr1 65386100
AK123450	AK123450	CDNA FLJ41456 fis, clone BRSTN2012320.	chr1 65492732
NM_014787	NM_014787	KIAA0473 protein (Fragment).	chr1 65503017
AB088847	AB088847	Brain peptide A1.	chr1 65537042
BC109280	BC109280	DnaJ (Hsp40) homolog, subfamily C, member 6.	chr1 65547869
BC109280	BC109280	DNAJC6 protein.	chr1 65547869
NM_001003679	NM_001003679	LEPR protein (Fragment).	chr1 65658905
NM_001003679	NM_001003680	LEPR protein (Fragment).	chr1 65658905
NM_001003679	NM_002303	Leptin receptor precursor (LEP-R) (OB receptor) (OB-R) (HuB219) (CD295 antigen).	chr1 65658905
NM_001003679	NM_017526	Leptin receptor gene-related protein (OB-R gene related protein) (OB- RGRP) (Leptin receptor overlapping transcript protein).	chr1 65658906
NM_001037341	NM_001037341	cAMP-specific 3',5'-cyclic phosphodiesterase 4B (EC 3.1.4.17) (DPDE4) (PDE32).	chr1 66030780
NM_001037340	NM_001037340	Phosphodiesterase 4B, cAMP-specific (Phosphodiesterase E4 dunce homolog, Drosophila) variant (Fragment).	chr1 66230977
NM_001037339	NM_001037339	3',5'-cyclic AMP phosphodiesterase (Fragment).	chr1 66570380
AK127365	AK127365	Hypothetical protein FLJ45439.	chr1 66609458
BC040516	BC040516	SGIP1 protein.	chr1 66771653
CR749541	BX640813	Hypothetical protein DKFZp686C21224.	chr1 66771862
CR749541	CR749541	Hypothetical protein DKFZp686A16142.	chr1 66771864
NM_032291	NM_032291	Hypothetical protein DKFZp761D221.	chr1 66772552
AK125044	AK125044	Hypothetical protein FLJ43054 (Novel protein).	chr1 66932964
NM_152665	NM_152665	Hypothetical protein FLJ40873.	chr1 66990729
NM_005478	NM_005478	Insulin-like peptide INSL5 precursor (Insulin-like peptide 5) [Contains: Insulin-like peptide INSL5 B chain; Insulin-like peptide INSL5 A chain].	chr1 67036012
NM_024763	NM_024763	Hypothetical protein FLJ23129.	chr1 67051160
NM_207014	BC032406	Novel protein.	chr1 67075875
NM_207014	NM_207014	Novel protein.	chr1 67075875
CR620846	CR620846	Novel protein.	chr1 67109518
NM_020948	AL831987	n/a	chr1 67163227
NM_020948	AF515447	Mesoderm induction early response 1 (MI-ER1).	chr1 67163229
NM_020948	AF515448	n/a	chr1 67163229
NM_020948	AY124186	Mesoderm induction early response 1 (MI-ER1).	chr1 67163229
NM_020948	AY124187	Mesoderm induction early response 1 (MI-ER1).	chr1 67163229
NM_020948	NM_020948	Mesoderm induction early response protein 1 (Mi-er1) (hmi-er1) (Early response 1) (Er1).	chr1 67163229
NM_020948	BC066898	MIER1 protein.	chr1 67163237
NM_020948	BC066898	Mesoderm induction early response 1 (MI-ER1).	chr1 67163237
CR627441	BC108726	Hypothetical protein.	chr1 67163284
CR627441	CR627441	Mesoderm induction early response 1 (MI-ER1).	chr1 67163289
AF515446	AF515446	n/a	chr1 67168513
NM_015139	NM_015139	UDP-glucuronic acid/UDP-N-acetylgalactosamine transporter (UDP- GlcA/UDP-GalNAc transporter) (Solute carrier family 35 member D1) (UDP-galactose transporter-related protein 7) (UGTrel7).	chr1 67242439
NM_001013674	NM_001013674	Novel protein.	chr1 67330446
BC047053	BC047053	Novel protein (C1orf141 protein).	chr1 67330667
BC062728	BC062728	Novel protein.	chr1 67331220
NM_144701	NM_144701	Interleukin 23 receptor.	chr1 67404756
BC040720	BC040720	IL23R protein.	chr1 67445908
NM_001559	NM_001559	Interleukin-12 receptor beta-2 chain precursor (IL-12 receptor beta-2) (IL-12R-beta2).	chr1 67545634
NM_001018067	NM_001018067	Plasminogen activator inhibitor 1 RNA-binding protein (PAI1 RNA- binding protein 1) (PAI-RBP1) (SERPINE1 mRNA-binding protein 1).	chr1 67646082
NM_001018067	NM_001018068	PAI-1 mRNA-binding protein variant (PAI-RBP1).	chr1 67646082
NM_001018067	NM_001018069	PAI-1 mRNA-binding protein (PAI-RBP1).	chr1 67646082
NM_001018067	NM_015640	PAI-1 mRNA-binding protein variant (PAI-RBP1).	chr1 67646082
NM_001924	NM_001924	Growth arrest and DNA-damage-inducible protein GADD45 alpha (DNA- damage inducible transcript 1) (DDIT1).	chr1 67923470
NM_001924	DQ008445	Growth arrest and DNA-damage-inducible, alpha (Growth arrest and DNA- damage-inducible 45 alpha).	chr1 67923484
NM_018841	NM_018841	Guanine nucleotide-binding protein G(I)/G(S)/G(O) gamma-12 subunit.	chr1 67939809
AK124028	AK124028	Hypothetical protein FLJ42034.	chr1 68070573
NM_004675	NM_004675	GTP-binding protein Di-Ras3 (Distinct subgroup of the Ras family member 3) (Rho-related GTP-binding protein RhoI).	chr1 68284234
NM_001002292	NM_001002292	Putative NFkB activating protein 373.	chr1 68336739
NM_024911	NM_024911	Hypothetical protein FLJ90102 (Putative NFkB activating protein 373).	chr1 68363629
AK074583	AK074583	Hypothetical protein FLJ90102 (Putative NFkB activating protein 373).	chr1 68363764
AK074583	BC110826	Hypothetical protein FLJ23091.	chr1 68363764
AK074583	BX648748	Putative NFkB activating protein 373.	chr1 68363764
AB097018	AB097018	Putative NFkB activating protein 373.	chr1 68432126
NM_000329	NM_000329	Retinal pigment epithelium-specific 65 kDa protein.	chr1 68667094
NM_017779	NM_017779	Putative cell cycle control protein (DEP domain containing 1).	chr1 68713526
AK000490	AK000490	Hypothetical protein FLJ20483.	chr1 68713846
AF498274	AF498274	OTTHUMP00000065338.	chr1 69806720
NM_020794	NM_020794	Leucine-rich repeat-containing protein 7 (LAP1 protein) (Densin-180).	chr1 69998445
U82382	U82382	PIN1-like protein.	chr1 70157592
NM_017768	BC008586	Hypothetical protein FLJ20331.	chr1 70383082
NM_017768	NM_017768	LRRC40 protein (Fragment).	chr1 70383084
NM_004768	NM_004768	Splicing factor arginine/serine-rich 11 (Arginine-rich 54 kDa nuclear protein) (p54).	chr1 70443952
NM_004768	BC040436	Splicing factor arginine/serine-rich 11 (Arginine-rich 54 kDa nuclear protein) (p54).	chr1 70443994
AL832279	AL832279	Splicing factor, arginine/serine-rich 11.	chr1 70469818
AL136717	AL136717	Hypothetical protein DKFZp566D1346.	chr1 70499507
NM_030816	NM_030816	Hypothetical protein ANKRD13C.	chr1 70500133
BC016937	BC016937	ANKRD13C protein.	chr1 70591081
NM_001031693	NM_001031693	HERV-H LTR-associating 3, isoform 1.	chr1 70593080
NM_001031693	NM_001036645	HERV-H LTR-associating 3.	chr1 70593080
NM_001031693	NM_007071	Alternative HHLA3 protein (HERV-H LTR-associating 3).	chr1 70593080
NM_001902	NM_001902	Cystathionine gamma-lyase (EC 4.4.1.1) (Gamma-cystathionase).	chr1 70649542
NM_001902	NM_153742	n/a	chr1 70649542
NM_000957	NM_000957	Prostaglandin E receptor 3 (Subtype EP3).	chr1 71090623
NM_000957	NM_198712	Prostaglandin E receptor 3 subtype EP3.	chr1 71090623
NM_000957	NM_198713	EP3-VI protein.	chr1 71090623
NM_000957	NM_198714	Prostaglandin E2 receptor, EP3 subtype (Prostanoid EP3 receptor) (PGE receptor, EP3 subtype) (PGE2-R).	chr1 71090623
NM_000957	NM_198716	n/a	chr1 71090623
NM_000957	NM_198717	n/a	chr1 71090623
D86097	D86097	Prostaglandin EP3 receptor subtype isoform (Prostaglandin E receptor 3) (Subtype EP3).	chr1 71090712
NM_198718	NM_198718	Prostaglandin E receptor 3 (Subtype EP3).	chr1 71190702
NM_198719	NM_198719	Prostaglandin E2 receptor, EP3 subtype (Prostanoid EP3 receptor) (PGE receptor, EP3 subtype) (PGE2-R).	chr1 71209051
NM_198715	NM_198715	EP3-III protein.	chr1 71249415
NM_005455	NM_005455	Zinc finger protein 265 (Zinc finger, splicing).	chr1 71301562
NM_005455	NM_203350	Zinc finger protein 265 (Zinc finger, splicing).	chr1 71301562
NM_173808	BC036771	Hypothetical protein DKFZp686P14120 (Fragment).	chr1 71641213
NM_173808	NM_173808	Neuronal growth regulator 1 precursor.	chr1 71641213
NM_173808	BX538014	Neuronal growth regulator 1 precursor.	chr1 71641214
BC062795	BC062795	Hypothetical protein.	chr1 74264514
NM_145258	NM_145258	Hypothetical protein LRRC44.	chr1 74418183
NM_003838	NM_003838	Fucose-1-phosphate guanylyltransferase (EC 2.7.7.30) (GDP-L-fucose pyrophosphorylase) (GDP-L-fucose diphosphorylase).	chr1 74436513
NM_015978	NM_015978	Serine/threonine-protein kinase TNNI3K (EC 2.7.1.37) (TNNI3- interacting kinase) (Cardiac ankyrin repeat kinase).	chr1 74473672
AK127029	AK127029	Hypothetical protein FLJ45085.	chr1 74653036
NM_001002912	NM_001002912	Hypothetical protein DKFZp781L0319.	chr1 74806383
NM_001002912	CR749349	Hypothetical protein DKFZp781L0319.	chr1 74806389
BC073916	BC073916	Hypothetical protein.	chr1 74827599
NM_001889	BX647883	Hypothetical protein DKFZp686C16101.	chr1 74943767
NM_001889	NM_001889	Quinone oxidoreductase (EC 1.6.5.5) (NADPH:quinone reductase) (Zeta- crystallin).	chr1 74943771
NM_138467	BC071765	Hypothetical protein DKFZp313J0833 (Fragment).	chr1 74971427
NM_138467	NM_138467	Hypothetical protein DKFZp313J0833 (Fragment).	chr1 74971427
BX647591	BX647591	Hypothetical protein DKFZp313J0833 (Fragment).	chr1 74990601
NM_001001933	NM_001001933	LIM homeobox 8 (Fragment).	chr1 75366706
BC034580	BC034580	SLC44A5 protein.	chr1 75441784
AK093170	AK093170	SLC44A5 protein.	chr1 75441885
NM_152697	NM_152697	Choline transporter-like protein 5 (Solute carrier family 44 member 5).	chr1 75444870
NM_000016	NM_000016	Acyl-CoA dehydrogenase, medium-chain specific, mitochondrial precursor (EC 1.3.99.3) (MCAD).	chr1 75962869
BX647734	BX647734	Acyl-CoA dehydrogenase, medium-chain specific, mitochondrial precursor (EC 1.3.99.3) (MCAD).	chr1 75962981
AF251043	AF251043	Acyl-CoA dehydrogenase, medium-chain specific, mitochondrial precursor (EC 1.3.99.3) (MCAD).	chr1 75963052
NM_004582	NM_004582	Geranylgeranyl transferase type II beta subunit (EC 2.5.1.60) (Rab geranylgeranyltransferase beta subunit) (Rab geranyl- geranyltransferase beta subunit) (Rab GG transferase beta) (Rab GGTase beta).	chr1 76024473
NM_002440	NM_002440	MutS protein homolog 4.	chr1 76035217
AK124418	AK124418	Hypothetical protein FLJ42427.	chr1 76036253
NM_080868	BC022517	ASB17 protein.	chr1 76157147
NM_080868	NM_080868	Ankyrin repeat and SOCS box protein 17 (ASB-17).	chr1 76157147
NM_152996	NM_152996	Alpha-N-acetylgalactosaminide alpha-2,6-sialyltransferase 3 (EC 2.4.99.-) (GalNAc alpha-2,6-sialyltransferase III) (ST6GalNAc III) (Sialyltransferase 7C) (STY).	chr1 76312991
NM_030965	NM_030965	Alpha-N-acetylgalactosaminide alpha-2,6-sialyltransferase 5 (EC 2.4.99.-) (GalNAc alpha-2,6-sialyltransferase V) (ST6GalNAc V) (GD1 alpha synthase) (Sialyltransferase 7E).	chr1 77105773
BX648473	BX648473	Phosphatidylinositol glycan, class K.	chr1 77327262
NM_005482	NM_005482	GPI-anchor transamidase precursor (EC 3.-.-.-) (GPI transamidase) (Phosphatidylinositol-glycan biosynthesis, class K protein) (PIG-K) (hGPI8).	chr1 77329976
NM_174858	NM_174858	Adenylate kinase isoenzyme 5 (EC 2.7.4.3) (ATP-AMP transphosphorylase).	chr1 77520329
NM_174858	AK090967	Hypothetical protein FLJ33648.	chr1 77520330
NM_012093	BC033896	Adenylate kinase isoenzyme 5 (EC 2.7.4.3) (ATP-AMP transphosphorylase).	chr1 77520874
NM_012093	NM_012093	Adenylate kinase isoenzyme 5 (EC 2.7.4.3) (ATP-AMP transphosphorylase).	chr1 77520874
NM_015534	NM_015534	Zinc finger, ZZ domain containing 3 (Hypothetical protein DKFZp686C16148).	chr1 77802778
NM_015534	BC035079	ZZZ3 protein.	chr1 77802780
NM_015017	NM_015017	Ubiquitin carboxyl-terminal hydrolase 33 (EC 3.1.2.15) (Ubiquitin thiolesterase 33) (Ubiquitin-specific processing protease 33) (Deubiquitinating enzyme 33) (VHL-interacting deubiquitinating enzyme 1).	chr1 77934263
NM_015017	NM_201624	Hypothetical protein DKFZp586N041 (Fragment).	chr1 77934263
NM_201626	NM_201626	n/a	chr1 77949927
NM_198549	NM_198549	Hypothetical protein FLJ35093 (Hypothetical protein DKFZp686M07166).	chr1 78017896
NM_199343	NM_199343	Hypothetical protein FLJ90637.	chr1 78119620
NM_144573	NM_144573	Hypothetical protein FLJ25225.	chr1 78156395
NM_144573	AF114264	Hypothetical protein.	chr1 78156400
BC017247	BC017247	Far upstream element-binding protein 1 (FUSE-binding protein 1) (FBP) (DNA helicase V) (HDH V).	chr1 78184755
NM_003902	NM_003902	Far upstream element-binding protein 1 (FUSE-binding protein 1) (FBP) (DNA helicase V) (HDH V).	chr1 78186180
NM_007034	NM_007034	DnaJ homolog subfamily B member 4 (Heat shock 40 kDa protein 1 homolog) (Heat shock protein 40 homolog) (HSP40 homolog).	chr1 78243223
NM_017655	BC036075	Hypothetical protein FLJ20075.	chr1 78284176
NM_017655	NM_017655	PDZ domain protein GIPC2.	chr1 78284176
NM_000959	NM_000959	Prostaglandin F2-alpha receptor (Prostanoid FP receptor) (PGF receptor) (PGF2 alpha receptor).	chr1 78729315
NM_000959	AY485530	Prostaglandin F2-alpha receptor (Prostanoid FP receptor) (PGF receptor) (PGF2 alpha receptor).	chr1 78729344
NM_006820	NM_006820	Homo sapiens mRNA expressed in osteoblast, complete cds.	chr1 78858736
AL832618	AL832618	Hypothetical protein DKFZp451O2417.	chr1 78863942
NM_006417	NM_006417	Interferon-induced protein 44 (p44).	chr1 78888103
BC025721	BC025721	Hypothetical protein FLJ23911.	chr1 79128876
BC025721	BC025721	EGF, latrophilin and seven transmembrane domain containing protein 1 precursor (EGF-TM7-latrophilin-related protein) (ETL protein).	chr1 79128876
BC025721	BC025721	EGF, latrophilin and seven transmembrane domain containing protein 1 precursor (EGF-TM7-latrophilin-related protein) (ETL protein).	chr1 79128876
NM_012302	AF104266	Latrophilin-2 precursor (Calcium-independent alpha-latrotoxin receptor 2) (Latrophilin homolog 1) (Lectomedin-1).	chr1 82038669
NM_012302	AF104938	Latrophilin 2.	chr1 82038669
NM_012302	NM_012302	Latrophilin-2 precursor (Calcium-independent alpha-latrotoxin receptor 2) (Latrophilin homolog 1) (Lectomedin-1).	chr1 82038669
AK128604	AK128604	Hypothetical protein FLJ46763.	chr1 84107873
AK126792	BC028350	Novel protein containing a tubulin-tyrosine ligase family domain.	chr1 84107969
AK126792	BC032829	TTLL7 protein.	chr1 84107969
AK126792	BC048970	Novel protein containing a tubulin-tyrosine ligase family domain.	chr1 84107969
AK126792	AK126792	Tubulin tyrosine ligase-like protein 7 (Protein NYD-SP30).	chr1 84107971
AK126792	AK026686	Novel protein containing a tubulin-tyrosine ligase family domain.	chr1 84107973
AK126792	AY170843	Novel protein containing a tubulin-tyrosine ligase family domain.	chr1 84107973
AK126792	AY170843	Tubulin tyrosine ligase-like protein 7 (Protein NYD-SP30).	chr1 84107973
NM_024686	NM_024686	Tubulin tyrosine ligase-like protein 7 (Protein NYD-SP30).	chr1 84108034
NM_002731	NM_002731	cAMP-dependent protein kinase, beta-catalytic subunit (EC 2.7.1.37) (PKA C-beta).	chr1 84316332
NM_002731	NM_207578	CAMP-dependent protein kinase catalytic subunit beta, isoform 3 (Protein kinase, cAMP-dependent, catalytic, beta).	chr1 84316332
NM_182948	NM_182948	CAMP-dependent protein kinase catalytic beta subunit isoform 2 (Fragment).	chr1 84382539
CR936631	CR936631	Hypothetical protein DKFZp781I2452.	chr1 84402652
AB209189	BX647515	Protein kinase, cAMP-dependent, catalytic, beta.	chr1 84402965
AB209189	AB209189	Protein kinase, cAMP-dependent, catalytic, beta.	chr1 84402974
AK091420	AK091420	Protein kinase, cAMP-dependent, catalytic, beta.	chr1 84403236
AY047582	AY047582	Neural cell expressed developmentally down-regulated protein 8.	chr1 84482661
NM_001010971	AK056937	Dnaj-like protein (LOC148418).	chr1 84536636
NM_001010971	NM_001010971	Dnaj-like protein (LOC148418).	chr1 84536636
AY604569	AY604569	HSD-42.	chr1 84582948
AY604569	AY604570	HSD-42.	chr1 84582948
NM_021233	AF274571	Deoxyribonuclease II beta precursor (EC 3.1.22.1) (DNase II beta) (DNase2-like acid DNase) (DNase II-like acid DNase) (Endonuclease DLAD).	chr1 84636802
NM_021233	NM_021233	Deoxyribonuclease II beta precursor (EC 3.1.22.1) (DNase II beta) (DNase2-like acid DNase) (DNase II-like acid DNase) (Endonuclease DLAD).	chr1 84636802
NM_058248	NM_058248	Deoxyribonuclease II beta.	chr1 84646621
NM_025065	NM_025065	Ribosome production factor 1 (Ribosome biogenesis protein RPF1) (Brix domain containing protein 5).	chr1 84717545
NM_005274	NM_005274	Guanine nucleotide-binding protein G(I)/G(S)/G(O) gamma-5 subunit.	chr1 84736679
NM_022354	BC064144	Hypothetical protein.	chr1 84744561
NM_022354	NM_022354	Sperm-specific protein SP-2.	chr1 84744600
BC024007	BC024007	CTBS protein.	chr1 84791394
NM_004388	NM_004388	Di-N-acetylchitobiase precursor (EC 3.2.1.-).	chr1 84792809
NM_004388	CR602282	Chitobiase, di-N-acetyl-.	chr1 84792822
NM_001033660	NM_001033660	Hypothetical protein FLJ35487.	chr1 84866500
NM_014021	NM_014021	Afadin- and alpha-actinin-binding protein (ADIP) (Afadin DIL domain- interacting protein) (SSX2-interacting protein).	chr1 84882186
BC064389	BC064389	Afadin- and alpha-actinin-binding protein (ADIP) (Afadin DIL domain- interacting protein) (SSX2-interacting protein).	chr1 84885611
NM_012152	NM_012152	Lysophosphatidic acid receptor Edg-7 (LPA receptor 3) (LPA-3).	chr1 85052088
NM_153259	NM_153259	Mucolipin-2.	chr1 85163854
BC104891	BC104891	Mucolipin-2.	chr1 85164899
NM_018298	NM_018298	Mucolipin-3.	chr1 85256353
BC060765	BC060765	MCOLN3 protein.	chr1 85262821
NM_145172	NM_145172	Testis development protein NYD-SP29.	chr1 85300594
NM_145172	AK054629	Hypothetical protein FLJ30067 (Testis development protein NYD-SP29) (NYD-SP29).	chr1 85300614
AK126929	AK126929	Gm117 form B (BCL10-associated protein variant 2) (Fragment).	chr1 85488226
NM_198077	NM_198077	Hypothetical protein C1orf52 (BCL10-associated protein variant 1) (Novel protein) (Gm117).	chr1 85490243
BC053617	BC053617	B cell lymphoma/leukemia 10 (B-cell CLL/lymphoma 10) (Bcl-10) (CED- 3/ICH-1 prodomain homologous E10-like regulator) (CIPER) (CARD- containing molecule enhancing NFkappaB) (Cellular homolog of vCARMEN) (cCARMEN) (Mammalian CARD-containing adapter molecule	chr1 85505433
NM_012137	BX648145	Hypothetical protein DKFZp686N2176.	chr1 85556756
NM_012137	NM_012137	NG,NG-dimethylarginine dimethylaminohydrolase 1 (EC 3.5.3.18) (Dimethylargininase 1) (Dimethylarginine dimethylaminohydrolase 1) (DDAHI) (DDAH-1).	chr1 85556756
NM_001554	NM_001554	CYR61 protein precursor (Cysteine-rich, angiogenic inducer, 61) (Insulin-like growth factor-binding protein 10) (GIG1 protein).	chr1 85819047
NM_017953	BC110898	Hypothetical protein FLJ20729.	chr1 85891077
NM_017953	NM_017953	Hypothetical protein DKFZp434M1929.	chr1 85891079
NM_152890	NM_152890	Alpha 1 type XXIV collagen precursor.	chr1 85967505
NM_001007022	AB033055	Novel protein.	chr1 86586999
NM_001007022	BC091490	ODF2L protein.	chr1 86587008
NM_001007022	NM_001007022	ODF2L protein.	chr1 86587008
NM_001007022	NM_020729	ODF2L protein.	chr1 86587008
BC047368	BC047368	Novel protein.	chr1 86588365
NM_006536	NM_006536	Calcium-activated chloride channel-2 (Calcium-activated chloride channel protein 3).	chr1 86662412
NM_001285	NM_001285	Calcium-dependent chloride channel-1.	chr1 86706638
NM_012128	NM_012128	Hypothetical protein FLJ20131.	chr1 86785348
NM_012128	AY358470	Hypothetical protein FLJ20131.	chr1 86785366
NM_004921	NM_004921	CLCA homolog.	chr1 86872546
NM_016009	NM_016009	SH3 domain GRB2-like protein B1 (EC 2.3.1.-) (Endophilin B1) (Bax- interacting factor 1) (Bif-1).	chr1 86943091
AF263293	AF257318	SH3 domain GRB2-like protein B1 (EC 2.3.1.-) (Endophilin B1) (Bax- interacting factor 1) (Bif-1).	chr1 86943145
AF263293	AF263293	SH3 domain GRB2-like protein B1 (EC 2.3.1.-) (Endophilin B1) (Bax- interacting factor 1) (Bif-1).	chr1 86943165
NM_004261	NM_004261	15 kDa selenoprotein precursor.	chr1 87100717
NM_012262	BC025384	Hypothetical protein.	chr1 87152922
NM_012262	NM_012262	Heparan sulfate 2-O-sulfotransferase 1 (EC 2.8.2.-) (2-O- sulfotransferase) (2OST).	chr1 87152949
NM_207357	BC041867	LOC339524 protein.	chr1 87370225
NM_207357	NM_207357	LOC339524 protein.	chr1 87370245
NM_006769	NM_006769	LIM domain transcription factor LMO4 (LIM domain only protein 4) (LMO- 4) (Breast tumor autoantigen).	chr1 87566738
NM_006256	NM_006256	Protein kinase N2 (EC 2.7.1.37) (Protein kinase C-like 2) (Protein- kinase C-related kinase 2).	chr1 88922843
BC062620	BC062620	PKN2 protein.	chr1 89071357
NM_001514	NM_001514	Transcription initiation factor IIB (General transcription factor TFIIB) (S300-II).	chr1 89091204
NM_001008661	NM_001008661	Novel protein.	chr1 89174043
NM_001008661	NM_001008662	Novel protein.	chr1 89174043
NM_001008661	BC000819	KAT3 protein.	chr1 89174050
AL833593	AL833593	Hypothetical protein DKFZp686D19113.	chr1 89174127
NM_019610	NM_019610	RBM1 (Fragment).	chr1 89218709
NM_018284	BC063819	GBP3 protein.	chr1 89244958
NM_018284	CR936755	Guanylate binding protein 3.	chr1 89244958
NM_018284	NM_018284	Hypothetical protein DKFZp564C2478.	chr1 89244958
NM_002053	NM_002053	Interferon-induced guanylate-binding protein 1 (GTP-binding protein 1) (Guanine nucleotide-binding protein 1) (HuGBP-1).	chr1 89290593
NM_004120	NM_004120	Interferon-induced guanylate-binding protein 2 (GTP-binding protein 2) (Guanine nucleotide-binding protein 2) (HuGBP-2).	chr1 89345897
NM_207398	NM_207398	Hypothetical protein FLJ38822.	chr1 89370057
NM_052941	NM_052941	Guanylate binding protein 4.	chr1 89420045
NM_052942	NM_052942	Interferon-induced guanylate-binding protein 5 (GTP-binding protein 5) (Guanine nucleotide-binding protein 5) (GBP-TA antigen).	chr1 89498852
NM_198460	BX537949	Hypothetical protein FLJ16335.	chr1 89602204
NM_198460	NM_198460	Hypothetical protein FLJ16335.	chr1 89602204
BC030607	BC030607	LRRC8B protein.	chr1 89763049
NM_015350	NM_015350	LRRC8B protein.	chr1 89796859
BC036122	BC036122	Hypothetical protein.	chr1 89871218
NM_032270	NM_032270	AD158.	chr1 89871349
NM_018103	NM_018103	Leucine-rich repeat-containing protein 5 precursor.	chr1 90060100
BC009550	BC009550	LOC492303 protein.	chr1 90231438
NM_182976	NM_182976	Zinc finger protein 326.	chr1 90233267
NM_020063	NM_020063	BarH-like 2 homeobox protein.	chr1 90950167
NM_201269	AB033047	Hypothetical protein FLJ13534.	chr1 91153446
NM_201269	AB033047	Hypothetical protein FLJ10725.	chr1 91153446
NM_201269	NM_201269	Zinc finger protein 644 (Zinc finger motif enhancer binding protein 2) (Zep-2).	chr1 91153447
NM_198550	NM_198550	Hypothetical protein FLJ36760 (Novel protein).	chr1 91498909
BX649037	BX649037	Novel protein (FLJ36760).	chr1 91500332
NM_003503	NM_003503	Cell division cycle 7-related protein kinase (EC 2.7.1.-) (CDC7- related kinase) (HsCdc7) (huCdc7).	chr1 91739031
NM_003243	L07594	TGF-beta receptor type III precursor (TGFR-3) (Transforming growth factor beta receptor III) (Betaglycan).	chr1 91920570
NM_003243	NM_003243	TGF-beta receptor type III precursor (TGFR-3) (Transforming growth factor beta receptor III) (Betaglycan).	chr1 91920574
NM_207189	NM_207189	BRDT protein (Fragment).	chr1 92187719
NM_173567	NM_173567	Abhydrolase domain containing 7.	chr1 92268145
NM_183242	AY346333	Double BTB/POZ domain containing protein.	chr1 92318449
NM_183242	NM_183242	BTB (POZ) domain containing 8.	chr1 92318480
NM_001012425	NM_001012425	Novel protein.	chr1 92456160
NM_007070	NM_007070	Glomulin, FKBP associated protein.	chr1 92484634
NM_007070	NM_053274	Glomulin (FKBP-associated protein) (FK506-binding protein-associated protein) (FAP).	chr1 92484634
NM_024813	NM_024813	Hypothetical protein FLJ13150.	chr1 92537194
NM_024813	BC031070	C1orf82 protein.	chr1 92537203
NM_005263	NM_005263	Zinc finger protein Gfi-1 (Growth factor independence 1).	chr1 92712909
NM_005665	NM_005665	Ecotropic viral integration site 5.	chr1 92746841
AB209513	AB209513	Ecotropic viral integration site 5 variant (Fragment).	chr1 92750066
NM_000969	NM_000969	60S ribosomal protein L5.	chr1 93070181
NM_000969	BC109370	Ribosomal protein L5 (Fragment).	chr1 93070197
NM_000969	BC001882	Ribosomal protein L5 (Fragment).	chr1 93070215
NM_001006605	NM_001006605	Hypothetical protein FAM69A.	chr1 93071040
CR600872	CR600872	Novel protein possible ortholog of mouse RIKEN cDNA 2900024C23 gene.	chr1 93080342
NM_007358	CR599562	n/a	chr1 93317422
NM_007358	NM_007358	Metal-response element-binding transcription factor 2 (Metal-response element DNA-binding protein M96).	chr1 93317430
NM_007358	AF086908	M96A-2.	chr1 93317454
NM_007358	BC010013	MTF2 protein.	chr1 93317455
AF072814	AF072814	n/a	chr1 93348390
NM_016040	NM_016040	Transmembrane emp24 domain containing protein 5 precursor.	chr1 93389998
CR601720	BC038511	TMED5 protein.	chr1 93392343
CR601720	CR601720	CGI-100 protein (CGI-100).	chr1 93392376
NM_206886	NM_206886	Sarcoma antigen NY-SAR-41 (NY-SAR-41) (Fragment).	chr1 93418507
AK126045	AK126045	CDNA FLJ44057 fis, clone TESTI4034912, weakly similar to Intracellular protein transport protein USO1.	chr1 93440101
NM_001938	NM_001938	TATA-binding protein-associated phosphoprotein (Down-regulator of transcription 1) (Dr1 protein) (Negative cofactor 2 beta) (NC2 beta).	chr1 93584065
NM_001024948	NM_001024948	FNBP1L protein (Formin binding protein 1-like) (Fragment).	chr1 93686426
NM_001024948	NM_017737	FNBP1L protein (Fragment).	chr1 93686426
AK000282	AK000282	FNBP1L protein (Fragment).	chr1 93768986
NM_003567	AL833121	Breast cancer anti-estrogen resistance 3.	chr1 93799934
NM_003567	BC039895	NSP2.	chr1 93799937
NM_003567	NM_003567	Breast cancer antiestrogen resistance 3 protein (SH2-containing protein Nsp2).	chr1 93799937
NM_014597	NM_014597	TdT interacting factor 2.	chr1 94107925
NM_002061	NM_002061	Glutamate--cysteine ligase regulatory subunit (EC 6.3.2.2) (Gamma- glutamylcysteine synthetase) (Gamma-ECS) (GCS light chain) (Glutamate--cysteine ligase modifier subunit).	chr1 94125177
NM_000350	AB210040	Hypothetical protein DKFZp781N1972.	chr1 94230983
NM_000350	AF000148	Hypothetical protein DKFZp781N1972.	chr1 94230983
NM_000350	AF000148	Retinal-specific ATP-binding cassette transporter (ATP-binding cassette sub-family A member 4) (RIM ABC transporter) (RIM protein) (RmP) (Stargardt disease protein).	chr1 94230983
NM_000350	NM_000350	Retinal-specific ATP-binding cassette transporter (ATP-binding cassette sub-family A member 4) (RIM ABC transporter) (RIM protein) (RmP) (Stargardt disease protein).	chr1 94230983
NM_004815	NM_004815	PTPL1-associated RhoGAP 1.	chr1 94410481
U90920	U90920	PTPL1-associated RhoGAP.	chr1 94410758
BC022483	BC022483	ARHGAP29 protein (PTPL1-associated RhoGAP 1) (PARG1).	chr1 94440043
NM_002858	BC068509	ABCD3 protein.	chr1 94656559
NM_002858	BC009712	ABCD3 protein (ATP-binding cassette, sub-family D (ALD), member 3).	chr1 94656594
NM_002858	NM_002858	ATP-binding cassette sub-family D member 3 (70 kDa peroxisomal membrane protein) (PMP70).	chr1 94656598
NM_001993	NM_001993	Tissue factor precursor (TF) (Coagulation factor III) (Thromboplastin) (CD142 antigen).	chr1 94767460
AF487337	AF487337	Tissue factor (Fragment).	chr1 94768605
BC033858	BC033858	Choline transporter-like protein 3 (Solute carrier family 44 member 3).	chr1 95058522
NM_152369	NM_152369	Choline transporter-like protein 3 (Solute carrier family 44 member 3).	chr1 95058764
NM_001839	NM_001839	Calponin-3 (Calponin, acidic isoform).	chr1 95135095
NM_144988	NM_144988	Hypothetical protein ALG14.	chr1 95220884
NM_152487	NM_152487	Hypothetical protein FLJ31842 (TMEM56 protein).	chr1 95355571
NM_015485	NM_015485	RWD domain containing protein 3.	chr1 95472354
NM_021190	AF530580	PTBP2 (Fragment).	chr1 96959953
NM_021190	AF530581	PTBP2 (Fragment).	chr1 96959953
NM_021190	NM_021190	Neural polypyrimidine tract binding protein (Splicing regulator nPTB1) (Polypyrimidine tract binding protein 2).	chr1 96959965
NM_021190	BC016582	Truncated non-neuronal splice variant nPTB5 (Fragment).	chr1 96959979
NM_021190	AB051233	Truncated non-neuronal splice variant nPTB5 (Fragment).	chr1 96959982
U20938	U20938	Dihydropyrimidine dehydrogenase [NADP+] precursor (EC 1.3.1.2) (DPD) (DHPDHase) (Dihydrouracil dehydrogenase) (Dihydrothymine dehydrogenase).	chr1 97315889
BC108742	BC108742	Hypothetical protein.	chr1 97957911
NM_001001688	NM_001001688	Hypothetical protein FLJ35409.	chr1 98281500
NM_015976	NM_015976	Sorting nexin-7.	chr1 98899800
NM_152238	NM_152238	Sorting nexin 7.	chr1 98900005
NM_001010861	NM_001010861	Novel protein (PAP2).	chr1 99128390
NM_001010861	NM_001037317	PAP2 protein (Fragment).	chr1 99128390
NM_014839	AB007924	Brain-specific phosphatidic acid phosphatase-like protein 1.	chr1 99502439
NM_014839	AK056665	Hypothetical protein FLJ32103.	chr1 99502487
NM_014839	NM_014839	Plasticity related gene 1 (Lipid phosphate phosphatase-related protein type 4) (PRG1).	chr1 99502487
NM_017734	NM_017734	C1orf11; alternative splicing form 1 (Paralemnin-like protein) (Palmdelphin) (Hypothetical protein FLJ20271).	chr1 99884185
NM_017734	BC012570	Hypothetical protein FLJ21001.	chr1 99884207
AL390972	AL390972	C1orf11; alternative splicing form 2.	chr1 99884485
NM_001013660	NM_001013660	Hypothetical protein FLJ16275.	chr1 99946846
NM_000028	NM_000028	Glycogen debranching enzyme (Glycogen debrancher) [Includes: 4-alpha- glucanotransferase (EC 2.4.1.25) (Oligo-1,4-1,4-glucantransferase); Amylo-alpha-1,6-glucosidase (EC 3.2.1.33) (Amylo-1,6-glucosidase) (Dextrin 6-alpha-D-glucosidase)].	chr1 100088632
NM_000646	NM_000646	Glycogen debranching enzyme (Glycogen debrancher) [Includes: 4-alpha- glucanotransferase (EC 2.4.1.25) (Oligo-1,4-1,4-glucantransferase); Amylo-alpha-1,6-glucosidase (EC 3.2.1.33) (Amylo-1,6-glucosidase) (Dextrin 6-alpha-D-glucosidase)].	chr1 100089118
NM_000645	NM_000645	n/a	chr1 100099353
NM_012243	NM_012243	UDP-N-acetylglucosamine transporter (Golgi UDP-GlcNAc transporter) (Solute carrier family 35 member A3).	chr1 100208127
NM_012243	BC005136	SLC35A3 protein.	chr1 100208149
CR749816	CR749816	UDP-N-acetylglucosamine transporter (Golgi UDP-GlcNAc transporter) (Solute carrier family 35 member A3).	chr1 100208579
NM_033055	NM_033055	Hippocampus abundant transcript 1 protein (Putative tetracycline transporter-like protein).	chr1 100276376
NM_194292	NM_194292	Spindle assembly abnormal protein 6 homolog (HsSAS-6).	chr1 100321691
BC101026	BC101026	SASS6 protein.	chr1 100323264
NM_019083	NM_019083	Hypothetical protein FLJ11219 (Hypothetical protein FLJ10287).	chr1 100371306
NM_019083	AK001149	Novel protein.	chr1 100371308
NM_019083	AK001149	Novel protein.	chr1 100371308
NM_144620	AL833417	OTTHUMP00000012587.	chr1 100387000
NM_144620	NM_144620	Hypothetical protein LRRC39 (Densin hlg) (OTTHUMP00000012531).	chr1 100387000
BC016675	BC016675	Lipoamide acyltransferase component of branched-chain alpha-keto acid dehydrogenase complex, mitochondrial precursor (EC 2.3.1.168) (Dihydrolipoyllysine-residue (2-methylpropanoyl)transferase) (E2) (Dihydrolipoamide branched chain transacylase) (BCKAD E2	chr1 100433463
J03208	J03208	Lipoamide acyltransferase component of branched-chain alpha-keto acid dehydrogenase complex, mitochondrial precursor (EC 2.3.1.168) (Dihydrolipoyllysine-residue (2-methylpropanoyl)transferase) (E2) (Dihydrolipoamide branched chain transacylase) (BCKAD E2	chr1 100433950
M19301	M19301	Dihydrolipoamide branched chain transacylase E2.	chr1 100448686
NM_003729	NM_003729	RNA 3'-terminal phosphate cyclase (EC 6.5.1.4) (RNA-3'-phosphate cyclase) (RNA cyclase).	chr1 100504350
NM_003729	BC012604	RNA 3'-terminal phosphate cyclase (EC 6.5.1.4) (RNA-3'-phosphate cyclase) (RNA cyclase).	chr1 100504392
NM_003672	NM_003672	Dual specificity protein phosphatase CDC14A (EC 3.1.3.48) (EC 3.1.3.16) (CDC14 cell division cycle 14 homolog A).	chr1 100590634
NM_003672	NM_033312	CDC14 cell division cycle 14 homolog A (S. cerevisiae).	chr1 100590634
NM_003672	NM_033313	CDC14 cell division cycle 14 homolog A (S. cerevisiae) (CDC14 homolog A, isoform 3).	chr1 100590634
BC038979	BC038979	n/a	chr1 100591036
NM_022049	NM_022049	Probable G-protein coupled receptor 88 (Striatum-specific G-protein coupled receptor).	chr1 100776280
NM_001078	NM_001078	Vascular cell adhesion protein 1 precursor (V-CAM 1) (CD106 antigen) (INCAM-100).	chr1 100957884
[truncated: 37,290 more rows]
