# Supplementary material for: Discovery of Genes Activated by the Mitochondrial Unfolded Protein Response (mtUPR) and Cognate Promoter Elements
Source: PLoS One. 2007 Sep 12;2(9):e874. doi: 10.1371/journal.pone.0000874 (PMC1964532; doi:10.1371/journal.pone.0000874)
Supplement: Data S3 — The list of predicted mitochondrial and non-mitochondrial "independent" genes used in the search algorithm (0.58 MB XLS) [file pone.0000874.s004.xls]

## Sheet: Predicted Mito
Table of predicted Mitochondrial "Independent" Genes and associated original genes and their descriptions.
This data derived from the work in: Xie, X., J. Lu, et al. (2005). "Systematic discovery of regulatory motifs in human promoters and 3' UTRs by comparison of several mammals." Nature 434(7031): 338-45
along with data downloaded from http://genome.ucsc.edu/ ref: Kent, W.J., Sugnet, C. W., Furey, T. S., Roskin, K.M., Pringle, T. H., Zahler, A. M., and Haussler, D. The Human Genome Browser at UCSC. Genome Res. 12(6), 996-1006 (2002).
Independent Gene	Original Gene	Original Gene Description	Original Gene Location
AB006589	AB006589	3pv2.	chr14 63763182
AB011163	AB011163	Kinesin-like protein KIF1B (Klp).	chr1 10194260
AB017133	AB017133	Kinesin-like protein KIF1B (Klp).	chr1 10214892
AB020644	AB020644	ACSL6 protein.	chr5 131315195
AB021660	AB021660	Carbonic anhydrase 5B, mitochondrial precursor (EC 4.2.1.1) (Carbonic anhydrase VB) (Carbonate dehydratase VB) (CA-VB).	chrX 15666312
AB026722	AB026722	n/a	chr4 106510168
AB026722	AF161473	Hypothetical protein PPA2 (Fragment).	chr4 106510166
AB033052	AB033052	Hypothetical protein FLJ14696.	chr5 65053956
AB040881	AB040881	Hypothetical protein FLJ13122.	chr1 10213408
AB055226	AB055226	HLAT1-3TM.	chr16 29361738
AB055227	AB055227	HLAT1-3TM.	chr16 21382026
AB067483	AB067483	OTTHUMP00000022249.	chr9 129893563
AB067483	AB067483	Small calcium-binding mitochondrial carrier 2.	chr9 129893563
AB075864	AB075864	OTTHUMP00000022606.	chr9 138813531
AB102894	AB102894	Thrombopoietin nirs variant 3.	chr3 185573838
AB209399	AB209399	Glycerol-3-phosphate dehydrogenase 3.	chr2 157000441
AB209399	AB209399	Hypothetical protein GPD2 (Fragment).	chr2 157000441
AB209620	AB209620	Estrogen receptor beta (ER-beta).	chr14 63767388
AF001903	AF001903	Short chain 3-hydroxyacyl-CoA dehydrogenase, mitochondrial precursor (EC 1.1.1.35) (HCDH) (Medium and short chain L-3-hydroxyacyl-coenzyme A dehydrogenase).	chr4 109130318
AF034374	AF034374	Molybdenum cofactor biosynthesis protein 1 A (MOCS1A).	chr6 39981074
AF034374	AK056740	OTTHUMP00000016354.	chr6 39981074
AF054505	AF054505	Solute carrier family 12 member 4 (Electroneutral potassium-chloride cotransporter 1) (Erythroid K-Cl cotransporter 1) (hKCC1).	chr16 66535888
AF054505	AF054506	Solute carrier family 12 member 4 (Electroneutral potassium-chloride cotransporter 1) (Erythroid K-Cl cotransporter 1) (hKCC1).	chr16 66535888
AF087890	AF087890	Succinyl-CoA ligase [ADP-forming] beta-chain, mitochondrial precursor (EC 6.2.1.5) (Succinyl-CoA synthetase, betaA chain) (SCS-betaA) (ATP- specific succinyl-CoA synthetase beta subunit).	chr13 47415084
AF095736	AF095736	Sarcosine dehydrogenase.	chr9 135573265
AF095737	AF095737	Hypothetical protein SARDH.	chr9 135580064
AF099740	AF099740	n/a	chr5 131170738
AF105253	AF105253	Hypothetical protein.	chr20 56848189
AF105253	BC036081	Hypothetical protein.	chr20 56848167
AF105253	BC036081	Neuroendocrine secretory protein 55 (NESP55).	chr20 56848167
AF105278	AF105278	Mitochondrial ribosomal protein L7/L12 (Fragment).	chr17 77281741
AF132973	AF132973	NADH-ubiquinone oxidoreductase B16.6 subunit (EC 1.6.5.3) (EC 1.6.99.3) (Complex I-B16.6) (CI-B16.6) (Gene associated with retinoic-interferon-induced mortality 19 protein) (GRIM-19) (Cell death-regulatory protein GRIM-19).	chr19 19488051
AF132973	BC009189	NADH-ubiquinone oxidoreductase B16.6 subunit (EC 1.6.5.3) (EC 1.6.99.3) (Complex I-B16.6) (CI-B16.6) (Gene associated with retinoic-interferon-induced mortality 19 protein) (GRIM-19) (Cell death-regulatory protein GRIM-19).	chr19 19488031
AF182417	AF182417	Mitochondrial 28S ribosomal protein S21 (S21mt) (MRP-S21).	chr1 148533376
AF212234	AF212234	Peroxisomal trans-2-enoyl-CoA reductase (EC 1.3.1.38) (TERP) (HPDHase) (pVI-ARL) (2,4-dienoyl-CoA reductase-related protein) (DCR-RP).	chr2 216612071
AF251043	AF251043	Acyl-CoA dehydrogenase, medium-chain specific, mitochondrial precursor (EC 1.3.99.3) (MCAD).	chr1 75963052
AF258559	AF258559	PP3564.	chr6 5048886
AF263293	AF257318	SH3 domain GRB2-like protein B1 (EC 2.3.1.-) (Endophilin B1) (Bax- interacting factor 1) (Bif-1).	chr1 86943145
AF263293	AF263293	SH3 domain GRB2-like protein B1 (EC 2.3.1.-) (Endophilin B1) (Bax- interacting factor 1) (Bif-1).	chr1 86943165
AF277180	AF277180	PNAS-122.	chr6 42283763
AF284768	AF284768	Laminin receptor-like protein LAMRL5.	chrX 86844932
AF285758	AF285758	Lysyl-tRNA synthetase (EC 6.1.1.6) (Lysine--tRNA ligase) (LysRS).	chr16 74219293
AF292005	AF292005	Twinkle protein, mitochondrial precursor (EC 3.6.1.-) (T7 gp4-like protein with intramitochondrial nucleoid localization) (T7-like mitochondrial DNA helicase) (Progressive external ophthalmoplegia 1 protein).	chr10 102737772
AF309387	AF309387	Oxidation protection protein.	chr8 107788380
AF318367	AF318367	Hypothetical protein pp8875.	chr9 138840869
AF447877	AF447877	Hypothetical protein FP634.	chr11 125646049
AF539453	AF539453	Bcl-rambo variant beta.	chr22 16518477
AJ275973	AJ275973	ATP-binding cassette protein.	chr17 64755170
AJ512612	AJ512612	ABCA5 transporter.	chr17 64781678
AJ512835	AJ512835	Putative calcium binding transporter.	chr19 6394572
AK000540	AK000540	Hypothetical protein FLJ20533.	chr8 75053554
AK000765	AK000765	Hypothetical protein FLJ20758.	chr2 86205631
AK022291	AK022291	Hypothetical protein FLJ12229.	chr19 45901912
AK022713	AK022713	Hypothetical protein FLJ12651.	chr1 172076673
AK022724	AK022724	Hypothetical protein FLJ12662.	chr3 159852680
AK024791	AK024791	Hypothetical protein FLJ21138.	chr4 79023475
AK025618	AK025618	Hypothetical protein FLJ21965.	chr6 30995923
AK025618	AK025618	Hypothetical protein FLJ21965.	chr6_cox_hap1 2336378
AK026063	AK026063	CDNA: FLJ22410 fis, clone HRC08422.	chr6 30998480
AK026063	AK026063	CDNA: FLJ22410 fis, clone HRC08422.	chr6_cox_hap1 2338935
AK026063	AK026063	CDNA: FLJ22410 fis, clone HRC08422.	chr6_qbl_hap2 2137439
AK027337	AK027337	Hypothetical protein FLJ14431.	chr4 170158894
AK027602	AK027602	Hypothetical protein FLJ14696.	chr5 65117355
AK027747	AK027747	Hypothetical protein FLJ14841.	chr11 45783275
AK056533	AK056533	Hypothetical protein FLJ31971.	chr17 64754880
AK075271	AK075271	CDNA FLJ90790 fis, clone THYRO1001529, moderately similar to Serine palmitoyltransferase 2 (EC 2.3.1.50).	chr20 13055316
AK075438	AK075438	CDNA PSEC0129 fis, clone PLACE1004170.	chr16 56038837
AK092026	AK092026	Hypothetical protein FLJ34707.	chr3 9856584
AK092181	AK092181	Hypothetical protein FLJ34862.	chr11 85850720
AK092416	AK092416	Hypothetical protein DKFZp686P18130.	chr18 53367739
AK092416	BC039841	Hypothetical protein DKFZp686P18130.	chr18 53367739
AK094254	AK094254	Hypothetical protein FLJ36935.	chrX 118417314
AK094614	AK094614	Hypothetical protein FLJ37295.	chr12 70619023
AK094706	AK094706	Hypothetical protein FLJ37387.	chr6 126282170
AK095084	AK095084	Hypothetical protein FLJ37765.	chr17 37277352
AK096148	AK096148	Hypothetical protein FLJ38829.	chr8 107699529
AK096990	AK096990	Coiled-coil-helix-coiled-coil-helix domain containing protein 5.	chr2 113058642
AK123561	AK123561	Nucleoside diphosphate-linked moiety X motif 8, mitochondrial precursor (EC 3.6.1.-) (Nudix motif 8).	chr11 67151985
AK123561	BC018644	Nucleoside diphosphate-linked moiety X motif 8, mitochondrial precursor (EC 3.6.1.-) (Nudix motif 8).	chr11 67151985
AK125717	AK125717	Putative eukaryotic translation initiation factor 3 subunit (eIF-3).	chr17 2539431
AK126402	AK126402	Hypothetical protein FLJ44438.	chr2 99124379
AK127143	AK127143	Hypothetical protein FLJ45200.	chr16 88593882
AK127173	AK127173	L-seryl-tRNA(Ser/Sec) kinase (EC 2.7.1.-) (Phosphoseryl-tRNA(Ser/Sec) kinase).	chr10 124729919
AK127598	AK127598	Hypothetical protein FLJ45695.	chr19 46574501
AK172788	AK172788	Mitchondrial carnitine/acylcarnitine carrier protein CACL (CACT-like).	chr14 99827207
AK222618	AK222618	NADH-ubiquinone oxidoreductase 49 kDa subunit, mitochondrial precursor (EC 1.6.5.3) (EC 1.6.99.3) (Complex I-49KD) (CI-49KD).	chr1 159438794
AK223365	AK223365	Creatine kinase, ubiquitous mitochondrial precursor (EC 2.7.3.2) (U- MtCK) (Mia-CK) (Acidic-type mitochondrial creatine kinase).	chr15 41673536
AK223365	AK223365	Creatine kinase, ubiquitous mitochondrial precursor (EC 2.7.3.2) (U- MtCK) (Mia-CK) (Acidic-type mitochondrial creatine kinase).	chr15 41773368
AL136647	AL136647	Hypothetical protein DKFZp564C1362.	chr16 18986739
AL136922	AL136922	Hypothetical protein DKFZp586J151.	chr15 63227609
AL831978	AL831978	Hypothetical protein DKFZp451E113 (Fragment).	chr3 137451906
AL831982	AL831982	Hypothetical protein DKFZp451F173.	chr22 16501576
AL832016	AL832016	Hypothetical protein DKFZp451F074 (Fragment).	chr8 17453754
AY028897	AY028897	Hypothetical protein FLJ25441.	chr17 64754686
AY049784	AY049784	Nardilysin.	chr1 52029884
AY330488	AY330488	Alpha-methylacyl-CoA racemase IIB.	chr5 34033105
AY330488	AY330489	Alpha-methyl-acyl-CoA racemase IIAs.	chr5 34033065
AY335194	AY335194	HIRA-interacting protein 5.	chr2 69476396
AY462283	AY462283	CDK5 regulatory subunit associated protein 1 transcript variant 3.	chr20 31411691
AY462283	AY462284	CDK5 regulatory subunit associated protein 1 transcript variant 4.	chr20 31411691
AY493416	AY493416	Bifunctional aminoacyl-tRNA synthetase [Includes: Glutamyl-tRNA synthetase (EC 6.1.1.17) (Glutamate--tRNA ligase); Prolyl-tRNA synthetase (EC 6.1.1.15) (Proline--tRNA ligase)].	chr1 218208642
AY597807	AY597807	Hypothetical protein.	chr11 64900241
AY616183	AY616183	NADP(H)-dependent retinol dehydrogenase/reductase short isoform-like protein 1.	chr14 23508987
AY616183	AY943857	NADP(H)-dependent retinol dehydrogenase/reductase A1 like protein 1.	chr14 23508987
AY629351	AY629351	Zinc finger CCHC domain containing protein 4.	chr4 24923505
AY858838	AY858838	Vitamin D 24-hydroxylase splice variant.	chr20 52204658
AY958431	AY958431	Methionine sulfoxide reductase A2 (EC 1.8.4.6).	chr8 9990475
BC000140	BC000140	Propionyl Coenzyme A carboxylase, alpha polypeptide (Fragment).	chr13 99539397
BC000140	BC000140	Propionyl-CoA carboxylase alpha chain, mitochondrial precursor (EC 6.4.1.3) (PCCase alpha subunit) (Propanoyl-CoA:carbon dioxide ligase alpha subunit).	chr13 99539397
BC000147	BC000147	ME2 protein.	chr18 46659487
BC000629	BC000629	Hypothetical protein DKFZp781B11202.	chr2 136381301
BC001121	BC001121	Deoxyguanosine kinase, isoform c.	chr2 74007521
BC001121	BC015757	DGUOK protein.	chr2 74007521
BC001407	BC001407	SLC25A16 protein.	chr10 69955226
BC001656	BC001656	Mitochondrial ATP-Mg/Pi carrier protein (Fragment).	chr19 6387092
BC001664	BC001664	POU domain, class 2, transcription factor 1.	chr1 165565121
BC002429	AF306863	Hepatopoietin protein.	chr16 1974220
BC002429	BC002429	Augmenter of liver regeneration (hERV1 protein).	chr16 1974222
BC002429	BC002429	Hepatopoietin.	chr16 1974222
BC002698	BC002698	HSPC009.	chr17 38203178
BC002702	BC002702	Mitochondrial ornithine transporter 1 (Solute carrier family 25 member 15).	chr13 40261632
BC002790	BC002790	SA protein.	chr16 20688811
BC003102	BC003102	NADH-ubiquinone oxidoreductase subunit B14.5a (EC 1.6.5.3) (EC 1.6.99.3) (Complex I-B14.5a) (CI-B14.5a).	chr19 8282233
BC004366	BC004366	MGC10334 protein.	chr1 1252935
BC004366	BC004366	MGC10334 protein.	chr1_random 218938
BC006117	BC006117	L2HGDH protein.	chr14 49774035
BC007542	BC007542	KIAA1984 protein.	chr9 138820454
BC007722	BC007722	Glycyl-tRNA synthetase (EC 6.1.1.14) (Glycine--tRNA ligase) (GlyRS).	chr7 30601015
BC008353	BC008353	Glycine-N-acyltransferase.	chr11 58451749
BC008497	BC008497	Hypothetical protein IMMP2L (Fragment).	chr7 110389603
BC008629	BC008629	MTHFD1L protein.	chr6 151308334
BC008855	BC008855	GNAS complex locus.	chr20 56899860
BC008855	BC008855	Guanine nucleotide-binding protein G(s), alpha subunit (Adenylate cyclase-stimulating G alpha protein).	chr20 56899860
BC009403	BC009403	Fumarylacetoacetate hydrolase domain containing 2A (Hypothetical protein CGI-105).	chr2 95432200
BC009617	BC009617	Hypothetical protein.	chr10 11824439
BC009858	BC009858	Homo sapiens clone CDABP0091 mRNA sequence.	chr19 10223898
BC010123	BC010123	Hypothetical protein DKFZp586J0724.	chr3 15272099
BC010123	BC010123	Hypothetical protein DKFZp686F05233.	chr3 15272099
BC010354	AK098770	Growth hormone inducible transmembrane protein.	chr10 85889291
BC010354	BC010354	Growth hormone inducible transmembrane protein (Dermal papilla derived protein 2) (Transmembrane BAX inhibitor motif-containing protein 5).	chr10 85889294
BC012081	BC012081	C6orf96 protein.	chr6 151799064
BC012489	BC012489	n/a	chr15 86811930
BC012573	BC012573	Acyl-Coenzyme A thioesterase 2, mitochondrial.	chrX 23641164
BC013049	BC002814	n/a	chr9 124072947
BC013049	BC013049	Ribosome recycling factor, mitochondrial precursor.	chr9 124072966
BC013049	BC013049	n/a	chr9 124072966
BC013771	BC013771	GTP:AMP phosphotransferase (Adenylate kinase 3 like 1).	chr9 4702068
BC013771	BC013771	GTP:ATP phosphotransferase.	chr9 4702068
BC013969	BC013969	Protein C20orf45.	chr20 57041595
BC015013	AY032628	Mitochondrial solute carrier.	chr8 23442424
BC015013	AY032628	PRO1278.	chr8 23442424
BC015013	BC015013	Mitochondria solute carrier protein (SLC25A37 protein).	chr8 23442447
BC015625	BC015625	Probable tyrosyl-tRNA synthetase, mitochondrial precursor (EC 6.1.1.1) (Tyrosine--tRNA ligase) (TyrRS).	chr12 32791226
BC016675	BC016675	Lipoamide acyltransferase component of branched-chain alpha-keto acid dehydrogenase complex, mitochondrial precursor (EC 2.3.1.168) (Dihydrolipoyllysine-residue (2-methylpropanoyl)transferase) (E2) (Dihydrolipoamide branched chain transacylase) (BCKAD E2	chr1 100433463
BC019874	BC019874	GPD2 protein.	chr2 157001242
BC020750	BC020750	SDS protein.	chr12 112316540
BC021245	BC021245	AFG3-like protein 1 (EC 3.4.24.-) (Fragment).	chr16 88572761
BC022368	BC022368	PRO1304 (NDUFS1 protein).	chr2 206697071
BC022968	BC022968	SLC7A14 protein.	chr3 171667312
BC026161	AF129166	Long-chain-fatty-acid--CoA ligase 6 (EC 6.2.1.3) (Long-chain acyl-CoA synthetase 6) (LACS 6).	chr5 131317510
BC026161	BC026161	ACSL6 protein.	chr5 131317500
BC026161	BC047453	ACSL6 protein.	chr5 131317492
BC027731	BC027731	MTRF1 protein.	chr13 40724418
BC030783	BC030783	Hypothetical protein FLJ23943.	chr10 113902491
BC031332	BC031332	NDUFA10 protein.	chr2 240606501
BC031999	BC031999	Hydroxy-delta-5-steroid dehydrogenase, 3 beta-and steroid delta- isomerase 1.	chr1 119851536
BC032456	BC032456	OTTHUMP00000021598.	chr9 88144564
BC032525	BC032525	SLC30A6 protein.	chr2 32276330
BC032584	BC032584	SHMT2 protein.	chr12 55909760
BC033091	BC033091	SLC25A27 protein.	chr6 46728637
BC033675	BC033675	dTDP-D-glucose 4,6-dehydratase (EC 4.2.1.46).	chr13 94024309
BC033687	BC033687	Methionyl-tRNA formyltransferase, mitochondrial precursor (EC 2.1.2.9) (MtFMT).	chr15 63081903
BC033762	BC033762	Hypothetical protein FLJ21832 (PEO1 protein).	chr10 102738300
BC033864	BC033864	BCAT1 protein.	chr12 24878039
BC035499	BC035499	PNAS-102.	chr5 10303370
BC036839	BC036839	OTTHUMP00000016356 (Fragment).	chr6 39975333
BC036869	BC036869	LOC283130 protein.	chr11 64899241
BC040013	BC040013	KIAA1970 protein.	chr16 23443843
BC040138	BC040138	Na-K-2Cl cotransporter (Fragment).	chr15 46287022
BC040376	BC040376	Hypothetical protein FLJ12603.	chr1 218334344
BC040376	BC040376	IARS2 protein.	chr1 218334344
BC042999	BC042999	ASXL2 protein.	chr2 25818300
BC045173	BC045173	Hypothetical protein FLJ12651.	chr1 172060440
BC045173	BC045173	Hypothetical protein FLJ12692.	chr1 172060440
BC047680	BC047680	PRO1238.	chr14 95071129
BC059370	BC059370	GLS2 protein.	chr12 55165490
BC063295	BC063295	Hypothetical protein CNNM4.	chr2 96790365
BC063295	BC063295	Hypothetical protein FLJ12771.	chr2 96790365
BC064369	BC064369	Hypothetical protein DKFZp686M1669.	chr2 74914773
BC064930	BC064930	Hypothetical protein FLJ23955.	chr1 227719212
BC064930	BC064930	PNAS-126.	chr1 227719212
BC065560	BC065560	Nitrogen fixation 1 (S. cerevisiae).	chr20 33720301
BC066960	BC066960	Glycerol kinase, testis specific 1 (EC 2.7.1.30) (ATP:glycerol 3- phosphotransferase) (Glycerokinase) (GK).	chr4 166418413
BC069010	BC069010	C20orf155 protein.	chr20 5934795
BC070271	BC070271	C6orf96 protein.	chr6 151807869
BC071656	BC071656	IMAA protein.	chr16 21436732
BC072388	BC072388	OXCT2 protein.	chr1 39753124
BC072411	BC072411	Hypothetical protein FLJ22578.	chr17 32032197
BC075805	BC075805	OPA1 protein.	chr3 194793706
BC076399	AL831943	NPD016 (Hypothetical protein DKFZp547C109).	chr10 101360264
BC076399	BC076399	Mitochondrial RNA splicing protein 3/4 (Putative mitochondrial solute carrier splice variant).	chr10 101360271
BC076399	BC076399	SLC25A28 protein (Fragment).	chr10 101360271
BC091479	BC091479	Serine dehydratase-like (Serine dehydratase-2) (SDSL protein).	chr12 112344600
BC093991	BC093991	Heat-shock protein beta-9 (HspB9).	chr17 37528360
BC100022	BC100022	Adenylate kinase isoenzyme 1 (EC 2.7.4.3) (ATP-AMP transphosphorylase) (AK1) (Myokinase).	chr9 129669941
BC104928	BC104928	GNAS complex locus.	chr20 56900046
BC106750	BC106750	Hypothetical protein DKFZp547K106 (Fragment).	chr18 12397937
BC112239	BC112239	Hypothetical protein FLJ37964.	chr1 150086415
BX538153	BX538153	Hypothetical protein DKFZp686J1643.	chr16 68705775
BX641077	BX641077	Zinc finger CCHC domain containing protein 6.	chr9 88093124
BX647765	BX647765	Hypothetical protein DKFZp686N0152.	chr8 11739243
BX648853	BX648853	Hypothetical protein DKFZp686K14231.	chr4 56909871
BX957216	BX957216	Hypothetical protein DKFZp781E0833.	chr22 18261782
CR456445	BC080631	TRMU protein.	chr22 45110299
CR456445	CR456445	DJ1163J1.4 protein.	chr22 45110305
CR600486	AK123513	Hypothetical protein FLJ41519.	chr14 23978813
CR600486	BC000989	C14orf124 protein.	chr14 23978813
CR600486	CR600486	Full-length cDNA clone CS0DC001YO07 of Neuroblastoma of Homo sapiens (human).	chr14 23978842
CR606096	BC013069	CCBL1 protein.	chr9 130635216
CR606096	BC033685	Cysteine conjugate-beta lyase; cytoplasmic (Glutamine transaminase K, kyneurenine aminotransferase).	chr9 130635219
CR606096	CR606096	Kynurenine--oxoglutarate transaminase I (EC 2.6.1.7) (Kynurenine aminotransferase I) (KATI) (Glutamine--phenylpyruvate transaminase) (EC 2.6.1.64) (Glutamine transaminase K) (GTK) (Cysteine-S-conjugate beta-lyase) (EC 4.4.1.13).	chr9 130635234
CR614959	BC000124	Sideroflexin-3.	chr10 102782158
CR614959	CR614959	Sideroflexin-3.	chr10 102782196
CR627369	CR627369	Hypothetical protein DKFZp781D08126 (RNASEL protein).	chr1 180813878
CR749308	CR749308	Branched-chain-amino-acid aminotransferase, cytosolic (EC 2.6.1.42) (BCAT(c)) (ECA39 protein).	chr12 24859016
CR749342	CR749342	Hypothetical protein DKFZp781L1143.	chr12 108020338
CR933664	CR933664	Hypothetical protein DKFZp781K1356.	chr7 122964289
DQ141240	BC002945	OTTHUMP00000022610.	chr9 138822431
DQ141240	BC021095	Hypothetical protein FLJ14680.	chr9 138822490
DQ141240	DQ141240	PARF.	chr9 138822469
J03208	J03208	Lipoamide acyltransferase component of branched-chain alpha-keto acid dehydrogenase complex, mitochondrial precursor (EC 2.3.1.168) (Dihydrolipoyllysine-residue (2-methylpropanoyl)transferase) (E2) (Dihydrolipoamide branched chain transacylase) (BCKAD E2	chr1 100433950
M19301	M19301	Dihydrolipoamide branched chain transacylase E2.	chr1 100448686
M98045	M98045	Folylpolyglutamate synthase.	chr9 129605080
NM_000016	NM_000016	Acyl-CoA dehydrogenase, medium-chain specific, mitochondrial precursor (EC 1.3.99.3) (MCAD).	chr1 75962869
NM_000017	NM_000017	Acyl-CoA dehydrogenase, short-chain specific, mitochondrial precursor (EC 1.3.99.2) (SCAD) (Butyryl-CoA dehydrogenase).	chr12 119648048
NM_000018	NM_000018	Acyl-CoA dehydrogenase, very-long-chain specific, mitochondrial precursor (EC 1.3.99.-) (VLCAD).	chr17 7063876
NM_000018	NM_001033859	n/a	chr17 7063876
NM_000019	BC010942	ACAT1 protein.	chr11 107497503
NM_000019	NM_000019	Acetyl-CoA acetyltransferase, mitochondrial precursor (EC 2.3.1.9) (Acetoacetyl-CoA thiolase) (T2).	chr11 107497467
NM_000026	NM_000026	Adenylosuccinate lyase (EC 4.3.2.2) (Adenylosuccinase) (ASL) (ASASE).	chr22 39072508
NM_000026	S60710	Adenylosuccinate lyase (EC 4.3.2.2) (Adenylosuccinase) (ASL) (ASASE).	chr22 39072509
NM_000030	NM_000030	Serine--pyruvate aminotransferase (EC 2.6.1.51) (SPT) (Alanine-- glyoxylate aminotransferase) (EC 2.6.1.44) (AGT).	chr2 241456834
NM_000032	BC030230	PRO2399.	chrX 55052215
NM_000032	NM_000032	5-aminolevulinate synthase, erythroid-specific, mitochondrial precursor (EC 2.3.1.37) (5-aminolevulinic acid synthase) (Delta- aminolevulinate synthase) (Delta-ALA synthetase) (ALAS-E).	chrX 55052213
NM_000032	NM_001037967	Aminolevulinate, delta-, synthase 2 (Sideroblastic/hypochromic anemia).	chrX 55052213
NM_000032	NM_001037968	Aminolevulinate, delta-, synthase 2 (Sideroblastic/hypochromic anemia).	chrX 55052213
NM_000032	NM_001037969	PRO2399.	chrX 55052213
NM_000032	X56352	5-aminolevulinate synthase, erythroid-specific, mitochondrial precursor (EC 2.3.1.37) (5-aminolevulinic acid synthase) (Delta- aminolevulinate synthase) (Delta-ALA synthetase) (ALAS-E).	chrX 55052216
NM_000033	NM_000033	ATP-binding cassette sub-family D member 1 (Adrenoleukodystrophy protein) (ALDP).	chrX 152643529
NM_000039	NM_000039	Apolipoprotein A-I precursor (Apo-AI) (ApoA-I) [Contains: Apolipoprotein A-I(1-242)].	chr11 116211678
NM_000039	NM_000039	Apolipoprotein A-I precursor (Apo-AI) (ApoA-I) [Contains: Apolipoprotein A-I(1-242)].	chr22_random 13497
NM_000053	NM_000053	Copper-transporting ATPase 2 (EC 3.6.3.4) (Copper pump 2) (Wilson disease-associated protein).	chr13 51404805
NM_000053	NM_001005918	n/a	chr13 51404805
NM_000097	NM_000097	Coproporphyrinogen III oxidase, mitochondrial precursor (EC 1.3.3.3) (Coproporphyrinogenase) (Coprogen oxidase) (COX).	chr3 99780981
NM_000098	NM_000098	Carnitine O-palmitoyltransferase II, mitochondrial precursor (EC 2.3.1.21) (CPT II).	chr1 53434688
NM_000108	NM_000108	Dihydrolipoyl dehydrogenase, mitochondrial precursor (EC 1.8.1.4) (Dihydrolipoamide dehydrogenase) (Glycine cleavage system L protein).	chr7 107318846
NM_000126	NM_000126	Electron transfer flavoprotein alpha-subunit, mitochondrial precursor (Alpha-ETF).	chr15 74295690
NM_000140	NM_000140	Ferrochelatase, mitochondrial precursor (EC 4.99.1.1) (Protoheme ferro-lyase) (Heme synthetase).	chr18 53366534
NM_000140	NM_001012515	Ferrochelatase, mitochondrial precursor (EC 4.99.1.1) (Protoheme ferro-lyase) (Heme synthetase).	chr18 53366534
NM_000143	NM_000143	Fumarate hydratase, mitochondrial precursor (EC 4.2.1.2) (Fumarase).	chr1 239727527
NM_000144	NM_000144	Frataxin, mitochondrial precursor (Friedreich ataxia protein) (Fxn) [Contains: Frataxin intermediate form].	chr9 70840163
NM_000144	NM_181425	Frataxin, mitochondrial precursor (Friedreich ataxia protein) (Fxn) [Contains: Frataxin intermediate form].	chr9 70840163
NM_000159	NM_000159	Glutaryl-CoA dehydrogenase, mitochondrial precursor (EC 1.3.99.7) (GCD).	chr19 12862973
NM_000159	NM_013976	n/a	chr19 12862973
NM_000161	NM_000161	GTP cyclohydrolase I (EC 3.5.4.16) (GTP-CH-I).	chr14 54378475
NM_000161	NM_001024070	GTP cyclohydrolase I type V (EC 3.5.4.16) (Fragment).	chr14 54378475
NM_000161	NM_001024071	GTP cyclohydrolase I type VI (EC 3.5.4.16) (Fragment).	chr14 54378475
NM_000162	NM_000162	Glucokinase (EC 2.7.1.2) (Hexokinase-4) (Hexokinase type IV) (HK IV) (HK4) (Hexokinase-D).	chr7 44150394
NM_000162	NM_033507	n/a	chr7 44150394
NM_000162	NM_033508	n/a	chr7 44150394
NM_000167	NM_000167	Glycerol kinase (EC 2.7.1.30) (ATP:glycerol 3-phosphotransferase) (Glycerokinase) (GK).	chrX 30581460
NM_000167	NM_203391	Glycerol kinase (EC 2.7.1.30) (ATP:glycerol 3-phosphotransferase) (Glycerokinase) (GK).	chrX 30581460
NM_000175	NM_000175	Glucose-6-phosphate isomerase (EC 5.3.1.9) (GPI) (Phosphoglucose isomerase) (PGI) (Phosphohexose isomerase) (PHI) (Neuroleukin) (NLK) (Sperm antigen 36) (SA-36).	chr19 39547908
NM_000182	NM_000182	Trifunctional enzyme alpha subunit, mitochondrial precursor (TP-alpha) (78 kDa gastrin-binding protein) [Includes: Long-chain enoyl-CoA hydratase (EC 4.2.1.17); Long chain 3-hydroxyacyl-CoA dehydrogenase (EC 1.1.1.211)].	chr2 26267012
NM_000183	NM_000183	Trifunctional enzyme beta subunit, mitochondrial precursor (TP-beta) [Includes: 3-ketoacyl-CoA thiolase (EC 2.3.1.16) (Acetyl-CoA acyltransferase) (Beta-ketothiolase)].	chr2 26321324
NM_000188	NM_000188	Hexokinase-1 (EC 2.7.1.1) (Hexokinase type I) (HK I) (Brain form hexokinase).	chr10 70748628
NM_000189	NM_000189	Hexokinase-2 (EC 2.7.1.1) (Hexokinase type II) (HK II) (Muscle form hexokinase).	chr2 74913289
NM_000191	BC010570	3-hydroxymethyl-3-methylglutaryl-Coenzyme A lyase (Hydroxymethylglutaricaciduria).	chr1 24000963
NM_000191	NM_000191	Hydroxymethylglutaryl-CoA lyase, mitochondrial precursor (EC 4.1.3.4) (HMG-CoA lyase) (HL) (3-hydroxy-3-methylglutarate-CoA lyase).	chr1 24000954
NM_000198	CR627415	Hypothetical protein DKFZp686G19280.	chr1 119759295
NM_000198	NM_000198	3 beta-hydroxysteroid dehydrogenase/delta 5-->4-isomerase type II (3Beta-HSD II) [Includes: 3-beta-hydroxy-delta(5)-steroid dehydrogenase (EC 1.1.1.145) (3-beta-hydroxy-5-ene steroid dehydrogenase) (Progesterone reductase); Steroid delta-isomerase (EC 5.3	chr1 119759295
NM_000240	NM_000240	Amine oxidase [flavin-containing] A (EC 1.4.3.4) (Monoamine oxidase type A) (MAO-A).	chrX 43400352
NM_000250	NM_000250	Myeloperoxidase precursor (EC 1.11.1.7) (MPO) [Contains: 89 kDa myeloperoxidase; 84 kDa myeloperoxidase; Myeloperoxidase light chain; Myeloperoxidase heavy chain].	chr17 53702215
NM_000250	X04876	Myeloperoxidase precursor (EC 1.11.1.7) (MPO) [Contains: 89 kDa myeloperoxidase; 84 kDa myeloperoxidase; Myeloperoxidase light chain; Myeloperoxidase heavy chain].	chr17 53702200
NM_000250	X04876	n/a	chr17 53702200
NM_000255	NM_000255	Methylmalonyl-CoA mutase, mitochondrial precursor (EC 5.4.99.2) (MCM) (Methylmalonyl-CoA isomerase).	chr6 49506957
NM_000274	BC016928	Hypothetical protein DKFZp781A11155.	chr10 126075867
NM_000274	NM_000274	Ornithine aminotransferase, mitochondrial precursor (EC 2.6.1.13) (Ornithine--oxo-acid aminotransferase) [Contains: Ornithine aminotransferase, hepatic form; Ornithine aminotransferase, renal form].	chr10 126075861
NM_000284	BC002406	Pyruvate dehydrogenase (Lipoamide) alpha 1.	chrX 19272019
NM_000284	CR614489	Pyruvate dehydrogenase E1 component alpha subunit, somatic form, mitochondrial precursor (EC 1.2.4.1) (PDHE1-A type I).	chrX 19272002
NM_000284	NM_000284	Pyruvate dehydrogenase E1 component alpha subunit, somatic form, mitochondrial precursor (EC 1.2.4.1) (PDHE1-A type I).	chrX 19271971
NM_000300	NM_000300	Phospholipase A2, membrane associated precursor (EC 3.1.1.4) (Phosphatidylcholine 2-acylhydrolase) (Group IIA phospholipase A2) (GIIC sPLA2) (Non-pancreatic secretory phospholipase A2) (NPS-PLA2).	chr1 20174517
NM_000309	NM_000309	Protoporphyrinogen oxidase (EC 1.3.3.4) (PPO).	chr1 159402817
NM_000349	NM_000349	Steroidogenic acute regulatory protein, mitochondrial precursor (StAR) (StARD1).	chr8 38119374
NM_000349	NM_001007243	Mitochondrial steroid acute regulatory protein (Fragment).	chr8 38119374
NM_000353	NM_000353	Tyrosine aminotransferase (EC 2.6.1.5) (L-tyrosine:2-oxoglutarate aminotransferase) (TAT).	chr16 70158254
NM_000382	NM_000382	Fatty aldehyde dehydrogenase (EC 1.2.1.3) (Aldehyde dehydrogenase, microsomal) (Aldehyde dehydrogenase family 3 member A2).	chr17 19492655
NM_000382	NM_001031806	Fatty aldehyde dehydrogenase (EC 1.2.1.3) (Aldehyde dehydrogenase, microsomal) (Aldehyde dehydrogenase family 3 member A2).	chr17 19492655
NM_000387	NM_000387	Mitochondrial carnitine/acylcarnitine carrier protein (Carnitine/acylcarnitine translocase) (CAC).	chr3 48869368
NM_000408	NM_000408	Glycerol-3-phosphate dehydrogenase, mitochondrial precursor (EC 1.1.99.5) (GPD-M) (GPDH-M) (mtGPD).	chr2 157001165
NM_000411	NM_000411	Biotin--protein ligase (EC 6.3.4.-) (Biotin apo-protein ligase) [Includes: Biotin--[methylmalonyl-CoA-carboxytransferase] ligase (EC 6.3.4.9); Biotin--[propionyl-CoA-carboxylase [ATP-hydrolyzing]] ligase (EC 6.3.4.10) (Holocarboxylase synthetase) (HCS); B	chr21 37045062
NM_000414	NM_000414	Peroxisomal multifunctional enzyme type 2 (MFE-2) (D-bifunctional protein) (DBP) (17-beta-hydroxysteroid dehydrogenase 4) (17-beta-HSD 4) [Includes: D-3-hydroxyacyl-CoA dehydratase (EC 4.2.1.-); 3- hydroxyacyl-CoA dehydrogenase (EC 1.1.1.35)].	chr5 118816123
NM_000436	NM_000436	Succinyl-CoA:3-ketoacid-coenzyme A transferase 1, mitochondrial precursor (EC 2.8.3.5) (Somatic-type succinyl CoA:3-oxoacid CoA- transferase) (Scot-S).	chr5 41765924
NM_000454	NM_000454	Superoxide dismutase [Cu-Zn] (EC 1.15.1.1).	chr21 31953805
NM_000456	NM_000456	Sulfite oxidase, mitochondrial precursor (EC 1.8.3.1).	chr12 54677309
NM_000481	BC044792	AMT protein.	chr3 49429215
NM_000481	NM_000481	Aminomethyltransferase, mitochondrial precursor (EC 2.1.2.10) (Glycine cleavage system T protein) (GCVT).	chr3 49429215
NM_000497	AK094090	Hypothetical protein FLJ36771.	chr8 143950773
NM_000497	NM_000497	Cytochrome P450 11B1, mitochondrial precursor (EC 1.14.15.4) (CYPXIB1) (P450C11) (P-450c11) (Steroid 11-beta-hydroxylase).	chr8 143950776
NM_000497	NM_001026213	Cytochrome P450, family 11, subfamily B, polypeptide 1, isoform 2.	chr8 143950776
NM_000498	NM_000498	Cytochrome P450 11B2, mitochondrial precursor (EC 1.14.15.4) (EC 1.14.15.5) (CYPXIB2) (P-450Aldo) (Aldosterone synthase) (ALDOS) (Aldosterone-synthesizing enzyme) (Steroid 18-hydroxylase) (P-450C18).	chr8 143988976
NM_000516	BC066923	GNAS complex locus (Fragment).	chr20 56900176
NM_000516	BC066923	GNAS complex locus.	chr20 56900176
NM_000516	NM_000516	Guanine nucleotide-binding protein G(s), alpha subunit (Adenylate cyclase-stimulating G alpha protein).	chr20 56900129
NM_000516	NM_080426	Mutant guanine nucleotide-binding protein G(S), alpha subunit.	chr20 56900129
NM_000531	NM_000531	Ornithine carbamoyltransferase, mitochondrial precursor (EC 2.1.3.3) (OTCase) (Ornithine transcarbamylase).	chrX 38096301
NM_000532	NM_000532	Propionyl-CoA carboxylase beta chain, mitochondrial precursor (EC 6.4.1.3) (PCCase beta subunit) (Propanoyl-CoA:carbon dioxide ligase beta subunit).	chr3 137451837
NM_000546	BC003596	Del133 p53 isoform.	chr17 7512464
NM_000546	DQ186648	Cellular tumor antigen p53 (Tumor suppressor p53) (Phosphoprotein p53) (Antigen NY-CO-13).	chr17 7512446
NM_000546	DQ186648	Del133 p53 beta isoform.	chr17 7512446
NM_000546	DQ186649	Cellular tumor antigen p53 (Tumor suppressor p53) (Phosphoprotein p53) (Antigen NY-CO-13).	chr17 7512446
NM_000546	DQ186649	Del133 p53 gamma isoform.	chr17 7512446
NM_000546	NM_000546	Cellular tumor antigen p53 (Tumor suppressor p53) (Phosphoprotein p53) (Antigen NY-CO-13).	chr17 7512464
NM_000633	NM_000633	Apoptosis regulator Bcl-2.	chr18 58941558
NM_000636	NM_000636	Superoxide dismutase [Mn], mitochondrial precursor (EC 1.15.1.1).	chr6 160022744
NM_000637	NM_000637	Glutathione reductase, mitochondrial precursor (EC 1.8.1.7) (GR) (GRase).	chr8 30655976
NM_000664	NM_000664	Acetyl-CoA carboxylase-alpha (EC 6.4.1.2) (Fragment).	chr17 32516040
NM_000664	NM_198834	Acetyl-CoA carboxylase 1 (EC 6.4.1.2) (ACC-alpha) [Includes: Biotin carboxylase (EC 6.3.4.14)].	chr17 32516040
NM_000664	NM_198835	Acetyl-CoA carboxylase-alpha (EC 6.4.1.2) (Fragment).	chr17 32516040
NM_000664	NM_198837	Acetyl-Coenzyme A carboxylase alpha isoform 2 variant (Fragment).	chr17 32516040
NM_000664	NM_198838	Acetyl-Coenzyme A carboxylase alpha isoform 2 variant (Fragment).	chr17 32516040
NM_000664	NM_198839	Acetyl-CoA carboxylase 1 (EC 6.4.1.2) (ACC-alpha) [Includes: Biotin carboxylase (EC 6.3.4.14)].	chr17 32516040
NM_000688	NM_000688	5-aminolevulinate synthase, nonspecific, mitochondrial precursor (EC 2.3.1.37) (5-aminolevulinic acid synthase) (Delta-aminolevulinate synthase) (Delta-ALA synthetase) (ALAS-H).	chr3 52207183
NM_000690	NM_000690	Aldehyde dehydrogenase, mitochondrial precursor (EC 1.2.1.3) (ALDH class 2) (ALDHI) (ALDH-E2).	chr12 110688728
NM_000692	NM_000692	Aldehyde dehydrogenase X, mitochondrial precursor (EC 1.2.1.3) (ALDH class 2).	chr9 38382701
NM_000693	BC009245	ALDH1A3 protein.	chr15 99237566
NM_000693	NM_000693	Aldehyde dehydrogenase 1A3 (EC 1.2.1.5) (Aldehyde dehydrogenase 6) (Retinaldehyde dehydrogenase 3) (RALDH-3).	chr15 99237583
NM_000696	NM_000696	4-trimethylaminobutyraldehyde dehydrogenase (EC 1.2.1.47) (TMABADH) (Aldehyde dehydrogenase 9A1) (EC 1.2.1.3) (Aldehyde dehydrogenase E3 isozyme) (Gamma-aminobutyraldehyde dehydrogenase) (EC 1.2.1.19) (R- aminobutyraldehyde dehydrogenase).	chr1 163898076
NM_000709	AB209828	2-oxoisovalerate dehydrogenase alpha subunit, mitochondrial precursor (EC 1.2.4.4) (Branched-chain alpha-keto acid dehydrogenase E1 component alpha chain) (BCKDH E1-alpha) (BCKDE1A).	chr19 46595572
NM_000709	NM_000709	2-oxoisovalerate dehydrogenase alpha subunit, mitochondrial precursor (EC 1.2.4.4) (Branched-chain alpha-keto acid dehydrogenase E1 component alpha chain) (BCKDH E1-alpha) (BCKDE1A).	chr19 46595543
NM_000714	NM_000714	Peripheral-type benzodiazepine receptor (PBR) (PKBS) (Mitochondrial benzodiazepine receptor).	chr22 41877478
NM_000714	NM_007311	Peripheral benzodiazepine receptor related protein.	chr22 41877478
NM_000718	M94173	Calcium channel alpha12.2 subunit (Fragment).	chr9 139892061
NM_000718	NM_000718	Voltage-dependent N-type calcium channel alpha-1B subunit (Voltage- gated calcium channel alpha subunit Cav2.2) (Calcium channel, L type, alpha-1 polypeptide isoform 5) (Brain calcium channel III) (BIII).	chr9 139892061
NM_000755	NM_000755	Carnitine O-acetyltransferase (EC 2.3.1.7) (Carnitine acetylase) (CAT) (Carnitine acetyltransferase) (CrAT).	chr9 130896895
NM_000755	NM_004003	n/a	chr9 130896895
NM_000755	NM_144782	Carnitine acetyltransferase.	chr9 130896895
NM_000781	NM_000781	Cytochrome P450 11A1, mitochondrial precursor (EC 1.14.15.6) (CYPXIA1) (P450(scc)) (Cholesterol side-chain cleavage enzyme) (Cholesterol desmolase).	chr15 72417156
NM_000782	NM_000782	Cytochrome P450 24A1, mitochondrial precursor (EC 1.14.-.-) (P450- CC24) (Vitamin D(3) 24-hydroxylase) (1,25-dihydroxyvitamin D(3) 24- hydroxylase) (24-OHase).	chr20 52203394
NM_000784	NM_000784	Cytochrome P450 27, mitochondrial precursor (EC 1.14.-.-) (Cytochrome P-450C27/25) (Sterol 26-hydroxylase) (Sterol 27-hydroxylase) (Vitamin D(3) 25-hydroxylase) (5-beta-cholestane-3-alpha,7-alpha,12-alpha-triol 27-hydroxylase).	chr2 219354948
NM_000785	BC001776	25-hydroxyvitamin D-1 alpha hydroxylase, mitochondrial precursor (EC 1.14.13.13) (Calcidiol 1-monooxygenase) (25-OHD-1 alpha- hydroxylase) (25-hydroxyvitamin D(3) 1-alpha-hydroxylase) (VD3 1A hydroxylase) (P450C1 alpha) (P450VD1-alpha).	chr12 56442384
NM_000785	NM_000785	25-hydroxyvitamin D-1 alpha hydroxylase, mitochondrial precursor (EC 1.14.13.13) (Calcidiol 1-monooxygenase) (25-OHD-1 alpha- hydroxylase) (25-hydroxyvitamin D(3) 1-alpha-hydroxylase) (VD3 1A hydroxylase) (P450C1 alpha) (P450VD1-alpha).	chr12 56442384
NM_000819	NM_000819	Trifunctional purine biosynthetic protein adenosine-3 [Includes: Phosphoribosylamine--glycine ligase (EC 6.3.4.13) (GARS) (Glycinamide ribonucleotide synthetase) (Phosphoribosylglycinamide synthetase); Phosphoribosylformylglycinamidine cyclo-ligase (EC 6.	chr21 33798143
NM_000862	NM_000862	3 beta-hydroxysteroid dehydrogenase/delta 5-->4-isomerase type I (3Beta-HSD I) (Trophoblast antigen FDO161G) [Includes: 3-beta-hydroxy- delta(5)-steroid dehydrogenase (EC 1.1.1.145) (3-beta-hydroxy-5-ene steroid dehydrogenase) (Progesterone reductase); St	chr1 119851373
NM_000898	NM_000898	Amine oxidase [flavin-containing] B (EC 1.4.3.4) (Monoamine oxidase type B) (MAO-B).	chrX 43510801
NM_000920	NM_000920	Pyruvate carboxylase, mitochondrial precursor (EC 6.4.1.1) (Pyruvic carboxylase) (PCB).	chr11 66372572
NM_000925	AL117618	n/a	chr3 58388397
NM_000925	NM_000925	Pyruvate dehydrogenase E1 component beta subunit, mitochondrial precursor (EC 1.2.4.1) (PDHE1-B).	chr3 58388397
NM_000928	BC005386	PLA2G1B protein.	chr12 119244302
NM_000928	NM_000928	Phospholipase A2 precursor (EC 3.1.1.4) (Phosphatidylcholine 2- acylhydrolase) (Group IB phospholipase A2).	chr12 119244296
NM_000967	AY320405	NPC-A-12.	chr22 38038837
NM_000967	BC036582	60S ribosomal protein L3 (HIV-1 TAR RNA binding protein B) (TARBP-B).	chr22 38038837
NM_000967	NM_000967	60S ribosomal protein L3 (HIV-1 TAR RNA binding protein B) (TARBP-B).	chr22 38038833
NM_000975	BC018970	Ribosomal protein L11 (Fragment).	chr1 23890893
NM_000975	NM_000975	60S ribosomal protein L11 (CLL-associated antigen KW-12).	chr1 23890880
NM_000976	BC059950	Hypothetical protein.	chr9 129249776
NM_000976	NM_000976	60S ribosomal protein L12.	chr9 129249775
NM_000978	BC034378	60S ribosomal protein L23 (Ribosomal protein L17).	chr17 34259877
NM_000978	NM_000978	60S ribosomal protein L23 (Ribosomal protein L17).	chr17 34259847
NM_001001290	NM_001001290	Hypothetical protein SLC2A9 (Fragment).	chr4 9436947
NM_001001290	NM_020041	Solute carrier family 2, facilitated glucose transporter member 9 (Glucose transporter type 9).	chr4 9436947
NM_001001336	AF169802	Cytochrome b5 reductase b5R.2.	chr11 7642911
NM_001001336	NM_001001336	Cytochrome b5 reductase b5R.2, isoform 2.	chr11 7642909
NM_001001336	NM_016229	Cytochrome b5 reductase b5R.2.	chr11 7642909
NM_001001503	BC021217	Hypothetical protein FLJ31479.	chr21 43186459
NM_001001503	NM_001001503	NADH-ubiquinone oxidoreductase 9 kDa subunit, mitochondrial precursor (EC 1.6.5.3) (EC 1.6.99.3) (Complex I-9KD) (CI-9KD).	chr21 43186446
NM_001001503	NM_021075	NADH-ubiquinone oxidoreductase flavoprotein 3, isoform a.	chr21 43186446
NM_001001563	NM_001001563	Import inner membrane translocase subunit TIM50, mitochondrial precursor.	chr19 44662891
NM_001001874	NM_001001874	Protein kinase NYD-SP25, isoform 2.	chr9 6318374
NM_001001874	NM_001001875	Protein kinase NYD-SP25, isoform 3.	chr9 6318374
NM_001001874	NM_033516	Protein kinase NYD-SP25, isoform 3.	chr9 6318374
NM_001001890	D43968	n/a	chr21 35081975
NM_001001890	D43969	n/a	chr21 35081975
NM_001001890	NM_001001890	Runt-related transcription factor 1 (Core-binding factor, alpha 2 subunit) (CBF-alpha 2) (Acute myeloid leukemia 1 protein) (Oncogene AML-1) (Polyomavirus enhancer binding protein 2 alpha B subunit) (PEBP2-alpha B) (PEA2-alpha B) (SL3-3 enhancer factor 1	chr21 35081968
NM_001001890	NM_001754	n/a	chr21 35081968
NM_001001937	NM_001001937	ATP synthase alpha chain, mitochondrial precursor (EC 3.6.3.14).	chr18 41918107
NM_001001977	NM_001001977	ATP synthase epsilon chain, mitochondrial (EC 3.6.3.14).	chr20 57037128
NM_001002000	NM_001002000	GMP reductase 2 (EC 1.7.1.7) (Guanosine 5'-monophosphate oxidoreductase 2) (Guanosine monophosphate reductase 2).	chr14 23771487
NM_001002031	BC020826	ATP synthase lipid-binding protein, mitochondrial precursor (EC 3.6.3.14) (ATP synthase proteolipid P2) (ATPase protein 9) (ATPase subunit C).	chr12 52345222
NM_001002031	NM_001002031	ATP synthase lipid-binding protein, mitochondrial precursor (EC 3.6.3.14) (ATP synthase proteolipid P2) (ATPase protein 9) (ATPase subunit C).	chr12 52345211
NM_001002031	NM_005176	ATP synthase lipid-binding protein, mitochondrial precursor (EC 3.6.3.14) (ATP synthase proteolipid P2) (ATPase protein 9) (ATPase subunit C).	chr12 52345211
NM_001002755	NM_001002755	HIRA-interacting protein 5.	chr2 69476758
NM_001002755	NM_015700	HIRA-interacting protein 5.	chr2 69476758
NM_001002758	AF517635	PTPN13-like protein, Y-linked (Testis-specific PTP-BL related Y protein).	chrY 22627290
NM_001002758	AF517635	PTPN13-like protein, Y-linked (Testis-specific PTP-BL related Y protein).	chrY 23045931
NM_001002758	NM_001002758	PTPN13-like protein, Y-linked (Testis-specific PTP-BL related Y protein).	chrY 22627290
NM_001002758	NM_001002758	PTPN13-like protein, Y-linked (Testis-specific PTP-BL related Y protein).	chrY 23045931
NM_001002913	NM_001002913	Chromosome 9 open reading frame 115.	chr9 129516048
NM_001002914	NM_001002914	Potassium channel tetramerization domain containing 11.	chr17 7196204
NM_001003713	AK123419	Hypothetical protein FLJ41425.	chr7 98893748
NM_001003713	NM_001003713	n/a	chr7 98893719
NM_001003713	NM_004889	ATP synthase f chain, mitochondrial (EC 3.6.3.14).	chr7 98893719
NM_001003785	NM_001003785	n/a	chr17 70546549
NM_001003785	NM_006356	ATP synthase D chain, mitochondrial (EC 3.6.3.14).	chr17 70546549
NM_001003803	NM_001003803	ATP synthase subunit s, mitochondrial precursor (ATP synthase coupling factor B) (Mitochondrial ATP synthase regulatory component factor B).	chr14 49848796
NM_001003803	NM_001003805	ATP synthase, H+ transporting, mitochondrial F0 complex, subunit s, isoform b.	chr14 49848796
NM_001003941	NM_001003941	Oxoglutarate (Alpha-ketoglutarate) dehydrogenase (Lipoamide), isoform 2 (Hypothetical protein H_DJ0691F11_gi16307008.sp_cds.1).	chr7 44612695
NM_001003941	NM_002541	2-oxoglutarate dehydrogenase E1 component, mitochondrial precursor (EC 1.2.4.2) (Alpha-ketoglutarate dehydrogenase).	chr7 44612695
NM_001004328	NM_001004328	Hypothetical protein FLJ16353.	chr12 8216416
NM_001005217	NM_001005217	FSHD region gene 2 protein.	chr4 191182518
NM_001005240	NM_001005240	Olfactory receptor 4F17.	chr19 61678
NM_001005353	NM_001005353	Adenylate kinase isoenzyme 4, mitochondrial (EC 2.7.4.3) (ATP-AMP transphosphorylase).	chr1 65386100
NM_001005369	NM_001005369	Translation initiation factor IF-2, mitochondrial precursor (IF-2Mt) (IF-2(Mt)).	chr2 55317261
NM_001005783	BC020863	Hydroxyacid oxidase 2 (Long chain).	chr1 119712954
NM_001005783	NM_001005783	Hydroxyacid oxidase 2 (EC 1.1.3.15) (HAOX2) ((S)-2-hydroxy-acid oxidase, peroxisomal) (Long chain alpha-hydroxy acid oxidase) (Long- chain L-2-hydroxy acid oxidase).	chr1 119712924
NM_001006114	NM_001006114	Chromosome 21 open reading frame 57, isoform 2.	chr21 46530694
NM_001006114	NM_058181	UPF0054 protein C21orf57.	chr21 46530694
NM_001006635	NM_001006635	Metaxin 2.	chr2 176842382
NM_001006635	NM_006554	Metaxin 2.	chr2 176842382
NM_001006641	NM_001006641	OTTHUMP00000022252 (Fragment).	chr9 129870299
NM_001007098	AB208789	Sterol carrier protein X, isoform 2.	chr1 53165536
NM_001007098	NM_001007098	Sterol carrier protein X, isoform 2.	chr1 53165535
NM_001007098	NM_002979	Nonspecific lipid-transfer protein, mitochondrial precursor (NSL-TP) (Sterol carrier protein 2) (SCP-2) (Sterol carrier protein X) (SCP-X) (SCPX).	chr1 53165535
NM_001007246	NM_001007246	Bromodomain and WD repeat domain containing 1, isoform C.	chr21 39590235
NM_001008539	NM_001008539	Low-affinity cationic amino acid transporter-2 (CAT-2) (CAT2).	chr8 17445205
NM_001008661	BC000819	KAT3 protein.	chr1 89174050
NM_001008661	NM_001008661	Novel protein.	chr1 89174043
NM_001008661	NM_001008662	Novel protein.	chr1 89174043
NM_001008726	NM_001008726	Hypothetical protein C14orf150 (Hypothetical protein FLJ38005) (Full- length cDNA clone CS0DM005YM15 of Fetal liver of Homo sapiens) (human) (MSTP050).	chr14 63133510
NM_001008800	AK126400	Chaperonin containing TCP1, subunit 3 (Gamma).	chr1 154545375
NM_001008800	BC008019	T-complex protein 1, gamma subunit (TCP-1-gamma) (CCT-gamma) (hTRiC5).	chr1 154545383
NM_001008800	NM_001008800	Chaperonin containing TCP1, subunit 3 (Gamma) (Fragment).	chr1 154545375
NM_001008800	NM_001008883	T-complex protein 1, gamma subunit (TCP-1-gamma) (CCT-gamma) (hTRiC5).	chr1 154545375
NM_001008800	NM_005998	T-complex protein 1, gamma subunit (TCP-1-gamma) (CCT-gamma) (hTRiC5).	chr1 154545375
NM_001009185	NM_001009185	ACSL6 protein.	chr5 131317050
NM_001009185	NM_015256	Long-chain-fatty-acid--CoA ligase 6 (EC 6.2.1.3) (Long-chain acyl-CoA synthetase 6) (LACS 6).	chr5 131317050
NM_001009814	NM_001009814	OTTHUMP00000018324 (Hypothetical protein KIAA0564).	chr13 41191474
NM_001009938	NM_001009938	Solute carrier family 25, member 26, isoform c.	chr3 66376316
NM_001009938	NM_173471	Solute carrier family 25, member 26.	chr3 66376316
NM_001010867	NM_001010867	Novel transcript.	chr1 226420138
NM_001011545	NM_001011545	Transcription factor BACH1t (Fragment).	chr21 29599430
NM_001011658	NM_001011658	Trafficking protein particle complex protein 2 (Sedlin) (MBP-1 interacting protein 2A) (MIP-2A).	chrX 13640281
NM_001012420	NM_001012420	Hypothetical protein DKFZp434P162 (Fragment).	chr15 26297404
NM_001012420	NM_001012420	Hypothetical protein DKFZp434P162 (Fragment).	chr15 26563797
NM_001012420	NM_001012420	Hypothetical protein DKFZp434P162 (Fragment).	chr15_random 258250
NM_001012957	NM_001012957	Disrupted in schizophrenia 1.	chr1 229829183
NM_001012957	NM_001012958	Disrupted in schizophrenia 1.	chr1 229829183
NM_001012957	NM_001012959	Disrupted in schizophrenia 1.	chr1 229829183
NM_001012957	NM_018662	Disrupted in schizophrenia 1 protein.	chr1 229829183
NM_001012985	BC064905	Novel protein.	chr1 232576069
NM_001012985	NM_001012985	Novel protein.	chr1 232576051
NM_001014763	AK128845	Hypothetical protein FLJ46464.	chr19 56540239
NM_001014763	NM_001014763	FP585.	chr19 56540220
NM_001014763	NM_001985	Electron transfer flavoprotein beta-subunit (Beta-ETF).	chr19 56540220
NM_001014811	NM_001014811	NADP-dependent malic enzyme, mitochondrial precursor (EC 1.1.1.40) (NADP-ME) (Malic enzyme 3).	chr11 85829799
NM_001014990	NM_001014990	Mitochondrial ribosomal protein L22 (Fragment).	chr5 154300838
NM_001014990	NM_014180	Mitochondrial ribosomal protein L22 (Fragment).	chr5 154300838
NM_001017	NM_001017	40S ribosomal protein S13.	chr11 17052515
NM_001017423	AK126355	Hypothetical protein FLJ44384.	chr10 97355691
NM_001017423	NM_001017423	Delta 1-pyrroline-5-carboxylate synthetase (P5CS) (Aldehyde dehydrogenase 18 family member A1) [Includes: Glutamate 5-kinase (EC 2.7.2.11) (Gamma-glutamyl kinase) (GK); Gamma-glutamyl phosphate reductase (GPR) (EC 1.2.1.41) (Glutamate-5-semialdehyde dehyd	chr10 97355676
NM_001017423	NM_002860	Delta 1-pyrroline-5-carboxylate synthetase (P5CS) (Aldehyde dehydrogenase 18 family member A1) [Includes: Glutamate 5-kinase (EC 2.7.2.11) (Gamma-glutamyl kinase) (GK); Gamma-glutamyl phosphate reductase (GPR) (EC 1.2.1.41) (Glutamate-5-semialdehyde dehyd	chr10 97355676
NM_001017434	NM_001017434	Hypothetical protein DKFZp686F06130 (PiggyBac transposable element derived 2).	chr1 247167064
NM_001017434	NM_170725	Hypothetical protein DKFZp686F06130 (PiggyBac transposable element derived 2).	chr1 247167064
NM_001020	BC071674	40S ribosomal protein S16.	chr19 44615691
NM_001020	NM_001020	40S ribosomal protein S16.	chr19 44615688
NM_001024668	AK127540	Cervical cancer 1 protooncogene protein p40.	chr12 49728387
NM_001024668	AK127540	Cervical cancer protooncogene-2 protein.	chr12 49728387
NM_001024668	BC064943	507e08.	chr12 49728402
NM_001024668	BC064943	LETMD1 protein.	chr12 49728402
NM_001024668	NM_001024668	LETMD1 protein.	chr12 49728350
NM_001024668	NM_001024670	Cervical cancer 1 protooncogene.	chr12 49728350
NM_001024668	NM_001024671	Hypothetical protein DKFZp586A011 (Fragment).	chr12 49728350
NM_001024668	NM_015416	Cervical cancer 1 protooncogene protein p40.	chr12 49728350
NM_001025	NM_001025	40S ribosomal protein S23.	chr5 81604896
NM_001031713	NM_001031713	Hypothetical protein C6orf79 (Chromosome 6 open reading frame 79).	chr6 13898999
NM_001031713	NM_022102	Hypothetical protein FLJ20958.	chr6 13898999
NM_001080	NM_001080	Succinate semialdehyde dehydrogenase, mitochondrial precursor (EC 1.2.1.24) (NAD(+)-dependent succinic semialdehyde dehydrogenase).	chr6 24603175
NM_001080	NM_170740	Succinate semialdehyde dehydrogenase, mitochondrial precursor (EC 1.2.1.24) (NAD(+)-dependent succinic semialdehyde dehydrogenase).	chr6 24603175
NM_001093	NM_001093	Acetyl-CoA carboxylase 2 (EC 6.4.1.2) (ACC-beta) [Includes: Biotin carboxylase (EC 6.3.4.14)].	chr12 108061593
NM_001096	BC006195	Hypothetical protein FLJ37765.	chr17 37276706
NM_001096	NM_001096	ATP-citrate synthase (EC 2.3.3.8) (ATP-citrate (pro-S-)-lyase) (Citrate cleavage enzyme).	chr17 37276706
NM_001096	NM_198830	ATP-citrate synthase (EC 2.3.3.8) (ATP-citrate (pro-S-)-lyase) (Citrate cleavage enzyme).	chr17 37276706
NM_001098	CR595461	Aconitate hydratase, mitochondrial precursor (EC 4.2.1.3) (Citrate hydro-lyase) (Aconitase).	chr22 40195079
NM_001098	NM_001098	Aconitate hydratase, mitochondrial precursor (EC 4.2.1.3) (Citrate hydro-lyase) (Aconitase).	chr22 40195074
NM_001151	NM_001151	ADP/ATP translocase 1 (Adenine nucleotide translocator 1) (ANT 1) (ADP,ATP carrier protein 1) (Solute carrier family 25 member 4) (ADP,ATP carrier protein, heart/skeletal muscle isoform T1).	chr4 186301391
NM_001152	NM_001152	ADP/ATP translocase 2 (Adenine nucleotide translocator 2) (ANT 2) (ADP,ATP carrier protein 2) (Solute carrier family 25 member 5) (ADP,ATP carrier protein, fibroblast isoform).	chrX 118486436
NM_001172	NM_001172	Arginase-2, mitochondrial precursor (EC 3.5.3.1) (Arginase II) (Non- hepatic arginase) (Kidney-type arginase).	chr14 67156331
NM_001190	NM_001190	Branched-chain-amino-acid aminotransferase, mitochondrial precursor (EC 2.6.1.42) (BCAT(m)) (Placental protein 18) (PP18).	chr19 53990131
NM_001191	NM_001191	OTTHUMP00000030558 (Fragment).	chr20 29715923
NM_001191	NM_138578	Apoptosis regulator Bcl-X (Bcl-2-like 1 protein).	chr20 29715923
NM_001196	NM_001196	BH3 interacting domain death agonist (BID).	chr22 16596905
NM_001196	NM_197966	BH3 interacting domain death agonist (BID).	chr22 16596905
NM_001212	NM_001212	Complement component 1, Q subcomponent binding protein, mitochondrial precursor (Glycoprotein gC1qBP) (GC1q-R protein) (Hyaluronan-binding protein 1) (p32) (p33).	chr17 5276822
NM_001228	NM_001228	Hypothetical protein CASP8.	chr2 201806425
NM_001231	BC022289	Calsequestrin 1 (Fast-twitch, skeletal muscle).	chr1 158427022
NM_001231	NM_001231	Calsequestrin-1 precursor (Calsequestrin, skeletal muscle isoform) (Calmitin).	chr1 158427019
NM_001303	NM_001303	Protoheme IX farnesyltransferase, mitochondrial precursor (EC 2.5.1.-) (Heme O synthase).	chr17 13913443
NM_001349	NM_001349	Aspartyl-tRNA synthetase (EC 6.1.1.12) (Aspartate--tRNA ligase) (AspRS).	chr2 136380723
NM_001359	NM_001359	2,4-dienoyl-CoA reductase, mitochondrial precursor (EC 1.3.1.34) (2,4- dienoyl-CoA reductase [NADPH]) (4-enoyl-CoA reductase [NADPH]).	chr8 91082755
NM_001361	NM_001361	Dihydroorotate dehydrogenase, mitochondrial precursor (EC 1.3.3.1) (Dihydroorotate oxidase) (DHOdehase).	chr16 70600143
NM_001388	NM_001388	Developmentally regulated GTP-binding protein 2 (DRG 2).	chr17 17932007
NM_001398	AK126566	Hypothetical protein FLJ44603.	chr19 43997903
NM_001398	NM_001398	Delta3,5-delta2,4-dienoyl-CoA isomerase, mitochondrial precursor (EC 5.3.3.-).	chr19 43997903
NM_001482	NM_001482	Glycine amidinotransferase, mitochondrial precursor (EC 2.1.4.1) (L- arginine:glycine amidinotransferase) (Transamidinase) (AT).	chr15 43440615
NM_001483	NM_001483	Protein NipSnap2 (Glioblastoma amplified sequence).	chr7 55999789
NM_001517	AB209479	Hypothetical protein FLJ21965.	chr6_qbl_hap2 2122950
NM_001517	NM_001517	TFIIH basal transcription factor complex p52 subunit (Basic transcription factor 52 kDa subunit) (BTF2-p52) (General transcription factor IIH polypeptide 4).	chr6 30983955
NM_001517	NM_001517	TFIIH basal transcription factor complex p52 subunit (Basic transcription factor 52 kDa subunit) (BTF2-p52) (General transcription factor IIH polypeptide 4).	chr6_cox_hap1 2324558
NM_001517	NM_001517	TFIIH basal transcription factor complex p52 subunit (Basic transcription factor 52 kDa subunit) (BTF2-p52) (General transcription factor IIH polypeptide 4).	chr6_qbl_hap2 2122908
NM_001540	NM_001540	Heat-shock protein beta-1 (HspB1) (Heat shock 27 kDa protein) (HSP 27) (Stress-responsive protein 27) (SRP27) (Estrogen-regulated 24 kDa protein) (28 kDa heat shock protein).	chr7 75769858
NM_001545	NM_001545	Immature colon carcinoma transcript 1 protein precursor (Digestion substraction 1) (DS-1).	chr17 70520374
NM_001605	NM_001605	Alanyl-tRNA synthetase (EC 6.1.1.7) (Alanine--tRNA ligase) (AlaRS).	chr16 68843797
NM_001607	BC014474	ACAA1 protein.	chr3 38139209
NM_001607	NM_001607	3-ketoacyl-CoA thiolase, peroxisomal precursor (EC 2.3.1.16) (Beta- ketothiolase) (Acetyl-CoA acyltransferase) (Peroxisomal 3-oxoacyl-CoA thiolase).	chr3 38139210
NM_001608	NM_001608	Acyl-CoA dehydrogenase, long-chain specific, mitochondrial precursor (EC 1.3.99.13) (LCAD).	chr2 210760962
NM_001609	NM_001609	Acyl-CoA dehydrogenase, short/branched chain specific, mitochondrial precursor (EC 1.3.99.-) (SBCAD) (2-methyl branched chain acyl-CoA dehydrogenase) (2-MEBCAD) (2-methylbutyryl-coenzyme A dehydrogenase) (2-methylbutyryl-CoA dehydrogenase).	chr10 124758523
NM_001625	NM_001625	Adenylate kinase isoenzyme 2, mitochondrial (EC 2.7.4.3) (ATP-AMP transphosphorylase).	chr1 33251169
NM_001686	NM_001686	ATP synthase beta chain, mitochondrial precursor (EC 3.6.3.14).	chr12 55318225
NM_001688	NM_001002015	ATP synthase, H+ transporting, mitochondrial F0 complex, subunit b, isoform 1.	chr1 111793288
NM_001688	NM_001688	ATP synthase B chain, mitochondrial precursor (EC 3.6.3.14).	chr1 111793265
NM_001697	NM_001697	ATP synthase O subunit, mitochondrial precursor (EC 3.6.3.14) (Oligomycin sensitivity conferral protein) (OSCP).	chr21 34197627
NM_001698	BC020722	AU RNA binding protein/enoyl-Coenzyme A hydratase.	chr9 93015936
NM_001698	NM_001698	Methylglutaconyl-CoA hydratase, mitochondrial precursor (EC 4.2.1.18) (AU-specific RNA-binding enoyl-CoA hydratase) (AU-binding protein/enoyl-CoA hydratase).	chr9 93015928
NM_001739	NM_001739	Carbonic anhydrase 5A, mitochondrial precursor (EC 4.2.1.1) (Carbonic anhydrase VA) (Carbonate dehydratase VA) (CA-VA).	chr16 86479125
NM_001752	NM_001752	Catalase (EC 1.11.1.6).	chr11 34417053
NM_001762	AB063318	Acute morphine dependence related peptide 3.	chr7 56086900
NM_001762	NM_001762	T-complex protein 1, zeta subunit (TCP-1-zeta) (CCT-zeta) (CCT-zeta-1) (Tcp20) (HTR3) (Acute morphine dependence related protein 2).	chr7 56086871
NM_001825	NM_001825	Creatine kinase, sarcomeric mitochondrial precursor (EC 2.7.3.2) (S- MtCK) (Mib-CK) (Basic-type mitochondrial creatine kinase).	chr5 80564937
NM_001861	BC047869	COX4I1 protein.	chr16 84390728
NM_001861	NM_001861	Cytochrome c oxidase subunit IV isoform 1, mitochondrial precursor (EC 1.9.3.1) (COX IV-1) (Cytochrome c oxidase polypeptide IV).	chr16 84390696
NM_001862	NM_001862	Cytochrome c oxidase polypeptide Vb, mitochondrial precursor (EC 1.9.3.1).	chr2 97628952
NM_001863	NM_001863	Cytochrome c oxidase subunit VIb isoform 1 (EC 1.9.3.1) (COX VIb-1).	chr19 40830994
NM_001864	NM_001864	Cytochrome c oxidase polypeptide VIIa-heart, mitochondrial precursor (EC 1.9.3.1) (Cytochrome c oxidase subunit VIIa-H) (COX VIIa-M).	chr19 41333663
NM_001865	NM_001865	Cytochrome c oxidase polypeptide VIIa-liver/heart, mitochondrial precursor (EC 1.9.3.1) (Cytochrome c oxidase subunit VIIa-L) (VIIaL).	chr6 76004222
NM_001866	NM_001866	Cytochrome c oxidase polypeptide VIIb, mitochondrial precursor (EC 1.9.3.1).	chrX 77041616
NM_001867	NM_001867	Cytochrome c oxidase polypeptide VIIc, mitochondrial precursor (EC 1.9.3.1).	chr5 85949539
NM_001875	AF154830	n/a	chr2 211129582
NM_001875	BC058010	CPS1 protein.	chr2 211129570
NM_001875	NM_001875	Carbamoyl-phosphate synthase [ammonia], mitochondrial precursor (EC 6.3.4.16) (Carbamoyl-phosphate synthetase I) (CPSase I).	chr2 211129582
NM_001916	NM_001916	Cytochrome c1, heme protein, mitochondrial precursor (Cytochrome c-1).	chr8 145221986
NM_001919	BC000762	DCI protein.	chr16 2229898
NM_001919	BC002746	Delta 3, delta 2-enoyl-CoA isomerase (Fragments).	chr16 2229898
NM_001919	NM_001919	3,2-trans-enoyl-CoA isomerase, mitochondrial precursor (EC 5.3.3.8) (Dodecenoyl-CoA isomerase) (Delta(3),delta(2)-enoyl-CoA isomerase) (D3,D2-enoyl-CoA isomerase).	chr16 2229898
NM_001931	NM_001931	Dihydrolipoyllysine-residue acetyltransferase component of pyruvate dehydrogenase complex, mitochondrial precursor (EC 2.3.1.12) (Pyruvate dehydrogenase complex E2 subunit) (PDCE2) (E2) (Dihydrolipoamide S- acetyltransferase component of pyruvate dehydrog	chr11 111401387
NM_001941	NM_001941	Desmocollin-3 precursor (Desmocollin-4) (HT-CP).	chr18 26825028
NM_001941	NM_024423	Desmocollin-3 precursor (Desmocollin-4) (HT-CP).	chr18 26825028
NM_001953	NM_001953	Thymidine phosphorylase precursor (EC 2.4.2.4) (TdRPase) (TP) (Platelet-derived endothelial cell growth factor) (PD-ECGF) (Gliostatin).	chr22 49311049
NM_001995	NM_001995	Long-chain-fatty-acid--CoA ligase 1 (EC 6.2.1.3) (Long-chain acyl-CoA synthetase 1) (LACS 1) (Palmitoyl-CoA ligase 1) (Long-chain fatty acid CoA ligase 2) (Long-chain acyl-CoA synthetase 2) (LACS 2) (Acyl-CoA synthetase 1) (ACS1) (Palmitoyl-CoA ligase 2).	chr4 185913743
NM_002047	NM_002047	Glycyl-tRNA synthetase (EC 6.1.1.14) (Glycine--tRNA ligase) (GlyRS).	chr7 30600705
NM_002079	NM_002079	Aspartate aminotransferase, cytoplasmic (EC 2.6.1.1) (Transaminase A) (Glutamate oxaloacetate transaminase 1).	chr10 101146617
NM_002080	NM_002080	Aspartate aminotransferase, mitochondrial precursor (EC 2.6.1.1) (Transaminase A) (Glutamate oxaloacetate transaminase 2).	chr16 57298535
NM_002092	NM_002092	G-rich sequence factor 1 (GRSF-1).	chr4 71903957
NM_002130	AK095492	Hypothetical protein FLJ38173.	chr5 43325254
NM_002130	NM_002130	Hydroxymethylglutaryl-CoA synthase, cytoplasmic (EC 2.3.3.10) (HMG-CoA synthase) (3-hydroxy-3-methylglutaryl coenzyme A synthase).	chr5 43325254
NM_002156	NM_002156	60 kDa heat shock protein, mitochondrial precursor (Hsp60) (60 kDa chaperonin) (CPN60) (Heat shock protein 60) (HSP-60) (Mitochondrial matrix protein P1) (P60 lymphocyte protein) (HuCHA60).	chr2 198059554
NM_002157	NM_002157	10 kDa heat shock protein, mitochondrial (Hsp10) (10 kDa chaperonin) (CPN10) (Early-pregnancy factor) (EPF).	chr2 198073364
NM_002168	NM_002168	Isocitrate dehydrogenase [NADP], mitochondrial precursor (EC 1.1.1.42) (Oxalosuccinate decarboxylase) (IDH) (NADP(+)-specific ICDH) (IDP) (ICD-M).	chr15 88428217
NM_002225	NM_002225	Isovaleryl-CoA dehydrogenase, mitochondrial precursor (EC 1.3.99.10) (IVD).	chr15 38484977
NM_002234	NM_002234	Potassium voltage-gated channel subfamily A member 5 (Voltage-gated potassium channel subunit Kv1.5) (HK2) (HPCN1).	chr12 5023345
NM_002378	NM_002378	Hypothetical protein DKFZp434N1212.	chr19 3728967
NM_002378	NM_139354	Hypothetical protein DKFZp434N1212.	chr19 3728967
NM_002378	NM_139355	Megakaryocyte-associated tyrosine-protein kinase (EC 2.7.1.112) (Tyrosine-protein kinase CTK) (Protein kinase HYL) (Hematopoietic consensus tyrosine-lacking kinase).	chr19 3728967
NM_002395	NM_002395	NADP-dependent malic enzyme (EC 1.1.1.40) (NADP-ME) (Malic enzyme 1).	chr6 83977975
NM_002396	NM_002396	NAD-dependent malic enzyme, mitochondrial precursor (EC 1.1.1.38) (NAD-ME) (Malic enzyme 2).	chr18 46659432
NM_002437	NM_002437	Mpv17 protein.	chr2 27385864
NM_002454	NM_002454	MTRR protein (Fragment).	chr5 7922274
NM_002455	NM_002455	Metaxin 1.	chr1 153445113
NM_002455	NM_198883	Metaxin 1.	chr1 153445113
NM_002488	NM_002488	NADH-ubiquinone oxidoreductase B8 subunit (EC 1.6.5.3) (EC 1.6.99.3) (Complex I-B8) (CI-B8).	chr5 140005142
NM_002489	NM_002489	NADH-ubiquinone oxidoreductase MLRQ subunit (EC 1.6.5.3) (EC 1.6.99.3) (Complex I-MLRQ) (CI-MLRQ).	chr7 10939339
NM_002490	BC002772	NADH-ubiquinone oxidoreductase B14 subunit (EC 1.6.5.3) (EC 1.6.99.3) (Complex I-B14) (CI-B14).	chr22 40811476
NM_002490	NM_002490	NADH-ubiquinone oxidoreductase B14 subunit (EC 1.6.5.3) (EC 1.6.99.3) (Complex I-B14) (CI-B14).	chr22 40811476
NM_002491	NM_002491	NADH-ubiquinone oxidoreductase B12 subunit (EC 1.6.5.3) (EC 1.6.99.3) (Complex I-B12) (CI-B12).	chr2 201644778
NM_002492	BC093071	NDUFB5 protein.	chr3 180805291
NM_002492	NM_002492	NADH-ubiquinone oxidoreductase SGDH subunit, mitochondrial precursor (EC 1.6.5.3) (EC 1.6.99.3) (Complex I-SGDH) (CI-SGDH).	chr3 180805268
NM_002493	NM_002493	NADH-ubiquinone oxidoreductase B17 subunit (EC 1.6.5.3) (EC 1.6.99.3) (Complex I-B17) (CI-B17).	chr9 32543522
NM_002493	NM_182739	NADH dehydrogenase (Ubiquinone) 1 beta subcomplex, 6, 17kDa.	chr9 32543522
NM_002494	NM_002494	NADH-ubiquinone oxidoreductase KFYI subunit, mitochondrial precursor (EC 1.6.5.3) (EC 1.6.99.3) (Complex I-KFYI) (CI-KFYI).	chr4 140430541
NM_002495	NM_002495	NADH-ubiquinone oxidoreductase 18 kDa subunit, mitochondrial precursor (EC 1.6.5.3) (EC 1.6.99.3) (Complex I-18 kDa) (CI-18 kDa) (Complex I- AQDQ) (CI-AQDQ).	chr5 52892241
NM_002496	NM_002496	NADH-ubiquinone oxidoreductase 23 kDa subunit, mitochondrial precursor (EC 1.6.5.3) (EC 1.6.99.3) (Complex I-23KD) (CI-23KD) (TYKY subunit).	chr11 67554684
NM_002525	AY360265	Nardilysin isoform.	chr1 52027470
NM_002525	BC008775	Nardilysin precursor (EC 3.4.24.61) (N-arginine dibasic convertase) (NRD convertase) (NRD-C).	chr1 52027470
NM_002525	NM_002525	Nardilysin precursor (EC 3.4.24.61) (N-arginine dibasic convertase) (NRD convertase) (NRD-C).	chr1 52027470
NM_002525	X93207	Nardilysin isoform.	chr1 52027470
NM_002525	X93207	Nardilysin precursor (EC 3.4.24.61) (N-arginine dibasic convertase) (NRD convertase) (NRD-C).	chr1 52027470
NM_002528	NM_002528	Endonuclease III-like protein 1 (EC 4.2.99.18).	chr16 2029816
NM_002542	NM_002542	N-glycosylase/DNA lyase [Includes: 8-oxoguanine DNA glycosylase (EC 3.2.2.-); DNA-(apurinic or apyrimidinic site) lyase (EC 4.2.99.18) (AP lyase)].	chr3 9765704
NM_002542	NM_016819	N-glycosylase/DNA lyase [Includes: 8-oxoguanine DNA glycosylase (EC 3.2.2.-); DNA-(apurinic or apyrimidinic site) lyase (EC 4.2.99.18) (AP lyase)].	chr3 9765704
NM_002542	NM_016820	N-glycosylase/DNA lyase [Includes: 8-oxoguanine DNA glycosylase (EC 3.2.2.-); DNA-(apurinic or apyrimidinic site) lyase (EC 4.2.99.18) (AP lyase)].	chr3 9765704
NM_002574	NM_002574	Peroxiredoxin 1 (EC 1.11.1.15) (Thioredoxin peroxidase 2) (Thioredoxin-dependent peroxide reductase 2) (Proliferation-associated protein PAG) (Natural killer cell-enhancing factor A) (NKEF-A).	chr1 45749294
NM_002610	NM_002610	[Pyruvate dehydrogenase [lipoamide]] kinase isozyme 1, mitochondrial precursor (EC 2.7.1.99) (Pyruvate dehydrogenase kinase isoform 1).	chr2 173129024
NM_002611	NM_002611	[Pyruvate dehydrogenase [lipoamide]] kinase isozyme 2, mitochondrial precursor (EC 2.7.1.99) (Pyruvate dehydrogenase kinase isoform 2).	chr17 45527694
NM_002612	NM_002612	[Pyruvate dehydrogenase [lipoamide]] kinase isozyme 4, mitochondrial precursor (EC 2.7.1.99) (Pyruvate dehydrogenase kinase isoform 4).	chr7 95050748
NM_002634	NM_002634	Prohibitin.	chr17 44836418
NM_002693	NM_002693	DNA polymerase gamma subunit 1 (EC 2.7.7.7) (Mitochondrial DNA polymerase catalytic subunit) (PolG-alpha).	chr15 87660562
NM_002723	NM_002723	Basic salivary proline-rich protein 4 allele S precursor (Salivary proline-rich protein Po) (Parotid o protein) [Contains: Protein N1; Glycosylated protein A].	chr12 11351283
NM_002752	NM_002752	Mitogen-activated protein kinase 9 (EC 2.7.1.37) (Stress-activated protein kinase JNK2) (c-Jun N-terminal kinase 2) (JNK-55).	chr5 179595389
NM_002752	NM_139068	Mitogen-activated protein kinase 9 (EC 2.7.1.37) (Stress-activated protein kinase JNK2) (c-Jun N-terminal kinase 2) (JNK-55).	chr5 179595389
NM_002752	NM_139069	n/a	chr5 179595389
NM_002752	NM_139070	n/a	chr5 179595389
NM_002778	BC091483	PSAP protein.	chr10 73246061
NM_002778	M60258	Proactivator polypeptide precursor [Contains: Saposin A (Protein A); Saposin B-Val; Saposin B (Sphingolipid activator protein 1) (SAP-1) (Cerebroside sulfate activator) (CSAct) (Dispersin) (Sulfatide/GM1 activator); Saposin C (Co-beta-glucosidase) (A1 act	chr10 73246061
NM_002778	NM_002778	Proactivator polypeptide precursor [Contains: Saposin A (Protein A); Saposin B-Val; Saposin B (Sphingolipid activator protein 1) (SAP-1) (Cerebroside sulfate activator) (CSAct) (Dispersin) (Sulfatide/GM1 activator); Saposin C (Co-beta-glucosidase) (A1 act	chr10 73246063
NM_002858	BC009712	ABCD3 protein (ATP-binding cassette, sub-family D (ALD), member 3).	chr1 94656594
NM_002858	BC068509	ABCD3 protein.	chr1 94656559
NM_002858	NM_002858	ATP-binding cassette sub-family D member 3 (70 kDa peroxisomal membrane protein) (PMP70).	chr1 94656598
NM_002880	NM_002880	RAF proto-oncogene serine/threonine-protein kinase (EC 2.7.1.37) (Raf- 1) (C-RAF) (cRaf).	chr3 12600107
NM_002940	NM_002940	ATP-binding cassette sub-family E member 1 (RNase L inhibitor) (Ribonuclease 4 inhibitor) (RNS4I) (2'-5' oligoadenylate-binding protein) (HuHP68).	chr4 146238940
NM_002949	NM_002949	39S ribosomal protein L12, mitochondrial precursor (L12mt) (MRP-L12) (5c5-2).	chr17 77280811
NM_003000	NM_003000	Succinate dehydrogenase [ubiquinone] iron-sulfur protein, mitochondrial precursor (EC 1.3.5.1) (Ip) (Iron-sulfur subunit of complex II).	chr1 17217840
NM_003018	NM_003018	Pulmonary surfactant-associated protein C precursor (SP-C) (SP5) (Pulmonary surfactant-associated proteolipid SPL(Val)).	chr8 22075112
NM_003021	NM_003021	Small glutamine-rich tetratricopeptide repeat-containing protein A (Vpu-binding protein) (UBP).	chr19 2705711
NM_003029	BC033925	SHC (Src homology 2 domain containing) transforming protein 1 (Fragment).	chr1 153201398
NM_003029	BX647149	SHC transforming protein 1 (SH2 domain protein C1) (Src homology 2 domain containing transforming protein C1).	chr1 153201398
NM_003029	NM_003029	SHC (Src homology 2 domain containing) transforming protein 1 (Fragment).	chr1 153201398
NM_003029	U73377	SHC (Src homology 2 domain containing) transforming protein 1.	chr1 153201397
NM_003045	NM_003045	High-affinity cationic amino acid transporter-1 (CAT-1) (CAT1) (System Y+ basic amino acid transporter) (Ecotropic retroviral leukemia receptor homolog) (ERR) (Ecotropic retrovirus receptor homolog).	chr13 28981551
NM_003119	NM_003119	Paraplegin (EC 3.4.24.-) (Spastic paraplegia protein 7).	chr16 88102305
NM_003143	BC093054	Single-stranded DNA binding protein 1.	chr7 141084627
NM_003143	NM_003143	Single-stranded DNA-binding protein, mitochondrial precursor (Mt-SSB) (MtSSB) (PWP1-interacting protein 17).	chr7 141084644
NM_003156	NM_003156	Stromal interaction molecule 1 precursor.	chr11 3833508
NM_003171	NM_003171	Suppressor of var1, 3-like 1 (S. cerevisiae)(SUV3) (Fragment).	chr10 70609998
NM_003172	NM_003172	Surfeit locus protein 1.	chr9 135208486
NM_003201	NM_003201	Transcription factor A, mitochondrial precursor (mtTFA) (Mitochondrial transcription factor 1) (MtTF1) (Transcription factor 6-like 2).	chr10 59815181
NM_003258	CR615052	Thymidine kinase, cytosolic (EC 2.7.1.21).	chr17 73681796
NM_003258	NM_003258	Thymidine kinase, cytosolic (EC 2.7.1.21).	chr17 73681775
NM_003312	NM_003312	Thiosulfate sulfurtransferase (EC 2.8.1.1) (Rhodanese).	chr22 35736852
NM_003321	BC001633	Elongation factor Tu, mitochondrial precursor (EF-Tu) (P43).	chr16 28761609
NM_003321	NM_003321	Elongation factor Tu, mitochondrial precursor (EF-Tu) (P43).	chr16 28761612
NM_003321	S75463	Elongation factor Tu, mitochondrial precursor (EF-Tu) (P43).	chr16 28761609
NM_003355	NM_003355	Mitochondrial uncoupling protein 2 (UCP 2) (UCPH).	chr11 73363363
NM_003356	NM_003356	Mitochondrial uncoupling protein 3 (UCP 3).	chr11 73388984
NM_003362	NM_003362	Hypothetical protein DKFZp781L1143.	chr12 108020389
NM_003365	CR618343	Ubiquinol-cytochrome-c reductase complex core protein I, mitochondrial precursor (EC 1.10.2.2).	chr3 48611443
NM_003365	NM_003365	Ubiquinol-cytochrome-c reductase complex core protein I, mitochondrial precursor (EC 1.10.2.2).	chr3 48611435
NM_003366	NM_003366	Ubiquinol-cytochrome-c reductase complex core protein 2, mitochondrial precursor (EC 1.10.2.2) (Complex III subunit II).	chr16 21872109
NM_003374	NM_003374	Voltage-dependent anion-selective channel protein 1 (VDAC-1) (hVDAC1) (Outer mitochondrial membrane protein porin 1) (Plasmalemmal porin) (Porin 31HL) (Porin 31HM).	chr5 133335505
NM_003375	BC000165	VDAC2 protein.	chr10 76640568
NM_003375	L08666	Voltage-dependent anion channel 2.	chr10 76640611
NM_003375	NM_003375	Voltage-dependent anion-selective channel protein 2 (VDAC-2) (hVDAC2) (Outer mitochondrial membrane protein porin 2).	chr10 76640568
NM_003477	NM_003477	Pyruvate dehydrogenase protein X component, mitochondrial precursor (Dihydrolipoamide dehydrogenase-binding protein of pyruvate dehydrogenase complex) (Lipoyl-containing pyruvate dehydrogenase complex component X) (E3-binding protein) (E3BP) (proX).	chr11 34894740
NM_003486	NM_003486	Large neutral amino acids transporter small subunit 1 (L-type amino acid transporter 1) (4F2 light chain) (4F2 LC) (4F2LC) (CD98 light chain) (Integral membrane protein E16) (hLAT1).	chr16 86421130
NM_003488	NM_003488	A kinase anchor protein 1, mitochondrial precursor (Protein kinase A anchoring protein 1) (PRKA1) (A-kinase anchor protein 149 kDa) (AKAP 149) (Dual specificity A-kinase anchoring protein 1) (D-AKAP-1) (Spermatid A-kinase anchor protein 84) (S-AKAP84).	chr17 52517619
NM_003562	NM_003562	Mitochondrial 2-oxoglutarate/malate carrier protein (OGCP) (Solute carrier family 25 member 11).	chr17 4781348
NM_003634	NM_003634	Protein NipSnap1.	chr22 28280799
NM_003705	NM_003705	Calcium-binding mitochondrial carrier protein Aralar1 (Mitochondrial aspartate glutamate carrier 1) (Solute carrier family 25 member 12).	chr2 172349126
NM_003748	NM_003748	Delta-1-pyrroline-5-carboxylate dehydrogenase, mitochondrial precursor (EC 1.5.1.12) (P5C dehydrogenase) (Aldehyde dehydrogenase 4A1).	chr1 19070512
NM_003776	NM_003776	39S ribosomal protein L40, mitochondrial precursor (L40mt) (MRP-40) (Nuclear localization signal containing protein deleted in velocardiofacial syndrome) (Up-regulated in metastasis).	chr22 17800035
NM_003818	NM_003818	Phosphatidate cytidylyltransferase 2 (EC 2.7.7.41) (CDP-diglyceride synthetase 2) (CDP-diglyceride pyrophosphorylase 2) (CDP- diacylglycerol synthase 2) (CDS 2) (CTP:phosphatidate cytidylyltransferase 2) (CDP-DAG synthase 2) (CDP-DG synthetase 2).	chr20 5055481
NM_003848	BC068602	Succinyl-CoA ligase [GDP-forming] beta-chain, mitochondrial precursor (EC 6.2.1.4) (Succinyl-CoA synthetase, betaG chain) (SCS-betaG) (GTP- specific succinyl-CoA synthetase beta subunit).	chr3 67507835
NM_003848	NM_003848	Succinyl-CoA ligase [GDP-forming] beta-chain, mitochondrial precursor (EC 6.2.1.4) (Succinyl-CoA synthetase, betaG chain) (SCS-betaG) (GTP- specific succinyl-CoA synthetase beta subunit).	chr3 67507835
NM_003849	NM_003849	Succinyl-CoA ligase [GDP-forming] alpha-chain, mitochondrial precursor (EC 6.2.1.4) (Succinyl-CoA synthetase, alpha chain) (SCS-alpha).	chr2 84504186
NM_003850	AK001458	Hypothetical protein DKFZp564P2062 (Fragment).	chr13 47414792
NM_003850	NM_003850	Succinyl-CoA ligase [ADP-forming] beta-chain, mitochondrial precursor (EC 6.2.1.5) (Succinyl-CoA synthetase, betaA chain) (SCS-betaA) (ATP- specific succinyl-CoA synthetase beta subunit).	chr13 47414792
NM_003875	NM_003875	GMP synthase [glutamine-hydrolyzing] (EC 6.3.5.2) (Glutamine amidotransferase) (GMP synthetase).	chr3 157071018
NM_003951	NM_003951	Brain mitochondrial carrier protein 1 (BMCP-1) (Mitochondrial uncoupling protein 5) (UCP 5) (Solute carrier family 25 member 14).	chrX 129301727
NM_003951	NM_022810	Brain mitochondrial carrier protein 1 (BMCP-1) (Mitochondrial uncoupling protein 5) (UCP 5) (Solute carrier family 25 member 14).	chrX 129301727
NM_003984	NM_003984	Solute carrier family 13 member 2 (Renal sodium/dicarboxylate cotransporter) (Na(+)/dicarboxylate cotransporter 1) (NaDC-1).	chr17 23824790
NM_004044	NM_004044	Bifunctional purine biosynthesis protein PURH [Includes: Phosphoribosylaminoimidazolecarboxamide formyltransferase (EC 2.1.2.3) (AICAR transformylase); IMP cyclohydrolase (EC 3.5.4.10) (Inosinicase) (IMP synthetase) (ATIC)].	chr2 215885080
NM_004052	NM_004052	BCL2/adenovirus E1B 19-kDa protein-interacting protein 3.	chr10 133631193
NM_004059	NM_004059	Cysteine conjugate-beta lyase; cytoplasmic (Glutamine transaminase K, kyneurenine aminotransferase) (Fragment).	chr9 130635043
NM_004074	NM_004074	Cytochrome c oxidase polypeptide VIII-liver/heart, mitochondrial precursor (EC 1.9.3.1) (Cytochrome c oxidase subunit 8-2).	chr11 63498654
NM_004075	NM_004075	Photolyase (Cryptochrome 1).	chr12 105909271
NM_004077	NM_004077	Citrate synthase, mitochondrial precursor (EC 2.3.3.1).	chr12 54951749
NM_004077	NM_198324	Citrate synthase, mitochondrial precursor (EC 2.3.3.1).	chr12 54951749
NM_004085	NM_004085	Mitochondrial import inner membrane translocase subunit TIM8 A (Deafness dystonia protein 1) (X-linked deafness dystonia protein).	chrX 100487305
NM_004092	NM_004092	Enoyl-CoA hydratase, mitochondrial precursor (EC 4.2.1.17) (Short chain enoyl-CoA hydratase) (SCEH) (Enoyl-CoA hydratase 1).	chr10 135025979
NM_004099	NM_004099	Erythrocyte band 7 integral membrane protein (Stomatin) (Protein 7.2b).	chr9 123141174
NM_004099	NM_198194	Stomatin.	chr9 123141177
NM_004104	NM_004104	Fatty acid synthase (EC 2.3.1.85) [Includes: [Acyl-carrier-protein] S- acetyltransferase (EC 2.3.1.38); [Acyl-carrier-protein] S- malonyltransferase (EC 2.3.1.39); 3-oxoacyl-[acyl-carrier-protein] synthase (EC 2.3.1.41); 3-oxoacyl-[acyl-carrier-protein] r	chr17 77629503
NM_004109	NM_004109	Adrenodoxin, mitochondrial precursor (Adrenal ferredoxin) (Ferredoxin- 1) (Hepatoredoxin).	chr11 109805803
NM_004110	CR594512	NADPH:adrenodoxin oxidoreductase, mitochondrial precursor (EC 1.18.1.2) (Adrenodoxin reductase) (AR) (Ferredoxin--NADP(+) reductase).	chr17 70370245
NM_004110	NM_004110	NADPH:adrenodoxin oxidoreductase, mitochondrial precursor (EC 1.18.1.2) (Adrenodoxin reductase) (AR) (Ferredoxin--NADP(+) reductase).	chr17 70370220
NM_004110	NM_024417	NADPH:adrenodoxin oxidoreductase, mitochondrial precursor (EC 1.18.1.2) (Adrenodoxin reductase) (AR) (Ferredoxin--NADP(+) reductase).	chr17 70370221
NM_004134	NM_004134	Stress-70 protein, mitochondrial precursor (75 kDa glucose regulated protein) (GRP 75) (Peptide-binding protein 74) (PBP74) (Mortalin) (MOT).	chr5 137918923
NM_004135	NM_004135	Isocitrate dehydrogenase [NAD] subunit gamma, mitochondrial precursor (EC 1.1.1.41) (Isocitric dehydrogenase) (NAD(+)-specific ICDH).	chrX 152704415
NM_004135	NM_174869	Isocitrate dehydrogenase [NAD] subunit gamma, mitochondrial precursor (EC 1.1.1.41) (Isocitric dehydrogenase) (NAD(+)-specific ICDH).	chrX 152704415
NM_004146	NM_004146	NADH-ubiquinone oxidoreductase B18 subunit (EC 1.6.5.3) (EC 1.6.99.3) (Complex I-B18) (CI-B18) (Cell adhesion protein SQM1).	chr19 14537891
NM_004169	NM_004169	Serine hydroxymethyltransferase, cytosolic (EC 2.1.2.1) (Serine methylase) (Glycine hydroxymethyltransferase) (SHMT).	chr17 18171919
NM_004169	NM_148918	Cytosolic serine hydroxymethyltransferase (EC 2.1.2.1) (Fragment).	chr17 18171919
NM_004184	NM_004184	Tryptophanyl-tRNA synthetase (EC 6.1.1.2) (Tryptophan--tRNA ligase) (TrpRS) (IFP53) (hWRS).	chr14 99869877
NM_004195	NM_004195	Tumor necrosis factor receptor superfamily member 18 precursor (Glucocorticoid-induced TNFR-related protein) (Activation-inducible TNFR family receptor).	chr1 1128751
NM_004195	NM_148901	Tumor necrosis factor receptor superfamily, member 18.	chr1 1128751
NM_004195	NM_148902	Tumor necrosis factor receptor superfamily, member 18.	chr1 1128751
NM_004208	NM_004208	Programmed cell death protein 8, mitochondrial precursor (EC 1.-.-.-) (Apoptosis-inducing factor).	chrX 129091019
NM_004208	NM_145812	Programmed cell death 8 (Apoptosis-inducing factor).	chrX 129091019
NM_004208	NM_145813	Programmed cell death 8 (Apoptosis-inducing factor).	chrX 129091019
NM_004214	NM_004214	FGF intracellular binding protein isoform b variant (Fragment).	chr11 65407787
NM_004214	NM_198897	Acidic fibroblast growth factor intracellular binding protein (aFGF intracellular binding protein) (FGF-1 intracellular binding protein).	chr11 65407787
NM_004255	NM_004255	Cytochrome c oxidase polypeptide Va, mitochondrial precursor (EC 1.9.3.1).	chr15 72999671
NM_004279	BC010398	Mitochondrial processing peptidase beta subunit, mitochondrial precursor (EC 3.4.24.64) (Beta-MPP) (P-52).	chr7 102725128
NM_004279	NM_004279	Mitochondrial processing peptidase beta subunit, mitochondrial precursor (EC 3.4.24.64) (Beta-MPP) (P-52).	chr7 102725134
NM_004294	NM_004294	Peptide chain release factor 1, mitochondrial precursor (MRF-1).	chr13 40688516
NM_004299	AF133659	ATP-binding cassette sub-family B member 7, mitochondrial precursor (ATP-binding cassette transporter 7) (ABC transporter 7 protein).	chrX 74189843
NM_004299	NM_004299	ATP-binding cassette sub-family B member 7, mitochondrial precursor (ATP-binding cassette transporter 7) (ABC transporter 7 protein).	chrX 74189831
NM_004322	NM_004322	Bcl2-antagonist of cell death (BAD) (Bcl-2 binding component 6) (Bcl- XL/Bcl-2-associated death promoter) (Bcl-2-like 8 protein).	chr11 63793877
NM_004324	BC014175	Bax isoform psi.	chr19 54149945
NM_004324	BC014175	Bax zeta.	chr19 54149945
NM_004324	NM_004324	Apoptosis regulator BAX, cytoplasmic isoform beta.	chr19 54149928
NM_004324	NM_138761	BAX protein, cytoplasmic isoform delta.	chr19 54149928
NM_004324	NM_138763	BAX protein, cytoplasmic isoform delta.	chr19 54149928
NM_004324	NM_138764	BAX protein, cytoplasmic isoform gamma.	chr19 54149928
NM_004324	NM_138765	BAX protein, cytoplasmic isoform gamma.	chr19 54149928
NM_004328	NM_004328	Mitochondrial chaperone BCS1 (BCS1-like protein) (H-BCS1).	chr2 219232701
NM_004331	NM_004331	BCL2/adenovirus E1B 19-kDa protein-interacting protein 3-like (NIP3L) (NIP3-like protein X) (BCL2/adenovirus E1B 19-kDa protein-interacting protein 3A).	chr8 26296439
NM_004341	NM_004341	CAD protein [Includes: Glutamine-dependent carbamoyl-phosphate synthase (EC 6.3.5.5); Aspartate carbamoyltransferase (EC 2.1.3.2); Dihydroorotase (EC 3.5.2.3)].	chr2 27293761
NM_004373	BC107861	Cytochrome c oxidase subunit VIa.	chr12 119360298
NM_004373	NM_004373	Cytochrome c oxidase polypeptide VIa-liver, mitochondrial precursor (EC 1.9.3.1).	chr12 119360286
NM_004374	AK128382	Hypothetical protein FLJ46525 (Hypothetical protein FLJ41478).	chr8 100959553
NM_004374	NM_004374	Cytochrome c oxidase polypeptide VIc precursor (EC 1.9.3.1).	chr8 100959547
NM_004375	AK124809	Hypothetical protein FLJ42819.	chr17 50384265
NM_004375	AK127404	Hypothetical protein FLJ45495.	chr17 50384265
NM_004375	NM_004375	Cytochrome c oxidase assembly protein COX11, mitochondrial precursor.	chr17 50384265
NM_004376	NM_004376	COX15 homolog cytochrome c oxidase assembly protein (Yeast).	chr10 101461595
NM_004376	NM_078470	Cytochrome c oxidase assembly protein COX15 homolog.	chr10 101461595
NM_004377	NM_004377	Carnitine O-palmitoyltransferase I, mitochondrial muscle isoform (EC 2.3.1.21) (CPT I) (CPTI-M) (Carnitine palmitoyltransferase 1B) (Carnitine palmitoyltransferase I-like protein).	chr22 49354156
NM_004409	BC026328	DMPK protein.	chr19 50964815
NM_004409	M87312	Myotonin-protein kinase (EC 2.7.1.37) (Myotonic dystrophy protein kinase) (MDPK) (DM-kinase) (DMK) (DMPK) (MT-PK).	chr19 50964822
NM_004409	M87312	n/a	chr19 50964822
NM_004409	NM_004409	Myotonin-protein kinase (EC 2.7.1.37) (Myotonic dystrophy protein kinase) (MDPK) (DM-kinase) (DMK) (DMPK) (MT-PK).	chr19 50964815
NM_004435	NM_004435	Endonuclease G, mitochondrial precursor (EC 3.1.30.-) (Endo G).	chr9 130620599
NM_004446	NM_004446	Bifunctional aminoacyl-tRNA synthetase [Includes: Glutamyl-tRNA synthetase (EC 6.1.1.17) (Glutamate--tRNA ligase); Prolyl-tRNA synthetase (EC 6.1.1.15) (Proline--tRNA ligase)].	chr1 218208566
NM_004453	BX538129	n/a	chr4 159812932
NM_004453	NM_004453	Electron transfer flavoprotein-ubiquinone oxidoreductase, mitochondrial precursor (EC 1.5.5.1) (ETF-QO) (ETF-ubiquinone oxidoreductase) (ETF dehydrogenase) (Electron-transferring- flavoprotein dehydrogenase).	chr4 159812945
NM_004457	BC041692	PRO2194.	chr2 223433983
NM_004457	NM_004457	Long-chain-fatty-acid--CoA ligase 3 (EC 6.2.1.3) (Long-chain acyl-CoA synthetase 3) (LACS 3).	chr2 223433975
NM_004458	NM_004458	Acyl-CoA synthetase long-chain family member 4.	chrX 108771221
NM_004458	NM_022977	Long-chain-fatty-acid--CoA ligase 4 (EC 6.2.1.3) (Long-chain acyl-CoA synthetase 4) (LACS 4).	chrX 108771221
NM_004461	NM_004461	Phenylalanyl-tRNA synthetase alpha chain (EC 6.1.1.20) (Phenylalanine--tRNA ligase alpha chain) (PheRS) (CML33).	chr19 12894293
NM_004483	NM_004483	Glycine cleavage system H protein, mitochondrial precursor.	chr16 79673431
NM_004539	NM_004539	Asparaginyl-tRNA synthetase, cytoplasmic (EC 6.1.1.22) (Asparagine-- tRNA ligase) (AsnRS).	chr18 53418893
NM_004541	NM_004541	NADH-ubiquinone oxidoreductase MWFE subunit (EC 1.6.5.3) (EC 1.6.99.3) (Complex I-MWFE) (CI-MWFE).	chrX 118889761
NM_004542	NM_004542	NADH-ubiquinone oxidoreductase B9 subunit (EC 1.6.5.3) (EC 1.6.99.3) (Complex I-B9) (CI-B9).	chr19 59297971
NM_004544	NM_004544	NADH-ubiquinone oxidoreductase 42 kDa subunit, mitochondrial precursor (EC 1.6.5.3) (EC 1.6.99.3) (Complex I-42KD) (CI-42KD).	chr2 240548830
NM_004545	BC104672	NADH-ubiquinone oxidoreductase MNLL subunit (EC 1.6.5.3) (EC 1.6.99.3) (Complex I-MNLL) (CI-MNLL).	chr14 91652221
NM_004545	NM_004545	NADH-ubiquinone oxidoreductase MNLL subunit (EC 1.6.5.3) (EC 1.6.99.3) (Complex I-MNLL) (CI-MNLL).	chr14 91652222
NM_004546	BC063026	NADH-ubiquinone oxidoreductase AGGG subunit (NDUFB2 protein).	chr7 140042978
NM_004546	NM_004546	NADH-ubiquinone oxidoreductase AGGG subunit, mitochondrial precursor (EC 1.6.5.3) (EC 1.6.99.3) (Complex I-AGGG) (CI-AGGG).	chr7 140042949
NM_004547	NM_004547	NADH-ubiquinone oxidoreductase B15 subunit (EC 1.6.5.3) (EC 1.6.99.3) (Complex I-B15) (CI-B15).	chr3 121797817
NM_004547	NM_004547	NADH-ubiquinone oxidoreductase B15 subunit (EC 1.6.5.3) (EC 1.6.99.3) (Complex I-B15) (CI-B15).	chr3_random 99209
NM_004548	BC007509	NADH-ubiquinone oxidoreductase PDSW subunit (EC 1.6.5.3) (EC 1.6.99.3) (Complex I-PDSW) (CI-PDSW).	chr16 1949562
NM_004548	NM_004548	NADH-ubiquinone oxidoreductase PDSW subunit (EC 1.6.5.3) (EC 1.6.99.3) (Complex I-PDSW) (CI-PDSW).	chr16 1949532
NM_004550	NM_004550	NADH-ubiquinone oxidoreductase 49 kDa subunit, mitochondrial precursor (EC 1.6.5.3) (EC 1.6.99.3) (Complex I-49KD) (CI-49KD).	chr1 159435728
NM_004551	NM_004551	NADH-ubiquinone oxidoreductase 30 kDa subunit, mitochondrial precursor (EC 1.6.5.3) (EC 1.6.99.3) (Complex I-30KD) (CI-30KD).	chr11 47557207
NM_004552	NM_004552	NADH-ubiquinone oxidoreductase 15 kDa subunit (EC 1.6.5.3) (EC 1.6.99.3) (Complex I-15 kDa) (CI-15 kDa).	chr1 39264592
NM_004564	NM_004564	Probable glutamyl-tRNA(Gln) amidotransferase subunit B, mitochondrial precursor (EC 6.3.5.-) (Glu-ADT subunit B) (Cytochrome oxidase assembly factor PET112 homolog).	chr4 152811450
NM_004589	NM_004589	SCO1 protein homolog, mitochondrial precursor.	chr17 10524379
NM_004614	NM_004614	Thymidine kinase 2, mitochondrial precursor (EC 2.7.1.21) (Mt-TK).	chr16 65102150
NM_004614	U77088	Thymidine kinase 2 isoform B (Fragment).	chr16 65102147
NM_004614	Y10498	Thymidine kinase 2, mitochondrial precursor (EC 2.7.1.21) (Mt-TK).	chr16 65102150
NM_004649	NM_004649	ES1 protein homolog, mitochondrial precursor (Protein KNP-I) (Protein GT335).	chr21 44377923
NM_004649	NM_198155	n/a	chr21 44377923
NM_004680	NM_004680	CDY1 protein.	chrY 24600763
NM_004680	NM_004680	CDY1 protein.	chrY 26177651
NM_004680	NM_170723	Testis-specific chromodomain protein Y 1.	chrY 26177651
NM_004718	NM_004718	Cytochrome c oxidase subunit VIIa-related protein, mitochondrial precursor (COX7a-related protein) (EB1).	chr2 42431147
NM_004749	NM_004749	Cell cycle progression 2 protein, isoform 1.	chr7 45106224
NM_004749	NM_030900	KIAA0948 protein (Fragment).	chr7 45106224
NM_004758	AB014512	n/a	chr17 53733594
NM_004758	NM_004758	Peripheral-type benzodiazepine receptor-associated protein 1 (PRAX-1) (Peripheral benzodiazepine receptor interacting protein) (PBR-IP) (RIM binding protein 1) (RIM-BP1).	chr17 53733592
NM_004793	AK096626	Hypothetical protein FLJ39307.	chr19 5642845
NM_004793	AK127867	Hypothetical protein FLJ39307.	chr19 5642845
NM_004793	NM_004793	Lon protease homolog, mitochondrial precursor (EC 3.4.21.-) (Lon protease-like protein) (LONP) (LONHs).	chr19 5642845
NM_004793	X74215	Hypothetical protein (Fragment).	chr19 5642845
NM_004793	X76040	Lon protease homolog, mitochondrial precursor (EC 3.4.21.-) (Lon protease-like protein) (LONP) (LONHs).	chr19 5642845
NM_004832	BC000127	Glutathione S-transferase omega 1 (Fragment).	chr10 106004647
NM_004832	NM_004832	Glutathione transferase omega 1 (EC 2.5.1.18) (GSTO 1-1).	chr10 106004667
NM_004881	NM_004881	Putative quinone oxidoreductase (EC 1.-.-.-) (Tumor protein p53- inducible protein 3) (p53-induced protein 3).	chr2 24153808
NM_004891	NM_004891	50S ribosomal protein L33. Ribosomal protein L33-like protein (Mitochondrial ribosomal protein L33, isoform a) (MRPL33 protein).	chr2 27848089
NM_004891	NM_145330	Mitochondrial ribosomal protein L33, isoform b.	chr2 27848089
NM_004894	BX161388	6.8 kDa mitochondrial proteolipid.	chr14 103448391
NM_004894	NM_004894	6.8 kDa mitochondrial proteolipid.	chr14 103448379
NM_004905	NM_004905	Peroxiredoxin 6 (EC 1.11.1.15) (Antioxidant protein 2) (1-Cys peroxiredoxin) (1-Cys PRX) (Acidic calcium-independent phospholipase A2) (EC 3.1.1.-) (aiPLA2) (Non-selenium glutathione peroxidase) (EC 1.11.1.7) (NSGPx) (24 kDa protein) (Liver 2D page spot 4	chr1 171713108
NM_004927	NM_004927	Mitochondrial 39S ribosomal protein L49 (L49mt) (MRP-L49) (Protein NOF1) (Neighbor of FAU) (NOF).	chr11 64646303
NM_005000	NM_005000	NADH-ubiquinone oxidoreductase 13 kDa-B subunit (EC 1.6.5.3) (EC 1.6.99.3) (Complex I-13Kd-B) (CI-13Kd-B) (Complex I subunit B13).	chr7 122968319
NM_005002	NM_005002	NADH-ubiquinone oxidoreductase 39 kDa subunit, mitochondrial precursor (EC 1.6.5.3) (EC 1.6.99.3) (Complex I-39KD) (CI-39KD).	chr12 4628543
NM_005003	NM_005003	Acyl carrier protein, mitochondrial precursor (ACP) (NADH-ubiquinone oxidoreductase 9.6 kDa subunit) (CI-SDAP).	chr16 23499838
NM_005004	BC000466	NADH dehydrogenase (Ubiquinone) 1 beta subcomplex 8, 19kDa.	chr10 102273487
NM_005004	NM_005004	NADH-ubiquinone oxidoreductase ASHI subunit, mitochondrial precursor (EC 1.6.5.3) (EC 1.6.99.3) (Complex I-ASHI) (CI-ASHI).	chr10 102273487
NM_005005	NM_005005	NADH-ubiquinone oxidoreductase B22 subunit (EC 1.6.5.3) (EC 1.6.99.3) (Complex I-B22) (CI-B22).	chr8 125620535
NM_005006	NM_005006	NADH-ubiquinone oxidoreductase 75 kDa subunit, mitochondrial precursor (EC 1.6.5.3) (EC 1.6.99.3) (Complex I-75Kd) (CI-75Kd).	chr2 206696048
NM_005072	NM_005072	Solute carrier family 12 member 4 (Electroneutral potassium-chloride cotransporter 1) (Erythroid K-Cl cotransporter 1) (hKCC1).	chr16 66535730
NM_005125	NM_005125	Copper chaperone for superoxide dismutase (Superoxide dismutase copper chaperone).	chr11 66117265
NM_005138	NM_005138	SCO2 protein homolog, mitochondrial precursor.	chr22 49308864
NM_005147	BC012343	n/a	chr16 4415890
NM_005147	BC032100	n/a	chr16 4415869
NM_005147	NM_005147	DnaJ homolog subfamily A member 3, mitochondrial precursor (Tumorous imaginal discs protein Tid56 homolog) (DnaJ protein Tid-1) (hTid-1).	chr16 4415882
NM_005205	NM_005205	Cytochrome c oxidase polypeptide VIa-heart, mitochondrial precursor (EC 1.9.3.1) (COXVIAH).	chr16 31346555
NM_005262	NM_005262	Augmenter of liver regeneration (hERV1 protein).	chr16 1974150
NM_005271	NM_005271	Glutamate dehydrogenase 1, mitochondrial precursor (EC 1.4.1.3) (GDH).	chr10 88800222
NM_005309	NM_005309	Alanine aminotransferase (EC 2.6.1.2) (Glutamic--pyruvic transaminase) (GPT) (Glutamic--alanine transaminase).	chr8 145700232
NM_005326	NM_005326	Hydroxyacylglutathione hydrolase (EC 3.1.2.6) (Glyoxalase II) (GLX II).	chr16 1799105
NM_005327	NM_005327	Short chain 3-hydroxyacyl-CoA dehydrogenase, mitochondrial precursor (EC 1.1.1.35) (HCDH) (Medium and short chain L-3-hydroxyacyl-coenzyme A dehydrogenase).	chr4 109130450
NM_005333	NM_005333	Cytochrome c-type heme lyase (EC 4.4.1.17) (CCHL) (Holocytochrome c- type synthase).	chrX 11039372
NM_005335	NM_005335	Hematopoietic lineage cell-specific protein (Hematopoietic cell- specific LYN substrate 1) (LckBP1) (p75).	chr3 122832936
NM_005390	NM_005390	Pyruvate dehydrogenase E1 component alpha subunit, testis-specific form, mitochondrial precursor (EC 1.2.4.1) (PDHE1-A type II).	chr4 96980265
NM_005391	NM_005391	[Pyruvate dehydrogenase [lipoamide]] kinase isozyme 3, mitochondrial precursor (EC 2.7.1.99) (Pyruvate dehydrogenase kinase isoform 3).	chrX 24393474
NM_005412	BC011911	Hypothetical protein DKFZp686P09201.	chr12 55909818
NM_005412	NM_005412	Serine hydroxymethyltransferase, mitochondrial precursor (EC 2.1.2.1) (Serine methylase) (Glycine hydroxymethyltransferase) (SHMT).	chr12 55909818
NM_005504	NM_005504	Branched-chain-amino-acid aminotransferase, cytosolic (EC 2.6.1.42) (BCAT(c)) (ECA39 protein).	chr12 24855547
NM_005518	NM_005518	Hydroxymethylglutaryl-CoA synthase, mitochondrial precursor (EC 2.3.3.10) (HMG-CoA synthase) (3-hydroxy-3-methylglutaryl coenzyme A synthase).	chr1 120092527
NM_005530	AK096721	Hypothetical protein FLJ39402.	chr15 76228773
NM_005530	BC021967	n/a	chr15 76228780
NM_005530	CR749548	Isocitrate dehydrogenase [NAD] subunit alpha, mitochondrial precursor (EC 1.1.1.41) (Isocitric dehydrogenase) (NAD(+)-specific ICDH).	chr15 76228774
NM_005530	NM_005530	Isocitrate dehydrogenase [NAD] subunit alpha, mitochondrial precursor (EC 1.1.1.41) (Isocitric dehydrogenase) (NAD(+)-specific ICDH).	chr15 76228773
NM_005548	NM_005548	Lysyl-tRNA synthetase (EC 6.1.1.6) (Lysine--tRNA ligase) (LysRS).	chr16 74219131
NM_005589	NM_005589	Methylmalonate-semialdehyde dehydrogenase [acylating], mitochondrial precursor (EC 1.2.1.27) (MMSDH) (Malonate-semialdehyde dehydrogenase [acylating]) (EC 1.2.1.18).	chr14 73596625
NM_005622	AK223139	SA gene.	chr16 20682843
NM_005622	NM_005622	SA gene.	chr16 20682812
NM_005622	NM_202000	SA protein.	chr16 20682812
NM_005662	NM_005662	Voltage-dependent anion-selective channel protein 3 (VDAC-3) (hVDAC3) (Outer mitochondrial membrane protein porin 3).	chr8 42368546
NM_005689	AK057026	ABCB6 protein.	chr2 219782737
NM_005689	AK172812	Hypothetical protein FLJ23973.	chr2 219782737
NM_005689	BC043423	ABCB6 protein.	chr2 219782737
NM_005689	NM_005689	ATP-binding cassette sub-family B member 6, mitochondrial precursor (Mitochondrial ABC transporter 3) (Mt-ABC transporter 3) (ABC transporter umat).	chr2 219782737
NM_005690	AB209070	n/a	chr12 32723523
NM_005690	CR612950	n/a	chr12 32723520
NM_005690	NM_005690	Hypothetical protein (Fragment).	chr12 32723490
NM_005690	NM_012062	Dynamin-1-like protein (EC 3.6.5.5) (Dynamin-like protein) (Dnm1p/Vps1p-like protein) (DVLP) (Dynamin family member proline-rich carboxyl-terminal domain less) (Dymple) (Dynamin-related protein 1) (Dynamin-like protein 4) (Dynamin-like protein IV) (HdynIV	chr12 32723490
NM_005690	NM_012063	Hypothetical protein (Fragment).	chr12 32723490
NM_005692	NM_005692	ATP-binding cassette sub-family F member 2 (Iron-inhibited ABC transporter 2).	chr7 150535855
NM_005694	NM_005694	Cytochrome c oxidase copper chaperone.	chr3 120871061
NM_005702	NM_005702	GTP-binding protein era homolog (hERA) (ERA-W) (Conserved ERA-like GTPase) (CEGA).	chr17 24206168
NM_005726	BC093068	Elongation factor Ts, mitochondrial precursor (EF-Ts) (EF-TsMt).	chr12 56462839
NM_005726	NM_005726	Elongation factor Ts, mitochondrial precursor (EF-Ts) (EF-TsMt).	chr12 56462825
NM_005729	BC110299	Hypothetical protein.	chr10 80777248
NM_005729	NM_005729	Peptidyl-prolyl cis-trans isomerase, mitochondrial precursor (EC 5.2.1.8) (PPIase) (Rotamase) (Cyclophilin F).	chr10 80777225
NM_005763	NM_005763	Alpha-aminoadipic semialdehyde synthase, mitochondrial precursor (LKR/SDH) [Includes: Lysine ketoglutarate reductase (EC 1.5.1.8) (LOR) (LKR); Saccharopine dehydrogenase (EC 1.5.1.9) (SDH)].	chr7 121503422
NM_005794	NM_005794	Dehydrogenase/reductase SDR family member 2 (EC 1.1.-.-) (HEP27 protein) (Protein D).	chr14 23175421
NM_005794	NM_182908	Dehydrogenase/reductase SDR family member 2 (EC 1.1.-.-) (HEP27 protein) (Protein D).	chr14 23175421
NM_005803	NM_005803	Flotillin-1.	chr6 30803491
NM_005803	NM_005803	Flotillin-1.	chr6_cox_hap1 2144085
NM_005803	NM_005803	Flotillin-1.	chr6_qbl_hap2 1942391
NM_005809	NM_005809	Peroxiredoxin 2 (EC 1.11.1.15) (Thioredoxin peroxidase 1) (Thioredoxin-dependent peroxide reductase 1) (Thiol-specific antioxidant protein) (TSA) (PRP) (Natural killer cell-enhancing factor B) (NKEF-B).	chr19 12768634
NM_005830	NM_005830	28S ribosomal protein S31, mitochondrial precursor (S31mt) (MRP-S31) (Imogen 38).	chr13 40201432
NM_005834	BC091473	Mitochondrial import inner membrane translocase subunit Tim17-B.	chrX 48635675
NM_005834	NM_005834	Mitochondrial import inner membrane translocase subunit Tim17-B.	chrX 48635675
NM_005836	NM_005836	Ribonuclease UK114 (EC 3.1.-.-) (14.5 kDa translational inhibitor protein) (p14.5) (UK114 antigen homolog).	chr8 99183742
NM_005838	AF023466	Putative glycine-N-acyltransferase (EC 2.3.1.13).	chr11 58234138
NM_005838	NM_005838	Putative glycine-N-acyltransferase (EC 2.3.1.13).	chr11 58234138
NM_005880	NM_005880	DnaJ homolog subfamily A member 2 (HIRA-interacting protein 4) (Cell cycle progression restoration gene 3 protein) (Dnj3).	chr16 45547795
NM_005881	BC009872	BCKDK protein.	chr16 31027252
NM_005881	CR622376	BCKDK protein.	chr16 31027240
NM_005881	NM_005881	[3-methyl-2-oxobutanoate dehydrogenase [lipoamide]] kinase, mitochondrial precursor (EC 2.7.1.115) (Branched-chain alpha-ketoacid dehydrogenase kinase) (BCKDHKIN) (BCKD-kinase).	chr16 31027248
NM_005896	BX537411	Isocitrate dehydrogenase [NADP] cytoplasmic (EC 1.1.1.42) (Oxalosuccinate decarboxylase) (IDH) (NADP(+)-specific ICDH) (IDP).	chr2 208809200
NM_005896	NM_005896	Isocitrate dehydrogenase [NADP] cytoplasmic (EC 1.1.1.42) (Oxalosuccinate decarboxylase) (IDH) (NADP(+)-specific ICDH) (IDP).	chr2 208809198
NM_005917	NM_005917	Malate dehydrogenase, cytoplasmic (EC 1.1.1.37).	chr2 63669625
NM_005918	NM_005918	Malate dehydrogenase, mitochondrial precursor (EC 1.1.1.37).	chr7 75515328
NM_005923	NM_005923	Mitogen-activated protein kinase kinase kinase 5 (EC 2.7.1.37) (MAPK/ERK kinase kinase 5) (MEK kinase 5) (MEKK 5) (Apoptosis signal- regulating kinase 1) (ASK-1).	chr6 136919880
NM_005932	NM_005932	Mitochondrial intermediate peptidase, mitochondrial precursor (EC 3.4.24.59) (MIP).	chr13 23202328
NM_005940	NM_005940	Stromelysin-3 precursor (EC 3.4.24.-) (ST3) (SL-3) (Matrix metalloproteinase-11) (MMP-11).	chr22 22445035
NM_005942	AJ224328	Migration-inducing gene 11 protein.	chr6 39981278
NM_005942	NM_005942	Molybdenum cofactor biosynthesis protein 1 B (MOCS1B) (Molybdenum cofactor synthesis-step 1 protein A-B) (Molybdenum cofactor biosynthesis protein C).	chr6 39981278
NM_005942	NM_005943	Molybdenum cofactor biosynthesis protein 1 A (MOCS1A).	chr6 39981278
NM_005942	NM_138928	Migration-inducing gene 11 protein.	chr6 39981278
NM_005956	NM_005956	C-1-tetrahydrofolate synthase, cytoplasmic (C1-THF synthase) [Includes: Methylenetetrahydrofolate dehydrogenase (EC 1.5.1.5); Methenyltetrahydrofolate cyclohydrolase (EC 3.5.4.9); Formyltetrahydrofolate synthetase (EC 6.3.4.3)].	chr14 63924845
NM_005983	NM_005983	S-phase kinase-associated protein 2 (F-box protein Skp2) (Cyclin A/CDK2-associated protein p45) (p45skp2) (F-box/LRR-repeat protein 1).	chr5 36187945
NM_005983	NM_032637	n/a	chr5 36187945
NM_005984	NM_005984	Tricarboxylate transport protein, mitochondrial precursor (Citrate transport protein) (CTP) (Tricarboxylate carrier protein).	chr22 17543094
NM_006003	NM_006003	Ubiquinol-cytochrome c reductase iron-sulfur subunit, mitochondrial precursor (EC 1.10.2.2) (Rieske iron-sulfur protein) (RISP).	chr19 34390006
NM_006004	BC093060	Ubiquinol-cytochrome c reductase complex 11 kDa protein, mitochondrial precursor (EC 1.10.2.2) (Mitochondrial hinge protein) (Cytochrome C1, nonheme 11 kDa protein) (Complex III subunit VIII).	chr1 46541956
NM_006004	NM_006004	Ubiquinol-cytochrome c reductase complex 11 kDa protein, mitochondrial precursor (EC 1.10.2.2) (Mitochondrial hinge protein) (Cytochrome C1, nonheme 11 kDa protein) (Complex III subunit VIII).	chr1 46541966
NM_006012	NM_006012	Putative ATP-dependent Clp protease proteolytic subunit, mitochondrial precursor (EC 3.4.21.92) (Endopeptidase Clp).	chr19 6312462
NM_006111	NM_006111	3-ketoacyl-CoA thiolase, mitochondrial (EC 2.3.1.16) (Beta- ketothiolase) (Acetyl-CoA acyltransferase) (Mitochondrial 3-oxoacyl- CoA thiolase) (T1).	chr18 45563872
NM_006114	BC047528	Probable mitochondrial import receptor subunit TOM40 homolog (Translocase of outer membrane 40 kDa subunit homolog) (Haymaker protein) (p38.5).	chr19 50086327
NM_006114	NM_006114	Probable mitochondrial import receptor subunit TOM40 homolog (Translocase of outer membrane 40 kDa subunit homolog) (Haymaker protein) (p38.5).	chr19 50086333
NM_006125	NM_006125	Rho GTPase activating protein 6 isoform 1 variant (Fragment).	chrX 11071437
NM_006223	BC093700	Peptidyl-prolyl cis-trans isomerase NIMA-interacting 4 (EC 5.2.1.8) (Rotamase Pin4) (PPIase Pin4) (Parvulin 14) (Par14) (Peptidyl-prolyl cis/trans isomerase EPVH) (hPar14).	chrX 71318253
NM_006223	NM_006223	Peptidyl-prolyl cis-trans isomerase NIMA-interacting 4 (EC 5.2.1.8) (Rotamase Pin4) (PPIase Pin4) (Parvulin 14) (Par14) (Peptidyl-prolyl cis/trans isomerase EPVH) (hPar14).	chrX 71318250
NM_006294	NM_006294	Ubiquinol-cytochrome c reductase complex 14 kDa protein (EC 1.10.2.2) (Complex III subunit VI) (QP-C).	chr8 97311910
NM_006327	NM_006327	Mitochondrial import inner membrane translocase subunit Tim23.	chr10 51262095
NM_006335	NM_006335	Mitochondrial import inner membrane translocase subunit Tim17-A (Inner membrane preprotein translocase Tim17a).	chr1 200191270
NM_006344	CR620226	n/a	chr17 6918608
NM_006344	NM_006344	n/a	chr17 6918580
NM_006344	NM_182906	C-type lectin domain family 10 member A (C-type lectin, superfamily member 14) (Macrophage lectin 2) (CD301 antigen).	chr17 6918580
NM_006345	AY319413	Chromosome 4 open reading frame 1.	chr4 41687325
NM_006345	NM_006345	Hypothetical protein SLC30A9 (Fragment).	chr4 41687279
NM_006351	BC033628	Putative mitochondrial inner membrane protein import receptor.	chr19 7897603
NM_006351	NM_006351	Import inner membrane translocase subunit TIM44, mitochondrial precursor.	chr19 7897603
NM_006358	NM_006358	Peroxisomal membrane protein PMP34 (34 kDa peroxisomal membrane protein) (Solute carrier family 25 member 17).	chr22 39495586
NM_006359	BC035029	Sodium/hydrogen exchanger 6 (Na(+)/H(+) exchanger 6) (NHE-6) (Solute carrier family 9 member 6).	chrX 134895296
NM_006359	BC035029	Sodium/hydrogen exchanger.	chrX 134895296
NM_006359	NM_006359	Sodium/hydrogen exchanger 6 (Na(+)/H(+) exchanger 6) (NHE-6) (Solute carrier family 9 member 6).	chrX 134895292
NM_006420	NM_006420	Brefeldin A-inhibited guanine nucleotide-exchange protein 2 (Brefeldin A-inhibited GEP 2).	chr20 46971833
NM_006430	NM_006430	T-complex protein 1, delta subunit (TCP-1-delta) (CCT-delta) (Stimulator of TAR RNA binding).	chr2 61948766
NM_006431	CR599514	PRO1633.	chr12 68265507
NM_006431	NM_006431	T-complex protein 1, beta subunit (TCP-1-beta) (CCT-beta).	chr12 68265474
NM_006441	NM_006441	5-formyltetrahydrofolate cyclo-ligase (EC 6.3.3.2) (5,10-methenyl- tetrahydrofolate synthetase) (Methenyl-THF synthetase) (MTHFS).	chr15 77924374
NM_006476	NM_006476	ATP synthase g chain, mitochondrial (EC 3.6.3.14) (ATPase subunit G).	chr11 117777313
NM_006513	CR626109	Seryl-tRNA synthetase.	chr1 109558085
NM_006513	NM_006513	Seryl-tRNA synthetase (EC 6.1.1.11) (Serine--tRNA ligase) (SerRS).	chr1 109558062
NM_006541	NM_006541	Thioredoxin-like protein 2 (PKC-interacting cousin of thioredoxin) (PKC-theta-interacting protein) (PKCq-interacting protein).	chr10 131824671
NM_006584	CR933688	Hypothetical protein DKFZp686J1223.	chr17 30279061
NM_006584	NM_006584	T-complex protein 1, zeta-2 subunit (TCP-1-zeta-2) (CCT-zeta-2) (TCP- 1-zeta-like) (CCT-zeta-like) (Testis-specific Tcp20) (Testis-specific protein TSA303).	chr17 30279051
NM_006636	BC015062	Bifunctional methylenetetrahydrofolate dehydrogenase/cyclohydrolase, mitochondrial precursor [Includes: NAD-dependent methylenetetrahydrofolate dehydrogenase (EC 1.5.1.15); Methenyltetrahydrofolate cyclohydrolase (EC 3.5.4.9)].	chr2 74279251
NM_006636	BC017054	Bifunctional methylenetetrahydrofolate dehydrogenase/cyclohydrolase, mitochondrial precursor [Includes: NAD-dependent methylenetetrahydrofolate dehydrogenase (EC 1.5.1.15); Methenyltetrahydrofolate cyclohydrolase (EC 3.5.4.9)].	chr2 74279269
NM_006636	NM_006636	Bifunctional methylenetetrahydrofolate dehydrogenase/cyclohydrolase, mitochondrial precursor [Includes: NAD-dependent methylenetetrahydrofolate dehydrogenase (EC 1.5.1.15); Methenyltetrahydrofolate cyclohydrolase (EC 3.5.4.9)].	chr2 74279219
NM_006660	NM_006660	ATP-dependent Clp protease ATP-binding subunit ClpX-like, mitochondrial precursor.	chr15 63229837
NM_006712	AK023141	Hypothetical protein FLJ13079.	chr7 150404645
NM_006712	BC000377	FASTK protein.	chr7 150404612
NM_006712	NM_006712	Fas-activated serine/threonine kinase (EC 2.7.1.-) (FAST kinase).	chr7 150404640
NM_006712	NM_033015	Fas-activated serine/threonine kinase, isoform 4.	chr7 150404640
NM_006793	NM_006793	Thioredoxin-dependent peroxide reductase, mitochondrial precursor (EC 1.11.1.15) (Peroxiredoxin 3) (Antioxidant protein 1) (AOP-1) (MER5 protein homolog) (HBC189) (PRX III).	chr10 120917205
NM_006793	NM_014098	Humer (Fragment).	chr10 120917205
NM_006796	NM_006796	AFG3-like protein 2 (EC 3.4.24.-) (Paraplegin-like protein).	chr18 12319107
NM_006804	NM_006804	MLN 64 protein (StAR-related lipid transfer protein 3) (StARD3) (START domain-containing protein 3) (CAB1 protein).	chr17 35046937
NM_006809	NM_006809	Mitochondrial import receptor subunit TOM34 (Translocase of outer membrane 34 kDa subunit) (hTom34).	chr20 43004184
NM_006821	AK001939	n/a	chr14 73105515
NM_006821	NM_006821	Peroxisomal acyl-coenzyme A thioester hydrolase 2a (EC 3.1.2.2) (Peroxisomal long-chain acyl-coA thioesterase 2) (ZAP128) (CTE-Ia).	chr14 73105531
NM_006834	NM_006834	Ras-related protein Rab-32.	chr6 146906520
NM_006839	AY232292	Mitochondrial inner membrane protein (Mitofilin) (p87/89) (Proliferation-inducing gene 4 protein).	chr2 86224573
NM_006839	BC107419	Hypothetical protein.	chr2 86224582
NM_006839	BX537369	Hypothetical protein.	chr2 86224566
NM_006839	NM_006839	Mitochondrial inner membrane protein (Mitofilin) (p87/89) (Proliferation-inducing gene 4 protein).	chr2 86224573
NM_006843	NM_006843	L-serine dehydratase (EC 4.3.1.17) (L-serine deaminase).	chr12 112314635
NM_006859	BC062751	Hypothetical protein.	chr4 39137072
NM_006859	NM_006859	Lipoic acid synthetase, mitochondrial precursor (Lip-syn) (Lipoate synthase).	chr4 39137059
NM_006859	NM_194451	Hypothetical protein.	chr4 39137059
NM_006860	BC000566	Putative GTP-binding protein RAY-like (Rab-like protein 4).	chr22 35484200
NM_006860	NM_006860	Putative GTP-binding protein RAY-like (Rab-like protein 4).	chr22 35484200
NM_006861	NM_006861	Ras-related protein Rab-35 (Rab-1C) (GTP-binding protein RAY).	chr12 119017288
NM_006907	BC071842	PYCR1 protein.	chr17 77483559
NM_006907	NM_006907	Pyrroline-5-carboxylate reductase 1 (EC 1.5.1.2) (P5CR 1) (P5C reductase 1).	chr17 77483559
NM_006907	NM_153824	Hypothetical protein.	chr17 77483559
NM_006911	NM_006911	Prorelaxin H1 precursor [Contains: Relaxin B chain; Relaxin A chain].	chr9 5324968
NM_007101	AK093794	Sarcosine dehydrogenase.	chr9 135518506
NM_007101	NM_007101	Sarcosine dehydrogenase, mitochondrial precursor (EC 1.5.99.1) (SarDH) (BPR-2).	chr9 135518506
NM_007103	BC008146	Hypothetical protein (Fragment).	chr11 67130986
NM_007103	CR624895	n/a	chr11 67131023
NM_007103	NM_007103	NADH-ubiquinone oxidoreductase 51 kDa subunit, mitochondrial precursor (EC 1.6.5.3) (EC 1.6.99.3) (Complex I-51KD) (CI-51KD) (NADH dehydrogenase flavoprotein 1).	chr11 67130982
NM_007169	NM_007169	Phosphatidylethanolamine N-methyltransferase (EC 2.1.1.17) (PEAMT) (PEMT) (PEMT2).	chr17 17349603
NM_007169	NM_148172	Phosphatidylethanolamine N-methyltransferase (EC 2.1.1.17) (PEAMT) (PEMT) (PEMT2).	chr17 17349603
NM_007188	AK002018	ATP-binding cassette sub-family B member 8, mitochondrial precursor (Mitochondrial ATP-binding cassette 1) (M-ABC1).	chr7 150356469
NM_007188	AK094636	Hypothetical protein FLJ37317.	chr7 150356462
NM_007188	AK128129	Hypothetical protein FLJ46250.	chr7 150356442
NM_007188	NM_007188	ATP-binding cassette sub-family B member 8, mitochondrial precursor (Mitochondrial ATP-binding cassette 1) (M-ABC1).	chr7 150356469
NM_007202	NM_007202	A kinase anchor protein 10, mitochondrial precursor (Protein kinase A- anchoring protein 10) (PRKA10) (Dual specificity A kinase-anchoring protein 2) (D-AKAP-2).	chr17 19749343
NM_007208	NM_007208	Mitochondrial 39S ribosomal protein L3 (L3mt) (MRP-L3).	chr3 132663735
NM_007274	AB074415	Brain acyl-CoA hydrolase (BACH).	chr1 6246919
NM_007274	AB074416	Brain acyl-CoA hydrolase (BACH).	chr1 6246919
NM_007274	BC017365	Brain acyl-CoA hydrolase.	chr1 6246919
NM_007274	NM_007274	Brain acyl-CoA hydrolase.	chr1 6246919
NM_007274	NM_181862	Brain acyl-CoA hydrolase (BACH).	chr1 6246919
NM_007274	NM_181863	Brain acyl-CoA hydrolase (BACH).	chr1 6246919
NM_007274	NM_181864	Cytosolic acyl coenzyme A thioester hydrolase (EC 3.1.2.2) (Long chain acyl-CoA thioester hydrolase) (CTE-II) (CTE-IIa) (Brain acyl-CoA hydrolase) (Acyl-CoA thioesterase 7).	chr1 6246919
NM_007274	NM_181865	Brain acyl-CoA hydrolase (BACH).	chr1 6246919
NM_007274	NM_181866	Brain acyl-CoA hydrolase (BACH).	chr1 6246919
NM_007275	NM_007275	Tumor suppressor candidate 2 (PDGFA-associated protein 2) (Fus-1 protein) (Fusion 1 protein).	chr3 50337344
NM_012073	NM_012073	T-complex protein 1, epsilon subunit (TCP-1-epsilon) (CCT-epsilon).	chr5 10303281
NM_012084	BC050732	GLUD2 protein.	chrX 120009142
NM_012084	NM_012084	Glutamate dehydrogenase 2, mitochondrial precursor (EC 1.4.1.3) (GDH).	chrX 120009142
NM_012089	NM_012089	ATP-binding cassette sub-family B member 10, mitochondrial precursor (ATP-binding cassette transporter 10) (ABC transporter 10 protein) (Mitochondrial ATP-binding cassette 2) (M-ABC2).	chr1 227718952
NM_012094	AF124993	Peroxiredoxin 5, mitochondrial precursor (EC 1.11.1.15) (Prx-V) (Peroxisomal antioxidant enzyme) (PLP) (Thioredoxin reductase) (Thioredoxin peroxidase PMP20) (Antioxidant enzyme B166) (AOEB166) (TPx type VI) (Liver tissue 2D-page spot 71B) (Alu corepresso	chr11 63842194
NM_012094	NM_012094	Peroxiredoxin 5, mitochondrial precursor (EC 1.11.1.15) (Prx-V) (Peroxisomal antioxidant enzyme) (PLP) (Thioredoxin reductase) (Thioredoxin peroxidase PMP20) (Antioxidant enzyme B166) (AOEB166) (TPx type VI) (Liver tissue 2D-page spot 71B) (Alu corepresso	chr11 63842144
NM_012123	AF469111	n/a	chr6 74228208
NM_012123	AY078986	n/a	chr6 74228208
NM_012123	BC011051	n/a	chr6 74228233
NM_012123	NM_012123	n/a	chr6 74228208
NM_012123	NM_133645	Protein MTO1 homolog, mitochondrial precursor.	chr6 74228208
NM_012137	BX648145	Hypothetical protein DKFZp686N2176.	chr1 85556756
NM_012137	NM_012137	NG,NG-dimethylarginine dimethylaminohydrolase 1 (EC 3.5.3.18) (Dimethylargininase 1) (Dimethylarginine dimethylaminohydrolase 1) (DDAHI) (DDAH-1).	chr1 85556756
NM_012140	BC015797	Mitochondrial dicarboxylate carrier.	chr17 77289741
NM_012140	NM_012140	Mitochondrial dicarboxylate carrier.	chr17 77289775
NM_012190	AK124908	Hypothetical protein FLJ42918.	chr3 127305105
NM_012190	BC027241	ALDH1L1 protein.	chr3 127305104
NM_012190	CR749807	10-formyltetrahydrofolate dehydrogenase (EC 1.5.1.6) (10-FTHFDH) (Aldehyde dehydrogenase 1 family member L1).	chr3 127305101
NM_012190	NM_012190	10-formyltetrahydrofolate dehydrogenase (EC 1.5.1.6) (10-FTHFDH) (Aldehyde dehydrogenase 1 family member L1).	chr3 127305097
NM_012192	NM_012192	Mitochondrial import inner membrane translocase subunit TIM9 B (Fracture callus protein 1) (FxC1) (TIM10B) (TIMM10B).	chr11 6459265
NM_012208	NM_012208	Histidyl-tRNA synthetase homolog (EC 6.1.1.21) (Histidine--tRNA ligase homolog) (HisRS).	chr5 140051201
NM_012213	BC052592	Malonyl-CoA decarboxylase, mitochondrial precursor (EC 4.1.1.9) (MCD).	chr16 82490230
NM_012213	NM_012213	Malonyl-CoA decarboxylase, mitochondrial precursor (EC 4.1.1.9) (MCD).	chr16 82490272
NM_012222	AB032921	MutY homolog (E. coli) (Fragment).	chr1 45567500
NM_012222	AB032924	MutY homolog (E. coli) (Fragment).	chr1 45567500
NM_012222	AB032927	MYHbeta (Fragment).	chr1 45567500
NM_012222	BC003178	MutY homolog (E. coli) (Fragment).	chr1 45567500
NM_012222	BC003178	n/a	chr1 45567500
NM_012222	NM_012222	A/G-specific adenine DNA glycosylase (EC 3.2.2.-) (MutY homolog) (hMYH).	chr1 45567500
NM_012225	NM_012225	Nucleotide binding protein 2 (NBP 2).	chr16 1772959
NM_012241	NM_012241	NAD-dependent deacetylase sirtuin-5 (EC 3.5.1.-) (SIR2-like protein 5).	chr6 13682853
NM_012331	BC054033	Methionine sulfoxide reductase A2 (EC 1.8.4.6).	chr8 9949239
NM_012331	NM_012331	Peptide methionine sulfoxide reductase (EC 1.8.4.6) (Protein- methionine-S-oxide reductase) (PMSR) (Peptide Met(O) reductase).	chr8 9949235
NM_012343	NM_012343	NAD(P) transhydrogenase, mitochondrial precursor (EC 1.6.1.2) (Pyridine nucleotide transhydrogenase) (Nicotinamide nucleotide transhydrogenase).	chr5 43638581
NM_012458	NM_012458	Mitochondrial import inner membrane translocase subunit TIM13.	chr19 2376621
NM_012459	BC000711	Mitochondrial import inner membrane translocase subunit TIM8 B (Deafness dystonia protein 2) (DDP-like protein).	chr11 111461082
NM_012459	NM_012459	Mitochondrial import inner membrane translocase subunit TIM8 B (Deafness dystonia protein 2) (DDP-like protein).	chr11 111461081
NM_012460	NM_012460	Mitochondrial import inner membrane translocase subunit TIM9 A.	chr14 57945123
NM_012473	AK123361	Hypothetical protein FLJ41367.	chr22 35193041
NM_012473	NM_012473	Thioredoxin, mitochondrial precursor (Mt-Trx) (MTRX) (Thioredoxin-2).	chr22 35193038
NM_013267	NM_013267	Glutaminase liver isoform, mitochondrial precursor (EC 3.5.1.2) (GLS) (L-glutamine amidohydrolase) (L-glutaminase).	chr12 55151003
NM_013267	NM_138566	GLS2 protein.	chr12 55151003
NM_013386	BC068561	SLC25A24 protein.	chr1 108478971
NM_013386	BC068561	Solute carrier family 25 member 24, isoform 1.	chr1 108478971
NM_013386	NM_013386	Solute carrier family 25 member 24, isoform 1 (Solute carrier family 25 (Mitochondrial carrier; phosphate carrier), member 24) (Small calcium-binding mitochondrial carrier 1).	chr1 108478971
NM_013386	NM_213651	Solute carrier family 25 (Mitochondrial carrier; phosphate carrier), member 24 (Fragment).	chr1 108478971
NM_013391	NM_013391	Dimethylglycine dehydrogenase, mitochondrial precursor (EC 1.5.99.2) (ME2GLYDH).	chr5 78329185
NM_013417	BC065552	IARS protein.	chr9 94012445
NM_013417	D28473	Hypothetical protein DKFZp686L17145.	chr9 94012445
NM_013417	D28473	IARS protein.	chr9 94012445
NM_013417	D28473	Isoleucyl-tRNA synthetase, cytoplasmic (EC 6.1.1.5) (Isoleucine--tRNA ligase) (IleRS) (IRS).	chr9 94012445
NM_013417	D28473	PRO0785.	chr9 94012445
NM_013417	NM_013417	Isoleucyl-tRNA synthetase, cytoplasmic (EC 6.1.1.5) (Isoleucine--tRNA ligase) (IleRS) (IRS).	chr9 94012445
NM_013442	AK130546	Stomatin (EPB72)-like 2.	chr9 35089890
NM_013442	AK130546	Stomatin-like protein 2 (SLP-2) (EPB72-like 2).	chr9 35089890
NM_013442	NM_013442	Stomatin-like protein 2 (SLP-2) (EPB72-like 2).	chr9 35089892
NM_014018	NM_014018	Mitochondrial 28S ribosomal protein S28 (S28mt) (MRP-S28) (MRP-S35).	chr8 80993650
NM_014046	AL050361	Mitochondrial ribosomal protein S18B.	chr6 30693607
NM_014046	AL050361	Mitochondrial ribosomal protein S18B.	chr6_cox_hap1 2034188
NM_014046	AL050361	Mitochondrial ribosomal protein S18B.	chr6_qbl_hap2 1832482
NM_014046	NM_014046	28S ribosomal protein S18b, mitochondrial precursor (MRP-S18-b) (Mrps18b) (MRP-S18-2).	chr6 30693584
NM_014046	NM_014046	28S ribosomal protein S18b, mitochondrial precursor (MRP-S18-b) (Mrps18b) (MRP-S18-2).	chr6_cox_hap1 2034165
NM_014046	NM_014046	28S ribosomal protein S18b, mitochondrial precursor (MRP-S18-b) (Mrps18b) (MRP-S18-2).	chr6_qbl_hap2 1832459
NM_014049	BC007970	Hypothetical protein FLJ12506.	chr3 130081143
NM_014049	NM_014049	Acyl-CoA dehydrogenase family member 9, mitochondrial precursor (EC 1.3.99.-) (ACAD-9).	chr3 130081143
NM_014078	NM_014078	39S ribosomal protein L13, mitochondrial (L13mt) (MRP-L13).	chr8 121477264
NM_014160	CR610136	Makorin-2 (RING finger protein 62).	chr3 12573595
NM_014160	NM_014160	Makorin-2 (RING finger protein 62).	chr3 12573593
NM_014161	NM_014161	39S ribosomal protein L18, mitochondrial precursor (L18mt) (MRP-L18).	chr6 160131487
NM_014175	NM_014175	Mitochondrial ribosomal protein L15 (Fragment).	chr8 55210333
NM_014222	NM_014222	NADH-ubiquinone oxidoreductase 19 kDa subunit (EC 1.6.5.3) (EC 1.6.99.3) (Complex I-19KD) (CI-19KD) (Complex I-PGIV) (CI-PGIV).	chr9 123946160
NM_014231	NM_014231	Vesicle-associated membrane protein 1 (VAMP-1) (Synaptobrevin-1).	chr12 6441666
NM_014231	NM_016830	VAMP1 protein.	chr12 6441666
NM_014231	NM_199245	Vesicle-associated membrane protein 1, isoform 2 (Hypothetical protein DKFZp686H12131).	chr12 6441666
NM_014234	NM_014234	Estradiol 17-beta-dehydrogenase 8 (EC 1.1.1.62) (17-beta-HSD 8) (17- beta-hydroxysteroid dehydrogenase 8) (Protein Ke6) (Ke-6).	chr6 33280396
NM_014234	NM_014234	Estradiol 17-beta-dehydrogenase 8 (EC 1.1.1.62) (17-beta-HSD 8) (17- beta-hydroxysteroid dehydrogenase 8) (Protein Ke6) (Ke-6).	chr6_cox_hap1 4552579
NM_014234	NM_014234	Estradiol 17-beta-dehydrogenase 8 (EC 1.1.1.62) (17-beta-HSD 8) (17- beta-hydroxysteroid dehydrogenase 8) (Protein Ke6) (Ke-6).	chr6_qbl_hap2 4358588
NM_014251	AJ496569	Calcium-binding mitochondrial carrier protein Aralar2 (Mitochondrial aspartate glutamate carrier 2) (Solute carrier family 25 member 13) (Citrin).	chr7 95587468
NM_014251	NM_014251	Calcium-binding mitochondrial carrier protein Aralar2 (Mitochondrial aspartate glutamate carrier 2) (Solute carrier family 25 member 13) (Citrin).	chr7 95587468
NM_014263	NM_014263	YME1-like 1 (S. cerevisiae) (Fragment).	chr10 27439390
NM_014263	NM_139312	ATP-dependent metalloprotease YME1L1 (EC 3.4.24.-) (YME1-like protein 1) (ATP-dependent metalloprotease FtsH1) (Meg-4) (Presenilin- associated metalloprotease) (PAMP).	chr10 27439390
NM_014291	AK123190	2-amino-3-ketobutyrate coenzyme A ligase, mitochondrial precursor (EC 2.3.1.29) (AKB ligase) (Glycine acetyltransferase).	chr22 36533890
NM_014291	NM_014291	2-amino-3-ketobutyrate coenzyme A ligase, mitochondrial precursor (EC 2.3.1.29) (AKB ligase) (Glycine acetyltransferase).	chr22 36533900
NM_014297	NM_014297	ETHE1 protein, mitochondrial precursor (EC 3.-.-.-) (Ethylmalonic encephalopathy protein 1) (Hepatoma subtracted clone one protein).	chr19 48702711
NM_014324	NM_014324	Alpha-methylacyl-CoA racemase (EC 5.1.99.4) (2-methylacyl-CoA racemase).	chr5 34023662
NM_014324	NM_203382	Alpha-methylacyl-CoA racemase, isoform 2.	chr5 34023662
NM_014341	AF192559	MTCH1 protein (Fragment).	chr6 37043895
NM_014341	BC110914	MTCH1.	chr6 37043895
NM_014341	CR617013	MTCH1.	chr6 37043914
NM_014341	CR617013	Presenilin-associated protein.	chr6 37043914
NM_014341	NM_014341	MTCH1 protein (Fragment).	chr6 37043895
NM_014342	NM_014342	Mitochondrial carrier homolog 2 (Met-induced mitochondrial protein).	chr11 47595443
NM_014362	NM_014362	Hypothetical protein HIBCH (Fragment).	chr2 190777604
NM_014362	NM_198047	Hypothetical protein HIBCH (Fragment).	chr2 190777604
NM_014365	NM_014365	Heat-shock protein beta-8 (HspB8) (Alpha crystallin C chain) (Small stress protein-like protein HSP22) (E2-induced gene 1 protein) (Protein kinase H11).	chr12 118100977
NM_014367	AF250321	Putative FWP002.	chr3 123585731
NM_014367	NM_014367	Putative FWP002.	chr3 123585712
NM_014384	AK074640	Hypothetical protein FLJ90159.	chr11 133628664
NM_014384	AK125373	Hypothetical protein FLJ43383.	chr11 133628672
NM_014384	NM_014384	Acyl-CoA dehydrogenase family member 8, mitochondrial precursor (EC 1.3.99.-) (ACAD-8) (Isobutyryl-CoA dehydrogenase) (Activator- recruited cofactor 42 kDa component) (ARC42).	chr11 133628616
NM_014402	NM_014402	Ubiquinol-cytochrome c reductase complex ubiquinone-binding protein QP-C (EC 1.10.2.2) (Ubiquinol-cytochrome c reductase complex 9.5 kDa protein) (Complex III subunit VII).	chr5 132230217
NM_014424	AK092275	Hypothetical protein FLJ34956 (Heat shock 27kDa protein family, member 7) (Cardiovascular).	chr1 16213113
NM_014424	BC006319	Heat shock 27kDa protein family, member 7 (Cardiovascular).	chr1 16213111
NM_014424	CR749298	Heat-shock protein beta-7 (HspB7) (Cardiovascular heat shock protein) (cvHsp).	chr1 16213109
NM_014424	CR749419	Heat-shock protein beta-7 (HspB7) (Cardiovascular heat shock protein) (cvHsp).	chr1 16213111
NM_014424	NM_014424	Heat-shock protein beta-7 (HspB7) (Cardiovascular heat shock protein) (cvHsp).	chr1 16213111
NM_014566	NM_014566	Olfactory receptor 1D5 (Olfactory receptor 17-31) (OR17-31).	chr17 2912712
NM_014595	BC008183	n/a	chr17 70637918
NM_014595	NM_014595	5'(3')-deoxyribonucleotidase, cytosolic type (EC 3.1.3.-) (Cytosolic 5',3'-pyrimidine nucleotidase) (Deoxy-5'-nucleotidase 1) (dNT-1).	chr17 70637918
NM_014625	BC029141	Nephrosis 2, idiopathic, steroid-resistant (Podocin).	chr1 177786299
NM_014625	NM_014625	Podocin.	chr1 177786298
NM_014633	NM_014633	KIAA0155 protein (Fragment).	chr11 10729386
NM_014746	NM_014746	Ubiquitin-conjugating enzyme 7-interacting protein 4 (UbcM4- interacting protein 4) (RING finger protein 144).	chr2 6974973
NM_014763	BC030144	39S ribosomal protein L19, mitochondrial precursor (L19mt) (MRP-L19) (MRP-L15).	chr2 75727431
NM_014763	NM_014763	39S ribosomal protein L19, mitochondrial precursor (L19mt) (MRP-L19) (MRP-L15).	chr2 75727419
NM_014765	NM_014765	Mitochondrial import receptor subunit TOM20 homolog (Mitochondrial 20 kDa outer membrane protein) (Outer mitochondrial membrane receptor Tom20).	chr1 233339282
NM_014820	NM_014820	Mitochondrial precursor proteins import receptor (Translocase of outer membrane TOM70).	chr3 101564998
NM_014874	NM_014874	Transmembrane GTPase MFN2 (EC 3.6.5.-) (Mitofusin-2).	chr1 11962955
NM_014905	AF158555	Hypothetical protein GLS (Fragment).	chr2 191453805
NM_014905	NM_014905	Glutaminase kidney isoform, mitochondrial precursor (EC 3.5.1.2) (GLS) (L-glutamine amidohydrolase) (K-glutaminase).	chr2 191453846
NM_014924	NM_014924	Protein KIAA0831.	chr14 54902862
NM_015058	AB011136	OTTHUMP00000018323.	chr13 41038972
NM_015058	NM_015058	KIAA0564 protein (Fragment).	chr13 41038961
NM_015074	NM_015074	Kinesin-like protein KIF1B (Klp).	chr1 10193417
NM_015074	NM_183416	Kinesin family member 1B.	chr1 10193417
NM_015084	BC064902	MRPS27 protein.	chr5 71551111
NM_015084	NM_015084	Mitochondrial 28S ribosomal protein S27 (S27mt) (MRP-S27).	chr5 71551111
NM_015160	NM_015160	Mitochondrial processing peptidase alpha subunit, mitochondrial precursor (EC 3.4.24.64) (Alpha-MPP) (P-55) (HA1523).	chr9 138424936
NM_015232	NM_015232	KIAA1110 protein (Fragment).	chr12 56802
NM_015340	NM_015340	Probable leucyl-tRNA synthetase, mitochondrial precursor (EC 6.1.1.4) (Leucine--tRNA ligase) (LeuRS).	chr3 45405078
NM_015367	NM_015367	Bcl-2-like 13 protein (Mil1 protein) (Bcl-rambo).	chr22 16501484
NM_015394	NM_015394	Zinc finger protein 10 (Zinc finger protein KOX1).	chr12 132217286
NM_015458	NM_015458	Myotubularin-related protein 9.	chr8 11179409
NM_015488	BC021118	FKSG19 (Myofibrillogenesis regulator MR-1) (Trans-activated by hepatitis C virus core protein 2) (Hypothetical protein DKFZp564N1362).	chr2 218843471
NM_015488	NM_015488	Myofibrillogenesis regulator 1, isoform 1.	chr2 218843459
NM_015523	AF151872	REXO2 protein.	chr11 113815361
NM_015523	BC003502	REXO2 protein.	chr11 113815415
NM_015523	BC107887	n/a	chr11 113815411
NM_015523	NM_015523	Oligoribonuclease, mitochondrial precursor (EC 3.1.-.-) (Small fragment nuclease) (RNA exonuclease 2 homolog).	chr11 113815386
NM_015560	NM_015560	Dynamin-like 120 kDa protein, mitochondrial precursor (Optic atrophy 1 gene protein).	chr3 194793805
NM_015560	NM_130831	OPA1 protein.	chr3 194793805
NM_015560	NM_130832	OPA1 protein.	chr3 194793805
NM_015560	NM_130833	OPA1 protein.	chr3 194793805
NM_015560	NM_130834	Dynamin-like 120 kDa protein, mitochondrial precursor (Optic atrophy 1 gene protein).	chr3 194793805
NM_015560	NM_130835	OPA1 protein.	chr3 194793805
NM_015560	NM_130836	Dynamin-like 120 kDa protein, mitochondrial precursor (Optic atrophy 1 gene protein).	chr3 194793805
NM_015560	NM_130837	Dynamin-like 120 kDa protein, mitochondrial precursor (Optic atrophy 1 gene protein).	chr3 194793805
NM_015666	NM_015666	Putative GTP-binding protein 5.	chr20 60201647
NM_015697	BC020728	COQ2 protein.	chr4 84404003
NM_015697	NM_015697	Para-hydroxybenzoate--polyprenyltransferase, mitochondrial (EC 2.5.1.-).	chr4 84404013
NM_015836	NM_015836	Tryptophanyl-tRNA synthetase, mitochondrial precursor (EC 6.1.1.2) (Tryptophan--tRNA ligase) (TrpRS) ((Mt)TrpRS).	chr1 119375363
NM_015836	NM_201263	Tryptophanyl tRNA synthetase 2 (Mitochondrial).	chr1 119375363
NM_015904	NM_015904	Eukaryotic translation initiation factor 5B (eIF-5B) (Translation initiation factor IF-2).	chr2 99320265
NM_015907	NM_015907	Cytosol aminopeptidase (EC 3.4.11.1) (Leucine aminopeptidase) (LAP) (Leucyl aminopeptidase) (Proline aminopeptidase) (EC 3.4.11.5) (Prolyl aminopeptidase) (Peptidase S).	chr4 17188024
NM_015917	BC063425	Glutathione S-transferase kappa 1 (EC 2.5.1.18) (GST 13-13) (Glutathione S-transferase subunit 13) (GST class-kappa) (GSTK1-1) (hGSTK1).	chr7 142670714
NM_015917	NM_015917	Glutathione S-transferase kappa 1 (EC 2.5.1.18) (GST 13-13) (Glutathione S-transferase subunit 13) (GST class-kappa) (GSTK1-1) (hGSTK1).	chr7 142670685
NM_015942	AF132946	CGI-12 protein.	chr8 97320827
NM_015942	NM_015942	Hypothetical protein MTERFD1.	chr8 97320820
NM_015950	NM_015950	Mitochondrial ribosomal protein L2.	chr6 43129744
NM_015956	NM_015956	Mitochondrial ribosomal protein L4, isoform a (L4mt).	chr19 10223639
NM_015956	NM_146388	Mitochondrial ribosomal protein L4, isoform b.	chr19 10223639
NM_015969	NM_015969	28S ribosomal protein S17, mitochondrial precursor (S17mt) (MRP-S17).	chr7 55987104
NM_015971	NM_015971	30S ribosomal protein S7 homolog (Mitochondrial ribosomal protein S7).	chr17 70769384
NM_016009	NM_016009	SH3 domain GRB2-like protein B1 (EC 2.3.1.-) (Endophilin B1) (Bax- interacting factor 1) (Bif-1).	chr1 86943091
NM_016013	NM_016013	Complex I intermediate-associated protein 30, mitochondrial precursor.	chr15 39466844
NM_016020	NM_016020	CGI-75 protein.	chr6 155620489
NM_016027	NM_016027	CGI-83 protein (Lactamase, beta 2).	chr8 71712045
NM_016034	NM_016034	Mitochondrial 28S ribosomal protein S2 (S2mt) (MRP-S2).	chr9 137532374
NM_016035	NM_016035	Ubiquinone biosynthesis protein COQ4 homolog (Coenzyme Q biosynthesis protein 4 homolog).	chr9 130124635
NM_016047	NM_016047	Pre-mRNA branch site protein p14 (SF3B 14 kDa subunit).	chr2 24143958
NM_016050	NM_016050	39S ribosomal protein L11, mitochondrial precursor (L11mt) (MRP-L11).	chr11 65959881
NM_016050	NM_170738	Mitochondrial ribosomal protein L11, isoform b.	chr11 65959881
NM_016050	NM_170739	39S ribosomal protein L11, mitochondrial precursor (L11mt) (MRP-L11).	chr11 65959881
NM_016065	NM_016065	28S ribosomal protein S16, mitochondrial precursor (S16mt) (MRP-S16).	chr10 74678608
NM_016067	NM_016067	28S ribosomal protein S18c, mitochondrial precursor (MRP-S18-c) (Mrps18c) (MRP-S18-1).	chr4 84596195
NM_016068	NM_016068	Tetratricopeptide repeat protein 11 (TPR repeat protein 11) (Fis1 homolog).	chr7 100669614
NM_016069	NM_016069	Mitochondrial import inner membrane translocase subunit TIM16 (Mitochondria-associated granulocyte macrophage CSF signaling molecule).	chr16 4330253
NM_016070	NM_016070	Mitochondrial ribosomal protein S23 (S23mt) (MRP-S23).	chr17 53271842
NM_016071	NM_016071	Mitochondrial 28S ribosomal protein S33 (S33mt) (MRP-S33).	chr7 140352430
NM_016082	AK222745	CDK5 regulatory subunit-associated protein 1 (CDK5 activator-binding protein C42).	chr20 31410305
NM_016082	AK222745	n/a	chr20 31410305
NM_016082	BC001215	CDK5 regulatory subunit associated protein 1.	chr20 31410313
NM_016082	NM_016082	CDK5 regulatory subunit associated protein 1 (Fragment).	chr20 31410305
NM_016082	NM_016408	CDK5 regulatory subunit-associated protein 1 (CDK5 activator-binding protein C42).	chr20 31410305
NM_016138	NM_016138	Ubiquinone biosynthesis protein COQ7 homolog (Coenzyme Q biosynthesis protein 7 homolog) (Timing protein clk-1 homolog).	chr16 18986427
NM_016139	NM_016139	Coiled-coil-helix-coiled-coil-helix domain containing protein 2 (HCV NS2 trans-regulated protein) (NS2TP).	chr7 56136761
NM_016173	NM_016173	HemK methyltransferase family member 1 (EC 2.1.1.-) (M.HsaHemKP).	chr3 50581912
NM_016234	NM_016234	Long-chain-fatty-acid--CoA ligase 5 (EC 6.2.1.3) (Long-chain acyl-CoA synthetase 5) (LACS 5).	chr10 114125945
NM_016282	NM_016282	GTP:AMP phosphotransferase mitochondrial (EC 2.7.4.10) (AK3) (Adenylate kinase 3 alpha-like 1).	chr9 4701157
NM_016292	BC018950	TNF receptor-associated protein 1.	chr16 3648045
NM_016292	NM_016292	Heat shock protein 75 kDa, mitochondrial precursor (HSP 75) (Tumor necrosis factor type 1 receptor associated protein) (TRAP-1) (TNFR- associated protein 1).	chr16 3648039
NM_016308	BC014961	UMP-CMP kinase (EC 2.7.4.14) (Cytidylate kinase) (Deoxycytidylate kinase) (Cytidine monophosphate kinase) (Uridine monophosphate/cytidine monophosphate kinase) (UMP/CMP kinase) (UMP/CMPK) (Uridine monophosphate kinase).	chr1 47572202
NM_016308	NM_016308	UMP-CMP kinase (EC 2.7.4.14) (Cytidylate kinase) (Deoxycytidylate kinase) (Cytidine monophosphate kinase) (Uridine monophosphate/cytidine monophosphate kinase) (UMP/CMP kinase) (UMP/CMPK) (Uridine monophosphate kinase).	chr1 47572174
NM_016311	BC009677	ATPIF1 protein.	chr1 28435230
NM_016311	NM_016311	ATPase inhibitor, mitochondrial precursor.	chr1 28435197
NM_016335	NM_016335	Proline oxidase, mitochondrial precursor (EC 1.5.3.-) (Proline dehydrogenase).	chr22 17280294
NM_016350	AY736182	Ninein (hNinein).	chr14 50262341
NM_016350	BC090932	NIN protein.	chr14 50262298
NM_016350	NM_016350	n/a	chr14 50262298
NM_016350	NM_182945	n/a	chr14 50262298
NM_016350	NM_182946	Ninein (hNinein).	chr14 50262298
NM_016360	AK094052	UPF0082 protein PRO0477.	chr17 59031972
NM_016360	NM_016360	UPF0082 protein PRO0477.	chr17 59031974
NM_016361	AB031478	Lysophosphatidic acid phosphatase type 6 precursor (EC 3.1.3.2) (Acid phosphatase 6, lysophosphatidic) (Acid phosphatase-like protein 1) (PACPL1).	chr1 145585797
NM_016361	AB209248	n/a	chr1 145585793
NM_016361	NM_016361	Lysophosphatidic acid phosphatase type 6 precursor (EC 3.1.3.2) (Acid phosphatase 6, lysophosphatidic) (Acid phosphatase-like protein 1) (PACPL1).	chr1 145585791
NM_016462	NM_016462	Transmembrane protein 14C.	chr6 10831323
NM_016487	NM_016487	Protein C6orf203.	chr6 107456109
NM_016491	NM_016491	Mitochondrial ribosomal protein L37.	chr1 54438427
NM_016497	NM_016497	Mitochondrial ribosomal protein bMRP64 (Mitochondrial ribosomal protein L51) (CDA09).	chr12 6471578
NM_016498	NM_016498	Mitochondrial 18 kDa protein (MTP18).	chr22 29151719
NM_016503	NM_016503	HSPC249.	chr2 99164009
NM_016503	NM_145212	Mitochondrial ribosomal protein L30, isoform a (Hypothetical protein MRPL30).	chr2 99164009
NM_016504	NM_016504	Mitochondrial 39S ribosomal protein L27 (L27mt) (MRP-L27).	chr17 45800227
NM_016538	AK002027	NAD-dependent deacetylase sirtuin-7 (EC 3.5.1.-) (SIR2-like protein 7).	chr17 77463106
NM_016538	AK131437	CDNA FLJ16567 fis, clone TBAES2000932, highly similar to Homo sapiens sirtuin 7 (SIRT7).	chr17 77463106
NM_016538	AK131484	Hypothetical protein FLJ16662.	chr17 77463106
NM_016538	NM_016538	NAD-dependent deacetylase sirtuin-7 (EC 3.5.1.-) (SIR2-like protein 7).	chr17 77463106
NM_016576	BC003053	Full-length cDNA clone CS0DL005YG10 of B cells (Ramos cell line) of Homo sapiens (human).	chr14 23771968
NM_016576	BC003053	GMP reductase 2 (EC 1.7.1.7) (Guanosine 5'-monophosphate oxidoreductase 2) (Guanosine monophosphate reductase 2).	chr14 23771968
NM_016576	BC008021	Full-length cDNA clone CS0DL005YG10 of B cells (Ramos cell line) of Homo sapiens (human).	chr14 23771969
NM_016576	BX247993	Full-length cDNA clone CS0DL005YG10 of B cells (Ramos cell line) of Homo sapiens (human).	chr14 23771994
NM_016576	NM_016576	GMP reductase 2 (EC 1.7.1.7) (Guanosine 5'-monophosphate oxidoreductase 2) (Guanosine monophosphate reductase 2).	chr14 23771942
NM_016581	BC008279	SITPEC protein.	chr19 11477744
NM_016581	NM_016581	SITPEC protein.	chr19 11477744
NM_016589	NM_016589	Hypothetical protein DKFZp564B172 (M5-14 protein) (C3orf1 protein).	chr3 120700057
NM_016610	BC101076	CDNA FLJ90636 fis, clone PLACE1003737, highly similar to Toll-like receptor 8.	chrX 12834692
NM_016610	NM_016610	Toll-like receptor 8 precursor.	chrX 12834678
NM_016610	NM_138636	Toll-like receptor 8 precursor.	chrX 12834678
NM_016622	NM_016622	39S ribosomal protein L35, mitochondrial precursor (L35mt) (MRP-L35).	chr2 86280090
NM_016622	NM_145644	39S ribosomal protein L35, mitochondrial precursor (L35mt) (MRP-L35).	chr2 86280090
NM_016640	NM_016640	Mitochondrial 28S ribosomal protein S30 (S30mt) (MRP-S30) (Programmed cell death protein 9).	chr5 44844783
NM_017421	CR607786	OTTHUMP00000016893.	chr6 99924092
NM_017421	NM_017421	Hexaprenyldihydroxybenzoate methyltransferase, mitochondrial precursor (EC 2.1.1.114) (Dihydroxyhexaprenylbenzoate methyltransferase) (3,4- dihydroxy-5-hexaprenylbenzoate methyltransferase) (DHHB methyltransferase) (DHHB-MT) (DHHB-MTase).	chr6 99924072
NM_017446	AF239727	Mitochondrial 39S ribosomal protein L39 (L39mt) (MRP-L39) (MRP-L5).	chr21 25879840
NM_017446	AK000458	Mitochondrial 39S ribosomal protein L39 (L39mt) (MRP-L39) (MRP-L5).	chr21 25879842
NM_017446	NM_017446	Mitochondrial 39S ribosomal protein L39 (L39mt) (MRP-L39) (MRP-L5).	chr21 25879842
NM_017446	NM_080794	Mitochondrial 39S ribosomal protein L39 (L39mt) (MRP-L39) (MRP-L5).	chr21 25879842
NM_017547	NM_017547	H17 protein (Fragment).	chr11 125644264
NM_017646	AK000068	TRNA isopentenylpyrophosphate transferase isoform 7.	chr1 40079314
NM_017646	BC010741	TRNA isopentenylpyrophosphate transferase isoform 5.	chr1 40079313
NM_017646	BC010741	TRNA isopentenylpyrophosphate transferase isoform 7.	chr1 40079313
NM_017646	BC107569	TRNA isopentenylpyrophosphate transferase isoform 3.	chr1 40079311
NM_017646	NM_017646	tRNA isopentenyltransferase, mitochondrial precursor (EC 2.5.1.8) (Isopentenyl-diphosphate:tRNA isopentenyltransferase) (IPP transferase) (IPTase) (IPPT) (hGRO1).	chr1 40079314
NM_017722	BC018302	n/a	chr19 13076720
NM_017722	NM_017722	N(2),N(2)-dimethylguanosine tRNA methyltransferase (EC 2.1.1.32) (tRNA(guanine-26,N(2)-N(2)) methyltransferase) (tRNA 2,2- dimethylguanosine-26 methyltransferase) (tRNA(m(2,2)G26)dimethyltransferase).	chr19 13076715
NM_017774	BC064145	CDKAL1 protein.	chr6 20642690
NM_017774	NM_017774	Hypothetical protein FLJ20342.	chr6 20642735
NM_017812	CR592685	Coiled-coil-helix-coiled-coil-helix domain containing protein 3.	chr7 132120183
NM_017812	NM_017812	Coiled-coil-helix-coiled-coil-helix domain containing protein 3.	chr7 132120163
NM_017827	CR618695	Seryl-tRNA synthetase, mitochondrial precursor (EC 6.1.1.11) (Serine-- tRNA ligase) (SerRSmt).	chr19 44097778
NM_017827	NM_017827	Seryl-tRNA synthetase, mitochondrial precursor (EC 6.1.1.11) (Serine-- tRNA ligase) (SerRSmt).	chr19 44097746
NM_017829	NM_017829	n/a	chr22 15998410
NM_017829	NM_033070	Cat eye syndrome critical region protein 5 precursor.	chr22 15998410
NM_017840	BC019269	PNAS-111.	chr11 59330183
NM_017840	NM_017840	PNAS-111.	chr11 59330189
NM_017841	NM_017841	Hypothetical protein FLJ20487.	chr11 60954172
NM_017875	NM_017875	Hypothetical protein FLJ20551.	chr3 39399842
NM_017888	BC016703	FLJ20581 protein.	chr16 20328356
NM_017888	NM_017888	FLJ20581 protein.	chr16 20328356
NM_017909	BC106065	Chromosome 6 open reading frame 96.	chr6 151767698
NM_017909	NM_017909	Chromosome 6 open reading frame 96 (Fragment).	chr6 151767682
NM_017943	NM_017943	F-box only protein 34.	chr14 54807831
NM_017952	BC011832	Hypothetical protein DKFZp666K071 (Fragment).	chr2 86186880
NM_017952	NM_017952	Hypothetical protein DKFZp666K071 (Fragment).	chr2 86186848
NM_017964	BC066903	SLC30A6 protein.	chr2 32244436
NM_017964	NM_017964	SLC30A6 protein.	chr2 32244436
NM_017971	AK000886	Hypothetical protein FLJ10024.	chr1 1327155
NM_017971	NM_017971	Mitochondrial ribosomal protein L20 (L20mt) (MRPL20 protein). 50S ribosomal protein L20.	chr1 1327159
NM_017990	NM_017990	KIAA1990 protein (Fragment).	chr16 68705029
NM_018035	BC013323	FLJ10241 protein.	chr19 46629063
NM_018035	NM_018035	Hypothetical protein FLJ10241.	chr19 46629063
NM_018088	NM_018088	Hypothetical protein FLJ10408.	chr12 8265123
NM_018135	NM_018135	28S ribosomal protein S18a, mitochondrial precursor (MRP-S18-a) (Mrps18a) (MRP-S18-3).	chr6 43747019
NM_018141	NM_018141	Mitochondrial 28S ribosomal protein S10 (S10mt) (MRP-S10).	chr6 42282517
NM_018155	BC014064	Solute carrier family 25, member 36.	chr3 142143418
NM_018155	NM_018155	Hypothetical protein DKFZp434M1820 (Fragment).	chr3 142143377
NM_018173	NM_018173	Hypothetical protein FLJ10665.	chr12 6289862
NM_018196	NM_018196	Trimethyllysine dioxygenase, mitochondrial precursor (EC 1.14.11.8) (Epsilon-trimethyllysine 2-oxoglutarate dioxygenase) (TML-alpha- ketoglutarate dioxygenase) (TML hydroxylase) (TML dioxygenase) (TMLD).	chrX 154372966
NM_018244	AK022742	MSTP118.	chr20 33353796
NM_018244	AK093804	MSTP118.	chr20 33353796
NM_018244	BX537568	MSTP118.	chr20 33353796
NM_018244	NM_018244	Basic FGF-repressed Zic-binding protein (bFZb).	chr20 33353796
NM_018244	NM_199487	n/a	chr20 33353796
NM_018245	NM_018245	Hypothetical protein FLJ10851.	chr10 50612716
NM_018263	AB084281	Hypothetical protein KIAA1685.	chr2 25815763
NM_018263	AK001760	Hypothetical protein FLJ10898.	chr2 25815763
NM_018263	NM_018263	Hypothetical protein DKFZp686C1968.	chr2 25815763
NM_018281	BC044574	ECHDC2 protein.	chr1 53134492
NM_018281	BC044574	PP6 (ECHDC2 protein).	chr1 53134492
NM_018281	BX647186	Hypothetical protein FLJ45240.	chr1 53134484
NM_018281	NM_018281	Hypothetical protein FLJ10948.	chr1 53134492
NM_018292	AK022251	Glutaminyl-tRNA synthase (Glutamine-hydrolyzing)-like 1.	chr6 107184181
NM_018292	NM_018292	Hypothetical protein DKFZp564C1278.	chr6 107184145
NM_018373	NM_018373	Synaptojanin 2 binding protein (Mitochondrial outer membrane protein 25).	chr14 69908626
NM_018380	NM_018380	Probable ATP-dependent RNA helicase DDX28 (EC 3.6.1.-) (Mitochondrial DEAD box protein 28).	chr16 66612674
NM_018389	NM_018389	GDP-fucose transporter 1 (Solute carrier family 35 member C1).	chr11 45783911
NM_018397	NM_018397	Choline dehydrogenase, mitochondrial precursor (EC 1.1.99.1) (CHD) (CDH).	chr3 53826680
NM_018441	BC002529	n/a	chr2 216611379
NM_018441	NM_018441	Peroxisomal trans-2-enoyl-CoA reductase (EC 1.3.1.38) (TERP) (HPDHase) (pVI-ARL) (2,4-dienoyl-CoA reductase-related protein) (DCR-RP).	chr2 216611356
NM_018444	NM_018444	[Pyruvate dehydrogenase [Lipoamide]]-phosphatase 1, mitochondrial precursor (EC 3.1.3.43) (PDP 1) (Pyruvate dehydrogenase phosphatase, catalytic subunit 1) (PDPC 1) (Protein phosphatase 2C).	chr8 94998337
NM_018451	AL833182	Hypothetical protein DKFZp667E025.	chr13 24355177
NM_018451	NM_018451	Centromere protein J (Centrosomal P4.1-associated protein) (LAG-3- associated protein) (LYST-interacting protein 1).	chr13 24355171
NM_018464	NM_018464	Protein C10orf70.	chr10 59698920
NM_018473	NM_018473	Thioesterase superfamily member 2.	chr6 24775253
NM_018641	NM_018641	Carbohydrate sulfotransferase 12 (EC 2.8.2.5) (Chondroitin 4-O- sulfotransferase 2) (Chondroitin 4-sulfotransferase 2) (C4ST2) (C4ST- 2) (Sulfotransferase Hlo).	chr7 2409748
NM_018663	NM_018663	Peroxisomal membrane protein 2 (22 kDa peroxisomal membrane protein).	chr12 131774264
NM_018672	NM_018672	Hypothetical protein FLJ25441.	chr17 64754386
NM_018706	NM_018706	Dehydrogenase E1 and transketolase domain containing protein 1.	chr10 12150976
NM_018843	NM_018843	Mitochondrial carrier family protein (Hypothetical protein MCFP).	chr7 87303355
NM_018947	NM_018947	Cytochrome c.	chr7 25124801
NM_018963	NM_018963	WD repeat protein (Fragment).	chr21 39479273
NM_018997	NM_018997	Mitochondrial 28S ribosomal protein S21 (S21mt) (MRP-S21).	chr1 148532892
NM_019041	BC011873	Hypothetical protein FLJ14778.	chr6 153351362
NM_019041	BC014428	Mitochondrial translational release factor 1-like.	chr6 153351359
NM_019041	BC105973	MTRF1L protein.	chr6 153351362
NM_019041	NM_019041	Mitochondrial translational release factor 1-like (Fragment).	chr6 153351362
NM_019051	NM_019051	Mitochondrial ribosomal protein L50.	chr9 103192069
NM_019056	BC010665	NADH-ubiquinone oxidoreductase ESSS subunit, mitochondrial precursor (EC 1.6.5.3) (EC 1.6.99.3) (Complex I-ESSS) (CI-ESSS) (Neuronal protein 17.3) (p17.3) (Np17.3).	chrX 46886559
NM_019056	NM_019056	NADH-ubiquinone oxidoreductase ESSS subunit, mitochondrial precursor (EC 1.6.5.3) (EC 1.6.99.3) (Complex I-ESSS) (CI-ESSS) (Neuronal protein 17.3) (p17.3) (Np17.3).	chrX 46886562
NM_019059	NM_019059	Probable mitochondrial import receptor subunit TOM7 homolog (Translocase of outer membrane 7 kDa subunit homolog).	chr7 22818778
NM_019849	NM_019849	Asc-type amino acid transporter 1 (Asc-1).	chr19 38391410
NM_019887	NM_019887	Diablo homolog, mitochondrial precursor (Second mitochondria-derived activator of caspase) (Smac protein) (Direct IAP binding protein with low pI).	chr12 121258162
NM_019887	NM_138929	SMAC3.	chr12 121258162
NM_019887	NM_138930	Diablo, isoform 2.	chr12 121258162
NM_019893	AF449759	ASAH2 protein.	chr10 51617078
NM_019893	BC107105	ASAH2 protein.	chr10 51617076
NM_019893	NM_019893	N-acylsphingosine amidohydrolase (Non-lysosomal ceramidase) 2B.	chr10 51617078
NM_020151	NM_020151	StAR-related lipid transfer protein 7 (StARD7) (START domain- containing protein 7) (GTT1 protein).	chr2 96214331
NM_020166	BC004187	Hypothetical protein DKFZp686B20267.	chr3 184215701
NM_020166	NM_020166	Methylcrotonoyl-CoA carboxylase alpha chain, mitochondrial precursor (EC 6.4.1.4) (3-Methylcrotonyl-CoA carboxylase 1) (MCCase alpha subunit) (3-methylcrotonyl-CoA:carbon dioxide ligase alpha subunit) (3-Methylcrotonyl-CoA carboxylase biotin-containing su	chr3 184215701
NM_020181	NM_020181	Protein C14orf162 (Myelin proteolipid protein-like protein).	chr14 69106337
NM_020184	NM_020184	Hypothetical protein CNNM4.	chr2 96790606
NM_020186	NM_020186	ACN9 protein homolog, mitochondrial precursor.	chr7 96584955
NM_020191	AF063603	Mitochondrial 28S ribosomal protein S22 (S22mt) (MRP-S22).	chr3 140545553
NM_020191	AK075436	Mitochondrial 28S ribosomal protein S22 (S22mt) (MRP-S22).	chr3 140545558
NM_020191	CR624297	Mitochondrial 28S ribosomal protein S22 (S22mt) (MRP-S22).	chr3 140545558
NM_020191	NM_020191	Mitochondrial 28S ribosomal protein S22 (S22mt) (MRP-S22).	chr3 140545550
NM_020201	NM_020201	5'(3')-deoxyribonucleotidase, mitochondrial precursor (EC 3.1.3.-) (5',3'-nucleotidase, mitochondrial) (Deoxy-5'-nucleotidase 2) (dNT-2).	chr17 17147404
NM_020202	NM_020202	Nit protein 2 (Nitrilase family, member 2) (CUA002).	chr3 101536257
NM_020236	NM_020236	Hypothetical protein MRPL1 (Fragment).	chr4 79002924
NM_020243	NM_020243	Mitochondrial import receptor subunit TOM22 homolog (Translocase of outer membrane 22 kDa subunit homolog) (hTom22) (1C9-2).	chr22 37407899
NM_020247	BC005171	Chaperone, ABC1 activity of bc1 complex like (S. pombe).	chr1 225194611
NM_020247	BC005171	Hypothetical protein DKFZp686K23233 (Chaperone, ABC1 activity of bc1 complex like) (S. pombe).	chr1 225194611
NM_020247	BC005171	Hypothetical protein.	chr1 225194611
NM_020247	NM_020247	Chaperone-activity of bc1 complex-like, mitochondrial precursor (Chaperone-ABC1-like).	chr1 225194611
NM_020312	NM_020312	Hypothetical protein A-152E5.11 (Hypothetical protein C16orf49) (Chromosome 16 open reading frame 49).	chr16 56038902
NM_020320	BC022341	RARSL protein.	chr6 88280823
NM_020320	NM_020320	Arginyl-tRNA synthetase-like.	chr6 88280821
NM_020373	AK024010	Hypothetical protein DKFZp434P102.	chr12 5542086
NM_020373	NM_020373	Transmembrane protein 16B.	chr12 5542080
NM_020396	BC104442	Apoptosis regulator Bcl-B (Bcl-2-like 10 protein) (Bcl2-L-10) (Anti- apoptotic protein NrH).	chr15 50189119
NM_020396	NM_020396	Apoptosis regulator Bcl-B (Bcl-2-like 10 protein) (Bcl2-L-10) (Anti- apoptotic protein NrH).	chr15 50189115
NM_020408	NM_020408	Protein C6orf149.	chr6 5053652
NM_020409	BC032522	Nasopharyngeal carcinoma metastasis-related 1.	chr3 180788950
NM_020409	NM_020409	39S ribosomal protein L47, mitochondrial precursor (L47mt) (MRP-L47).	chr3 180788950
NM_020409	NM_177988	Nasopharyngeal carcinoma metastasis-related 1.	chr3 180788950
NM_020421	AK096919	Hypothetical protein.	chr14 77336234
NM_020421	NM_020421	AarF domain containing kinase 1.	chr14 77336226
NM_020466	NM_020466	Hypothetical protein DJ122O8.2.	chr6 90403139
NM_020634	NM_020634	Growth/differentiation factor 3 precursor (GDF-3).	chr12 7733648
NM_020644	BC040124	TMEM9B protein.	chr11 8925416
NM_020644	NM_020644	Protein C11orf15 precursor.	chr11 8925415
NM_020661	NM_020661	Activation-induced cytidine deaminase (EC 3.5.4.5) (Cytidine aminohydrolase).	chr12 8646028
NM_020662	BC069009	n/a	chr6 24511160
NM_020662	NM_020662	Magnesium transporter MRS2L, mitochondrial precursor (MRS2-like protein).	chr6 24511160
NM_020665	NM_020665	Collectrin (Transmembrane protein 27).	chrX 15555371
NM_020686	NM_020686	4-aminobutyrate aminotransferase, mitochondrial precursor (EC 2.6.1.19) ((S)-3-amino-2-methylpropionate transaminase) (EC 2.6.1.22) (Gamma-amino-N-butyrate transaminase) (GABA transaminase) (GABA aminotransferase) (GABA-AT) (GABA-T) (L-AIBAT).	chr16 8675945
NM_020726	BC001644	NLN protein.	chr5 65053840
NM_020726	NM_020726	Neurolysin, mitochondrial precursor (EC 3.4.24.16) (Neurotensin endopeptidase) (Mitochondrial oligopeptidase M) (Microsomal endopeptidase) (MEP).	chr5 65053840
NM_020738	AB033076	Hypothetical protein FLJ12811.	chr2 8786510
NM_020738	AB033076	Hypothetical protein FLJ13864.	chr2 8786510
NM_020738	NM_020738	Hypothetical protein DKFZp686H14204 (Fragment).	chr2 8786510
NM_020745	NM_020745	AARSL protein (Fragment).	chr6 44375161
NM_020786	NM_020786	[Pyruvate dehydrogenase [Lipoamide]]-phosphatase 2, mitochondrial precursor (EC 3.1.3.43) (PDP 2) (Pyruvate dehydrogenase phosphatase, catalytic subunit 2) (PDPC 2).	chr16 65471936
NM_020810	BC063551	TRMT5 protein.	chr14 60507921
NM_020810	NM_020810	TRNA-(N1G37) methyltransferase.	chr14 60507921
NM_020918	NM_020918	Glycerol-3-phosphate acyltransferase, mitochondrial precursor (EC 2.3.1.15) (GPAT).	chr10 113899611
NM_020921	NM_020921	n/a	chr14 50256231
NM_021004	AB045131	NADP(H)-dependent retinol dehydrogenase/reductase A1 like protein 1.	chr14 23492832
NM_021004	BC003019	NADP(H)-dependent retinol dehydrogenase/reductase A1 like protein 1.	chr14 23492835
NM_021004	DQ325464	NADP(H)-dependent retinol dehydrogenase/reductase A1 like protein 1.	chr14 23492818
NM_021004	NM_021004	Dehydrogenase/reductase SDR family member 4 (EC 1.1.1.184) (NADPH- dependent carbonyl reductase/NADP-retinol dehydrogenase) (CR) (PHCR) (Peroxisomal short-chain alcohol dehydrogenase) (NADPH-dependent retinol dehydrogenase/reductase) (NDRD) (SCAD-SRL) (hu	chr14 23492804
NM_021074	NM_021074	NADH-ubiquinone oxidoreductase 24 kDa subunit, mitochondrial precursor (EC 1.6.5.3) (EC 1.6.99.3).	chr18 9092724
NM_021100	NM_021100	Cysteine desulfurase, mitochondrial precursor (EC 2.8.1.7).	chr20 33720024
NM_021130	NM_021130	Peptidyl-prolyl cis-trans isomerase A (EC 5.2.1.8) (PPIase) (Rotamase) (Cyclophilin A) (Cyclosporin A-binding protein).	chr7 44802776
NM_021130	NM_203430	Peptidylprolyl isomerase A, isoform 2.	chr7 44802789
NM_021133	NM_021133	2-5A-dependent ribonuclease (EC 3.1.26.-) (2-5A-dependent RNase) (Ribonuclease L) (RNase L) (Ribonuclease 4).	chr1 180809394
NM_021195	NM_021195	Claudin-6 (Skullin 2).	chr16 3004714
NM_021199	BC016836	PRO1975.	chr15 43714574
NM_021199	NM_021199	Sulfide:quinone oxidoreductase, mitochondrial precursor (EC 1.-.-.-).	chr15 43714547
NM_021638	NM_021638	Actin filament associated protein variant (Fragment).	chr4 7811341
NM_021734	NM_021734	Mitochondrial deoxynucleotide carrier (Solute carrier family 25 member 19) (Mitochondrial uncoupling protein 1).	chr17 70780668
NM_021801	NM_021801	Matrix metalloproteinase-26 precursor (EC 3.4.24.-) (MMP-26) (Matrilysin-2) (Endometase).	chr11 4965999
NM_021821	AK075378	Hypothetical protein PSEC0068.	chr12 27755034
NM_021821	BC015862	Mitochondrial 28S ribosomal protein S28 (MRP-S28).	chr12 27755031
NM_021821	NM_021821	Mitochondrial 28S ribosomal protein S28 (MRP-S28).	chr12 27754995
NM_021825	BC107755	Hypothetical protein.	chr11 82650150
NM_021825	NM_021825	Hypothetical protein.	chr11 82650153
NM_021830	BX640829	Twinkle protein, mitochondrial precursor (EC 3.6.1.-) (T7 gp4-like protein with intramitochondrial nucleoid localization) (T7-like mitochondrial DNA helicase) (Progressive external ophthalmoplegia 1 protein).	chr10 102737301
NM_021830	NM_021830	Twinkle protein, mitochondrial precursor (EC 3.6.1.-) (T7 gp4-like protein with intramitochondrial nucleoid localization) (T7-like mitochondrial DNA helicase) (Progressive external ophthalmoplegia 1 protein).	chr10 102737301
NM_021914	NM_021914	Cofilin-2 (Cofilin, muscle isoform).	chr14 34249400
NM_021914	NM_138638	Cofilin-2 (Cofilin, muscle isoform).	chr14 34249400
NM_021927	NM_021927	Hypothetical protein FLJ13220.	chr4 44375239
NM_022061	NM_022061	Mitochondrial ribosomal protein L17 (Fragment).	chr11 6659455
NM_022100	NM_022100	Mitochondrial 28S ribosomal protein S14 (S14mt) (MRP-S14).	chr1 173249752
NM_022120	NM_022120	Succinyl-CoA:3-ketoacid-coenzyme A transferase 2, mitochondrial precursor (EC 2.8.3.5) (Testis-specific succinyl CoA:3-oxoacid CoA- transferase) (SCOT-t).	chr1 40007784
NM_022132	BC014897	n/a	chr5 70918870
NM_022132	BC014897	n/a	chr5_h2_hap1 1543933
NM_022132	NM_022132	Methylcrotonoyl-CoA carboxylase beta chain, mitochondrial precursor (EC 6.4.1.4) (3-Methylcrotonyl-CoA carboxylase 2) (MCCase beta subunit) (3-methylcrotonyl-CoA:carbon dioxide ligase beta subunit) (3- Methylcrotonyl-CoA carboxylase non-biotin-containing	chr5 70918909
NM_022132	NM_022132	Methylcrotonoyl-CoA carboxylase beta chain, mitochondrial precursor (EC 6.4.1.4) (3-Methylcrotonyl-CoA carboxylase 2) (MCCase beta subunit) (3-methylcrotonyl-CoA:carbon dioxide ligase beta subunit) (3- Methylcrotonyl-CoA carboxylase non-biotin-containing	chr5_h2_hap1 1543972
NM_022156	BC062566	PP3111.	chr17 77609036
NM_022156	NM_022156	PP3111 protein (DUS1L protein).	chr17 77609040
NM_022163	AF205435	39S ribosomal protein L46, mitochondrial precursor (L46mt) (MRP-L46) (P2ECSL).	chr15 86803712
NM_022163	CR609481	39S ribosomal protein L46, mitochondrial precursor (L46mt) (MRP-L46) (P2ECSL).	chr15 86803743
NM_022163	NM_022163	39S ribosomal protein L46, mitochondrial precursor (L46mt) (MRP-L46) (P2ECSL).	chr15 86803713
NM_022341	NM_022341	Peptide deformylase, mitochondrial precursor (EC 3.5.1.88) (PDF) (Polypeptide deformylase).	chr16 67920024
NM_022341	NM_032382	Conserved oligomeric Golgi complex component 8.	chr16 67920024
NM_022366	AK026314	Hypothetical protein FLJ22661.	chr1 244770490
NM_022366	NM_022366	Hypothetical protein FLJ23182 (NS5ATP5) (Transcription factor B2, mitochondrial).	chr1 244770490
NM_022449	BC050426	RAB17 protein.	chr2 238147707
NM_022449	NM_022449	Ras-related protein Rab-17.	chr2 238147703
NM_022497	NM_022497	Mitochondrial 28S ribosomal protein S25 (S25mt) (MRP-S25).	chr3 15065023
NM_022570	CR749536	Hypothetical protein DKFZp686L24211.	chr12 10160648
NM_022570	NM_022570	Lectin-like receptor 1C.	chr12 10160648
NM_022570	NM_197947	Beta-glucan receptor isoform C.	chr12 10160648
NM_022570	NM_197948	Beta-glucan receptor isoform C.	chr12 10160648
NM_022570	NM_197949	Lectin-like receptor 1C.	chr12 10160648
NM_022570	NM_197950	Beta-glucan receptor isoform F.	chr12 10160648
NM_022570	NM_197951	Beta-glucan receptor isoform F.	chr12 10160648
NM_022570	NM_197952	Beta-glucan receptor isoform C.	chr12 10160648
NM_022570	NM_197953	Beta-glucan receptor isoform H.	chr12 10160648
NM_022745	NM_022745	Hypothetical protein FLJ22351 (ATP synthase mitochondrial F1 complex assembly factor 1).	chr1 46873299
NM_022754	NM_022754	Sideroflexin-1 (Tricarboxylate carrier protein) (TCC).	chr5 174838188
NM_022839	NM_022839	28S ribosomal protein S11, mitochondrial precursor (S11mt) (MRP-S11) (Cervical cancer proto-oncogene 2) (HCC-2).	chr15 86811687
NM_022839	NM_176805	n/a	chr15 86811687
NM_022915	NM_022915	39S ribosomal protein L44, mitochondrial precursor (EC 3.1.26.-) (L44mt) (MRP-L44).	chr2 224530377
NM_023936	CR594183	Mitochondrial 28S ribosomal protein S34 (S34mt) (MRP-S34).	chr16 1761901
NM_023936	NM_023936	Mitochondrial 28S ribosomal protein S34 (S34mt) (MRP-S34).	chr16 1761897
NM_023937	NM_023937	39S ribosomal protein L34, mitochondrial precursor (L34mt) (MRP-L34).	chr19 17277476
NM_024047	NM_024047	ADP-ribose pyrophosphatase, mitochondrial precursor (EC 3.6.1.13) (ADP-ribose diphosphatase) (Adenosine diphosphoribose pyrophosphatase) (ADPR-PPase) (ADP-ribose phosphohydrolase) (Nucleoside diphosphate- linked moiety X motif 9) (Nudix motif 9).	chr4 88562758
NM_024047	NM_198038	Putative nudix hydrolyase (EC 3.6.1.-).	chr4 88562758
NM_024067	NM_024067	Protein C7orf26.	chr7 6596439
NM_024091	NM_024091	MGC5297 protein (Fragment).	chr5 7912272
NM_024103	AJ619962	Hypothetical protein FLJ30339.	chr19 6391074
NM_024103	AJ619962	Hypothetical protein FLJ90098.	chr19 6391074
NM_024103	NM_024103	Mitochondrial ATP-Mg/Pi carrier (Mitochondrial Ca2+-dependent solute carrier protein 2) (Small calcium-binding mitochondrial carrier 3).	chr19 6391074
NM_024120	BC073158	C20orf7 protein (Chromosome 20 open reading frame 7).	chr20 13713694
NM_024120	BC073158	Hypothetical protein FLJ22324 (C20orf7 protein).	chr20 13713694
NM_024120	NM_024120	Chromosome 20 open reading frame 7.	chr20 13713694
NM_024122	NM_024122	Hypothetical protein MGC4825 (FKVI1866).	chrX 23761397
NM_024419	NM_024419	Hypothetical protein.	chr17 73886329
NM_024537	AB062436	OK/SW-CL.10.	chr13 110091766
NM_024537	NM_024537	Hypothetical protein FLJ12118 (OTTHUMP00000018707).	chr13 110091759
NM_024544	NM_024544	Hypothetical protein FLJ12875.	chr1 20698529
NM_024560	AX764480	Hypothetical protein FLJ90457.	chr12 79995966
NM_024560	BC015769	Hypothetical protein FLJ90457.	chr12 79995939
NM_024560	NM_024560	Hypothetical protein FLJ21963.	chr12 79995939
NM_024617	AL832026	OTTHUMP00000021598.	chr9 88092467
NM_024617	CR933644	Zinc finger CCHC domain containing protein 6.	chr9 88092469
NM_024617	NM_024617	Zinc finger CCHC domain containing protein 6.	chr9 88092469
NM_024678	BC007800	Hypothetical protein FLJ23441.	chr11 77824890
NM_024678	NM_024678	Hypothetical protein FLJ23441.	chr11 77824890
NM_024693	NM_024693	Hypothetical protein.	chr10 11824388
NM_024710	AK097280	Hypothetical protein FLJ39961.	chr19 60656167
NM_024710	BC017344	ISOC2 protein.	chr19 60656167
NM_024710	NM_024710	ISOC2 protein.	chr19 60656167
NM_024718	NM_024718	OTTHUMP00000022614.	chr9 138822194
NM_024754	NM_024754	Pentatricopeptide repeat domain 2.	chr5 71651973
NM_024758	NM_024758	Agmatinase, mitochondrial precursor (EC 3.5.3.11) (Agmatine ureohydrolase) (AUH).	chr1 15771738
NM_024838	BC035132	Hypothetical protein FLJ22002 (THNSL1 protein).	chr10 25345592
NM_024838	BC035132	Hypothetical protein FLJ37043.	chr10 25345592
NM_024838	NM_024838	Threonine synthase-like 1.	chr10 25345592
NM_024843	AK128495	Hypothetical protein FLJ46645.	chr2 172087232
NM_024843	NM_024843	Hypothetical protein DKFZp564E227.	chr2 172087232
NM_024876	BC027473	ADCK4 protein.	chr19 45889274
NM_024876	NM_024876	ADCK4 protein.	chr19 45889273
NM_025076	AK075170	UDP-glucuronic acid decarboxylase 1 (EC 4.1.1.35) (UDP-glucuronate decarboxylase 1) (UXS-1).	chr2 106076202
NM_025076	BC009819	n/a	chr2 106076202
NM_025076	NM_025076	UDP-glucuronic acid decarboxylase 1 (EC 4.1.1.35) (UDP-glucuronate decarboxylase 1) (UXS-1).	chr2 106076191
NM_025147	NM_025147	Hypothetical protein FLJ13448.	chr2 198026475
NM_025149	NM_025149	Hypothetical protein FLJ20920.	chr17 45858597
NM_025196	NM_025196	GrpE protein homolog 1, mitochondrial precursor (Mt-GrpE#1) (HMGE).	chr4 7112680
NM_025239	NM_025239	Programmed cell death 1 ligand 2 precursor (Programmed death ligand 2) (PD-L2) (PD-1-ligand 2) (PDCD1 ligand 2) (Butyrophilin B7-DC) (B7-DC) (CD273 antigen).	chr9 5500569
NM_030631	NM_030631	Mitochondrial 2-oxodicarboxylate carrier.	chr14 36218828
NM_030772	NM_030772	Gap junction alpha-10 protein (Connexin-59) (Cx59) (Connexin-58) (Cx58).	chr1 39112325
NM_030780	NM_030780	Mitochondrial folate transporter/carrier.	chr8 104480042
NM_030924	AJ577571	Bubblegum related protein.	chr19 6086695
NM_030924	BC090046	Bubblegum related protein.	chr19 6086727
NM_030924	BC090046	Hypothetical protein FLJ32850.	chr19 6086727
NM_030924	BC090046	PRTD-NY3.	chr19 6086727
NM_030924	NM_030924	Hypothetical protein FLJ32850.	chr19 6086709
NM_030940	BC002675	OTTHUMP00000021591.	chr9 88069283
NM_030940	NM_030940	HESB-like domain containing protein 2, mitochondrial precursor (Iron sulfur assembly protein IscA) (hIscA).	chr9 88069283
NM_030969	NM_030969	Transmembrane protein 14B.	chr6 10856035
NM_031208	BC063017	n/a	chr16 1817221
NM_031208	NM_001018104	n/a	chr16 1817230
NM_031208	NM_031208	Fumarylacetoacetate hydrolase domain containing protein 1 (EC 3.-.-.-) (YISK-like).	chr16 1817225
NM_031210	NM_031210	DC50 (DC23) (Hypothetical protein PD04872) (Hypothetical protein C14orf156).	chr14 77244187
NM_031244	BX538030	Hypothetical protein DKFZp686L2375.	chr6 13682794
NM_031244	NM_031244	Sirtuin (Silent mating type information regulation 2 homolog) 5 (S. cerevisiae).	chr6 13682811
NM_031280	NM_031280	28S ribosomal protein S15, mitochondrial precursor (S15mt) (MRP-S15).	chr1 36693959
NM_031295	BC008251	ABHD11 protein (Fragment).	chr7 72788362
NM_031295	NM_031295	Williams-Beuren syndrome critical region protein 21 form B.	chr7 72788362
NM_031295	NM_148912	ABHD11 protein (Fragment).	chr7 72788362
NM_031295	NM_148913	Williams-Beuren Syndrome critical region protein 21 form D.	chr7 72788362
NM_031295	NM_148914	Williams-Beuren Syndrome critical region protein 21 form E.	chr7 72788362
NM_031420	NM_031420	39S ribosomal protein L9, mitochondrial precursor (L9mt) (MRP-L9).	chr1 149998748
NM_031481	NM_031481	Mitochondrial glutamate carrier 2 (Glutamate/H(+) symporter 2) (Solute carrier family 25 member 18).	chr22 16423182
NM_031490	BC093910	Hypothetical protein FLJ14760.	chr16 46835744
NM_031490	BC093910	Hypothetical protein FLJ23951.	chr16 46835744
NM_031490	NM_031490	Peroxisomal lon protease.	chr16 46835711
NM_031900	NM_031900	Alanine--glyoxylate aminotransferase 2, mitochondrial precursor (EC 2.6.1.44) ((R)-3-amino-2-methylpropionate--pyruvate transaminase) (EC 2.6.1.40) (AGT 2) (Beta-alanine-pyruvate aminotransferase) (Beta- ALAAT II) (D-AIBAT).	chr5 35033962
NM_031902	AK058160	n/a	chr2 95116679
NM_031902	NM_031902	Mitochondrial 28S ribosomal protein S5 (S5mt) (MRP-S5).	chr2 95116679
NM_031903	NM_031903	39S ribosomal protein L32, mitochondrial precursor (L32mt) (MRP-L32).	chr7 42938463
NM_031947	NM_031947	Mitochondrial ornithine transporter 2 (Solute carrier family 25 member 2).	chr5 140662380
NM_032014	NM_032014	Mitochondrial ribosomal protein S24.	chr7 43872681
NM_032111	NM_032111	Mitochondrial ribosomal protein L14 (OTTHUMP00000016500).	chr6 44189349
NM_032112	BC052639	Mitochondrial ribosomal protein L43.	chr10 102736016
NM_032112	CR595972	Mitochondrial ribosomal protein L43.	chr10 102736033
NM_032112	NM_032112	Mitochondrial ribosomal protein L43.	chr10 102736016
NM_032151	BC054021	DcoH-like protein DCoHm (HNF1-alpha dimerization cofactor).	chr5 134268705
NM_032151	NM_032151	DcoH-like protein DCoHm (HNF1-alpha dimerization cofactor).	chr5 134268708
NM_032174	AK022832	Hypothetical protein FLJ12770.	chr1 159462473
NM_032174	NM_032174	Hypothetical protein FLJ14798 (TOMM40L protein) (Hypothetical protein DKFZp686I2086) (Novel protein).	chr1 159462476
NM_032309	NM_032309	Coiled-coil-helix-coiled-coil-helix domain containing protein 5.	chr2 113058506
NM_032314	NM_032314	Hypothetical protein DKFZp313K0719.	chr12 119425466
NM_032315	NM_032315	Mitochondrial carrier protein MGC4399 (Novel mitochondrial carrier protein).	chr1 9522144
NM_032317	NM_032317	Williams-Beuren syndrome chromosome region 18 protein.	chr7 72733183
NM_032351	NM_032351	39S ribosomal protein L45, mitochondrial precursor (L45mt) (MRP-L45).	chr17 33706516
NM_032409	NM_032409	Serine/threonine-protein kinase PINK1, mitochondrial precursor (EC 2.7.1.37) (PTEN-induced putative kinase protein 1) (BRPK).	chr1 20832534
NM_032436	BC065237	Hypothetical protein FLJ90413.	chr13 114098116
NM_032436	NM_032436	Chromosome 13 open reading frame 8.	chr13 114098116
NM_032476	AX750578	Sodium/myo-inositol cotransporter (Na(+)/myo-inositol cotransporter).	chr21 34367739
NM_032476	NM_032476	Mitochondrial 28S ribosomal protein S6 (S6mt) (MRP-S6).	chr21 34367692
NM_032477	NM_032477	Mitochondrial ribosomal protein L41 (Proliferation-inducing gene 3).	chr9 139566164
NM_032549	NM_032549	Hypothetical protein IMMP2L (Fragment).	chr7 110090345
NM_032593	NM_032593	Histidine triad nucleotide-binding protein 2 (EC 3.-.-.-) (HINT-2) (HINT-3) (HIT-17kDa) (PKCI-1-related HIT protein).	chr9 35802958
NM_032601	NM_032601	Methylmalonyl-CoA epimerase, mitochondrial precursor (EC 5.1.99.1) (DL-methylmalonyl-CoA racemase).	chr2 71190326
NM_032609	NM_032609	Cytochrome c oxidase subunit IV isoform 2, mitochondrial precursor (EC 1.9.3.1) (COX IV-2).	chr20 29689351
NM_032635	NM_032635	Seven transmembrane domain protein.	chr19 40728384
NM_032680	NM_032680	Hypothetical protein MGC4266.	chr12 3627369
NM_032683	BC093008	FKSG24 protein.	chr19 18165041
NM_032683	NM_032683	Hypothetical protein MGC12972.	chr19 18165049
NM_032689	AK131559	Hypothetical protein FLJ16803.	chr19 42879113
NM_032689	BC005085	ZNF607 protein.	chr19 42879111
NM_032689	BC014850	Zinc finger protein 607.	chr19 42879110
NM_032689	NM_032689	Zinc finger protein 607.	chr19 42879115
NM_032730	BC006399	n/a	chr6 107126543
NM_032730	NM_032730	Reticulon-4-interacting protein 1, mitochondrial precursor (NOGO- interacting mitochondrial protein).	chr6 107126543
NM_032747	NM_032747	Upregulated during skeletal muscle growth 5 (Hypothetical protein PD04912) (USMG5 protein) (HCV F-transactivated protein 2) (Novel protein).	chr10 105138803
NM_032765	NM_032765	Tripartite motif protein 52 (RING finger protein 102).	chr5 180615993
NM_032783	NM_032783	Carbonic reductase 4.	chr4 170145316
NM_032797	NM_032797	Apoptosis-inducing factor (AIF)-like mitchondrion-associated inducer of death (P53-responsive gene 3) (AMID protein) (Hypothetical protein FLJ14497) (Apoptosis-inducing factor (AIF)-homologous mitochondrion- associated inducer of death).	chr10 71542035
NM_032803	NM_032803	Cationic amino acid transporter 3 (CAT-3) (Solute carrier family 7 member 3) (Cationic amino acid transporter y+).	chrX 70062159
NM_032849	NM_032849	HAWMS3 protein (Fragment).	chr13 30378327
NM_032921	BC037567	Hypothetical protein pp9286.	chr5 177568196
NM_032921	NM_032921	Hypothetical protein pp9286.	chr5 177568194
NM_032921	NM_153373	Hypothetical protein MGC15875.	chr5 177568196
NM_032928	NM_032928	Hypothetical protein MGC14141 (OTTHUMP00000022604).	chr9 138805627
NM_033107	AF351613	UG0751c10.	chr7 89813914
NM_033107	CR933597	Hypothetical protein DKFZp686A10121.	chr7 89813956
NM_033107	NM_033107	Hypothetical protein DKFZp686A10121.	chr7 89813925
NM_033109	NM_033109	Polyribonucleotide nucleotidyltransferase 1, mitochondrial precursor (EC 2.7.7.8) (PNPase 1) (Polynucleotide phosphorylase-like protein) (PNPase old-35) (3'-5' RNA exonuclease OLD35).	chr2 55715970
NM_033214	NM_033214	Glycerol kinase, testis specific 2 (EC 2.7.1.30) (ATP:glycerol 3- phosphotransferase) (Glycerokinase) (GK).	chr4 80546531
NM_033281	NM_033281	Mitochondrial 28S ribosomal protein S36 (S36mt) (MRP-S36).	chr5 68549328
NM_033281	NM_033281	Mitochondrial 28S ribosomal protein S36 (S36mt) (MRP-S36).	chr5_h2_hap1 8323
NM_033318	NM_033318	Hypothetical protein LOC91689.	chr22 40805644
NM_033355	BC068050	CASP8 protein.	chr2 201831058
NM_033355	NM_033355	Caspase-8 precursor (EC 3.4.22.-) (CASP-8) (ICE-like apoptotic protease 5) (MORT1-associated CED-3 homolog) (MACH) (FADD-homologous ICE/CED-3-like protease) (FADD-like ICE) (FLICE) (Apoptotic cysteine protease) (Apoptotic protease Mch-5) (CAP4) [Contains:	chr2 201831023
NM_033355	NM_033357	CASP8 protein.	chr2 201831023
NM_033540	AK000700	n/a	chr3 180548216
NM_033540	NM_033540	Transmembrane GTPase MFN1 (EC 3.6.5.-) (Mitofusin-1) (Fzo homolog).	chr3 180548173
NM_052853	BC014107	ADCK2 protein.	chr7 140019424
NM_052853	NM_052853	Putative ubiquinone biosynthesis protein AarF.	chr7 140019421
NM_052963	NM_052963	DNA topoisomerase I, mitochondrial precursor (EC 5.99.1.2) (TOP1mt).	chr8 144462904
NM_058203	NM_058203	Epididymal protein 2 precursor (Fragment).	chr8 7306318
NM_080422	NM_080422	Protein tyrosine phosphatase, non-receptor type 2.	chr18 12775480
NM_080422	NM_080423	Protein tyrosine phosphatase, non-receptor type 2.	chr18 12775486
NM_080628	NM_080628	OTTHUMP00000030887 (Fragment).	chr20 34937983
NM_080665	NM_080665	Hypothetical protein FLJ39703.	chr19 10277108
NM_080748	NM_080748	Protein C20orf52.	chr20 33750805
NM_080916	NM_080916	Deoxyguanosine kinase, mitochondrial precursor (EC 2.7.1.113) (dGK).	chr2 74007460
NM_080916	NM_080917	Deoxyguanosine kinase, isoform c.	chr2 74007460
NM_080916	NM_080918	DGUOK protein.	chr2 74007460
NM_133259	NM_133259	130 kDa leucine-rich protein (LRP 130) (GP130) (Leucine-rich PPR-motif containing protein).	chr2 43968391
NM_133443	BC062555	Hypothetical protein FLJ37652.	chr16 45475843
NM_133443	NM_133443	Alanine aminotransferase 2.	chr16 45475808
NM_133451	NM_133451	Hypothetical protein DKFZp686C2322.	chr16 23440838
NM_133644	AF360743	Mitochondrial GTP binding protein 3 (Mitochondrial GTP binding protein 2).	chr19 17309363
NM_133644	NM_032620	Mitochondrial GTP binding protein 3 (Mitochondrial GTP binding protein 2).	chr19 17309378
NM_133644	NM_133644	GTP-binding protein isoform IV.	chr19 17309363
NM_138280	NM_138280	Citrate lyase beta like (Fragment).	chr13 99056936
NM_138384	BC035721	GTPBP7 protein.	chr10 135057706
NM_138384	NM_138384	Hypothetical protein FLJ90495.	chr10 135057689
NM_138413	AK094791	Hypothetical protein FLJ37472.	chr10 99334069
NM_138413	BC011916	C10orf65 protein (Chromosome 10 open reading frame 65).	chr10 99334091
NM_138413	NM_138413	Hypothetical protein C10orf65 (Chromosome 10 open reading frame 65).	chr10 99334110
NM_138446	NM_138446	Chromosome 7 open reading frame 30.	chr7 23305464
NM_138452	NM_138452	Dehydrogenase/reductase SDR family member 1 (EC 1.1.-.-).	chr14 23829645
NM_138492	AK095695	Hypothetical protein MGC21644.	chr5 145118774
NM_138492	NM_138492	Hypothetical protein MGC21644.	chr5 145118774
NM_138492	NM_182960	Hypothetical protein FLJ38376.	chr5 145118774
NM_138492	NM_205846	Hypothetical protein MGC21644.	chr5 145118774
NM_138711	NM_138711	Peroxisome proliferator-activated receptor gamma 1 (Fragment).	chr3 12305435
NM_138773	NM_138773	Hypothetical protein LOC91137.	chr5 110102652
NM_138817	NM_138817	Amino acid transporter.	chr8 87295403
NM_139179	AK074584	CDNA FLJ90103 fis, clone HEMBA1006311, highly similar to KCCR13L.	chr7 6415281
NM_139179	AK074744	Hypothetical protein FLJ23630.	chr7 6415285
NM_139179	BC027603	Hypothetical protein FLJ36639.	chr7 6415283
NM_139179	NM_139179	CDNA FLJ90103 fis, clone HEMBA1006311, highly similar to KCCR13L.	chr7 6415285
NM_139247	AK056745	ADCY4 protein (Fragment).	chr14 23857405
NM_139247	AK126468	Hypothetical protein FLJ44504.	chr14 23857394
NM_139247	AK131333	Hypothetical protein FLJ16344.	chr14 23857410
NM_139247	NM_139247	Adenylate cyclase type IV (EC 4.6.1.1) (ATP pyrophosphate-lyase 4) (Adenylyl cyclase 4).	chr14 23857410
NM_139283	NM_139283	T-cell activation protein phosphatase 2C.	chr12 109456619
NM_144576	BC073923	RFLT6192.	chr12 54947024
NM_144576	NM_144576	Hypothetical protein FLJ32441.	chr12 54946992
NM_144579	NM_144579	Sideroflexin-5.	chr2 73022673
NM_144617	NM_144617	Heat-shock protein beta-6 (HspB6) (Heat-shock 20 kDa-like protein p20).	chr19 40937309
NM_144636	BC033775	Coiled-coil-helix-coiled-coil-helix domain containing protein 4.	chr3 14128583
NM_144636	NM_144636	Coiled-coil-helix-coiled-coil-helix domain containing protein 4.	chr3 14128583
NM_144736	BC004548	PRO1853.	chr2 37312312
NM_144736	BX538031	Hypothetical protein DKFZp686A0176.	chr2 37312325
NM_144736	NM_144736	Hypothetical protein PRO1853.	chr2 37312293
NM_145251	NM_145251	Serine/threonine/tyrosine interacting protein (Protein tyrosine phosphatase-like protein).	chr14 52266681
NM_145255	NM_145255	Mitochondrial ribosomal protein L10, isoform a.	chr17 43255637
NM_145255	NM_148887	Mitochondrial ribosomal protein L10, isoform a.	chr17 43255637
NM_145267	NM_145267	Chromosome 6 open reading frame 57 (Hypothetical protein C6orf57).	chr6 71333345
NM_145286	NM_145286	Stomatin-like protein 3.	chr13 38438062
NM_145305	NM_145305	Mitochondrial solute carrier protein.	chrX 118417050
NM_145315	NM_145315	LACE1 protein (Lactation elevated 1).	chr6 108722790
NM_145651	NM_145651	RYD5 (Secretoglobin, family 1C, member 1).	chr11 183079
NM_145651	NM_145651	RYD5 (Secretoglobin, family 1C, member 1).	chr17_random 674108
NM_145691	NM_145691	ATP synthase mitochondrial F1 complex assembly factor 2, mitochondrial precursor (ATP12 homolog).	chr17 17862058
NM_145748	AF201385	Thioredoxin reductase 2 isoform 1 variant (Fragment).	chr22 18243069
NM_145748	NM_006440	Thioredoxin reductase 2, mitochondrial precursor (EC 1.8.1.9) (TR3) (TR-beta) (Selenoprotein Z) (SelZ).	chr22 18243045
NM_145748	NM_145747	n/a	chr22 18243040
NM_145748	NM_145748	n/a	chr22 18243039
NM_147780	NM_147780	Cathepsin B precursor (EC 3.4.22.1) (Cathepsin B1) (APP secretase) (APPS) [Contains: Cathepsin B light chain; Cathepsin B heavy chain].	chr8 11737444
NM_152260	BC016967	Hypothetical protein FLJ31409.	chr15 38648822
NM_152260	NM_152260	Hypothetical protein FLJ31409.	chr15 38648828
NM_152269	NM_152269	My030 protein (Hypothetical protein FLJ38663).	chr12 122283415
NM_152295	NM_152295	Threonyl-tRNA synthetase, cytoplasmic (EC 6.1.1.3) (Threonine--tRNA ligase) (ThrRS).	chr5 33476654
NM_152352	NM_152352	Hypothetical protein FLJ31056.	chr18 13655744
NM_152389	BC031585	Hypothetical protein MGC35338.	chr2 219606657
NM_152389	NM_152389	Hypothetical protein MGC35338.	chr2 219606657
NM_152407	NM_152407	GrpE protein homolog 2, mitochondrial precursor (Mt-GrpE#2).	chr5 148705284
NM_152430	NM_152430	Olfactory receptor 51E1.	chr11 4630135
NM_152509	NM_152509	Hypothetical protein.	chr22 22062792
NM_152544	NM_152544	Hypothetical protein FLJ35725.	chr4 8507042
NM_152707	NM_152707	Grave disease carrier protein (GDC) (Grave disease autoantigen) (GDA) (Mitochondrial solute carrier protein homolog).	chr10 69912103
NM_152740	NM_152740	3-hydroxyisobutyrate dehydrogenase, mitochondrial precursor (EC 1.1.1.31) (HIBADH).	chr7 27531587
NM_152912	NM_152912	Mitochondrial translational initiation factor 3.	chr13 26907782
NM_153336	NM_153336	L-seryl-tRNA(Ser/Sec) kinase (EC 2.7.1.-) (Phosphoseryl-tRNA(Ser/Sec) kinase).	chr10 124729545
NM_153365	NM_153365	CDNA FLJ90013 fis, clone HEMBA1000477.	chr4 15772016
NM_153486	NM_153486	LDHD protein (D-lactate dehydrogenase, isoform 1).	chr16 73703259
NM_153486	NM_194436	D-lactate dehydrogenase.	chr16 73703259
NM_170751	NM_170751	Chromodomain protein, Y chromosome-like, isoform b.	chr6 4721681
NM_170751	NM_170752	Hypothetical protein DKFZp586C1622 (Fragment).	chr6 4721681
NM_173353	NM_173353	Tryptophan 5-hydroxylase 2 (EC 1.14.16.4) (Tryptophan 5-monooxygenase 2) (Neuronal tryptophan hydroxylase).	chr12 70618892
NM_173463	NM_173463	Hypothetical protein DKFZp761B107.	chr4 24437678
NM_173533	NM_173533	Tudor domain-containing protein 5.	chr1 177827647
NM_173539	NM_173539	WUGSC:H_DJ0855D21.3 protein (Fragment).	chr8 172384
NM_173637	BC031671	MGC34725 protein.	chr19 6377049
NM_173637	NM_173637	Hypothetical protein FLJ40442.	chr19 6377049
NM_173659	BC062362	RPUSD3 protein.	chr3 9854533
NM_173659	NM_173659	RPUSD3 protein.	chr3 9854533
NM_174912	NM_174912	Hypothetical protein FLJ31204.	chrX 57329863
NM_174917	BC072391	LOC197322 protein.	chr16 87687823
NM_174917	NM_174917	CDNA PSEC0197 fis, clone HEMBA1001490, weakly similar to PEROXISOMAL- COENZYME A SYNTHETASE (EC 6.-.-.-).	chr16 87687824
NM_174922	BC101659	ADCK5 protein.	chr8 145568571
NM_174922	NM_174922	ADCK5 protein.	chr8 145568538
NM_175614	NM_175614	NADH-ubiquinone oxidoreductase subunit B14.7 (EC 1.6.5.3) (EC 1.6.99.3) (Complex I-B14.7) (CI-B14.7).	chr19 5845685
NM_175900	NM_175900	Hypothetical protein FLJ35681.	chr16 29661288
NM_175900	NM_175900	Hypothetical protein FLJ35681.	chr16_random 41079
NM_175907	NM_175907	Zinc binding alcohol dehydrogenase, domain containing 2 (ZADH2 protein).	chr18 71039474
NM_177478	NM_177478	Ferritin, mitochondrial precursor (EC 1.16.3.1).	chr5 121215548
NM_178526	NM_178526	Hypothetical protein MGC26694.	chr19 19035807
NM_178836	AK098419	Hypothetical protein FLJ25553.	chr17 17045035
NM_178836	NM_178836	Hypothetical protein LOC201164.	chr17 17045035
NM_178858	NM_178858	Sideroflexin-2.	chr10 104464287
NM_178867	BC063562	Sideroflexin 4.	chr10 120890431
NM_178867	BC063562	n/a	chr10 120890431
NM_178867	NM_178867	Sideroflexin 4 (Fragment).	chr10 120890420
NM_178867	NM_213649	Sideroflexin-4 (Breast cancer resistance marker 1).	chr10 120890420
NM_181354	BC032710	Hypothetical protein FLJ10125.	chr8 107739269
NM_181354	NM_181354	Oxidation resistance 1 (Hypothetical protein DKFZp667P065).	chr8 107739269
NM_181463	AY358771	Mitochondrial ribosomal protein L55.	chr1 226361010
NM_181463	NM_181463	Mitochondrial ribosomal protein L55.	chr1 226361003
NM_181514	NM_181514	MRPL21 protein.	chr11 68415322
NM_181705	NM_181705	Hypothetical protein LOC90624.	chr5 130534575
NM_181782	NM_181782	Hypothetical protein (Fragment).	chr6 126143999
NM_181806	AY422212	Putative non-ribosomal peptide synthetase NRPS998.	chr4 56899215
NM_181806	NM_181806	AASDH protein (Fragment).	chr4 56899215
NM_182476	NM_182476	Ubiquinone biosynthesis monooxgenase COQ6 (EC 1.14.13.-).	chr14 73486708
NM_182480	BX248000	Full-length cDNA clone CS0DM001YP16 of Fetal liver of Homo sapiens (human).	chr14 73486395
NM_182480	NM_182480	Full-length cDNA clone CS0DM001YP16 of Fetal liver of Homo sapiens (human).	chr14 73486395
NM_182631	BC053879	Hypothetical protein FLJ43952.	chr3 199269336
NM_182631	NM_182631	Hypothetical protein LOC348840.	chr3 199269336
NM_182640	NM_182640	28S ribosomal protein S9, mitochondrial precursor (S9mt) (MRP-S9).	chr2 105020937
NM_182971	NM_182971	Cytochrome c oxidase polypeptide VIII isoform 3, mitochondrial precursor (EC 1.9.3.1) (Cytochrome c oxidase subunit 8-3) (COX VIII- 3).	chr14 92883289
NM_183050	BC034481	2-oxoisovalerate dehydrogenase beta subunit, mitochondrial precursor (EC 1.2.4.4) (Branched-chain alpha-keto acid dehydrogenase E1 component beta chain) (BCKDH E1-beta).	chr6 80873106
NM_183050	NM_183050	2-oxoisovalerate dehydrogenase beta subunit, mitochondrial precursor (EC 1.2.4.4) (Branched-chain alpha-keto acid dehydrogenase E1 component beta chain) (BCKDH E1-beta).	chr6 80873082
NM_194279	NM_194279	HBLD1 protein.	chr14 74030220
NM_194302	AK125957	Hypothetical protein FLJ43969.	chr2 219575819
NM_194302	AK127189	Hypothetical protein FLJ45254.	chr2 219575819
NM_194302	NM_194302	Hypothetical protein DKFZp434O0527 (Fragment).	chr2 219575819
NM_197962	BC028113	n/a	chr1 191332220
NM_197962	NM_016066	Glutaredoxin 2.	chr1 191332223
NM_197962	NM_197962	Glutaredoxin-2, mitochondrial precursor.	chr1 191332222
NM_197964	NM_197964	Hypothetical protein HSPC268.	chr7 138676614
NM_198083	BC000663	NADP(H)-dependent retinol dehydrogenase/reductase A1 like protein 1.	chr14 23527958
NM_198083	NM_198083	Dehydrogenase/reductase (SDR family) member 4 like 2.	chr14 23527958
NM_198450	NM_198450	Protein CXorf33 precursor.	chrX 84145560
NM_198516	AK124690	Hypothetical protein FLJ42700.	chr11 11248998
NM_198516	NM_198516	Putative polypeptide N-acetylgalactosaminyltransferase-like protein 4 (EC 2.4.1.41) (Protein-UDP acetylgalactosaminyltransferase-like protein 4) (UDP-GalNAc:polypeptide N-acetylgalactosaminyltransferase- like protein 4) (Polypeptide GalNAc transferase-lik	chr11 11249001
NM_199069	NM_199069	Nuclear protein E3-3, isoform a.	chr3 49034077
NM_199069	NM_199417	Hypothetical protein DKFZp564J0123.	chr3 49034077
NM_199336	NM_199336	Hypothetical protein DKFZp434N062 (Hypothetical protein CGI-105).	chr2 97113050
NM_199345	NM_199345	Em:AP000557.3 protein.	chr22 20157439
NM_199420	AF052573	DNA polymerase theta (EC 2.7.7.7) (DNA polymerase eta).	chr3 122632970
NM_199420	AY338826	DNA polymerase theta (EC 2.7.7.7) (DNA polymerase eta).	chr3 122632970
NM_199420	NM_199420	DNA polymerase theta (EC 2.7.7.7) (DNA polymerase eta).	chr3 122632963
NM_203405	NM_203405	Hypothetical protein KRTAP26-1 (Keratin associated protein).	chr21 30613322
NM_206866	NM_206866	Transcription regulator protein BACH1 (BTB and CNC homolog 1) (HA2303).	chr21 29593607
NM_207117	AB073385	Hypothetical protein HMFN1655.	chr14 99859431
NM_207117	AK092001	Hepatocellular carcinoma-downregulated mitochondrial carrier protein.	chr14 99859427
NM_207117	CR607410	Hepatocellular carcinoma-downregulated mitochondrial carrier protein.	chr14 99859447
NM_207117	NM_207117	Hepatocellular carcinoma-downregulated mitochondrial carrier protein.	chr14 99859431
NM_207377	NM_207377	TIMM9.	chr14 57932396
NM_207485	NM_207485	Hypothetical protein FLJ41327.	chr2 242617479
NM_213720	NM_213720	N27C7-4 protein (Chromosome 22 open reading frame 16).	chr22 22438021
U66669	U66669	Hypothetical protein HIBCH (Fragment).	chr2 190777984
X97386	X97386	DGUOK protein.	chr2 74007585
Y11681	Y11681	28S ribosomal protein S12, mitochondrial precursor (S12mt) (MRP-S12) (MT-RPS12).	chr19 44113433

## Sheet: Predicted Non-Mito
Table of predicted Non-Mitochondrial "Independent" Genes and associated original genes and their descriptions.
This data derived from the work in: Xie, X., J. Lu, et al. (2005). "Systematic discovery of regulatory motifs in human promoters and 3' UTRs by comparison of several mammals." Nature 434(7031): 338-45
along with data downloaded from http://genome.ucsc.edu/ ref: Kent, W.J., Sugnet, C. W., Furey, T. S., Roskin, K.M., Pringle, T. H., Zahler, A. M., and Haussler, D. The Human Genome Browser at UCSC. Genome Res. 12(6), 996-1006 (2002).
Independent Gene	Original Gene	Original Gene Description	Original Gene Location
AB002311	AB002311	Rap guanine nucleotide exchange factor 2 (PDZ domain containing guanine nucleotide exchange factor 1) (PDZ-GEF1) (RA-GEF).	chr4 160408695
AB012614	AB012614	Period circadian protein 2 (Fragment).	chr2 238835190
AB029331	AB029331	Chromosome 6 open reading frame 18 (Fragment).	chr6_cox_hap1 2561482
AB037819	AB037819	Ribosome-binding protein 1 (Ribosome receptor protein) (180 kDa ribosome receptor homolog) (ES/130 related protein).	chr20 17542324
AB044556	AB044556	Partitioning defective 6 homolog gamma (PAR-6 gamma) (PAR6D).	chr18 76018644
AF043101	AF043101	Caveolin-3 (M-caveolin).	chr3 8750565
AF044288	AF044288	Aryl hydrocarbon receptor nuclear translocator-like protein 1 (Brain and muscle ARNT-like 1) (Member of PAS protein 3) (Basic-helix-loop- helix-PAS orphan MOP3) (bHLH-PAS protein JAP3).	chr11 13255953
AF071476	AF071476	RGS9 protein.	chr17 60564053
AF071476	AF071476	Regulator of G-protein signaling 9 (RGS9).	chr17 60564053
AF071476	BC022504	RGS9 protein.	chr17 60564048
AF071476	BC022504	n/a	chr17 60564048
AF109355	AF109355	Eukaryotic translation initiation factor 3 subunit 12 (eIF-3 p25) (eIF3k) (Muscle-specific gene M9 protein) (ARG134).	chr19 43801687
AF205718	AF205718	n/a	chr8 10660078
AF224759	AF224759	STAGA complex 65 gamma subunit (STAF65gamma) (SPTF-associated factor 65 gamma) (Suppressor of Ty 7-like) (Adenocarcinoma antigen ART1).	chr2 27729422
AF367022	AF367022	n/a	chr2 95326913
AK023285	AK023285	Macrophin 1 isoform (Fragment).	chr1 39706851
AK026065	AK026065	Nicotinamide mononucleotide adenylyltransferase 1 (EC 2.7.7.1) (NMN adenylyltransferase 1).	chr1 9926094
AK126665	AK126665	p130Cas-associated protein (p140Cap) (SNAP-25-interacting protein) (SNIP).	chr17 33951044
AK128371	AK128371	Hypothetical protein FLJ46514.	chr8 27344437
AK223630	AK223630	Jun D proto-oncogene variant (Fragment).	chr19 18251703
AL137748	AL137748	Neurobeachin.	chr13 35065142
AL831818	AL831818	Hypothetical protein FLJ33747.	chr5 149960834
AL831818	AL831818	Synaptopodin.	chr5 149960834
AL831818	AL831818	n/a	chr5 149960834
AL833949	AL833949	SMC4L1 protein (Hypothetical protein) (Fragment).	chr3 161600149
AL834373	AL834373	Hypothetical protein DKFZp686M2226.	chr22 36632446
AL834417	AL834417	Cold shock domain protein C2 (RNA-binding protein PIPPin).	chr22 40287074
AY144615	AY144615	Forkhead box protein P2 (CAG repeat protein 44) (Trinucleotide repeat- containing gene 10 protein).	chr7 113842287
AY144615	AY144615	n/a	chr7 113842287
AY144615	BC018016	Hypothetical protein FOXP2.	chr7 113842287
AY353086	AY353086	FK506-binding protein 7.	chr2 179038742
BC000884	AX775781	Signal peptidase complex subunit 1 (EC 3.4.-.-) (Microsomal signal peptidase 12 kDa subunit) (SPase 12 kDa subunit).	chr3 52715167
BC000884	BC000884	Signal peptidase complex subunit 1 (EC 3.4.-.-) (Microsomal signal peptidase 12 kDa subunit) (SPase 12 kDa subunit).	chr3 52715193
BC001722	BC001722	Protein C14orf166.	chr14 51526025
BC001723	BC001723	Egl nine homolog 2 (EC 1.14.11.-) (Hypoxia-inducible factor prolyl hydroxylase 1) (HIF-prolyl hydroxylase 1) (HIF-PH1) (HPH-3) (Prolyl hydroxylase domain-containing protein 1) (PHD1) (Estrogen-induced tag 6).	chr19 45996984
BC002510	BC002510	Ras-related protein Rab-6B.	chr3 135030055
BC002727	BC002727	Syntenin-2 (Syndecan binding protein 2).	chr20 1238622
BC002727	BC002727	n/a	chr20 1238622
BC002844	BC002844	Nuclear factor NF-kappa-B p100 subunit (DNA-binding factor KBF2) (H2TF1) (Lymphocyte translocation chromosome 10) (Oncogene Lyt-10) (Lyt10) [Contains: Nuclear factor NF-kappa-B p52 subunit].	chr10 104144319
BC006103	BC006103	n/a	chr15 72695298
BC006103	CR933693	Hypothetical protein FLJ42022.	chr15 72695257
BC007930	BC007930	ANK1 protein.	chr8 41631995
BC007930	BC014467	ANK1 protein.	chr8 41631995
BC008759	BC008759	VIMP.	chr15 99630014
BC010074	BC010074	FUS interacting protein (Serine-arginine rich) 1.	chr1 24166538
BC010074	BC010074	FUS interacting protein (Serine-arginine rich) 1.	chr1_random 1501616
BC010120	BC010120	Proliferation-inducing gene 20 protein.	chr11 32069183
BC010120	BC010120	Reticulocalbin-1 precursor.	chr11 32069183
BC012395	BC012395	Neural retina-specific leucine zipper protein (NRL) (D14S46E).	chr14 23619889
BC014664	BC014664	COUP transcription factor 2 (COUP-TF2) (COUP-TF II) (Apolipoprotein AI regulatory protein 1) (ARP-1).	chr15 94676188
BC016140	BC016140	Mevalonate kinase (EC 2.7.1.36) (MK).	chr12 108496030
BC016314	BC016314	DNA-repair protein XRCC4 (X-ray repair cross-complementing protein 4).	chr5 82409167
BC020786	BC020786	n/a	chr4 155677220
BC033086	BC033086	Transcription factor 19 (Transcription factor SC1).	chr6 31234384
BC033086	BC033086	Transcription factor 19 (Transcription factor SC1).	chr6_cox_hap1 2577669
BC033086	BC033086	Transcription factor 19 (Transcription factor SC1).	chr6_qbl_hap2 2376203
BC035059	BC035059	Potassium voltage-gated channel subfamily A member 3 (Voltage-gated potassium channel subunit Kv1.3) (HPCN3) (HGK5) (HuKIII) (HLK3).	chr1 111016613
BC044656	BC044656	Cancer susceptibility candidate gene 3 protein (Metastatic lymph node protein 51) (MLN 51 protein) (Barentsz protein) (Btz).	chr17 35550152
BC048298	BC048298	DC42 (TBL1XR1 protein).	chr3 178221236
BC051284	BC051284	Signal transducer and activator of transcription 2 (p113).	chr12 55021650
BC054892	BC054892	Dynein light chain 2B, cytoplasmic.	chr16 79132422
BC065830	BC065830	Claudin-9.	chr16 3003129
BC067827	BC067827	Musculin (Activated B-cell factor 1) (ABF-1).	chr8 72916338
BC069355	BC069355	Potassium voltage-gated channel subfamily A member 6 (Voltage-gated potassium channel subunit Kv1.6) (HBK2).	chr12 4789371
BC070080	BC070080	Aryl hydrocarbon receptor precursor (Ah receptor) (AhR).	chr7 17304882
BC070321	BC070321	T-cell surface glycoprotein CD3 delta chain precursor (T-cell receptor T3 delta chain).	chr11 117714998
BC073925	BC073925	Hypothetical protein.	chr1 147663586
BC074863	BC074863	Homeobox protein Nkx-3.1.	chr8 23594656
BC074909	BC074909	ST8 alpha-N-acetyl-neuraminide alpha-2,8-sialyltransferase 3.	chr18 53171027
BC101633	BC101633	Voltage-dependent calcium channel gamma-5 subunit (Neuronal voltage- gated calcium channel gamma-5 subunit).	chr17 62303852
BT007364	BT007364	Cone-rod homeobox protein.	chr19 53029512
BX161420	BX161420	Ig mu chain C region.	chr14 105391393
CR456364	CR456364	Protein MICAL-3.	chr22 16704440
D87467	D87467	Rap guanine nucleotide exchange factor 5 (Guanine nucleotide exchange factor for Rap1) (Related to Epac) (Repac) (M-Ras-regulated Rap GEF) (MR-GEF).	chr7 22124446
DQ228003	DQ228003	TRIO and F-actin binding protein (Protein Tara) (Trio-associated repeat on actin).	chr22 36423573
DQ228003	DQ228005	TRIO and F-actin binding protein (Protein Tara) (Trio-associated repeat on actin).	chr22 36423573
M61156	M61156	OTTHUMP00000016012.	chr6 10510244
NM_000046	NM_000046	Arylsulfatase B precursor (EC 3.1.6.12) (ASB) (N-acetylgalactosamine- 4-sulfatase) (G4S).	chr5 78108794
NM_000052	NM_000052	Copper-transporting ATPase 1 (EC 3.6.3.4) (Copper pump 1) (Menkes disease-associated protein).	chrX 77052854
NM_000057	NM_000057	Bloom's syndrome protein (EC 3.6.1.-) (RecQ protein-like 3) (DNA helicase, RecQ-like type 2).	chr15 89061605
NM_000059	NM_000059	Breast cancer type 2 susceptibility protein (Fanconi anemia group D1 protein).	chr13 31787616
NM_000068	NM_000068	Voltage-dependent P/Q-type calcium channel alpha-1A subunit (Voltage- gated calcium channel alpha subunit Cav2.1) (Calcium channel, L type, alpha-1 polypeptide isoform 4) (Brain calcium channel I) (BI).	chr19 13179114
NM_000068	NM_023035	Voltage-dependent P/Q-type calcium channel alpha-1A subunit (Voltage- gated calcium channel alpha subunit Cav2.1) (Calcium channel, L type, alpha-1 polypeptide isoform 4) (Brain calcium channel I) (BI).	chr19 13179114
NM_000073	NM_000073	T-cell surface glycoprotein CD3 gamma chain precursor (T-cell receptor T3 gamma chain).	chr11 117720310
NM_000077	L27211	n/a	chr9 21957751
NM_000077	NM_000077	Cyclin-dependent kinase inhibitor 2A, isoforms 1/2/3 (Cyclin-dependent kinase 4 inhibitor A) (CDK4I) (p16-INK4) (p16-INK4a) (Multiple tumor suppressor 1) (MTS1).	chr9 21957751
NM_000077	NM_058195	Cyclin-dependent kinase inhibitor 2A, isoform 4 (p14ARF) (p19ARF).	chr9 21957751
NM_000077	NM_058197	Cyclin-dependent kinase inhibitor 2A (Fragment).	chr9 21957751
NM_000077	U26727	Cyclin-dependent kinase inhibitor 2A (Fragment).	chr9 21957751
NM_000080	NM_000080	Acetylcholine receptor protein, epsilon subunit precursor.	chr17 4741839
NM_000088	NM_000088	Collagen alpha-1(I) chain precursor.	chr17 45616457
NM_000104	NM_000104	Cytochrome P450 1B1 (EC 1.14.14.1) (CYPIB1).	chr2 38148249
NM_000106	NM_000106	Cytochrome P450 2D6 (EC 1.14.14.1) (CYPIID6) (P450-DB1) (Debrisoquine 4-hydroxylase).	chr22 40852446
NM_000106	NM_001025161	CYP2D variant (Fragment).	chr22 40852446
NM_000121	CR610088	n/a	chr19 11349464
NM_000121	NM_000121	Erythropoietin receptor precursor (EPO-R).	chr19 11349474
NM_000122	NM_000122	TFIIH basal transcription factor complex helicase XPB subunit (EC 3.6.1.-) (Basic transcription factor 2 89 kDa subunit) (BTF2-p89) (TFIIH 89 kDa subunit) (DNA-repair protein complementing XP-B cells) (Xeroderma pigmentosum group B complementing protein)	chr2 127731335
NM_000127	NM_000127	Exostosin-1 (EC 2.4.1.224) (EC 2.4.1.225) (Glucuronosyl-N- acetylglucosaminyl-proteoglycan/N-acetylglucosaminyl-proteoglycan 4- alpha-N-acetylglucosaminyltransferase) (Putative tumor suppressor protein EXT1) (Multiple exostoses protein 1).	chr8 118880782
NM_000136	NM_000136	Fanconi anemia group C protein (Protein FACC).	chr9 96901158
NM_000139	NM_000139	High affinity immunoglobulin epsilon receptor beta-subunit (FcERI) (IgE Fc receptor, beta-subunit) (Fc epsilon receptor I beta-chain).	chr11 59612712
NM_000142	NM_000142	Fibroblast growth factor receptor 3 precursor (EC 2.7.1.112) (FGFR-3) (CD333 antigen).	chr4 1765420
NM_000142	NM_022965	n/a	chr4 1765420
NM_000145	NM_000145	Follicle-stimulating hormone receptor precursor (FSH-R) (Follitropin receptor).	chr2 49043156
NM_000145	NM_181446	Hypothetical protein FSHR (Fragment).	chr2 49043156
NM_000151	NM_000151	Glucose-6-phosphatase (EC 3.1.3.9) (G6Pase) (G-6-Pase).	chr17 38306340
NM_000163	NM_000163	Growth hormone receptor precursor (GH receptor) (Somatotropin receptor) [Contains: Growth hormone binding protein (GH binding protein) (GHBP) (Serum binding protein)].	chr5 42459782
NM_000166	NM_000166	Gap junction beta-1 protein (Connexin-32) (Cx32) (GAP junction 28 kDa liver protein).	chrX 70359800
NM_000168	NM_000168	Zinc finger protein GLI3.	chr7 41970202
NM_000169	NM_000169	Alpha-galactosidase A precursor (EC 3.2.1.22) (Melibiase) (Alpha-D- galactoside galactohydrolase) (Alpha-D-galactosidase A) (Agalsidase alfa).	chrX 100539452
NM_000171	NM_000171	Glycine receptor alpha-1 chain precursor (Glycine receptor 48 kDa subunit) (Strychnine binding subunit).	chr5 151182360
NM_000177	NM_000177	Gelsolin precursor (Actin-depolymerizing factor) (ADF) (Brevin) (AGEL).	chr9 123101913
NM_000180	NM_000180	Retinal guanylyl cyclase 1 precursor (EC 4.6.1.2) (Guanylate cyclase 2D, retinal) (RETGC-1) (Rod outer segment membrane guanylate cyclase) (ROS-GC).	chr17 7846716
NM_000181	NM_000181	Beta-glucuronidase precursor (EC 3.2.1.31) (Beta-G1).	chr7 65063109
NM_000192	NM_000192	T-box transcription factor TBX5 (T-box protein 5).	chr12 113276118
NM_000192	NM_080717	Transcription factor T-box 5.	chr12 113276118
NM_000203	NM_000203	Alpha-L-iduronidase precursor (EC 3.2.1.76).	chr4 970784
NM_000206	NM_000206	Cytokine receptor common gamma chain precursor (Gamma-C) (Interleukin- 2 receptor gamma chain) (IL-2R gamma chain) (P64) (CD132 antigen).	chrX 70243983
NM_000209	NM_000209	Insulin promoter factor 1 (IPF-1) (Pancreas/duodenum homeobox 1) (PDX- 1) (Islet/duodenum homeobox-1) (IDX-1) (Somatostatin-transactivating factor 1) (STF-1) (Insulin upstream factor 1) (IUF-1) (Glucose- sensitive factor) (GSF).	chr13 27392176
NM_000210	NM_000210	Integrin alpha-6 precursor (VLA-6) (CD49f) [Contains: Integrin alpha-6 heavy chain; Integrin alpha-6 light chain].	chr2 173000615
NM_000211	AK097864	Hypothetical protein FLJ40545.	chr21 45130298
NM_000211	NM_000211	Integrin beta-2 precursor (Cell surface adhesion glycoproteins LFA- 1/CR3/p150,95 beta-subunit) (CD18) (Complement receptor C3 beta- subunit).	chr21 45130313
NM_000212	AY826979	Integrin beta 3 (Fragment).	chr17 42686217
NM_000212	NM_000212	Integrin beta-3 precursor (Platelet membrane glycoprotein IIIa) (GPIIIa) (CD61 antigen).	chr17 42686206
NM_000214	NM_000214	Jagged-1 precursor (Jagged1) (hJ1) (CD339 antigen).	chr20 10566333
NM_000216	NM_000216	Anosmin-1 precursor (Kallmann syndrome protein) (Adhesion molecule- like X-linked).	chrX 8456915
NM_000218	NM_000218	Potassium voltage-gated channel subfamily KQT member 1 (Voltage-gated potassium channel subunit Kv7.1) (IKs producing slow voltage-gated potassium channel alpha subunit KvLQT1) (KQT-like 1).	chr11 2422796
NM_000223	NM_000223	Keratin, type I cytoskeletal 12 (Cytokeratin-12) (CK-12) (Keratin-12) (K12).	chr17 36271081
NM_000231	NM_000231	Gamma-sarcoglycan (Gamma-SG) (35 kDa dystrophin-associated glycoprotein) (35DAG).	chr13 22653090
NM_000232	NM_000232	Beta-sarcoglycan (Beta-SG) (43 kDa dystrophin-associated glycoprotein) (43DAG) (A3b).	chr4 52581628
NM_000235	AK096406	Lipase A, lysosomal acid, cholesterol esterase (Wolman disease).	chr10 90963311
NM_000235	AK125193	Lipase A, lysosomal acid, cholesterol esterase (Wolman disease).	chr10 90963317
NM_000235	NM_000235	Lysosomal acid lipase/cholesteryl ester hydrolase precursor (EC 3.1.1.13) (LAL) (Acid cholesteryl ester hydrolase) (Sterol esterase) (Lipase A) (Cholesteryl esterase).	chr10 90963311
NM_000242	NM_000242	Mannose-binding protein C precursor (MBP-C) (MBP1) (Mannan-binding protein) (Mannose-binding lectin).	chr10 54195146
NM_000243	NM_000243	Pyrin (Marenostrin).	chr16 3232028
NM_000249	NM_000249	DNA mismatch repair protein Mlh1 (MutL protein homolog 1).	chr3 37009982
NM_000251	NM_000251	DNA mismatch repair protein Msh2 (MutS protein homolog 2).	chr2 47483766
NM_000257	NM_000257	Myosin heavy chain, cardiac muscle beta isoform (MyHC-beta).	chr14 22951789
NM_000259	NM_000259	Myosin-5A (Myosin Va) (Dilute myosin heavy chain, non-muscle) (Myosin heavy chain 12) (Myoxin).	chr15 50392602
NM_000268	NM_000268	Merlin (Moesin-ezrin-radixin-like protein) (Neurofibromin-2) (Schwannomin) (Schwannomerlin).	chr22 28329564
NM_000268	NM_181826	NF2 protein (Fragment).	chr22 28329564
NM_000268	NM_181827	Neurofibromatosis type 2 (Fragment).	chr22 28329564
NM_000268	NM_181828	Neurofibromatosis type 2 (Fragment).	chr22 28329564
NM_000268	NM_181829	Neurofibromatosis type 2 (Fragment).	chr22 28329564
NM_000268	NM_181830	Neurofibromatosis type 2 (Fragment).	chr22 28329564
NM_000268	NM_181832	Merlin (Moesin-ezrin-radixin-like protein) (Neurofibromin-2) (Schwannomin) (Schwannomerlin).	chr22 28329564
NM_000268	NM_181833	Neurofibromatosis type 2 (Fragment).	chr22 28329564
NM_000268	NM_181834	Neurofibromatosis type 2 (Fragment).	chr22 28329564
NM_000268	NM_181835	Neurofibromatosis type 2 (Fragment).	chr22 28329564
NM_000269	NM_000269	Nucleoside diphosphate kinase A (EC 2.7.4.6) (NDK A) (NDP kinase A) (Tumor metastatic process-associated protein) (Metastasis inhibition factor nm23) (nm23-H1) (Granzyme A-activated DNase) (GAAD).	chr17 46585918
NM_000269	NM_001018136	Nucleoside diphosphate kinase B (EC 2.7.4.6) (NDK B) (NDP kinase B) (nm23-H2) (C-myc purine-binding transcription factor PUF).	chr17 46585918
NM_000269	NM_198175	Nucleoside diphosphate kinase A (EC 2.7.4.6) (NDK A) (NDP kinase A) (Tumor metastatic process-associated protein) (Metastasis inhibition factor nm23) (nm23-H1) (Granzyme A-activated DNase) (GAAD).	chr17 46585918
NM_000271	NM_000271	Niemann-Pick C1 protein precursor.	chr18 19365462
NM_000280	NM_000280	Paired box protein Pax-6 (Oculorhombin) (Aniridia type II protein).	chr11 31767034
NM_000280	NM_001604	Paired box protein Pax-6 (Oculorhombin) (Aniridia type II protein).	chr11 31767034
NM_000286	NM_000286	Peroxisome assembly protein 12 (Peroxin-12) (Peroxisome assembly factor 3) (PAF-3).	chr17 30925927
NM_000292	NM_000292	Phosphorylase b kinase alpha regulatory chain, liver isoform (Phosphorylase kinase alpha L subunit).	chrX 18820799
NM_000297	NM_000297	Polycystin-2 (Autosomal dominant polycystic kidney disease type II protein) (Polycystwin) (R48321).	chr4 89147843
NM_000299	NM_000299	Plakophilin-1 (Band-6 protein) (B6P).	chr1 199519202
NM_000299	NM_001005337	n/a	chr1 199519202
NM_000304	NM_000304	Peripheral myelin protein 22 (PMP-22).	chr17 15073821
NM_000306	NM_000306	Pituitary-specific positive transcription factor 1 (Pit-1) (Growth hormone factor 1) (GHF-1).	chr3 87391472
NM_000310	NM_000310	Palmitoyl-protein thioesterase 1 precursor (EC 3.1.2.22) (Palmitoyl- protein hydrolase 1).	chr1 40310970
NM_000318	NM_000318	Peroxisome assembly factor 1 (PAF-1) (Peroxin-2) (Peroxisomal membrane protein 3) (35 kDa peroxisomal membrane protein) (RING finger protein 72).	chr8 78057712
NM_000321	M19701	Retinoblastoma susceptibility protein (Fragment).	chr13 47775911
NM_000321	NM_000321	Retinoblastoma-associated protein (PP110) (P105-RB) (RB).	chr13 47775911
NM_000325	NM_000325	n/a	chr4 111758030
NM_000325	NM_153426	Pituitary homeobox 2 (RIEG bicoid-related homeobox transcription factor) (Solurshin) (ALL1-responsive protein ARP1).	chr4 111758030
NM_000325	NM_153427	Paired-like homeodomain transcription factor 2, isoform a.	chr4 111758030
NM_000327	NM_000327	Rod outer segment membrane protein 1 (ROSP1) (Tetraspanin-23) (Tspan- 23).	chr11 62137198
NM_000332	NM_000332	Ataxin-1 (Spinocerebellar ataxia type 1 protein).	chr6 16407322
NM_000337	NM_000337	Delta-sarcoglycan (SG-delta) (35 kDa dystrophin-associated glycoprotein) (35DAG).	chr5 155686344
NM_000344	NM_000344	Survival motor neuron protein (Component of gems 1) (Gemin-1).	chr5 70256523
NM_000344	NM_022874	n/a	chr5 70256523
NM_000344	NM_022875	n/a	chr5 70256523
NM_000344	NM_022877	n/a	chr5 70256523
NM_000346	NM_000346	Transcription factor SOX-9.	chr17 67628755
NM_000347	NM_000347	Spectrin beta chain, erythrocyte (Beta-I spectrin).	chr14 64302901
NM_000356	NM_000356	Treacle protein (Treacher Collins syndrome protein).	chr5 149717427
NM_000356	NM_001008656	Hypothetical protein DKFZp434G1035 (Fragment).	chr5 149717427
NM_000356	NM_001008657	Treacher Collins-Franceschetti syndrome 1, isoform c.	chr5 149717427
NM_000372	NM_000372	Tyrosinase precursor (EC 1.14.18.1) (Monophenol monooxygenase) (Tumor rejection antigen AB) (SK29-AB) (LB24-AB).	chr11 88550687
NM_000381	NM_000381	Midline-1 (EC 6.3.2.-) (Tripartite motif protein 18) (Putative transcription factor XPRF) (Midin) (RING finger protein 59).	chrX 10376165
NM_000381	NM_033291	n/a	chrX 10376165
NM_000382	NM_000382	Fatty aldehyde dehydrogenase (EC 1.2.1.3) (Aldehyde dehydrogenase, microsomal) (Aldehyde dehydrogenase family 3 member A2).	chr17 19492655
NM_000382	NM_001031806	Fatty aldehyde dehydrogenase (EC 1.2.1.3) (Aldehyde dehydrogenase, microsomal) (Aldehyde dehydrogenase family 3 member A2).	chr17 19492655
NM_000383	NM_000383	Autoimmune regulator (Autoimmune polyendocrinopathy candidiasis ectodermal dystrophy protein) (APECED protein).	chr21 44530190
NM_000400	AK130849	Hypothetical protein FLJ27339.	chr19 50546692
NM_000400	NM_000400	TFIIH basal transcription factor complex helicase subunit (EC 3.6.1.-) (DNA-repair protein complementing XP-D cells) (Xeroderma pigmentosum group D complementing protein) (CXPD) (DNA excision repair protein ERCC-2).	chr19 50546685
NM_000404	M27508	Beta-galactosidase-related protein precursor (Beta-galactosidase-like protein) (S-Gal) (Elastin-binding protein) (EBP).	chr3 33013224
NM_000404	NM_000404	Beta-galactosidase precursor (EC 3.2.1.23) (Lactase) (Acid beta- galactosidase).	chr3 33013234
NM_000418	NM_000418	Interleukin-4 receptor alpha chain precursor (IL-4R-alpha) (CD124 antigen) [Contains: Soluble interleukin-4 receptor alpha chain (sIL4Ralpha/prot) (IL-4-binding protein) (IL4-BP)].	chr16 27232751
NM_000419	NM_000419	Integrin alpha-IIb precursor (Platelet membrane glycoprotein IIb) (GPalpha IIb) (GPIIb) (CD41 antigen) [Contains: Integrin alpha-IIb heavy chain; Integrin alpha-IIb light chain].	chr17 39805075
NM_000421	NM_000421	Keratin, type I cytoskeletal 10 (Cytokeratin-10) (CK-10) (Keratin-10) (K10).	chr17 36227895
NM_000434	NM_000434	Sialidase-1 precursor (EC 3.2.1.18) (Lysosomal sialidase) (N-acetyl- alpha-neuraminidase 1) (Acetylneuraminyl hydrolase) (G9 sialidase).	chr6 31934931
NM_000434	NM_000434	Sialidase-1 precursor (EC 3.2.1.18) (Lysosomal sialidase) (N-acetyl- alpha-neuraminidase 1) (Acetylneuraminyl hydrolase) (G9 sialidase).	chr6_cox_hap1 3273206
NM_000434	NM_000434	Sialidase-1 precursor (EC 3.2.1.18) (Lysosomal sialidase) (N-acetyl- alpha-neuraminidase 1) (Acetylneuraminyl hydrolase) (G9 sialidase).	chr6_qbl_hap2 3074690
NM_000438	NM_000438	Hypothetical protein PAX3.	chr2 222866592
NM_000438	NM_013942	Paired box gene 3, isoform PAX3b.	chr2 222866592
NM_000442	NM_000442	Platelet endothelial cell adhesion molecule precursor (PECAM-1) (CD31 antigen) (EndoCAM) (GPIIA').	chr17 59754144
NM_000445	NM_000445	Plectin 1.	chr8 145061308
NM_000445	NM_201378	Plectin 2.	chr8 145061308
NM_000445	NM_201379	Plectin 3.	chr8 145061308
NM_000445	NM_201380	Plectin 1 (PLTN) (PCN) (Hemidesmosomal protein 1) (HD1).	chr8 145061308
NM_000445	NM_201381	Plectin 7.	chr8 145061308
NM_000445	NM_201382	Plectin 8.	chr8 145061308
NM_000445	NM_201383	Plectin 10.	chr8 145061308
NM_000445	NM_201384	Plectin 11.	chr8 145061308
NM_000474	NM_000474	Twist-related protein 1 (H-twist).	chr7 19121617
NM_000475	NM_000475	Nuclear receptor 0B1 (Nuclear receptor DAX-1) (DSS-AHC critical region on the X chromosome protein 1).	chrX 30232506
NM_000499	NM_000499	Cytochrome P450 1A1 (EC 1.14.14.1) (CYPIA1) (P450-P1) (P450 form 6) (P450-C).	chr15 72798943
NM_000520	NM_000520	Beta-hexosaminidase alpha chain precursor (EC 3.2.1.52) (N-acetyl- beta-glucosaminidase) (Beta-N-acetylhexosaminidase) (Hexosaminidase A).	chr15 70422832
NM_000523	NM_000523	Homeobox protein Hox-D13 (Hox-4I).	chr2 176665777
NM_000526	NM_000526	Keratin, type I cytoskeletal 14 (Cytokeratin-14) (CK-14) (Keratin-14) (K14).	chr17 36992058
NM_000536	NM_000536	V(D)J recombination-activating protein 2 (RAG-2).	chr11 36570070
NM_000539	NM_000539	Rhodopsin (Opsin 2).	chr3 130730171
NM_000545	NM_000545	Hepatocyte nuclear factor 1-alpha (HNF-1A) (Liver-specific transcription factor LF-B1) (LFB1) (Transcription factor 1) (TCF-1).	chr12 119900931
NM_000553	NM_000553	Werner syndrome ATP-dependent helicase (EC 3.6.1.-).	chr8 31010319
NM_000565	BC089410	n/a	chr1 152644322
NM_000565	NM_000565	Interleukin-6 receptor alpha chain precursor (IL-6R-alpha) (IL-6R 1) (Membrane glycoprotein 80) (gp80) (CD126 antigen).	chr1 152644292
NM_000566	NM_000566	High affinity immunoglobulin gamma Fc receptor I precursor (Fc-gamma RI) (FcRI) (IgG Fc receptor I) (CD64 antigen).	chr1 148020911
NM_000616	NM_000616	T-cell surface glycoprotein CD4 precursor (T-cell surface antigen T4/Leu-3).	chr12 6769004
NM_000629	NM_000629	Interferon-alpha/beta receptor alpha chain precursor (IFN-alpha-REC).	chr21 33619083
NM_000665	AF334270	ACHE protein.	chr7 100325553
NM_000665	NM_000665	Acetylcholinesterase precursor (EC 3.1.1.7) (AChE).	chr7 100325553
NM_000665	NM_015831	Acetylcholinesterase precursor (EC 3.1.1.7) (AChE).	chr7 100325553
NM_000676	NM_000676	Adenosine A2b receptor.	chr17 15788955
NM_000701	NM_000701	Sodium/potassium-transporting ATPase alpha-1 chain precursor (EC 3.6.3.9) (Sodium pump 1) (Na+/K+ ATPase 1).	chr1 116717358
NM_000701	NM_001001586	ATPase, Na+/K+ transporting, alpha 1 polypeptide (Fragment).	chr1 116717358
NM_000722	NM_000722	Dihydropyridine-sensitive L-type, calcium channel alpha-2/delta subunits precursor [Contains: L-type calcium channel alpha-2 subunit; L-type calcium channel delta subunit].	chr7 81417353
NM_000723	NM_000723	Voltage-dependent L-type calcium channel beta-1 subunit (CAB1) (Calcium channel, voltage-dependent, beta 1 subunit).	chr17 34583234
NM_000725	NM_000725	Voltage-dependent L-type calcium channel beta-3 subunit (CAB3) (Calcium channel, voltage-dependent, beta 3 subunit).	chr12 47498778
NM_000727	NM_000727	Voltage-dependent calcium channel gamma-1 subunit (Dihydropyridine- sensitive L-type, skeletal muscle calcium channel gamma subunit).	chr17 62471167
NM_000733	NM_000733	T-cell surface glycoprotein CD3 epsilon chain precursor (T-cell surface antigen T3/Leu-4 epsilon chain).	chr11 117680661
NM_000740	NM_000740	Muscarinic acetylcholine receptor M3.	chr1 237858995
NM_000747	NM_000747	Acetylcholine receptor protein, beta subunit precursor.	chr17 7289129
NM_000751	NM_000751	Acetylcholine receptor protein, delta subunit precursor.	chr2 233099165
NM_000761	NM_000761	Cytochrome P450 1A2 (EC 1.14.14.1) (CYPIA2) (P450-P3) (P(3)450) (P450 4).	chr15 72828236
NM_000762	NM_000762	Cytochrome P450 2A6 (EC 1.14.14.1) (CYPIIA6) (Coumarin 7-hydroxylase) (P450 IIA3) (CYP2A3) (P450(I)).	chr19 46041283
NM_000764	NM_000764	Cytochrome P450 2A7 (EC 1.14.14.1) (CYPIIA7) (P450-IIA4).	chr19 46073184
NM_000765	NM_000765	Cytochrome P450 3A7 (EC 1.14.14.1) (CYPIIIA7) (P450-HFLA).	chr7 99140596
NM_000766	NM_000766	Cytochrome P450 2A13 (EC 1.14.14.1) (CYPIIA13).	chr19 46286207
NM_000767	NM_000767	Cytochrome P450 2B6 (EC 1.14.14.1) (CYPIIB6) (P450 IIB1).	chr19 46189043
NM_000775	NM_000775	Cytochrome P450 2J2 (EC 1.14.14.1) (CYPIIJ2) (Arachidonic acid epoxygenase).	chr1 60131568
NM_000780	NM_000780	Cytochrome P450 7A1 (Cholesterol 7-alpha-monooxygenase) (CYPVII) (EC 1.14.13.17) (Cholesterol 7-alpha-hydroxylase).	chr8 59565291
NM_000783	NM_000783	Cytochrome P450 26A1 (EC 1.14.-.-) (Retinoic acid-metabolizing cytochrome) (P450 retinoic acid-inactivating 1) (P450RAI) (hP450RAI) (Retinoic acid 4-hydroxylase).	chr10 94823656
NM_000789	NM_000789	Angiotensin-converting enzyme, somatic isoform precursor (EC 3.4.15.1) (Dipeptidyl carboxypeptidase I) (Kininase II) (CD143 antigen) [Contains: Angiotensin-converting enzyme, somatic isoform, soluble form].	chr17 58908165
NM_000809	NM_000809	Gamma-aminobutyric-acid receptor alpha-4 subunit precursor (GABA(A) receptor).	chr4 46615675
NM_000811	NM_000811	Gamma-aminobutyric-acid receptor alpha-6 subunit precursor (GABA(A) receptor).	chr5 161045547
NM_000812	NM_000812	Gamma-aminobutyric-acid receptor beta-1 subunit precursor (GABA(A) receptor).	chr4 46728335
NM_000815	NM_000815	Gamma-aminobutyric-acid receptor delta subunit precursor (GABA(A) receptor).	chr1 1940702
NM_000816	NM_000816	Gamma-aminobutyric-acid receptor gamma-2 subunit precursor (GABA(A) receptor).	chr5 161427294
NM_000816	NM_198903	Gamma-aminobutyric ACIDA receptor gamma 2 short form subunit (Fragment).	chr5 161427294
NM_000816	NM_198904	Gamma-aminobutyric-acid receptor gamma-2 subunit precursor (GABA(A) receptor).	chr5 161427294
NM_000824	NM_000824	Glycine receptor beta chain precursor (Glycine receptor 58 kDa subunit).	chr4 158216787
NM_000830	NM_000830	Glutamate receptor, ionotropic kainate 1 precursor (Glutamate receptor 5) (GluR-5) (GluR5) (Excitatory amino acid receptor 3) (EAA3).	chr21 29847736
NM_000834	NM_000834	Glutamate [NMDA] receptor subunit epsilon 2 precursor (N-methyl D- aspartate receptor subtype 2B) (NR2B) (NMDAR2B) (N-methyl-D-aspartate receptor subunit 3) (NR3) (hNR3).	chr12 13605410
NM_000836	NM_000836	Glutamate [NMDA] receptor subunit epsilon 4 precursor (N-methyl D- aspartate receptor subtype 2D) (NR2D) (NMDAR2D) (EB11).	chr19 53589943
NM_000868	BC028688	5-hydroxytryptamine (Serotonin) receptor 2C.	chrX 113724810
NM_000868	NM_000868	5-hydroxytryptamine 2C receptor (5-HT-2C) (Serotonin receptor 2C) (5- HT2C) (5-HTR2C) (5HT-1C).	chrX 113724806
NM_000873	NM_000873	Intercellular adhesion molecule 2 precursor (ICAM-2) (CD102 antigen).	chr17 59433687
NM_000876	NM_000876	Cation-independent mannose-6-phosphate receptor precursor (CI Man-6-P receptor) (CI-MPR) (M6PR) (Insulin-like growth factor II receptor) (300 kDa mannose 6-phosphate receptor) (MPR 300) (MPR300) (CD222 antigen).	chr6 160310120
NM_000877	NM_000877	Interleukin-1 receptor type I precursor (IL-1R-1) (IL-1RT1) (IL-1R- alpha) (p80) (Antigen CD121a).	chr2 102136833
NM_000878	NM_000878	Interleukin-2 receptor beta chain precursor (IL-2 receptor) (P70-75) (p75) (High affinity IL-2 receptor beta subunit) (CD122 antigen).	chr22 35851827
NM_000888	NM_000888	Integrin beta-6 precursor.	chr2 160666479
NM_000889	NM_000889	Integrin beta-7 precursor.	chr12 51871374
NM_000906	NM_000906	Atrial natriuretic peptide receptor A precursor (ANP-A) (ANPRA) (GC-A) (Guanylate cyclase) (EC 4.6.1.2) (NPR-A) (Atrial natriuretic peptide A-type receptor).	chr1 151917736
NM_000917	NM_000917	Procollagen-proline, 2-oxoglutarate 4-dioxygenase (Proline 4- hydroxylase), alpha polypeptide I variant.	chr10 74436987
NM_000917	NM_001017962	Prolyl 4-hydroxylase alpha-1 subunit precursor (EC 1.14.11.2) (4-PH alpha-1) (Procollagen-proline,2-oxoglutarate-4-dioxygenase alpha-1 subunit).	chr10 74436987
NM_000919	NM_000919	Peptidyl-glycine alpha-amidating monooxygenase precursor (EC 1.14.17.3) (PAM).	chr5 102229425
NM_000919	NM_138766	Peptidylglycine alpha-amidating monooxygenase (EC 1.14.17.3) (Fragment).	chr5 102229425
NM_000919	NM_138821	Peptidylglycine alpha-amidating monooxygenase (Fragment).	chr5 102229425
NM_000919	NM_138822	Peptidylglycine alpha-amidating monooxygenase (EC 1.14.17.3) (Fragment).	chr5 102229425
NM_000935	NM_000935	Procollagen-lysine,2-oxoglutarate 5-dioxygenase 2 precursor (EC 1.14.11.4) (Lysyl hydroxylase 2) (LH2).	chr3 147269917
NM_000935	NM_182943	Procollagen-lysine,2-oxoglutarate 5-dioxygenase 2 precursor (EC 1.14.11.4) (Lysyl hydroxylase 2) (LH2).	chr3 147269917
NM_000961	NM_000961	Prostacyclin synthase (EC 5.3.99.4) (Prostaglandin I2 synthase).	chr20 47553817
NM_000962	NM_000962	Prostaglandin G/H synthase 1 precursor (EC 1.14.99.1) (Cyclooxygenase- 1) (COX-1) (Prostaglandin-endoperoxide synthase 1) (Prostaglandin H2 synthase 1) (PGH synthase 1) (PGHS-1) (PHS 1).	chr9 124173049
NM_000962	NM_080591	Prostaglandin-endoperoxide synthase 1 (Prostaglandin G/H synthase and cyclooxygenase).	chr9 124173049
NM_000964	NM_000964	Retinoic acid receptor alpha (RAR-alpha).	chr17 35718971
NM_000966	NM_000966	Retinoic acid receptor gamma-1 (RAR-gamma-1).	chr12 51890620
NM_000983	NM_000983	60S ribosomal protein L22 (Epstein-Barr virus small RNA associated protein) (EBER associated protein) (EAP) (Heparin binding protein HBp15).	chr1 6167667
NM_000986	NM_000986	60S ribosomal protein L24 (Ribosomal protein L30).	chr3 102882623
NM_001001976	NM_001001976	Arginyl-tRNA--protein transferase 1 (EC 2.3.2.8) (R-transferase 1) (Arginyltransferase 1) (Arginine-tRNA--protein transferase 1).	chr10 123492615
NM_001001976	NM_007041	Arginyltransferase 1.	chr10 123492615
NM_001001998	NM_001001998	Exosome component 10 (Polymyositis/scleroderma autoantigen 2) (Autoantigen PM/Scl 2) (Polymyositis/scleroderma autoantigen 100 kDa) (PM/Scl-100) (P100 polymyositis-scleroderma overlap syndrome associated autoantigen).	chr1 11049264
NM_001001998	NM_002685	Polymyositis/scleroderma autoantigen 2, 100kDa.	chr1 11049264
NM_001002269	NM_001002269	Apoptosis-related protein PNAS-3 (Fragment).	chr9 37770307
NM_001002269	NM_016042	Exosome complex exonuclease RRP40 (EC 3.1.13.-) (Ribosomal RNA- processing protein 40) (Exosome component 3) (p10).	chr9 37770307
NM_001002294	NM_001002294	Dimethylaniline monooxygenase [N-oxide-forming] 3 (EC 1.14.13.8) (Hepatic flavin-containing monooxygenase 3) (FMO 3) (Dimethylaniline oxidase 3) (FMO form 2) (FMO II).	chr1 169326659
NM_001002841	NM_001002841	Myosin light polypeptide 4 (Myosin light chain 1, embryonic muscle/atrial isoform) (Myosin light chain alkali, GT-1 isoform).	chr17 42641426
NM_001002857	NM_001002857	Annexin A2 (Annexin II) (Lipocortin II) (Calpactin I heavy chain) (Chromobindin-8) (p36) (Protein I) (Placental anticoagulant protein IV) (PAP-IV).	chr15 58426643
NM_001002857	NM_001002858	Annexin A2 (Annexin II) (Lipocortin II) (Calpactin I heavy chain) (Chromobindin-8) (p36) (Protein I) (Placental anticoagulant protein IV) (PAP-IV).	chr15 58426643
NM_001002880	NM_001002880	Chibby protein (PKD2 interactor, Golgi and endoplasmic reticulum associated 1) (PIGEA-14) (Cytosolic leucine-rich protein) (HRIHFB2025).	chr22 37382603
NM_001003800	NM_001003800	Cytoskeleton-like bicaudal D protein homolog 2.	chr9 94513466
NM_001003800	NM_015250	Cytoskeleton-like bicaudal D protein homolog 2.	chr9 94513466
NM_001003810	NM_001003810	P37 AUF1.	chr4 83493490
NM_001003810	NM_002138	P37 AUF1.	chr4 83493490
NM_001003810	NM_031369	P37 AUF1.	chr4 83493490
NM_001003810	NM_031370	Heterogeneous nuclear ribonucleoprotein D0 (hnRNP D0) (AU-rich element RNA-binding protein 1).	chr4 83493490
NM_001005291	NM_001005291	Sterol regulatory element binding protein 1 (SREBP-1) (Sterol regulatory element-binding transcription factor 1).	chr17 17656110
NM_001005291	NM_004176	Sterol regulatory element binding protein 1 (SREBP-1) (Sterol regulatory element-binding transcription factor 1).	chr17 17656110
NM_001005376	NM_001005376	PLAUR protein.	chr19 48842087
NM_001005386	NM_001005386	Actin-like protein 2 (Actin-related protein 2).	chr2 65308405
NM_001005386	NM_005722	Actin-like protein 2 (Actin-related protein 2).	chr2 65308405
NM_001005609	AF061192	Ectodysplasin A.	chrX 68752635
NM_001005609	AF061194	Ectodysplasin A.	chrX 68752635
NM_001005609	NM_001005609	Ectodysplasin A (Ectodermal dysplasia protein) (EDA protein) [Contains: Ectodysplasin A, membrane form; Ectodysplasin A, secreted form].	chrX 68752635
NM_001005609	NM_001005610	Ectodysplasin A.	chrX 68752635
NM_001005609	NM_001399	Ectodysplasin A (Ectodermal dysplasia protein) (EDA protein) [Contains: Ectodysplasin A, membrane form; Ectodysplasin A, secreted form].	chrX 68752635
NM_001006610	NM_001006610	Ubiquitin ligase SIAH1 (EC 6.3.2.-) (Seven in absentia homolog 1) (Siah-1) (Siah-1a).	chr16 46951946
NM_001006610	NM_003031	Ubiquitin ligase SIAH1 (EC 6.3.2.-) (Seven in absentia homolog 1) (Siah-1) (Siah-1a).	chr16 46951954
NM_001006946	NM_001006946	Syndecan-1 precursor (SYND1) (CD138 antigen).	chr2 20264040
NM_001007097	NM_001007097	Neurotrophic tyrosine kinase, receptor, type 2.	chr9 86474445
NM_001007278	NM_001007278	Ret finger protein 2 (Leukemia associated protein 5) (B-cell chronic lymphocytic leukemia tumor suppressor Leu5) (Putative tumor suppressor RFP2) (Tripartite motif protein 13) (RING finger protein 77).	chr13 49469143
NM_001007278	NM_213590	Ret finger protein 2 (Leukemia associated protein 5) (B-cell chronic lymphocytic leukemia tumor suppressor Leu5) (Putative tumor suppressor RFP2) (Tripartite motif protein 13) (RING finger protein 77).	chr13 49469143
NM_001008405	NM_001008405	B-cell receptor-associated protein 29 (BCR-associated protein Bap29).	chr7 107007945
NM_001008405	NM_018844	B-cell receptor-associated protein 29 (BCR-associated protein Bap29).	chr7 107007945
NM_001008566	NM_001008566	Protein-tyrosine sulfotransferase 2 (EC 2.8.2.20) (Tyrosylprotein sulfotransferase-2) (TPST-2).	chr22 25251715
NM_001008697	NM_001008697	Tuftelin-interacting protein 11.	chr22 25217896
NM_001011545	NM_001011545	Transcription factor BACH1t (Fragment).	chr21 29599430
NM_001012511	NM_001012511	Golgi SNAP receptor complex member 2, isoform C.	chr17 42355484
NM_001012511	NM_004287	Golgi SNAP receptor complex member 2 (27 kDa Golgi SNARE protein) (Membrin).	chr17 42355484
NM_001012511	NM_054022	n/a	chr17 42355484
NM_001014796	NM_001014796	Discoidin domain receptor 2 precursor (EC 2.7.1.112) (Receptor protein-tyrosine kinase TKT) (Tyrosine-protein kinase TYRO 10) (Neurotrophic tyrosine kinase, receptor-related 3).	chr1 160868851
NM_001015051	NM_001015051	OTTHUMP00000016535 (Fragment).	chr6 45404031
NM_001015051	NM_001024630	Runt-related transcription factor 2 (Core-binding factor, alpha 1 subunit) (CBF-alpha 1) (Acute myeloid leukemia 3 protein) (Oncogene AML-3) (Polyomavirus enhancer binding protein 2 alpha A subunit) (PEBP2-alpha A) (PEA2-alpha A) (SL3-3 enhancer factor 1	chr6 45404031
NM_001017418	NM_001017418	Small proline-rich protein 2B (SPR-2B).	chr1 151309340
NM_001017520	NM_001017520	DNA nucleotidylexotransferase (EC 2.7.7.31) (Terminal addition enzyme) (Terminal deoxynucleotidyltransferase) (Terminal transferase).	chr10 98054074
NM_001017520	NM_004088	DNA nucleotidylexotransferase (EC 2.7.7.31) (Terminal addition enzyme) (Terminal deoxynucleotidyltransferase) (Terminal transferase).	chr10 98054074
NM_001017926	NM_001017926	Zinc fingers and homeoboxes protein 1.	chr8 124329877
NM_001017979	BC018067	RAB28 protein.	chr4 12978446
NM_001017979	NM_001017979	Ras-related protein Rab-28 (Rab-26).	chr4 12978480
NM_001043	NM_001043	Sodium-dependent noradrenaline transporter (Norepinephrine transporter) (NET).	chr16 54248056
NM_001044	NM_001044	Sodium-dependent dopamine transporter (DA transporter) (DAT).	chr5 1445908
NM_001045	NM_001045	Sodium-dependent serotonin transporter (5HT transporter) (5HTT).	chr17 25549033
NM_001046	BC033003	Solute carrier family 12 member 2 (Bumetanide-sensitive sodium- (potassium)-chloride cotransporter 1) (Basolateral Na-K-Cl symporter).	chr5 127447384
NM_001046	NM_001046	Solute carrier family 12 member 2 (Bumetanide-sensitive sodium- (potassium)-chloride cotransporter 1) (Basolateral Na-K-Cl symporter).	chr5 127447381
NM_001049	BX248780	Full-length cDNA 5-PRIME end of clone CS0DK011YG11 of HeLa cells of Homo sapiens (human).	chr14 37746954
NM_001049	NM_001049	Somatostatin receptor type 1 (SS1R) (SRIF-2).	chr14 37746954
NM_001050	NM_001050	Somatostatin receptor type 2 (SS2R) (SRIF-1).	chr17 68672754
NM_001058	NM_001058	Substance-P receptor (SPR) (NK-1 receptor) (NK-1R) (Tachykinin receptor 1).	chr2 75129737
NM_001059	NM_001059	Neuromedin K receptor (NKR) (Neurokinin B receptor) (NK-3 receptor) (NK-3R) (Tachykinin receptor 3).	chr4 104730073
NM_001065	AK056611	Tumor necrosis factor receptor superfamily member 1A precursor (p60) (TNF-R1) (TNF-RI) (TNFR-I) (p55) (CD120a antigen) [Contains: Tumor necrosis factor receptor superfamily member 1A, membrane form; Tumor necrosis factor-binding protein 1 (TBPI)].	chr12 6308200
NM_001065	NM_001065	Tumor necrosis factor receptor superfamily member 1A precursor (p60) (TNF-R1) (TNF-RI) (TNFR-I) (p55) (CD120a antigen) [Contains: Tumor necrosis factor receptor superfamily member 1A, membrane form; Tumor necrosis factor-binding protein 1 (TBPI)].	chr12 6308184
NM_001067	NM_001067	DNA topoisomerase 2-alpha (EC 5.99.1.3) (DNA topoisomerase II, alpha isozyme).	chr17 35798323
NM_001068	NM_001068	DNA topoisomerase 2-beta (EC 5.99.1.3) (DNA topoisomerase II, beta isozyme).	chr3 25614478
NM_001070	NM_001070	Tubulin gamma-1 chain (Gamma-1 tubulin) (Gamma-tubulin complex component 1) (GCP-1).	chr17 38015219
NM_001077	NM_001077	UDP-glucuronosyltransferase 2B17 precursor (EC 2.4.1.17) (UDPGT) (C19- steroid-specific UDP-glucuronosyltransferase).	chr4 69085499
NM_001078	NM_001078	Vascular cell adhesion protein 1 precursor (V-CAM 1) (CD106 antigen) (INCAM-100).	chr1 100957884
NM_001078	NM_080682	Hypothetical protein DKFZp779G2333 (Fragment).	chr1 100957884
NM_001082	NM_001082	Cytochrome P450 4F2 (EC 1.14.13.30) (CYPIVF2) (Leukotriene-B(4) omega- hydroxylase) (Leukotriene-B(4) 20-monooxygenase) (Cytochrome P450-LTB- omega).	chr19 15849833
NM_001084	NM_001084	Procollagen-lysine,2-oxoglutarate 5-dioxygenase 3 precursor (EC 1.14.11.4) (Lysyl hydroxylase 3) (LH3).	chr7 100635978
NM_001094	NM_001094	Amiloride-sensitive cation channel 1, neuronal (Amiloride-sensitive brain sodium channel) (Amiloride-sensitive cation channel neuronal 1) (Acid-sensing ion channel 2) (ASIC2) (Brain sodium channel 1) (BNaC1) (BNC1) (Mammalian degenerin homolog).	chr17 28364220
NM_001102	NM_001102	Alpha-actinin 1 (Alpha-actinin cytoskeletal isoform) (Non-muscle alpha-actinin 1) (F-actin cross linking protein).	chr14 68410792
NM_001110	NM_001110	ADAM 10 precursor (EC 3.4.24.81) (A disintegrin and metalloproteinase domain 10) (Mammalian disintegrin-metalloprotease) (Kuzbanian protein homolog) (CDw156c antigen).	chr15 56675801
NM_001116	NM_001116	Adenylate cyclase type IX (EC 4.6.1.1) (ATP pyrophosphate-lyase 9) (Adenylyl cyclase 9).	chr16 3952653
NM_001118	NM_001118	Pituitary adenylate cyclase-activating polypeptide type I receptor precursor (PACAP type I receptor) (PACAP-R-1).	chr7 31058666
NM_001121	NM_001121	Adducin 3 (Gamma) (Hypothetical protein DKFZp686O0853).	chr10 111757700
NM_001121	NM_016824	Gamma-adducin (Adducin-like protein 70).	chr10 111757700
NM_001144	NM_001144	Autocrine motility factor receptor, isoform 2 (EC 6.3.2.-) (AMF receptor) (gp78).	chr16 54952865
NM_001164	NM_001164	Amyloid beta A4 precursor protein-binding family B member 1 (Fe65 protein).	chr11 6372930
NM_001164	NM_145689	Amyloid beta A4 precursor protein-binding family B member 1 (Fe65 protein).	chr11 6372930
NM_001167	NM_001167	Baculoviral IAP repeat-containing protein 4 (Inhibitor of apoptosis protein 3) (X-linked inhibitor of apoptosis protein) (X-linked IAP) (IAP-like protein) (HILP).	chrX 122821728
NM_001169	NM_001169	Aquaporin-8 (AQP-8).	chr16 25135785
NM_001170	BC062701	Aquaporin 7 (Fragment).	chr9 33374950
NM_001170	NM_001170	Aquaporin-7 (AQP-7) (Aquaporin-7-like) (Aquaporin adipose) (AQPap).	chr9 33374948
NM_001189	NM_001189	Homeobox protein Nkx-3.2 (Bagpipe homeobox protein homolog 1).	chr4 13151551
NM_001211	NM_001211	Mitotic checkpoint serine/threonine-protein kinase BUB1 beta (EC 2.7.1.37) (hBUBR1) (MAD3/BUB1-related protein kinase) (Mitotic checkpoint kinase MAD3L) (SSK1).	chr15 38240529
NM_001216	NM_001216	Carbonic anhydrase 9 precursor (EC 4.2.1.1) (Carbonic anhydrase IX) (Carbonate dehydratase IX) (CA-IX) (CAIX) (Membrane antigen MN) (P54/58N) (Renal cell carcinoma-associated antigen G250) (RCC- associated antigen G250) (pMW1).	chr9 35663914
NM_001219	NM_001219	Calumenin precursor (Crocalbin) (IEF SSP 9302).	chr7 128166671
NM_001233	NM_001233	Caveolin-2.	chr7 115926679
NM_001237	NM_001237	Cyclin-A2 (Cyclin-A).	chr4 122957974
NM_001239	NM_001239	Cyclin-H (MO15-associated protein) (p37) (p34).	chr5 86725838
NM_001240	NM_001240	Cyclin-T1 (Cyclin-T) (CycT1).	chr12 47373018
NM_001242	NM_001242	Tumor necrosis factor receptor superfamily member 7 precursor (CD27L receptor) (T-cell activation antigen CD27) (T14).	chr12 6424326
NM_001245	NM_001245	Sialic acid-binding Ig-like lectin 6 precursor (Siglec-6) (Obesity- binding protein 1) (OB-BP1) (CD33 antigen-like 1) (CDw327 antigen).	chr19 56712885
NM_001249	NM_001249	Ectonucleoside triphosphate diphosphohydrolase 5 precursor (EC 3.6.1.6) (NTPDase5) (Nucleoside diphosphatase) (CD39 antigen-like 4) (ER-UDPase).	chr14 73502935
NM_001251	BX647524	n/a	chr17 7423680
NM_001251	NM_001251	Macrosialin precursor (CD68 antigen) (GP110).	chr17 7423707
NM_001265	NM_001265	Homeobox protein CDX-2 (Caudal-type homeobox protein 2) (CDX-3).	chr13 27434278
NM_001270	NM_001270	Chromodomain-helicase-DNA-binding protein 1 (EC 3.6.1.-) (ATP- dependent helicase CHD1) (CHD-1).	chr5 98218808
NM_001274	NM_001274	Serine/threonine-protein kinase Chk1 (EC 2.7.1.37).	chr11 125001546
NM_001279	NM_001279	Cell death activator CIDE-A (Cell death-inducing DFFA-like effector A).	chr18 12244369
NM_001283	NM_001283	Adapter-related protein complex 1 sigma 1A subunit (Sigma-adaptin 1A) (Adaptor protein complex AP-1 sigma-1A subunit) (Golgi adaptor HA1/AP1 adaptin sigma-1A subunit) (Clathrin assembly protein complex 1 sigma- 1A small chain) (Clathrin coat assembly prot	chr7 100584486
NM_001283	NM_057089	Adaptor-related protein complex 1, sigma 1 subunit.	chr7 100584486
NM_001305	NM_001305	Claudin-4 (Clostridium perfringens enterotoxin receptor) (CPE- receptor) (CPE-R) (Williams-Beuren syndrome chromosome region 8 protein).	chr7 72883128
NM_001306	NM_001306	Claudin-3 (Clostridium perfringens enterotoxin receptor 2) (CPE- receptor 2) (CPE-R 2) (Ventral prostate.1 protein homolog) (HRVP1).	chr7 72821263
NM_001307	NM_001307	Claudin-7 (CLDN-7).	chr17 7104183
NM_001315	NM_001315	Protein-serine/threonine kinase (Fragment).	chr6 36103550
NM_001315	NM_139012	Mitogen-activated protein kinase 14 (EC 2.7.1.37) (Mitogen-activated protein kinase p38 alpha) (MAP kinase p38 alpha) (Cytokine suppressive anti-inflammatory drug binding protein) (CSAID-binding protein) (CSBP) (MAX-interacting protein 2) (MAP kinase MXI2	chr6 36103550
NM_001315	NM_139013	Protein-serine/threonine kinase (Fragment).	chr6 36103550
NM_001315	NM_139014	Protein-serine/threonine kinase (Fragment).	chr6 36103550
NM_001316	NM_001316	Importin-alpha re-exporter (Chromosome segregation 1-like protein) (Cellular apoptosis susceptibility protein).	chr20 47096244
NM_001321	NM_001321	Cysteine and glycine-rich protein 2 (Cysteine-rich protein 2) (CRP2) (Smooth muscle cell LIM protein) (SmLIM) (LIM-only protein 5).	chr12 75776626
NM_001332	NM_001332	Catenin delta-2 (Delta-catenin) (Neural plakophilin-related ARM-repeat protein) (NPRAP) (Neurojungin) (GT24).	chr5 11024951
NM_001333	NM_001333	Cathepsin L2 precursor (EC 3.4.22.43) (Cathepsin V) (Cathepsin U).	chr9 98834760
NM_001336	NM_001336	Cathepsin Z precursor (EC 3.4.22.-) (Cathepsin X) (Cathepsin P).	chr20 57003635
NM_001348	NM_001348	Death-associated protein kinase 3 (EC 2.7.1.37) (DAP kinase 3) (DAP- like kinase) (Dlk) (ZIP-kinase).	chr19 3909451
NM_001350	NM_001350	Death domain-associated protein 6 (Daxx) (hDaxx) (Fas death domain- associated protein) (ETS1 associated protein 1) (EAP1).	chr6 33394378
NM_001350	NM_001350	Death domain-associated protein 6 (Daxx) (hDaxx) (Fas death domain- associated protein) (ETS1 associated protein 1) (EAP1).	chr6_cox_hap1 4666545
NM_001350	NM_001350	Death domain-associated protein 6 (Daxx) (hDaxx) (Fas death domain- associated protein) (ETS1 associated protein 1) (EAP1).	chr6_qbl_hap2 4472598
NM_001352	NM_001352	D-site-binding protein (Albumin D box-binding protein) (TAXREB302).	chr19 53825758
NM_001360	NM_001360	7-dehydrocholesterol reductase (EC 1.3.1.21) (7-DHC reductase) (Sterol delta-7-reductase) (Putative sterol reductase SR-2).	chr11 70823110
NM_001375	NM_001375	Deoxyribonuclease II alpha precursor (EC 3.1.22.1) (DNase II alpha) (Acid DNase) (Lysosomal DNase II) (R31240_2).	chr19 12847024
NM_001406	NM_001406	Ephrin-B3 precursor (EPH-related receptor tyrosine kinase ligand 8) (LERK-8) (EPH-related receptor transmembrane ligand ELK-L3).	chr17 7549244
NM_001426	NM_001426	Homeobox protein engrailed-1 (Hu-En-1).	chr2 119316236
NM_001436	NM_001436	Fibrillarin (34 kDa nucleolar scleroderma antigen).	chr19 45016937
NM_001448	NM_001448	Glypican-4 precursor (K-glypican).	chrX 132262729
NM_001451	NM_001451	Forkhead box protein F1 (Forkhead-related protein FKHL5) (Forkhead- related transcription factor 1) (FREAC-1) (Forkhead-related activator- 1).	chr16 85101658
NM_001463	NM_001463	Secreted frizzled-related protein 3 precursor (sFRP-3) (Frizzled- related protein 1) (FrzB-1) (Frezzled) (Fritz).	chr2 183406981
NM_001465	NM_001465	FYN-binding protein (FYN-T-binding protein) (FYB-120/130) (p120/p130) (SLP-76 associated phosphoprotein) (SLAP-130).	chr5 39141114
NM_001465	NM_199335	FYN-binding protein (FYN-T-binding protein) (FYB-120/130) (p120/p130) (SLP-76 associated phosphoprotein) (SLAP-130).	chr5 39141114
NM_001466	NM_001466	Frizzled 2 precursor (Frizzled-2) (Fz-2) (hFz2) (FzE2).	chr17 39990450
NM_001481	NM_001481	Growth-arrest-specific protein 8 (Growth arrest-specific 11).	chr16 88616508
NM_001490	NM_001490	Beta-1,3-galactosyl-O-glycosyl-glycoprotein beta-1,6-N- acetylglucosaminyltransferase (EC 2.4.1.102) (Core 2 branching enzyme) (Core2-GlcNAc-transferase) (C2GNT) (Core 2 GNT).	chr9 78263965
NM_001491	NM_001491	N-acetyllactosaminide beta-1,6-N-acetylglucosaminyl-transferase (EC 2.4.1.150) (N-acetylglucosaminyltransferase) (I-branching enzyme) (IGNT).	chr6 10663934
NM_001503	NM_001503	Phosphatidylinositol-glycan-specific phospholipase D 1 precursor (EC 3.1.4.50) (PI-G PLD) (Glycoprotein phospholipase D) (Glycosyl- phosphatidylinositol-specific phospholipase D).	chr6 24536383
NM_001517	AB209479	Hypothetical protein FLJ21965.	chr6_qbl_hap2 2122950
NM_001517	NM_001517	TFIIH basal transcription factor complex p52 subunit (Basic transcription factor 52 kDa subunit) (BTF2-p52) (General transcription factor IIH polypeptide 4).	chr6 30983955
NM_001517	NM_001517	TFIIH basal transcription factor complex p52 subunit (Basic transcription factor 52 kDa subunit) (BTF2-p52) (General transcription factor IIH polypeptide 4).	chr6_cox_hap1 2324558
NM_001517	NM_001517	TFIIH basal transcription factor complex p52 subunit (Basic transcription factor 52 kDa subunit) (BTF2-p52) (General transcription factor IIH polypeptide 4).	chr6_qbl_hap2 2122908
NM_001530	NM_001530	Hypoxia-inducible factor 1 alpha (HIF-1 alpha) (HIF1 alpha) (ARNT interacting protein) (Member of PAS protein 1) (MOP1).	chr14 61231991
NM_001530	NM_181054	n/a	chr14 61231991
NM_001546	NM_001546	DNA-binding protein inhibitor ID-4 (Inhibitor of DNA binding 4).	chr6 19945595
NM_001558	NM_001558	Interleukin-10 receptor alpha chain precursor (IL-10R-A) (IL-10R1).	chr11 117362318
NM_001561	NM_001561	Tumor necrosis factor receptor superfamily member 9 precursor (4-1BB ligand receptor) (T-cell antigen 4-1BB homolog) (T-cell antigen ILA) (CD137 antigen).	chr1 7902494
NM_001610	NM_001610	Lysosomal acid phosphatase precursor (EC 3.1.3.2) (LAP).	chr11 47217428
NM_001611	NM_001611	Tartrate-resistant acid phosphatase type 5 precursor (EC 3.1.3.2) (TR- AP) (Tartrate-resistant acid ATPase) (TrATPase) (Acid phosphatase 5, tartrate resistant).	chr19 11546476
NM_001633	NM_001633	AMBP protein precursor [Contains: Alpha-1-microglobulin (Protein HC) (Complex-forming glycoprotein heterogeneous in charge) (Alpha-1 microglycoprotein); Inter-alpha-trypsin inhibitor light chain (ITI-LC) (Bikunin) (HI-30)].	chr9 115862230
NM_001641	NM_001641	DNA-(apurinic or apyrimidinic site) lyase (EC 4.2.99.18) (AP endonuclease 1) (APEX nuclease) (APEN) (REF-1 protein).	chr14 19993129
NM_001650	NM_001650	Aquaporin-4 (AQP-4) (WCH4) (Mercurial-insensitive water channel) (MIWC).	chr18 22686004
NM_001650	NM_004028	n/a	chr18 22686004
NM_001656	NM_001656	GTP-binding protein ARD-1 (ADP-ribosylation factor domain protein 1) (Tripartite motif protein 23) (RING finger protein 46).	chr5 64921264
NM_001656	NM_033227	n/a	chr5 64921264
NM_001656	NM_033228	n/a	chr5 64921264
NM_001660	NM_001660	ADP-ribosylation factor 4.	chr3 57532129
NM_001664	NM_001664	Transforming protein RhoA (H12).	chr3 49371584
NM_001675	NM_001675	Cyclic AMP-dependent transcription factor ATF-4 (Activating transcription factor 4) (DNA-binding protein TAXREB67) (Cyclic AMP response element-binding protein 2) (CREB2).	chr22 38246514
NM_001708	NM_001708	Blue-sensitive opsin (BOP) (Blue cone photoreceptor pigment).	chr7 128199782
NM_001722	NM_001722	DNA-directed RNA polymerase III 47 kDa polypeptide (EC 2.7.7.6) (RNA polymerase C subunit 4) (RPC4) (RPC53) (BN51 protein).	chr8 22158563
NM_001730	NM_001730	Krueppel-like factor 5 (Intestinal-enriched krueppel-like factor) (Colon krueppel-like factor) (Transcription factor BTEB2) (Basic transcription element binding protein 2) (BTE-binding protein 2) (GC box binding protein 2).	chr13 72531142
NM_001732	BC096315	BTN1A1 protein.	chr6 26609473
NM_001732	NM_001732	Butyrophilin subfamily 1 member A1 precursor (BT).	chr6 26609427
NM_001746	AK129990	Hypothetical protein FLJ26480.	chr5 179058583
NM_001746	NM_001746	Calnexin precursor (Major histocompatibility complex class I antigen- binding protein p88) (p90) (IP90).	chr5 179058535
NM_001747	NM_001747	Macrophage capping protein (Actin-regulatory protein CAP-G).	chr2 85475381
NM_001755	NM_001755	Core-binding factor, beta subunit (CBF-beta) (Polyomavirus enhancer binding protein 2 beta subunit) (PEBP2-beta) (PEA2-beta) (SL3-3 enhancer factor 1 beta subunit) (SL3/AKV core-binding factor beta subunit).	chr16 65620550
NM_001755	NM_022845	Core binding factor beta isoform PEBP2B.	chr16 65620550
NM_001759	NM_001759	G1/S-specific cyclin-D2.	chr12 4253198
NM_001760	AK055519	Cyclin D3.	chr6 42010671
NM_001760	NM_001760	G1/S-specific cyclin-D3.	chr6 42010649
NM_001761	NM_001761	G2/mitotic-specific cyclin-F.	chr16 2419440
NM_001765	NM_001765	T-cell surface glycoprotein CD1c precursor (CD1c antigen).	chr1 156526427
NM_001767	NM_001767	T-cell surface antigen CD2 precursor (T-cell surface antigen T11/Leu- 5) (LFA-2) (LFA-3 receptor) (Erythrocyte receptor) (Rosette receptor).	chr1 117098624
NM_001768	NM_001768	T-cell surface glycoprotein CD8 alpha chain precursor (T-lymphocyte differentiation antigen T8/Leu-2).	chr2 86865244
NM_001768	NM_171827	n/a	chr2 86865244
NM_001769	NM_001769	CD9 antigen (p24) (Leukocyte antigen MIC3) (Motility-related protein) (MRP-1) (Tetraspanin-29) (Tspan-29).	chr12 6179815
NM_001790	NM_001790	M-phase inducer phosphatase 3 (EC 3.1.3.48) (Dual specificity phosphatase Cdc25C).	chr5 137648857
NM_001790	NM_022809	n/a	chr5 137648857
NM_001798	NM_001798	Cell division protein kinase 2 (EC 2.7.1.37) (p33 protein kinase).	chr12 54646825
NM_001798	NM_052827	D-HSCDK2.	chr12 54646825
NM_001799	NM_001799	Cell division protein kinase 7 (EC 2.7.1.37) (CDK-activating kinase) (CAK) (TFIIH basal transcription factor complex kinase subunit) (39 kDa protein kinase) (P39 Mo15) (STK1) (CAK1).	chr5 68566470
NM_001799	NM_001799	Cell division protein kinase 7 (EC 2.7.1.37) (CDK-activating kinase) (CAK) (TFIIH basal transcription factor complex kinase subunit) (39 kDa protein kinase) (P39 Mo15) (STK1) (CAK1).	chr5_h2_hap1 25463
NM_001804	BC096250	Hypothetical protein.	chr5 149526553
NM_001804	NM_001804	Homeobox protein CDX-1 (Caudal-type homeobox protein 1).	chr5 149526551
NM_001804	U51095	CDX1 protein.	chr5 149526551
NM_001816	NM_001816	Carcinoembryonic antigen-related cell adhesion molecule 8 precursor (Carcinoembryonic antigen CGM6) (Nonspecific cross-reacting antigen NCA-95) (Antigen CD67) (CD66b antigen).	chr19 47776234
NM_001833	NM_001833	Clathrin, light polypeptide (Lca).	chr9 36180971
NM_001833	NM_007096	Clathrin light chain A (Lca).	chr9 36180988
NM_001845	NM_001845	Collagen alpha-1(IV) chain precursor.	chr13 109599311
NM_001851	NM_001851	Collagen alpha-1(IX) chain precursor.	chr6 70982529
NM_001851	NM_078485	Collagen, type IX, alpha 1 (Fragment).	chr6 70982529
NM_001852	NM_001852	Collagen alpha-2(IX) chain precursor.	chr1 40538749
NM_001854	NM_001854	Collagen alpha-1(XI) chain precursor.	chr1 103115582
NM_001854	NM_080629	Alpha 1 type XI collagen isoform C preproprotein variant (Fragment).	chr1 103115582
NM_001854	NM_080630	Alpha 1 type XI collagen isoform C preproprotein variant (Fragment).	chr1 103115582
NM_001885	NM_001885	Alpha crystallin B chain (Alpha(B)-crystallin) (Rosenthal fiber component) (Heat-shock protein beta-5) (HspB5).	chr11 111284559
NM_001904	NM_001904	Beta-catenin.	chr3 41216015
NM_001941	NM_001941	Desmocollin-3 precursor (Desmocollin-4) (HT-CP).	chr18 26825028
NM_001941	NM_024423	Desmocollin-3 precursor (Desmocollin-4) (HT-CP).	chr18 26825028
NM_001942	NM_001942	Desmoglein-1 precursor (Desmosomal glycoprotein 1) (DG1) (DGI) (Pemphigus foliaceus antigen).	chr18 27152049
NM_001943	NM_001943	Desmoglein-2 precursor (HDGC).	chr18 27332202
NM_001954	NM_001954	DDR1 variant protein (Fragment).	chr6 30959839
NM_001954	NM_001954	DDR1 variant protein (Fragment).	chr6_cox_hap1 2300465
NM_001954	NM_001954	DDR1 variant protein (Fragment).	chr6_qbl_hap2 2098794
NM_001957	NM_001957	Endothelin-1 receptor precursor (Endothelin A receptor) (ET-A) (hET- AR) (ETA-R).	chr4 148621579
NM_001962	NM_001962	Ephrin-A5 precursor (EPH-related receptor tyrosine kinase ligand 7) (LERK-7) (AL-1).	chr5 106744249
NM_001963	NM_001963	Pro-epidermal growth factor precursor (EGF) [Contains: Epidermal growth factor (Urogastrone)].	chr4 111053498
NM_001964	NM_001964	Early growth response protein 1 (EGR-1) (Krox-24 protein) (Transcription factor Zif268) (Nerve growth factor-induced protein A) (NGFI-A) (Transcription factor ETR103) (Zinc finger protein 225) (AT225).	chr5 137829079
NM_001965	NM_001965	Early growth response protein 4 (EGR-4) (AT133).	chr2 73371573
NM_001987	NM_001987	Transcription factor ETV6 (ETS-related protein Tel1) (Tel) (ETS translocation variant 6).	chr12 11694054
NM_001988	NM_001988	Envoplakin (210 kDa paraneoplastic pemphigus antigen) (p210) (210 kDa cornified envelope precursor protein).	chr17 71514521
NM_001989	NM_001989	Homeobox even-skipped homolog protein 1 (EVX-1).	chr7 27248688
NM_001991	NM_001991	Enhancer of zeste homolog 1 (ENX-2).	chr17 38105819
NM_001992	NM_001992	Proteinase-activated receptor 1 precursor (PAR-1) (Thrombin receptor) (Coagulation factor II receptor).	chr5 76047546
NM_002002	NM_002002	Low affinity immunoglobulin epsilon Fc receptor (Lymphocyte IgE receptor) (Fc-epsilon-RII) (CD23 antigen) (BLAST-2) (Immunoglobulin E- binding factor) [Contains: Low affinity immunoglobulin epsilon Fc receptor membrane bound form; Low affinity immunoglobu	chr19 7659662
NM_002013	NM_002013	FK506-binding protein 3 (EC 5.2.1.8) (Peptidyl-prolyl cis-trans isomerase) (PPIase) (Rotamase) (25 kDa FKBP) (FKBP-25) (Rapamycin- selective 25 kDa immunophilin).	chr14 44654858
NM_002015	NM_002015	Forkhead box protein O1A (Forkhead in rhabdomyosarcoma).	chr13 40027818
NM_002016	NM_002016	Filaggrin.	chr1 150541274
NM_002019	NM_002019	Vascular endothelial growth factor receptor 1 precursor (EC 2.7.1.112) (VEGFR-1) (Vascular permeability factor receptor) (Tyrosine-protein kinase receptor FLT) (Flt-1) (Tyrosine-protein kinase FRT) (Fms-like tyrosine kinase 1).	chr13 27773790
NM_002020	NM_002020	Vascular endothelial growth factor receptor 3 precursor (EC 2.7.1.112) (VEGFR-3) (Tyrosine-protein kinase receptor FLT4).	chr5 179967359
NM_002040	NM_002040	GA binding protein alpha chain (GABP-alpha subunit) (Transcription factor E4TF1-60) (Nuclear respiratory factor 2 subunit alpha).	chr21 26029569
NM_002041	NM_002041	n/a	chr15 48365370
NM_002041	NM_181427	n/a	chr15 48365370
NM_002042	NM_002042	Gamma-aminobutyric-acid receptor rho-1 subunit precursor (GABA(A) receptor).	chr6 89944690
NM_002043	NM_002043	Gamma-aminobutyric-acid receptor rho-2 subunit precursor (GABA(A) receptor).	chr6 90023957
NM_002048	NM_002048	Growth-arrest-specific protein 1 precursor (GAS-1).	chr9 88749098
NM_002049	NM_002049	Erythroid transcription factor (GATA-binding factor 1) (GATA-1) (Eryf1) (GF-1) (NF-E1 DNA-binding protein).	chrX 48529905
NM_002060	NM_002060	Gap junction alpha-4 protein (Connexin-37) (Cx37).	chr1 35031185
NM_002062	NM_002062	Glucagon-like peptide 1 receptor precursor (GLP-1 receptor) (GLP-1-R) (GLP-1R).	chr6 39124594
NM_002067	NM_002067	Guanine nucleotide-binding protein alpha-11 subunit (G alpha-11) (Guanine nucleotide-binding protein G(y), alpha subunit).	chr19 3045529
NM_002068	NM_002068	Guanine nucleotide-binding protein alpha-15 subunit (G alpha-15) (G alpha-16).	chr19 3087229
NM_002077	NM_002077	Golgin subfamily A member 1 (Golgin-97).	chr9 126680449
NM_002106	NM_002106	Histone H2A.z (H2A/z).	chr4 101088266
NM_002129	NM_002129	High mobility group protein 2 (HMG-2).	chr4 174489362
NM_002133	NM_002133	Heme oxygenase 1 (EC 1.14.99.3) (HO-1).	chr22 34107086
NM_002134	NM_002134	Heme oxygenase 2 (EC 1.14.99.3) (HO-2).	chr16 4466446
NM_002140	NM_002140	Heterogeneous nuclear ribonucleoprotein K (hnRNP K) (Transformation up-regulated nuclear protein) (TUNP).	chr9 85772911
NM_002140	NM_031262	Heterogeneous nuclear ribonucleoprotein K (hnRNP K) (Transformation up-regulated nuclear protein) (TUNP).	chr9 85772911
NM_002141	NM_002141	Homeobox protein Hox-A4 (Hox-1D) (Hox-1.4).	chr7 27134534
NM_002144	NM_002144	Homeobox protein Hox-B1 (Hox-2I).	chr17 43961805
NM_002146	NM_002146	Homeobox protein Hox-B3 (Hox-2G) (Hox-2.7).	chr17 43981231
NM_002147	NM_002147	Homeobox protein Hox-B5 (Hox-2A) (HHO.C10) (HU-1).	chr17 44023617
NM_002148	NM_002148	Homeobox protein Hox-D10 (Hox-4D) (Hox-4E).	chr2 176689737
NM_002165	NM_002165	DNA-binding protein inhibitor ID-1 (Inhibitor of DNA binding 1).	chr20 29656752
NM_002165	NM_181353	DNA-binding protein inhibitor ID-1 (Inhibitor of DNA binding 1).	chr20 29656752
NM_002166	NM_002166	DNA-binding protein inhibitor ID-2 (Inhibitor of DNA binding 2).	chr2 8739563
NM_002167	NM_002167	DNA-binding protein inhibitor ID-3 (Inhibitor of DNA binding 3) (ID- like protein inhibitor HLH 1R21) (Helix-loop-helix protein HEIR-1).	chr1 23757042
NM_002180	NM_002180	DNA-binding protein SMUBP-2 (EC 3.6.1.-) (ATP-dependent helicase IGHMBP2) (Immunoglobulin mu-binding protein 2) (SMUBP-2) (Glial factor 1) (GF-1).	chr11 68427947
NM_002184	NM_002184	Interleukin-6 receptor beta chain precursor (IL-6R-beta) (Interleukin 6 signal transducer) (Membrane glycoprotein 130) (gp130) (Oncostatin M receptor) (CD130 antigen) (CDw130).	chr5 55272451
NM_002184	NM_175767	IL6ST nirs variant 5.	chr5 55272451
NM_002187	NM_002187	Interleukin-12 beta chain precursor (IL-12B) (IL-12 p40) (Cytotoxic lymphocyte maturation factor 40 kDa subunit) (CLMF p40) (NK cell stimulatory factor chain 2) (NKSF2).	chr5 158674368
NM_002199	NM_002199	Interferon regulatory factor 2 (IRF-2).	chr4 185545909
NM_002203	NM_002203	Integrin alpha-2 precursor (Platelet membrane glycoprotein Ia) (GPIa) (Collagen receptor) (VLA-2 alpha chain) (CD49b).	chr5 52321013
NM_002205	NM_002205	Integrin alpha-5 precursor (Fibronectin receptor alpha subunit) (Integrin alpha-F) (VLA-5) (CD49e) [Contains: Integrin alpha-5 heavy chain; Integrin alpha-5 light chain].	chr12 53075313
NM_002208	NM_002208	Integrin alpha-E precursor (Mucosal lymphocyte-1 antigen) (HML-1 antigen) (CD103 antigen) (Integrin alpha-IEL) [Contains: Integrin alpha-E light chain; Integrin alpha-E heavy chain].	chr17 3564671
NM_002210	NM_002210	Integrin alpha-V precursor (Vitronectin receptor alpha subunit) (CD51 antigen) [Contains: Integrin alpha-V heavy chain; Integrin alpha-V light chain].	chr2 187163044
NM_002211	NM_002211	Integrin beta-1 precursor (Fibronectin receptor beta subunit) (Integrin VLA-4 beta subunit) (CD29 antigen).	chr10 33229326
NM_002224	NM_002224	Inositol 1,4,5-trisphosphate receptor type 3 (Type 3 inositol 1,4,5- trisphosphate receptor) (Type 3 InsP3 receptor) (IP3 receptor isoform 3) (InsP3R3).	chr6 33697321
NM_002226	NM_002226	Jagged-2 precursor (Jagged2) (HJ2).	chr14 104679121
NM_002226	NM_145159	n/a	chr14 104679121
NM_002229	NM_002229	Transcription factor jun-B.	chr19 12763309
NM_002230	NM_002230	Junction plakoglobin (Desmoplakin-3) (Desmoplakin III).	chr17 37164389
NM_002233	NM_002233	Potassium voltage-gated channel subfamily A member 4 (Voltage-gated potassium channel subunit Kv1.4) (HK1) (HPCN2) (HBK4) (HUKII).	chr11 29988341
NM_002234	NM_002234	Potassium voltage-gated channel subfamily A member 5 (Voltage-gated potassium channel subunit Kv1.5) (HK2) (HPCN1).	chr12 5023345
NM_002246	NM_002246	Potassium channel subfamily K member 3 (Acid-sensitive potassium channel protein TASK-1) (TWIK-related acid-sensitive K(+) channel 1) (Two pore potassium channel KT3.1).	chr2 26769122
NM_002250	NM_002250	Intermediate conductance calcium-activated potassium channel protein 4 (SK4) (KCa4) (IK1) (IKCa1) (Putative Gardos channel).	chr19 48962526
NM_002251	NM_002251	Potassium voltage-gated channel subfamily S member 1 (Voltage-gated potassium channel subunit Kv9.1) (Delayed-rectifier K(+) channel alpha subunit 1).	chr20 43154364
NM_002253	NM_002253	Vascular endothelial growth factor receptor 2 precursor (EC 2.7.1.112) (VEGFR-2) (Kinase insert domain receptor) (Protein-tyrosine kinase receptor Flk-1) (CD309 antigen).	chr4 55639406
NM_002254	NM_002254	Kinesin-like protein KIF3C.	chr2 26002971
NM_002265	NM_002265	Importin beta-1 subunit (Karyopherin beta-1 subunit) (Nuclear factor P97) (Importin 90).	chr17 43082273
NM_002266	NM_002266	Importin alpha-2 subunit (Karyopherin alpha-2 subunit) (SRP1-alpha) (RAG cohort protein 1).	chr17 63462309
NM_002266	NM_002266	Importin alpha-2 subunit (Karyopherin alpha-2 subunit) (SRP1-alpha) (RAG cohort protein 1).	chr17_random 1713111
NM_002270	NM_002270	Transportin-1 (Importin beta-)2 (Karyopherin beta-2) (M9 region interaction protein) (MIP).	chr5 72148253
NM_002276	NM_002276	Keratin, type I cytoskeletal 19 (Cytokeratin-19) (CK-19) (Keratin-19) (K19).	chr17 36933395
NM_002277	NM_002277	Keratin, type I cuticular Ha1 (Hair keratin, type I Ha1).	chr17 36803503
NM_002281	BC021241	Type II hair-specific keratin (Type II basic hair keratin) (Fragment).	chr12 50965965
NM_002281	NM_002281	Keratin, type II cuticular Hb1 (Hair keratin, type II Hb1) (ghHKb1) (ghHb1) (MLN 137).	chr12 50965965
NM_002283	NM_002283	Keratin, type II cuticular Hb5 (Hair keratin, type II Hb5).	chr12 51040058
NM_002310	NM_002310	Leukemia inhibitory factor receptor precursor (LIF-R) (CD118 antigen).	chr5 38510822
NM_002337	NM_002337	Alpha-2-macroglobulin receptor-associated protein precursor (Alpha-2- MRAP) (Low density lipoprotein receptor-related protein-associated protein 1) (RAP).	chr4 3484092
NM_002344	BC045607	Leukocyte tyrosine kinase receptor precursor (EC 2.7.1.112) (Protein tyrosine kinase 1).	chr15 39583131
NM_002344	NM_002344	Leukocyte tyrosine kinase receptor precursor (EC 2.7.1.112) (Protein tyrosine kinase 1).	chr15 39583131
NM_002344	NM_206961	n/a	chr15 39583131
NM_002347	NM_002347	Lymphocyte antigen Ly-6H precursor.	chr8 144310706
NM_002349	NM_002349	Lymphocyte antigen 75 precursor (DEC-205) (CD205 antigen) (gp200-MR6).	chr2 160368121
NM_002355	NM_002355	Cation-dependent mannose-6-phosphate receptor precursor (CD Man-6-P receptor) (CD-MPR) (46 kDa mannose 6-phosphate receptor) (MPR 46).	chr12 8984231
NM_002360	NM_002360	Transcription factor MafK (Erythroid transcription factor NF-E2 p18 subunit).	chr7 1536893
NM_002372	NM_002372	Alpha-mannosidase II (EC 3.2.1.114) (Mannosyl-oligosaccharide 1,3-1,6- alpha-mannosidase) (MAN II) (Golgi alpha-mannosidase II) (Mannosidase alpha class 2A member 1).	chr5 109053054
NM_002382	NM_002382	Max protein (Myc associated factor X).	chr14 64611597
NM_002382	NM_145112	MAX protein, isoform b.	chr14 64611597
NM_002382	NM_145113	MAX protein.	chr14 64611597
NM_002388	NM_002388	DNA replication licensing factor MCM3 (DNA polymerase alpha holoenzyme-associated protein P1) (RLF beta subunit) (P102 protein) (P1-MCM3).	chr6 52236770
NM_002390	NM_002390	ADAM 11 precursor (A disintegrin and metalloproteinase domain 11) (Metalloproteinase-like, disintegrin-like, and cysteine-rich protein) (MDC).	chr17 40192093
NM_002398	NM_002398	Homeobox protein Meis1.	chr2 66516035
NM_002399	AK001298	Hypothetical protein FLJ10436.	chr15 34970524
NM_002399	NM_002399	Homeobox protein Meis2, isoform f.	chr15 34970524
NM_002399	NM_170674	Homeobox protein Meis2, isoform f.	chr15 34970524
NM_002399	NM_170675	Homeobox protein Meis2 (Meis1-related protein 1).	chr15 34970524
NM_002399	NM_170676	Hypothetical protein FLJ10436.	chr15 34970524
NM_002399	NM_170677	Homeobox protein Meis2, isoform f.	chr15 34970524
NM_002399	NM_172315	Homeobox protein Meis2, isoform f.	chr15 34970524
NM_002405	NM_002405	Beta-1,3-N-acetylglucosaminyltransferase manic fringe (EC 2.4.1.222) (O-fucosylpeptide 3-beta-N-acetylglucosaminyltransferase).	chr22 36195048
NM_002406	NM_002406	Alpha-1,3-mannosyl-glycoprotein 2-beta-N-acetylglucosaminyltransferase (EC 2.4.1.101) (N-glycosyl-oligosaccharide-glycoprotein N- acetylglucosaminyltransferase I) (GNT-I) (GlcNAc-T I).	chr5 180150152
NM_002431	NM_002431	CDK-activating kinase assembly factor MAT1 (RING finger protein MAT1) (Menage a trois) (CDK7/cyclin H assembly factor) (p36) (p35) (Cyclin G1-interacting protein) (RING finger protein 66).	chr14 60271222
NM_002437	NM_002437	Mpv17 protein.	chr2 27385864
NM_002444	NM_002444	Moesin (Membrane-organizing extension spike protein).	chrX 64804235
NM_002447	NM_002447	Macrophage-stimulating protein receptor precursor (EC 2.7.1.112) (MSP receptor) (p185-Ron) (CDW136) (CD136 antigen) [Contains: Macrophage- stimulating protein receptor alpha chain; Macrophage-stimulating protein receptor beta chain].	chr3 49899441
NM_002449	NM_002449	Homeobox protein MSX-2 (Hox-8).	chr5 174084180
NM_002463	AK126107	Hypothetical protein FLJ44119.	chr21 41655826
NM_002463	NM_002463	Interferon-induced GTP-binding protein Mx2 (Interferon-regulated resistance GTP-binding protein MxB) (p78-related protein).	chr21 41655819
NM_002466	NM_002466	Myb-related protein B (B-Myb).	chr20 41729122
NM_002467	NM_002467	Myc proto-oncogene protein (c-Myc) (Transcription factor p64).	chr8 128817497
NM_002469	NM_002469	Myogenic factor 6 (Myf-6).	chr12 79625576
NM_002471	NM_002471	Myosin heavy chain, cardiac muscle alpha isoform (MyHC-alpha).	chr14 22921038
NM_002478	NM_002478	Myoblast determination protein 1 (Myogenic factor 3) (Myf-3).	chr11 17697685
NM_002487	NM_002487	Necdin.	chr15 21481654
NM_002497	NM_002497	Serine/threonine-protein kinase Nek2 (EC 2.7.1.37) (NimA-related protein kinase 2) (NimA-like protein kinase 1) (HSPK 21).	chr1 209902744
NM_002500	NM_002500	Neurogenic differentiation factor 1 (NeuroD1) (NeuroD).	chr2 182249439
NM_002505	NM_002505	Nuclear transcription factor Y subunit alpha (Nuclear transcription factor Y subunit A) (NF-YA) (CAAT-box DNA-binding protein subunit A).	chr6 41148687
NM_002505	NM_021705	n/a	chr6 41148687
NM_002507	NM_002507	Tumor necrosis factor receptor superfamily member 16 precursor (Low- affinity nerve growth factor receptor) (NGF receptor) (Gp80-LNGFR) (p75 ICD) (Low affinity neurotrophin receptor p75NTR) (CD271 antigen).	chr17 44927665
NM_002509	NM_002509	Homeobox protein Nkx-2.2 (Homeobox protein NK-2 homolog B).	chr20 21439663
NM_002515	NM_002515	RNA-binding protein Nova-1 (Neuro-oncological ventral antigen 1) (Onconeural ventral antigen 1) (Paraneoplastic Ri antigen) (Ventral neuron-specific protein 1).	chr14 25984929
NM_002515	NM_006489	n/a	chr14 25984929
NM_002517	NM_002517	Neuronal PAS domain protein 1 (Neuronal PAS1) (Member of PAS protein 5) (MOP5).	chr19 52215982
NM_002538	NM_002538	Occludin.	chr5 68823874
NM_002538	NM_002538	Occludin.	chr5_h2_hap1 282584
NM_002552	NM_002552	Origin recognition complex subunit 4.	chr2 148408202
NM_002553	NM_002553	Origin recognition complex subunit 5.	chr7 103554023
NM_002569	NM_002569	Furin precursor (EC 3.4.21.75) (Paired basic amino acid residue cleaving enzyme) (PACE) (Dibasic processing enzyme).	chr15 89212888
NM_002584	NM_002584	Paired box protein Pax-7 (HUP1).	chr1 18830086
NM_002584	NM_013945	Paired box protein Pax-7 (HUP1).	chr1 18830086
NM_002592	NM_002592	Proliferating cell nuclear antigen (PCNA) (Cyclin).	chr20 5043599
NM_002628	NM_002628	Profilin 2, isoform b.	chr3 151165380
NM_002628	NM_053024	Profilin-2 (Profilin II).	chr3 151165380
NM_002641	NM_002641	Phosphatidylinositol N-acetylglucosaminyltransferase subunit A (EC 2.4.1.198) (GlcNAc-PI synthesis protein) (Phosphatidylinositol- glycan biosynthesis, class A protein) (PIG-A).	chrX 15247500
NM_002643	NM_002643	Phosphatidylinositol-glycan biosynthesis, class F protein (PIG-F) (GPI11 homolog).	chr2 46661919
NM_002643	NM_173074	Phosphatidylinositol-glycan biosynthesis, class F protein (PIG-F) (GPI11 homolog).	chr2 46661919
NM_002648	NM_002648	Pim-1 oncogene (Proviral integration site 1).	chr6 37245963
NM_002691	NM_002691	DNA polymerase delta catalytic subunit (EC 2.7.7.7) (DNA polymerase delta subunit p125).	chr19 55579407
NM_002701	NM_002701	POU domain, class 5, transcription factor 1 (Octamer-binding transcription factor 3) (Oct-3) (Oct-4).	chr6 31240107
NM_002701	NM_002701	POU domain, class 5, transcription factor 1 (Octamer-binding transcription factor 3) (Oct-3) (Oct-4).	chr6_qbl_hap2 2381927
NM_002701	NM_203289	POU domain, class 5, transcription factor 1.	chr6 31240107
NM_002701	NM_203289	POU domain, class 5, transcription factor 1.	chr6_qbl_hap2 2381927
NM_002705	NM_002705	Periplakin (195 kDa cornified envelope precursor protein) (190 kDa paraneoplastic pemphigus antigen).	chr16 4872508
NM_002720	NM_002720	Serine/threonine protein phosphatase 4 catalytic subunit (EC 3.1.3.16) (PP4C) (Pp4) (Protein phosphatase X) (PP-X).	chr16 29994884
NM_002729	NM_002729	Homeobox protein PRH (Hematopoietically expressed homeobox) (Homeobox protein HEX).	chr10 94439679
NM_002740	BC022016	Protein kinase C, iota type (EC 2.7.1.37) (nPKC-iota) (Atypical protein kinase C-lambda/iota) (aPKC-lambda/iota) (PRKC-lambda/iota).	chr3 171422920
NM_002740	NM_002740	Protein kinase C, iota type (EC 2.7.1.37) (nPKC-iota) (Atypical protein kinase C-lambda/iota) (aPKC-lambda/iota) (PRKC-lambda/iota).	chr3 171422918
NM_002763	NM_002763	Homeobox prospero-like protein PROX1 (PROX 1).	chr1 212228482
NM_002773	NM_002773	Prostasin precursor (EC 3.4.21.-) [Contains: Prostasin light chain; Prostasin heavy chain].	chr16 31050256
NM_002786	NM_002786	Proteasome subunit alpha type 1 (EC 3.4.25.1) (Proteasome component C2) (Macropain subunit C2) (Multicatalytic endopeptidase complex subunit C2) (Proteasome nu chain) (30 kDa prosomal protein) (PROS-30).	chr11 14482998
NM_002786	NM_148976	Proteasome subunit alpha type 1 (EC 3.4.25.1) (Proteasome component C2) (Macropain subunit C2) (Multicatalytic endopeptidase complex subunit C2) (Proteasome nu chain) (30 kDa prosomal protein) (PROS-30).	chr11 14482998
NM_002788	NM_002788	Proteasome subunit alpha type 3 (EC 3.4.25.1) (Proteasome component C8) (Macropain subunit C8) (Multicatalytic endopeptidase complex subunit C8).	chr14 57781345
NM_002788	NM_152132	n/a	chr14 57781345
NM_002790	NM_002790	Proteasome subunit alpha type 5 (EC 3.4.25.1) (Proteasome zeta chain) (Macropain zeta chain) (Multicatalytic endopeptidase complex zeta chain).	chr1 109746000
NM_002791	NM_002791	Proteasome subunit alpha type 6 (EC 3.4.25.1) (Proteasome iota chain) (Macropain iota chain) (Multicatalytic endopeptidase complex iota chain) (27 kDa prosomal protein) (PROS-27) (p27K).	chr14 34831324
NM_002794	NM_002794	Proteasome subunit beta type 2 (EC 3.4.25.1) (Proteasome component C7- I) (Macropain subunit C7-I) (Multicatalytic endopeptidase complex subunit C7-I).	chr1 35841326
NM_002795	NM_002795	Proteasome subunit beta type 3 (EC 3.4.25.1) (Proteasome theta chain) (Proteasome chain 13) (Proteasome component C10-II).	chr17 34162527
NM_002796	NM_002796	Proteasome subunit beta type 4 precursor (EC 3.4.25.1) (Proteasome beta chain) (Macropain beta chain) (Multicatalytic endopeptidase complex beta chain) (Proteasome chain 3) (HSN3) (HsBPROS26).	chr1 149638664
NM_002798	NM_002798	Proteasome subunit beta type 6 precursor (EC 3.4.25.1) (Proteasome delta chain) (Macropain delta chain) (Multicatalytic endopeptidase complex delta chain) (Proteasome subunit Y).	chr17 4646414
NM_002799	NM_002799	Proteasome subunit beta type 7 precursor (EC 3.4.25.1) (Proteasome subunit Z) (Macropain chain Z) (Multicatalytic endopeptidase complex chain Z).	chr9 126155565
NM_002803	NM_002803	26S protease regulatory subunit 7 (MSS1 protein).	chr7 102775324
NM_002804	BC106920	PSMC3 protein.	chr11 47396907
NM_002804	NM_002804	26S protease regulatory subunit 6A (TAT-binding protein 1) (TBP-1) (Proteasome subunit P50).	chr11 47396895
NM_002812	NM_002812	26S proteasome non-ATPase regulatory subunit 8 (26S proteasome regulatory subunit S14) (p31).	chr19 43557060
NM_002819	NM_002819	Polypyrimidine tract-binding protein 1 (PTB) (Heterogeneous nuclear ribonucleoprotein I) (hnRNP I) (57 kDa RNA-binding protein PPTB-1).	chr19 748410
NM_002819	NM_031990	Polypyrimidine tract-binding protein 1 (PTB) (Heterogeneous nuclear ribonucleoprotein I) (hnRNP I) (57 kDa RNA-binding protein PPTB-1).	chr19 748410
NM_002819	NM_031991	Polypyrimidine tract-binding protein 1 (PTB) (Heterogeneous nuclear ribonucleoprotein I) (hnRNP I) (57 kDa RNA-binding protein PPTB-1).	chr19 748410
NM_002847	NM_002847	Receptor-type tyrosine-protein phosphatase N2 precursor (EC 3.1.3.48) (R-PTP-N2) (Islet cell autoantigen related protein) (ICAAR) (IAR) (Phogrin).	chr7 157024515
NM_002847	NM_130842	Hypothetical protein DKFZp761A0712 (Fragment).	chr7 157024515
NM_002847	NM_130843	Hypothetical protein DKFZp761A0712 (Fragment).	chr7 157024515
NM_002865	NM_002865	Ras-related protein Rab-2A.	chr8 61592112
NM_002868	NM_002868	Ras-related protein Rab-5B.	chr12 54654128
NM_002869	NM_002869	RAB6A, member RAS oncogene family isoform a variant (Fragment).	chr11 73064337
NM_002869	NM_198896	Ras-related protein Rab-6A (Rab-6).	chr11 73064337
NM_002875	AK131299	Hypothetical protein FLJ16262.	chr15 38774669
NM_002875	NM_002875	DNA repair protein RAD51 homolog 1 (hRAD51) (HsRAD51).	chr15 38774660
NM_002875	NM_133487	RAD51 (Fragment).	chr15 38774660
NM_002893	AK091911	Retinoblastoma binding protein 7.	chrX 16772697
NM_002893	CR592155	Retinoblastoma binding protein 7.	chrX 16772732
NM_002893	NM_002893	Histone acetyltransferase type B subunit 2 (Retinoblastoma binding protein P46) (Retinoblastoma-binding protein 7) (RBBP-7).	chrX 16772697
NM_002895	NM_002895	Retinoblastoma-like protein 1 (107 kDa retinoblastoma-associated protein) (PRB1) (P107).	chr20 35059592
NM_002907	NM_002907	ATP-dependent DNA helicase Q1 (DNA-dependent ATPase Q1).	chr12 21513964
NM_002908	NM_002908	C-Rel proto-oncogene protein (C-Rel protein).	chr2 60962255
NM_002915	NM_002915	Activator 1 38 kDa subunit (Replication factor C 38 kDa subunit) (A1 38 kDa subunit) (RF-C 38 kDa subunit) (RFC38) (Replication factor C subunit 3).	chr13 33290233
NM_002918	NM_002918	MHC class II regulatory factor RFX1 (RFX) (Enhancer factor C) (EF-C).	chr19 13933352
NM_002922	NM_002922	Regulator of G-protein signaling 1 (RGS1) (Early response protein 1R20) (B-cell activation protein BL34).	chr1 190811479
NM_002938	NM_002938	RING finger protein 4.	chr4 2440604
NM_002941	NM_002941	Roundabout homolog 1 precursor (H-Robo-1) (Deleted in U twenty twenty).	chr3 78729079
NM_002941	NM_133631	n/a	chr3 78729079
NM_002943	NM_002943	n/a	chr15 58576755
NM_002943	NM_134260	Nuclear receptor ROR-alpha (Nuclear receptor RZR-alpha).	chr15 58576755
NM_002943	NM_134261	n/a	chr15 58576755
NM_002943	NM_134262	RAR-related orphan receptor A, isoform d.	chr15 58576755
NM_002943	U04898	n/a	chr15 58576755
NM_002946	CR612693	Replication protein A2, 32kDa.	chr1 28090661
NM_002946	NM_002946	Replication protein A 32 kDa subunit (RP-A) (RF-A) (Replication factor-A protein 2) (P34).	chr1 28090636
NM_002950	NM_002950	Dolichyl-diphosphooligosaccharide--protein glycosyltransferase 67 kDa subunit precursor (EC 2.4.1.119) (Ribophorin I) (RPN-I).	chr3 129821502
NM_002996	NM_002996	Fractalkine precursor (CX3CL1) (Neurotactin) (CX3C membrane-anchored chemokine) (Small inducible cytokine D1).	chr16 55963914
NM_002999	NM_002999	Syndecan-4 precursor (Amphiglycan) (SYND4) (Ryudocan core protein).	chr20 43387344
NM_003019	NM_003019	Pulmonary surfactant-associated protein D precursor (SP-D) (PSP-D).	chr10 81687477
NM_003036	NM_003036	Ski oncogene (C-ski).	chr1 2149993
NM_003044	NM_003044	Sodium- and chloride-dependent betaine transporter (Na+/Cl- betaine/GABA transporter) (BGT-1).	chr12 169512
NM_003068	NM_003068	Zinc finger protein SLUG (Neural crest transcription factor Slug) (Snail homolog 2).	chr8 49992795
NM_003105	NM_003105	Sortilin-related receptor precursor (Sorting protein-related receptor containing LDLR class A repeats) (SorLA) (SorLA-1) (Low-density lipoprotein receptor relative with 11 ligand-binding repeats) (LDLR relative with 11 ligand-binding repeats) (LR11).	chr11 120828129
NM_003108	NM_003108	Transcription factor SOX-11.	chr2 5750249
NM_003112	NM_003112	Transcription factor Sp4 (SPR-1).	chr7 21434213
NM_003116	NM_003116	Sperm-associated antigen 4 protein (Outer dense fiber-associated protein SPAG4).	chr20 33667222
NM_003140	NM_003140	Sex-determining region Y protein (Testis-determining factor).	chrY 2714896
NM_003142	NM_003142	Lupus La protein (Sjogren syndrome type B antigen) (SS-B) (La ribonucleoprotein) (La autoantigen).	chr2 170363634
NM_003146	NM_003146	Structure-specific recognition protein 1 (SSRP1) (Recombination signal sequence recognition protein) (T160) (Chromatin-specific transcription elongation factor 80 kDa subunit) (FACT 80 kDa subunit).	chr11 56850035
NM_003152	NM_003152	Signal transducer and activator of transcription 5A.	chr17 37693090
NM_003153	NM_003153	Signal transducer and activator of transcription 6 (IL-4 Stat).	chr12 55775461
NM_003156	NM_003156	Stromal interaction molecule 1 precursor.	chr11 3833508
NM_003157	NM_003157	Serine/threonine-protein kinase Nek4 (EC 2.7.1.37) (NimA-related protein kinase 4) (Serine/threonine-protein kinase 2) (Serine/threonine-protein kinase NRK2).	chr3 52719841
NM_003168	NM_003168	Transcription elongation factor SPT4 (hSPT4) (DRB sensitivity-inducing factor small subunit) (DSIF small subunit) (DSIF p14).	chr17 53777537
NM_003173	NM_003173	Histone-lysine N-methyltransferase, H3 lysine-9 specific 1 (EC 2.1.1.43) (Histone H3-K9 methyltransferase 1) (H3-K9-HMTase 1) (Suppressor of variegation 3-9 homolog 1) (Su(var)3-9 homolog 1).	chrX 48440074
NM_003179	NM_003179	Synaptophysin (Major synaptic vesicle protein p38).	chrX 48931208
NM_003195	NM_003195	Transcription elongation factor A protein 2 (Transcription elongation factor S-II protein 2) (Testis-specific S-II) (Transcription elongation factor TFIIS.l).	chr20 62164453
NM_003199	NM_003199	Transcription factor 4 (Immunoglobulin transcription factor 2) (ITF-2) (SL3-3 enhancer factor 2) (SEF-2).	chr18 51045966
NM_003202	BC048769	n/a	chr5 133478300
NM_003202	NM_003202	Transcription factor 7 (T-cell-specific transcription factor 1) (TCF- 1) (T-cell factor 1).	chr5 133478300
NM_003205	NM_003205	Transcription factor 12 (Transcription factor HTF-4) (E-box-binding protein) (DNA-binding protein HTF4).	chr15 54998124
NM_003205	NM_207037	Transcription factor 12 (Transcription factor HTF-4) (E-box-binding protein) (DNA-binding protein HTF4).	chr15 54998124
NM_003212	NM_003212	Teratocarcinoma-derived growth factor 1 precursor (Epidermal growth factor-like cripto protein CR1) (Cripto-1 growth factor) (CRGF).	chr3 46594216
NM_003214	NM_003214	TEAD3 protein (Fragment).	chr6 35549353
NM_003218	NM_003218	Telomeric repeat binding factor 1, isoform 2.	chr8 74083662
NM_003218	NM_017489	Telomeric repeat binding factor 1 (TTAGGG repeat binding factor 1) (NIMA-interacting protein 2) (Telomeric protein Pin2/TRF1).	chr8 74083662
NM_003219	NM_003219	Telomerase reverse transcriptase (EC 2.7.7.49) (Telomerase catalytic subunit) (HEST2) (Telomerase-associated protein 2) (TP2).	chr5 1306286
NM_003219	NM_198253	Beta and gamma deletion isoform of telomerase reverse transcriptase.	chr5 1306286
NM_003219	NM_198254	ABG-deleted variant of telomerase reverse transcriptase.	chr5 1306286
NM_003219	NM_198255	ABG-deleted variant of telomerase reverse transcriptase.	chr5 1306286
NM_003221	NM_003221	Transcription factor AP-2 beta (AP2-beta) (Activating enhancer-binding protein 2 beta).	chr6 50894541
NM_003222	NM_003222	Transcription factor AP-2 gamma (AP2-gamma) (Activating enhancer- binding protein 2 gamma) (Transcription factor ERF-1).	chr20 54637764
NM_003224	NM_003224	ARF-related protein 1 (ARP).	chr20 61801252
NM_003251	NM_003251	Thyroid hormone-inducible hepatic protein (Spot 14 protein) (SPOT14) (S14 protein).	chr11 77452554
NM_003260	NM_003260	Transducin-like enhancer protein 2 (ESG2).	chr19 2948636
NM_003263	NM_003263	Toll-like receptor 1 precursor (Toll/interleukin-1 receptor-like protein) (TIL) (CD281 antigen).	chr4 38474271
NM_003264	NM_003264	Toll-like receptor 2 precursor (Toll/interleukin 1 receptor-like protein 4) (CD282 antigen).	chr4 154824890
NM_003265	NM_003265	Toll-like receptor 3 precursor (CD283 antigen).	chr4 187227302
NM_003275	NM_003275	Tropomodulin-1 (Erythrocyte tropomodulin) (E-Tmod).	chr9 99326257
NM_003277	NM_003277	Claudin-5 (Transmembrane protein deleted in VCFS) (TMDVCF).	chr22 17890549
NM_003284	NM_003284	Spermatid nuclear transition protein 1 (STP-1) (TP-1).	chr2 217432428
NM_003289	NM_003289	Tropomyosin beta chain (Tropomyosin 2) (Beta-tropomyosin).	chr9 35672923
NM_003327	NM_003327	Tumor necrosis factor receptor superfamily member 4 precursor (OX40L receptor) (ACT35 antigen) (TAX transcriptionally-activated glycoprotein 1 receptor) (CD134 antigen).	chr1 1136569
NM_003332	NM_003332	TYRO protein tyrosine kinase-binding protein precursor (DNAX- activation protein 12) (Killer-activating receptor-associated protein).	chr19 41087145
NM_003332	NM_198125	n/a	chr19 41087145
NM_003336	NM_003336	Ubiquitin-conjugating enzyme E2 A (EC 6.3.2.19) (Ubiquitin-protein ligase A) (Ubiquitin carrier protein A) (HR6A) (hHR6A).	chrX 118592526
NM_003358	NM_003358	Ceramide glucosyltransferase (EC 2.4.1.80) (Glucosylceramide synthase) (GCS) (UDP-glucose:N-acylsphingosine D-glucosyltransferase) (UDP- glucose ceramide glucosyltransferase) (GLCT-1).	chr9 113699026
NM_003360	NM_003360	2-hydroxyacylsphingosine 1-beta-galactosyltransferase precursor (EC 2.4.1.45) (UDP-galactose-ceramide galactosyltransferase) (Ceramide UDP-galactosyltransferase) (Cerebroside synthase).	chr4 115762971
NM_003363	NM_003363	Ubiquitin carboxyl-terminal hydrolase 4 (EC 3.1.2.15) (Ubiquitin thiolesterase 4) (Ubiquitin-specific processing protease 4) (Deubiquitinating enzyme 4) (Ubiquitous nuclear protein homolog).	chr3 49289997
NM_003363	NM_199443	Ubiquitin specific protease, proto-oncogene isoform b variant (Fragment).	chr3 49289997
NM_003367	NM_003367	Upstream stimulatory factor 2 (Upstream transcription factor 2) (FOS- interacting protein) (FIP) (Major late transcription factor 2).	chr19 40451735
NM_003367	NM_207291	Upstream stimulatory factor 2c.	chr19 40451735
NM_003377	NM_003377	Vascular endothelial growth factor B precursor (VEGF-B) (VEGF related factor) (VRF).	chr11 63758841
NM_003382	NM_003382	Vasoactive intestinal polypeptide receptor 2 precursor (VIP-R-2) (Pituitary adenylate cyclase-activating polypeptide type III receptor) (PACAP type III receptor) (PACAP-R-3) (Helodermin-preferring VIP receptor).	chr7 158513627
NM_003390	NM_003390	Wee1-like protein kinase (EC 2.7.1.112) (WEE1hu).	chr11 9550915
NM_003403	NM_003403	Transcriptional repressor protein YY1 (Yin and yang 1) (YY-1) (Delta transcription factor) (NF-E1).	chr14 99774854
NM_003407	NM_003407	Tristetraproline (TTP) (Zinc finger protein 36 homolog) (Zfp-36) (TIS11A protein) (TIS11) (Growth factor-inducible nuclear protein NUP475) (G0/G1 switch regulatory protein 24).	chr19 44589326
NM_003409	NM_003409	Zinc finger protein 161 homolog (Zfp-161) (Zinc finger protein 5) (hZF5) (Zinc finger and BTB domain-containing protein 14).	chr18 5279378
NM_003410	M30608	n/a	chrX 24079728
NM_003410	NM_003410	Zinc finger X-chromosomal protein.	chrX 24079728
NM_003411	NM_003411	Zinc finger Y-chromosomal protein.	chrY 2863545
NM_003412	NM_003412	Zinc finger protein ZIC 1 (Zinc finger protein of the cerebellum 1).	chr3 148609870
NM_003443	NM_003443	Zinc finger and BTB domain-containing protein 17 (Zinc finger protein 151) (Myc-interacting zinc finger protein) (Miz-1 protein).	chr1 16140952
NM_003460	BC096305	ZP2 protein.	chr16 21116273
NM_003460	NM_003460	Zona pellucida sperm-binding protein 2 precursor (Zona pellucida glycoprotein ZP2) (Zona pellucida protein A).	chr16 21116273
NM_003476	NM_003476	Cysteine and glycine-rich protein 3 (Cysteine-rich protein 3) (CRP3) (LIM domain protein, cardiac) (Muscle LIM protein).	chr11 19160153
NM_003500	NM_003500	Acyl-coenzyme A oxidase 2, peroxisomal (EC 1.3.3.6) (Branched-chain acyl-CoA oxidase) (BRCACox) (Trihydroxycoprostanoyl-CoA oxidase) (THCCox) (THCA-CoA oxidase).	chr3 58465903
NM_003503	NM_003503	Cell division cycle 7-related protein kinase (EC 2.7.1.-) (CDC7- related kinase) (HsCdc7) (huCdc7).	chr1 91739031
NM_003507	NM_003507	Frizzled 7 precursor (Frizzled-7) (Fz-7) (hFz7) (FzE3).	chr2 202607554
NM_003529	NM_003529	Histone H3.1 (H3/a) (H3/c) (H3/d) (H3/f) (H3/h) (H3/i) (H3/j) (H3/k) (H3/l).	chr6 26128696
NM_003578	BC099626	SOAT2 protein.	chr12 51783581
NM_003578	NM_003578	Sterol O-acyltransferase 2 (EC 2.3.1.26) (Cholesterol acyltransferase 2) (Acyl coenzyme A:cholesterol acyltransferase 2) (ACAT-2).	chr12 51783581
NM_003593	NM_003593	Forkhead box protein N1 (Transcription factor winged-helix nude).	chr17 23875085
NM_003596	NM_003596	Protein-tyrosine sulfotransferase 1 (EC 2.8.2.20) (Tyrosylprotein sulfotransferase-1) (TPST-1).	chr7 65307748
NM_003612	NM_003612	Semaphorin-7A precursor (Semaphorin L) (Sema L) (Semaphorin K1) (Sema K1) (John-Milton-Hargen human blood group Ag) (JMH blood group antigen) (CD108 antigen) (CDw108).	chr15 72489375
NM_003633	NM_003633	Ectoderm-neural cortex 1 protein (ENC-1) (p53-induced protein 10) (Nuclear matrix protein NRP/B).	chr5 73958990
NM_003635	NM_003635	Heparin sulfate N-deacetylase/N-sulfotransferase (EC 2.8.2.-) (N-HSST) (N-heparin sulfate sulfotransferase) (Glucosaminyl N-deacetylase/N- sulfotransferase).	chr10 75231674
NM_003643	NM_003643	Chorion-specific transcription factor GCMa (Glial cells missing homolog 1) (GCM motif protein 1) (hGCMa).	chr6 53099720
NM_003670	NM_003670	Class B basic helix-loop-helix protein 2 (bHLHB2) (Differentially expressed in chondrocytes protein 1) (DEC1) (Enhancer-of-split and hairy-related protein 2) (SHARP-2) (Stimulated with retinoic acid 13).	chr3 4996207
NM_003675	NM_003675	Pre-mRNA splicing factor 18 (PRP18 homolog) (hPRP18).	chr10 13669020
NM_003707	NM_003707	RuvB-like 1 (EC 3.6.1.-) (49-kDa TATA box-binding protein-interacting protein) (49 kDa TBP-interacting protein) (TIP49a) (Pontin 52) (Nuclear matrix protein 238) (NMP 238) (54 kDa erythrocyte cytosolic protein) (ECP-54) (TIP60-associated protein 54-alpha)	chr3 129282492
NM_003711	NM_003711	Lipid phosphate phosphohydrolase 1 (EC 3.1.3.4) (Phosphatidic acid phosphatase 2a) (Phosphatidate phosphohydrolase type 2a) (PAP2a) (PAP- 2a) (PAP2-alpha).	chr5 54756441
NM_003711	NM_176895	n/a	chr5 54756441
NM_003721	NM_003721	DNA-binding protein RFXANK (Regulatory factor X subunit B) (RFX-B) (Ankyrin repeat family A protein 1).	chr19 19164007
NM_003721	NM_134440	n/a	chr19 19164007
NM_003734	NM_003734	Membrane copper amine oxidase (EC 1.4.3.6) (Semicarbazide-sensitive amine oxidase) (SSAO) (Vascular adhesion protein 1) (VAP-1) (HPAO).	chr17 38256726
NM_003742	NM_003742	Bile salt export pump (ATP-binding cassette sub-family B member 11).	chr2 169487694
NM_003770	NM_003770	Keratin, type I cuticular Ha7 (Hair keratin, type I Ha7).	chr17 36830334
NM_003775	NM_003775	Sphingosine 1-phosphate receptor Edg-6 (S1P receptor Edg-6) (Endothelial differentiation G-protein coupled receptor 6) (Sphingosine 1-phosphate receptor 4) (S1P4).	chr19 3129765
NM_003791	NM_003791	Membrane-bound transcription factor site-1 protease precursor (EC 3.4.21.-) (Site-1 protease) (Subtilisin/kexin-isozyme-1) (SKI-1).	chr16 82644871
NM_003791	NM_201268	MBTPS1 protein.	chr16 82644871
NM_003810	NM_003810	Tumor necrosis factor ligand superfamily member 10 (TNF-related apoptosis-inducing ligand) (TRAIL protein) (Apo-2 ligand) (Apo-2L) (CD253 antigen).	chr3 173706158
NM_003817	NM_003817	ADAM 7 precursor (A disintegrin and metalloproteinase domain 7) (Sperm maturation-related glycoprotein GP-83).	chr8 24354483
NM_003827	AK126519	Hypothetical protein FLJ44555.	chr19 52682706
NM_003827	NM_003827	Alpha-soluble NSF attachment protein (SNAP-alpha) (N-ethylmaleimide- sensitive factor attachment protein, alpha).	chr19 52682702
NM_003855	NM_003855	Interleukin-18 receptor 1 precursor (IL1 receptor-related protein) (IL-1Rrp) (CDw218a antigen).	chr2 102345528
NM_003860	NM_003860	Barrier-to-autointegration factor (Breakpoint cluster region protein 1).	chr11 65526125
NM_003865	NM_003865	Homeobox expressed in ES cells 1 (Homeobox protein ANF) (hAnf).	chr3 57207264
NM_003878	NM_003878	Gamma-glutamyl hydrolase precursor (EC 3.4.19.9) (Gamma-Glu-X carboxypeptidase) (Conjugase) (GH).	chr8 64090196
NM_003885	NM_003885	Cyclin-dependent kinase 5 activator 1 precursor (CDK5 activator 1) (Cyclin-dependent kinase 5 regulatory subunit 1) (Tau protein kinase II 23 kDa subunit) (TPKII regulatory subunit) (p23) (p25) (p35) [Contains: Cyclin-dependent kinase 5 activator 1, p35;	chr17 27838217
NM_003901	NM_003901	Sphingosine-1-phosphate lyase 1 (EC 4.1.2.27) (SP-lyase) (hSPL) (Sphingosine-1-phosphate aldolase).	chr10 72245721
NM_003904	NM_003904	Zinc-finger protein ZPR1 (Zinc finger protein 259).	chr11 116154486
NM_003906	NM_003906	80 kda MCM3-associated protein (GANP protein).	chr21 46479475
NM_003916	NM_003916	Adapter-related protein complex 1 sigma 1B subunit (Sigma-adaptin 1B) (Adaptor protein complex AP-1 sigma-1B subunit) (Golgi adaptor HA1/AP1 adaptin sigma-1B subunit) (Clathrin assembly protein complex 1 sigma- 1B small chain) (Sigma 1B subunit of AP-1 cl	chrX 15753850
NM_003923	NM_003923	Forkhead box protein H1 (Forkhead activin signal transducer 1) (Fast- 1) (hFAST-1) (Forkhead activin signal transducer 2) (Fast-2).	chr8 145670316
NM_003924	NM_003924	Paired mesoderm homeobox protein 2B (Paired-like homeobox 2B) (PHOX2B homeodomain protein) (Neuroblastoma Phox) (NBPhox).	chr4 41440856
NM_004004	NM_004004	Gap junction beta-2 protein (Connexin-26) (Cx26).	chr13 19659608
NM_004063	NM_004063	Cadherin-17 precursor (Liver-intestine-cadherin) (LI-cadherin) (Intestinal peptide-associated transporter HPT-1).	chr8 95208567
NM_004064	NM_004064	Cyclin-dependent kinase inhibitor 1B (Cyclin-dependent kinase inhibitor p27) (p27Kip1).	chr12 12761575
NM_004066	NM_004066	Centrin-1 (Caltractin isoform 2).	chr18 570368
NM_004083	NM_004083	DNA-damage inducible transcript 3 (DDIT-3) (Growth arrest and DNA- damage-inducible protein GADD153) (C/EBP-homologous protein) (CHOP).	chr12 56196639
NM_004093	NM_004093	Ephrin-B2 precursor (EPH-related receptor tyrosine kinase ligand 5) (LERK-5) (HTK ligand) (HTK-L).	chr13 105940098
NM_004098	NM_004098	Homeobox protein EMX2 (Empty spiracles homolog 2) (Empty spiracles- like protein 2).	chr10 119291945
NM_004101	NM_004101	Proteinase-activated receptor 3 precursor (PAR-3) (Thrombin receptor- like 2) (Coagulation factor II receptor-like 2).	chr5 75947063
NM_004106	BC033872	High affinity immunoglobulin epsilon receptor gamma-subunit precursor (FceRI gamma) (IgE Fc receptor gamma-subunit) (Fc-epsilon RI-gamma).	chr1 159451716
NM_004106	NM_004106	High affinity immunoglobulin epsilon receptor gamma-subunit precursor (FceRI gamma) (IgE Fc receptor gamma-subunit) (Fc-epsilon RI-gamma).	chr1 159451710
NM_004111	NM_004111	Flap endonuclease-1 (EC 3.-.-.-) (Maturation factor 1) (MF1).	chr11 61316725
NM_004113	NM_004113	Fibroblast growth factor 12 (Fragment).	chr3 193342423
NM_004113	NM_021032	Fibroblast growth factor 12 (FGF-12) (Fibroblast growth factor homologous factor 1) (FHF-1) (Myocyte-activating factor).	chr3 193342423
NM_004126	NM_004126	Guanine nucleotide-binding protein G(I)/G(S)/G(O) gamma-11 subunit.	chr7 93389034
NM_004138	NM_004138	Keratin, type I cuticular Ha3-I (Hair keratin, type I Ha3-I).	chr17 36755896
NM_004143	NM_004143	Cbp/p300-interacting transactivator 1 (Melanocyte-specific protein 1).	chrX 71438226
NM_004145	NM_004145	Myosin-9B (Myosin IXb) (Unconventional myosin-9b).	chr19 17073527
NM_004159	NM_004159	Proteasome (Prosome, macropain) subunit, beta type, 8 (Large multifunctional protease 7).	chr6 32916476
NM_004159	NM_004159	Proteasome (Prosome, macropain) subunit, beta type, 8 (Large multifunctional protease 7).	chr6_cox_hap1 4189350
NM_004159	NM_004159	Proteasome (Prosome, macropain) subunit, beta type, 8 (Large multifunctional protease 7).	chr6_qbl_hap2 3994551
NM_004159	NM_148919	Proteasome subunit beta type 8 precursor (EC 3.4.25.1) (Proteasome component C13) (Macropain subunit C13) (Multicatalytic endopeptidase complex subunit C13).	chr6 32916476
NM_004159	NM_148919	Proteasome subunit beta type 8 precursor (EC 3.4.25.1) (Proteasome component C13) (Macropain subunit C13) (Multicatalytic endopeptidase complex subunit C13).	chr6_cox_hap1 4189350
NM_004159	NM_148919	Proteasome subunit beta type 8 precursor (EC 3.4.25.1) (Proteasome component C13) (Macropain subunit C13) (Multicatalytic endopeptidase complex subunit C13).	chr6_qbl_hap2 3994551
NM_004162	NM_004162	Ras-related protein Rab-5A.	chr3 19963762
NM_004186	NM_004186	Semaphorin-3F precursor (Semaphorin IV) (Sema IV) (Sema III/F).	chr3 50167851
NM_004189	NM_004189	Transcription factor SOX-14.	chr3 138966268
NM_004197	NM_004197	Serine/threonine kinase 19 (Serine/threonine kinase 19) (Fragment).	chr6 32047624
NM_004197	NM_004197	Serine/threonine kinase 19 (Serine/threonine kinase 19) (Fragment).	chr6_cox_hap1 3385908
NM_004197	NM_004197	Serine/threonine kinase 19 (Serine/threonine kinase 19) (Fragment).	chr6_qbl_hap2 3187381
NM_004197	NM_032454	Serine/threonine-protein kinase 19 (EC 2.7.1.37) (RP1 protein) (G11 protein).	chr6 32047624
NM_004197	NM_032454	Serine/threonine-protein kinase 19 (EC 2.7.1.37) (RP1 protein) (G11 protein).	chr6_cox_hap1 3385908
NM_004197	NM_032454	Serine/threonine-protein kinase 19 (EC 2.7.1.37) (RP1 protein) (G11 protein).	chr6_qbl_hap2 3187381
NM_004200	NM_004200	Synaptotagmin-7 (Synaptotagmin VII) (SytVII).	chr11 61039363
NM_004226	NM_004226	Serine/threonine-protein kinase 17B (EC 2.7.1.37) (DAP kinase-related apoptosis-inducing protein kinase 2).	chr2 196710102
NM_004234	NM_004234	Zinc finger protein 235 (Zinc finger protein 93 homolog) (Zfp-93) (Zinc finger protein HZF6) (Fragment).	chr19 49482439
NM_004251	NM_004251	Ras-related protein Rab-9A (Rab-9).	chrX 13617261
NM_004252	NM_004252	Ezrin-radixin-moesin binding phosphoprotein 50 (EBP50) (Na(+)/H(+) exchange regulatory cofactor NHE-RF) (NHERF-1) (Regulatory cofactor of Na(+)/H(+) exchanger) (Sodium-hydrogen exchanger regulatory factor 1) (Solute carrier family 9 isoform 3 regulatory f	chr17 70256378
NM_004263	NM_004263	Semaphorin-4F precursor (Semaphorin W) (Sema W) (Semaphorin M) (Sema M).	chr2 74734900
NM_004295	NM_004295	TNF receptor-associated factor 4 (Cysteine-rich domain associated with RING and Traf domains protein 1) (Malignant 62) (RING finger protein 83).	chr17 24095172
NM_004301	NM_004301	Actin-like protein 6A (53 kDa BRG1-associated factor A) (Actin-related protein Baf53a) (ArpNbeta).	chr3 180763401
NM_004301	NM_178042	Actin-like protein 6A (53 kDa BRG1-associated factor A) (Actin-related protein Baf53a) (ArpNbeta).	chr3 180763401
NM_004302	NM_004302	Activin receptor type 1B precursor (EC 2.7.1.37) (ACTR-IB) (Serine/threonine-protein kinase receptor R2) (SKR2) (Activin receptor-like kinase 4) (ALK-4).	chr12 50631752
NM_004302	NM_020327	n/a	chr12 50631752
NM_004302	NM_020328	n/a	chr12 50631752
NM_004316	NM_004316	Achaete-scute homolog 1 (HASH1).	chr12 101875593
NM_004336	NM_004336	Mitotic checkpoint serine/threonine-protein kinase BUB1 (EC 2.7.1.37) (hBUB1) (BUB1A).	chr2 111111882
NM_004343	NM_004343	Calreticulin precursor (CRP55) (Calregulin) (HACBP) (ERp60) (grp60).	chr19 12910422
NM_004356	NM_004356	CD81 antigen (26 kDa cell surface protein TAPA-1) (Target of the antiproliferative antibody 1) (Tetraspanin-28) (Tspan-28).	chr11 2355122
NM_004362	NM_004362	Calmegin precursor.	chr4 141529058
NM_004365	NM_004365	Centrin-3.	chr5 89725286
NM_004370	BC050587	COL12A1 protein.	chr6 75850762
NM_004370	NM_004370	Collagen alpha-1(XII) chain precursor.	chr6 75850762
NM_004370	NM_080645	Collagen, type XII, alpha 1 (Fragment).	chr6 75850762
NM_004379	NM_004379	Hypothetical protein CREB1 (Fragment).	chr2 208102930
NM_004379	NM_134442	cAMP response element binding protein (CREB).	chr2 208102930
NM_004382	NM_004382	Corticotropin-releasing factor receptor 1 precursor (CRF-R) (CRF1) (Corticotropin-releasing hormone receptor 1) (CRH-R 1).	chr17 41217448
NM_004387	NM_004387	Homeobox protein Nkx-2.5 (Homeobox protein NK-2 homolog E) (Cardiac- specific homeobox) (Homeobox protein CSX).	chr5 172591743
NM_004390	NM_004390	Cathepsin H precursor (EC 3.4.22.16) [Contains: Cathepsin H mini chain; Cathepsin H heavy chain; Cathepsin H light chain].	chr15 77001162
NM_004390	NM_148979	Hypothetical protein DKFZp686B24257 (Fragment).	chr15 77001162
NM_004391	NM_004391	Cytochrome P450 8B1 (EC 1.14.-.-) (CYPVIIIB1) (Sterol 12-alpha- hydroxylase) (7 alpha-hydroxy-4-cholesten-3-one 12-alpha-hydroxylase).	chr3 42888688
NM_004393	NM_004393	Dystroglycan precursor (Dystrophin-associated glycoprotein 1) [Contains: Alpha-dystroglycan (Alpha-DG); Beta-dystroglycan (Beta- DG)].	chr3 49482594
NM_004395	NM_004395	Drebrin (Developmentally regulated brain protein).	chr5 176816219
NM_004395	NM_080881	Hypothetical protein DKFZp434D064.	chr5 176816219
NM_004405	NM_004405	Homeobox protein DLX-2.	chr2 172672412
NM_004416	NM_004416	Deltex protein 1 (Deltex-1) (Deltex1) (hDTX1).	chr12 111980044
NM_004418	AF331843	Phosphatase.	chr2 96172643
NM_004418	NM_004418	Dual specificity protein phosphatase 2 (EC 3.1.3.48) (EC 3.1.3.16) (Dual specificity protein phosphatase PAC-1).	chr2 96172643
NM_004420	NM_004420	Dual specificity protein phosphatase 8 (EC 3.1.3.48) (EC 3.1.3.16) (Dual specificity protein phosphatase hVH-5).	chr11 1533958
NM_004429	NM_004429	Ephrin-B1 precursor (EPH-related receptor tyrosine kinase ligand 2) (LERK-2) (ELK ligand) (ELK-L).	chrX 67965555
NM_004430	NM_004430	Early growth response protein 3 (EGR-3) (Zinc finger protein pilot).	chr8 22601118
NM_004431	NM_004431	Ephrin type-A receptor 2 precursor (EC 2.7.1.112) (Tyrosine-protein kinase receptor ECK) (Epithelial cell kinase).	chr1 16323419
NM_004443	NM_004443	Ephrin type-B receptor 3 precursor (EC 2.7.1.112) (Tyrosine-protein kinase receptor HEK-2).	chr3 185762280
NM_004451	L38487	ESRRA protein (Estrogen-related receptor alpha).	chr11 63829619
NM_004451	NM_004451	Steroid hormone receptor ERR1 (Estrogen-related receptor, alpha) (ERR- alpha) (Estrogen receptor-like 1).	chr11 63829619
NM_004455	NM_004455	Exostosin-like 1 (EC 2.4.1.224) (Glucuronosyl-N-acetylglucosaminyl- proteoglycan 4-alpha-N-acetylglucosaminyltransferase) (Exostosin-L) (Multiple exostosis-like protein).	chr1 26220857
NM_004462	NM_004462	Squalene synthetase (EC 2.5.1.21) (SQS) (SS) (Farnesyl-diphosphate farnesyltransferase) (FPP:FPP farnesyltransferase).	chr8 11697598
NM_004463	NM_004463	FYVE, RhoGEF and PH domain containing protein 1 (Faciogenital dysplasia 1 protein) (Zinc finger FYVE domain containing protein 3) (Rho/Rac guanine nucleotide exchange factor FGD1) (Rho/Rac GEF).	chrX 54488613
NM_004465	NM_004465	Fibroblast growth factor 10 precursor (FGF-10) (Keratinocyte growth factor 2).	chr5 44340853
NM_004469	NM_004469	Vascular endothelial growth factor D precursor (VEGF-D) (c-fos-induced growth factor) (FIGF).	chrX 15273639
NM_004470	NM_004470	FK506-binding protein 2 precursor (EC 5.2.1.8) (Peptidyl-prolyl cis- trans isomerase) (PPIase) (Rotamase) (13 kDa FKBP) (FKBP-13).	chr11 63764988
NM_004475	BC003683	Similar to flotillin 2.	chr17 24230483
NM_004475	NM_004475	Flotillin-2 (Epidermal surface antigen) (ESA).	chr17 24230483
NM_004479	NM_004479	Alpha-(1,3)-fucosyltransferase (EC 2.4.1.-) (Galactoside 3-L- fucosyltransferase) (Fucosyltransferase 7) (FUCT-VII) (Selectin-ligand synthase).	chr9 139044446
NM_004480	NM_004480	Fucosyltransferase 8, isoform c (Hypothetical protein).	chr14 64949287
NM_004488	NM_004488	Platelet glycoprotein V precursor (GPV) (CD42D).	chr3 195595348
NM_004492	NM_004492	Transcription initiation factor IIA gamma chain (TFIIA P12 subunit) (TFIIA-12) (TFIIAS) (TFIIA-gamma).	chr15 57718357
NM_004496	NM_004496	Hepatocyte nuclear factor 3-alpha (HNF-3A) (Forkhead box protein A1).	chr14 37128941
NM_004497	NM_004497	Hepatocyte nuclear factor 3-gamma (HNF-3G) (Forkhead box protein A3) (Fork head-related protein FKH H3).	chr19 51059357
NM_004498	NM_004498	Hepatocyte nuclear factor 6 (HNF-6) (One cut domain family member 1).	chr15 50836644
NM_004499	NM_004499	n/a	chr5 177564113
NM_004499	NM_031266	Heterogeneous nuclear ribonucleoprotein A/B (hnRNP A/B) (APOBEC-1 binding protein 1) (ABBP-1).	chr5 177564113
NM_004502	NM_004502	Homeobox protein Hox-B7 (Hox-2C) (HHO.C1).	chr17 44039600
NM_004503	NM_004503	Homeobox protein Hox-C6 (Hox-3C) (HHO.C8) (CP25).	chr12 52708460
NM_004521	NM_004521	Kinesin heavy chain (Ubiquitous kinesin heavy chain) (UKHC).	chr10 32340076
NM_004540	NM_004540	Neural cell adhesion molecule 2 precursor (N-CAM 2).	chr21 21292503
NM_004555	NM_004555	Nuclear factor of activated T-cells, cytoplasmic 3 (NF-ATc3) (NFATc3) (T cell transcription factor NFAT4) (NF-AT4) (NFATx).	chr16 66676875
NM_004555	NM_173163	Nuclear factor of activated T-cells, cytoplasmic 3 (NF-ATc3) (NFATc3) (T cell transcription factor NFAT4) (NF-AT4) (NFATx).	chr16 66676875
NM_004555	NM_173164	Cytoplasmic nuclear factor of activated T-cells 3 isoform 4 variant (Fragment).	chr16 66676875
NM_004555	NM_173165	Nuclear factor of activated T-cells, cytoplasmic 3 (NF-ATc3) (NFATc3) (T cell transcription factor NFAT4) (NF-AT4) (NFATx).	chr16 66676875
NM_004560	NM_004560	Tyrosine-protein kinase transmembrane receptor ROR2 precursor (EC 2.7.1.112) (Neurotrophic tyrosine kinase, receptor-related 2).	chr9 93524704
NM_004561	NM_004561	Putative transcription factor Ovo-like 1 (hOvo1).	chr11 65311104
NM_004565	NM_004565	Peroxisomal membrane protein PEX14 (Peroxin-14) (Peroxisomal membrane anchor protein PEX14) (PTS1 receptor docking protein).	chr1 10457605
NM_004566	AF056320	6-phosphofructo-2-kinase/fructose-2,6-biphosphatase 3 (6PF-2-K/Fru- 2,6-P2ASE brain/placenta-type isozyme) (iPFK-2) [Includes: 6- phosphofructo-2-kinase (EC 2.7.1.105); Fructose-2,6-bisphosphatase (EC 3.1.3.46)].	chr10 6284919
NM_004566	NM_004566	6-phosphofructo-2-kinase/fructose-2,6-biphosphatase 3 (6PF-2-K/Fru- 2,6-P2ASE brain/placenta-type isozyme) (iPFK-2) [Includes: 6- phosphofructo-2-kinase (EC 2.7.1.105); Fructose-2,6-bisphosphatase (EC 3.1.3.46)].	chr10 6284900
NM_004575	NM_004575	POU domain, class 4, transcription factor 2 (Brain-specific homeobox/POU domain protein 3B) (Brn-3B).	chr4 147779537
NM_004596	NM_004596	U1 small nuclear ribonucleoprotein A (U1 snRNP protein A) (U1A protein) (U1-A).	chr19 45948618
NM_004608	NM_004608	T-box transcription factor TBX6 (T-box protein 6).	chr16 30004582
NM_004612	BC071181	TGFBR1 protein.	chr9 100907213
NM_004612	NM_004612	TGF-beta receptor type I precursor (EC 2.7.1.37) (TGFR-1) (TGF-beta type I receptor) (Serine/threonine-protein kinase receptor R4) (SKR4) (Activin receptor-like kinase 5) (ALK-5).	chr9 100907232
NM_004622	NM_004622	Translin.	chr2 122229590
NM_004629	NM_004629	Fanconi anemia group G protein (Protein FACG) (DNA-repair protein XRCC9).	chr9 35063834
NM_004646	NM_004646	Nephrin precursor (Renal glomerulus-specific cell adhesion receptor).	chr19 41008705
NM_004661	NM_004661	Cell division cycle protein 23 homolog (Anaphase promoting complex subunit 8) (APC8) (Cyclosome subunit 8).	chr5 137551239
NM_004674	CR602034	n/a	chr8 38082222
NM_004674	NM_004674	Set1/Ash2 histone methyltransferase complex subunit ASH2 (ASH2-like protein).	chr8 38082222
NM_004701	NM_004701	G2/mitotic-specific cyclin-B2.	chr15 57184611
NM_004704	NM_004704	U3 small nucleolar RNA-interacting protein 2 (U3 small nucleolar ribonucleoproptein-associated 55-kDa protein) (U3 snoRNP-associated 55-kDa protein) (U3-55K).	chr3 51942485
NM_004715	BC047999	n/a	chr18 75540788
NM_004715	NM_004715	RNA polymerase II subunit A C-terminal domain phosphatase (EC 3.1.3.16) (TFIIF-associating CTD phosphatase).	chr18 75540788
NM_004715	NM_048368	n/a	chr18 75540788
NM_004722	NM_004722	Adapter-related protein complex 4 mu 1 subunit (Mu subunit of AP-4) (AP-4 adapter complex mu subunit) (Mu-adaptin-related protein 2) (mu- ARP2) (mu4).	chr7 99537115
NM_004724	NM_004724	Centromere/kinetochore protein zw10 homolog.	chr11 113109120
NM_004744	NM_004744	Lecithin retinol acyltransferase (EC 2.3.1.135) (Phosphatidylcholine-- retinol O-acyltransferase).	chr4 155884612
NM_004752	NM_004752	Chorion-specific transcription factor GCMb (Glial cells missing homolog 2) (GCM motif protein 2) (hGCMb).	chr6 10981449
NM_004766	NM_004766	Coatomer beta' subunit (Beta'-coat protein) (Beta'-COP) (p102).	chr3 140559124
NM_004776	NM_004776	Beta-1,4-galactosyltransferase 5 (EC 2.4.1.-) (Beta-1,4-GalTase 5) (Beta4Gal-T5) (b4Gal-T5) (UDP-galactose:beta-N-acetylglucosamine beta- 1,4-galactosyltransferase 5) (UDP-Gal:beta-GlcNAc beta-1,4- galactosyltransferase 5) (Beta-1,4-GalT II).	chr20 47682891
NM_004779	NM_004779	CCR4-NOT transcription complex subunit 8 (CCR4-associated factor 8) (CAF1-like protein) (CALIFp) (CAF2).	chr5 154218390
NM_004787	NM_004787	Slit homolog 2 protein precursor (Slit-2) [Contains: Slit homolog 2 protein N-product; Slit homolog 2 protein C-product].	chr4 19864332
NM_004798	NM_004798	Kinesin-like protein KIF3B (Microtubule plus end-directed kinesin motor 3B) (HH0048).	chr20 30329127
NM_004800	NM_004800	Transmembrane 9 superfamily protein member 2 precursor (p76).	chr13 98951728
NM_004820	NM_004820	Cytochrome P450 7B1 (EC 1.14.13.-) (Oxysterol 7-alpha-hydroxylase).	chr8 65671245
NM_004821	NM_004821	Heart- and neural crest derivatives-expressed protein 1 (Extraembryonic tissues, heart, autonomic nervous system and neural crest derivatives-expressed protein 1) (eHAND).	chr5 153834725
NM_004861	NM_004861	Galactosylceramide sulfotransferase (EC 2.8.2.11) (GalCer sulfotransferase) (Cerebroside sulfotransferase) (3'- phosphoadenylylsulfate:galactosylceramide 3'-sulfotransferase) (3'- phosphoadenosine-5'phosphosulfate:GalCer sulfotransferase).	chr22 29280623
NM_004863	NM_004863	Serine palmitoyltransferase 2 (EC 2.3.1.50) (Long chain base biosynthesis protein 2) (LCB 2) (Serine-palmitoyl-CoA transferase 2) (SPT 2).	chr14 77043024
NM_004898	NM_004898	Circadian locomoter output cycles kaput protein (hCLOCK).	chr4 55993416
NM_004902	NM_004902	RNA-binding region (RNP1, RRM) containing 2 (Fragment).	chr20 33754944
NM_004902	NM_184234	RNA-binding region containing protein 2 (Hepatocellular carcinoma protein 1) (Splicing factor HCC1).	chr20 33754944
NM_004902	NM_184241	Hypothetical protein DKFZp686A11192.	chr20 33754944
NM_004902	NM_184244	RNA-binding region (RNP1, RRM) containing 2 (Fragment).	chr20 33754944
NM_004925	NM_004925	Aquaporin-3 (AQP-3).	chr9 33431161
NM_004926	NM_004926	Butyrate response factor 1 (TIS11B protein) (EGF-response factor 1) (ERF-1).	chr14 68324127
NM_004933	NM_004933	Muscle-cadherin precursor (M-cadherin) (Cadherin-15) (Cadherin-14).	chr16 87765663
NM_004944	NM_004944	Deoxyribonuclease gamma precursor (EC 3.1.21.-) (DNase gamma) (Deoxyribonuclease I-like 3) (DNase I homolog protein DHP2) (Liver and spleen DNase) (LS-DNase) (LSD).	chr3 58153393
NM_004946	NM_004946	Dedicator of cytokinesis protein 2.	chr5 168996870
NM_004948	NM_004948	Desmocollin-1 precursor (Desmosomal glycoprotein 2/3) (DG2/DG3).	chr18 26963213
NM_004948	NM_024421	Desmocollin-1 precursor (Desmosomal glycoprotein 2/3) (DG2/DG3).	chr18 26963213
NM_004959	AK090858	Hypothetical protein FLJ33539.	chr9 126283332
NM_004959	NM_004959	Steroidogenic factor 1 (STF-1) (SF-1) (Adrenal 4 binding protein) (Steroid hormone receptor Ad4BP) (Fushi tarazu factor homolog 1).	chr9 126283336
NM_004964	NM_004964	Histone deacetylase 1 (HD1).	chr1 32530294
NM_004973	NM_004973	Jumonji protein (Jumonji/ARID domain-containing protein 2).	chr6 15354505
NM_004979	NM_004979	Potassium voltage-gated channel subfamily D member 1 (Voltage-gated potassium channel subunit Kv4.1).	chrX 48703582
NM_004980	NM_004980	Potassium voltage-gated channel subfamily D member 3 (Voltage-gated potassium channel subunit Kv4.3).	chr1 112119976
NM_004980	NM_172198	Potassium voltage-gated channel, Shal-related subfamily, member 3.	chr1 112119976
NM_004995	NM_004995	Matrix metalloproteinase-14 precursor (EC 3.4.24.80) (MMP-14) (Membrane-type matrix metalloproteinase 1) (MT-MMP 1) (MTMMP1) (Membrane-type-1 matrix metalloproteinase) (MT1-MMP) (MT1MMP) (MMP- X1).	chr14 22375632
NM_004998	NM_004998	Myosin Ie (Myosin Ic).	chr15 57215855
NM_005013	NM_005013	Nucleobindin 2 precursor (DNA-binding protein NEFA) (Gastric cancer antigen Zg4).	chr11 17254887
NM_005029	NM_005029	Pituitary homeobox 3 (Homeobox protein PITX3).	chr10 103979935
NM_005030	AB084459	Polo-like kinase 1 delta.	chr16 23597751
NM_005030	NM_005030	Serine/threonine-protein kinase PLK1 (EC 2.7.1.37) (Polo-like kinase 1) (PLK-1) (Serine/threonine-protein kinase 13) (STPK13).	chr16 23597701
NM_005034	NM_005034	DNA-directed RNA polymerases I, II, and III 7.0 kDa polypeptide (EC 2.7.7.6) (ABC10-alpha) (RPB7.0) (RPB10alpha) (RPABC4).	chr8 101232014
NM_005050	NM_005050	ATP-binding cassette sub-family D member 4 (Peroxisomal membrane protein 69) (PMP69) (Peroxisomal membrane protein 1-like) (PXMP1-L) (P70R).	chr14 73821883
NM_005050	NM_020323	Full-length cDNA clone CS0DI065YF14 of Placenta of Homo sapiens (human) (Fragment).	chr14 73821883
NM_005050	NM_020325	ATP-binding cassette sub-family D member 4 (Peroxisomal membrane protein 69) (PMP69) (Peroxisomal membrane protein 1-like) (PXMP1-L) (P70R).	chr14 73821883
NM_005050	NM_020326	Full-length cDNA clone CS0DI065YF14 of Placenta of Homo sapiens (human) (Fragment).	chr14 73821883
NM_005067	NM_005067	Ubiquitin ligase SIAH2 (EC 6.3.2.-) (Seven in absentia homolog 2) (Siah-2) (hSiah2).	chr3 151941600
NM_005068	NM_005068	Single-minded homolog 1.	chr6 100943471
NM_005069	NM_005069	Single-minded homolog 2.	chr21 36993860
NM_005077	NM_005077	Transducin-like enhancer protein 1 (ESG1) (E(Sp1) homolog).	chr9 83388419
NM_005082	NM_005082	Tripartite motif protein 25 (Zinc finger protein 147) (Estrogen- responsive finger protein) (Efp) (RING finger protein 147).	chr17 52320268
NM_005086	NM_005086	Sarcospan (K-ras oncogene-associated protein) (Kirsten-ras-associated protein).	chr12 26239788
NM_005089	NM_005089	U2 small nuclear ribonucleoprotein auxiliary factor 35 kDa subunit related-protein 2 (U2(RNU2) small nuclear RNA auxillary factor 1-like 2).	chrX 15718515
NM_005113	NM_005113	Golgin subfamily A member 5 (Golgin-84) (RET-fused gene 5 protein) (Ret-II protein).	chr14 92330402
NM_005132	NM_005132	Meiotic recombination protein REC8-like 1 (Cohesin Rec8p).	chr14 23711073
NM_005155	AF020544	Multiple EGF-like-domain protein 8 precursor (Vascular endothelial- statin 2) (VE-statin-2).	chr6 32229599
NM_005155	AF020544	Multiple EGF-like-domain protein 8 precursor (Vascular endothelial- statin 2) (VE-statin-2).	chr6_cox_hap1 3528796
NM_005155	AF020544	Multiple EGF-like-domain protein 8 precursor (Vascular endothelial- statin 2) (VE-statin-2).	chr6_qbl_hap2 3336581
NM_005155	NM_005155	Palmitoyl-protein thioesterase 2 precursor (EC 3.1.2.22) (Palmitoyl- protein hydrolase 2) (PPT-2) (G14).	chr6 32229599
NM_005155	NM_005155	Palmitoyl-protein thioesterase 2 precursor (EC 3.1.2.22) (Palmitoyl- protein hydrolase 2) (PPT-2) (G14).	chr6_cox_hap1 3528796
NM_005155	NM_005155	Palmitoyl-protein thioesterase 2 precursor (EC 3.1.2.22) (Palmitoyl- protein hydrolase 2) (PPT-2) (G14).	chr6_qbl_hap2 3336581
NM_005159	NM_005159	Actin, alpha cardiac (Alpha-cardiac actin).	chr15 32869723
NM_005169	NM_005169	Paired mesoderm homeobox protein 2A (Paired-like homeobox 2A) (Aristaless homeobox protein homolog) (ARIX1 homeodomain protein).	chr11 71627769
NM_005170	NM_005170	Achaete-scute homolog 2 (HASH2).	chr11 2246304
NM_005171	NM_005171	Cyclic AMP-dependent transcription factor ATF-1 (Activating transcription factor 1) (TREB36 protein).	chr12 49444127
NM_005172	NM_005172	Atonal protein homolog 1 (Helix-loop-helix protein hATH-1).	chr4 94969100
NM_005173	NM_005173	n/a	chr17 3773917
NM_005173	NM_174953	Sarcoplasmic/endoplasmic reticulum calcium ATPase 3 (EC 3.6.3.8) (Calcium pump 3) (SERCA3) (SR Ca(2+)-ATPase 3).	chr17 3773917
NM_005173	NM_174954	Sarcoplasmic/endoplasmic reticulum calcium ATPase 3 (EC 3.6.3.8) (Calcium pump 3) (SERCA3) (SR Ca(2+)-ATPase 3).	chr17 3773917
NM_005173	NM_174955	Sarcoplasmic/endoplasmic reticulum calcium ATPase 3 (EC 3.6.3.8) (Calcium pump 3) (SERCA3) (SR Ca(2+)-ATPase 3).	chr17 3773917
NM_005173	NM_174956	Sarcoplasmic/endoplasmic reticulum calcium ATPase 3 (EC 3.6.3.8) (Calcium pump 3) (SERCA3) (SR Ca(2+)-ATPase 3).	chr17 3773917
NM_005173	NM_174957	n/a	chr17 3773917
NM_005180	NM_005180	Polycomb group RING finger protein 4 (Polycomb complex protein BMI-1) (RING finger protein 51).	chr10 22650145
NM_005188	NM_005188	CBL E3 ubiquitin protein ligase (EC 6.3.2.-) (Signal transduction protein CBL) (Proto-oncogene c-CBL) (Casitas B-lineage lymphoma proto- oncogene) (RING finger protein 55).	chr11 118582199
NM_005189	NM_005189	Chromobox protein homolog 2.	chr17 75366587
NM_005191	NM_005191	T lymphocyte activation antigen CD80 precursor (Activation B7-1 antigen) (CTLA-4 counter-receptor B7.1) (B7) (BB1).	chr3 120725831
NM_005194	NM_005194	CCAAT/enhancer binding protein beta (C/EBP beta) (Nuclear factor NF- IL6) (Transcription factor 5).	chr20 48240782
NM_005199	NM_005199	Acetylcholine receptor protein, gamma subunit precursor.	chr2 233112680
NM_005211	NM_005211	Macrophage colony-stimulating factor 1 receptor precursor (CSF-1-R) (EC 2.7.1.112) (Fms proto-oncogene) (c-fms) (CD115 antigen).	chr5 149413050
NM_005215	NM_005215	Netrin receptor DCC precursor (Tumor suppressor protein DCC) (Colorectal cancer suppressor).	chr18 48121155
NM_005220	NM_005220	Homeobox protein DLX-3.	chr17 45422374
NM_005221	NM_005221	Homeobox protein DLX-5.	chr7 96487639
NM_005224	NM_005224	AT-rich interactive domain-containing protein 3A (ARID domain- containing protein 3A) (B-cell regulator of IgH transcription) (Bright) (E2F-binding protein 1).	chr19 880328
NM_005226	NM_005226	Sphingosine 1-phosphate receptor Edg-3 (S1P receptor Edg-3) (Endothelial differentiation G-protein coupled receptor 3) (Sphingosine 1-phosphate receptor 3) (S1P3).	chr9 90796181
NM_005228	BC094761	EGFR protein.	chr7 55054207
NM_005228	NM_005228	Epidermal growth factor receptor precursor (EC 2.7.1.112) (Receptor tyrosine-protein kinase ErbB-1).	chr7 55054218
NM_005228	NM_201282	Epidermal growth factor receptor short isoform.	chr7 55054218
NM_005228	NM_201283	Epidermal growth factor receptor short isoform.	chr7 55054218
NM_005228	NM_201284	Truncated epidermal growth factor receptor (Fragment).	chr7 55054218
NM_005230	NM_005230	ETS domain protein Elk-3 (ETS-related protein NET) (ETS-related protein ERP) (SRF accessory protein 2) (SAP-2).	chr12 95112337
NM_005233	NM_005233	Ephrin type-A receptor 3 precursor (EC 2.7.1.112) (Tyrosine-protein kinase receptor ETK1) (HEK) (HEK4).	chr3 89239363
NM_005234	NM_005234	Orphan nuclear receptor EAR-2 (V-erbA-related protein EAR-2).	chr19 17203694
NM_005239	NM_005239	C-ets-2 protein.	chr21 39099718
NM_005242	NM_005242	Proteinase-activated receptor 2 precursor (PAR-2) (Thrombin receptor- like 1) (Coagulation factor II receptor-like 1) (G-protein coupled receptor 11).	chr5 76150609
NM_005252	NM_005252	Proto-oncogene protein c-fos (Cellular oncogene fos) (G0/G1 switch regulatory protein 7).	chr14 74815283
NM_005253	NM_005253	Fos-related antigen 2.	chr2 28469282
NM_005266	NM_005266	Gap junction alpha-5 protein (Connexin-40) (Cx40).	chr1 145695516
NM_005268	NM_005268	Gap junction beta-5 protein (Connexin-31.1) (Cx31.1).	chr1 34993307
NM_005272	NM_005272	Guanine nucleotide-binding protein G(t), alpha-2 subunit (Transducin alpha-2 chain).	chr1 109947236
NM_005316	NM_005316	TFIIH basal transcription factor complex p62 subunit (Basic transcription factor 62 kDa subunit) (BTF2-p62) (General transcription factor IIH polypeptide 1).	chr11 18300718
NM_005329	NM_005329	Hyaluronan synthase 3 (EC 2.4.1.212) (Hyaluronate synthase 3) (Hyaluronic acid synthase 3) (HA synthase 3).	chr16 67698943
NM_005349	NM_005349	Recombining binding protein suppressor of hairless (J kappa- recombination signal binding protein) (RBP-J kappa) (RBP-J) (RBP-JK) (CBF-1).	chr4 25930429
NM_005349	NM_203283	Recombining binding protein suppressor of hairless, isoform 3.	chr4 25930429
NM_005381	AK091742	Hypothetical protein FLJ34423.	chr2 232027703
NM_005381	AK122805	Hypothetical protein FLJ34423.	chr2 232027705
NM_005381	NM_005381	Nucleolin (Protein C23).	chr2 232027703
NM_005392	BC064613	PHF2 protein.	chr9 95378849
NM_005392	NM_005392	PHD finger protein 2 (GRC5).	chr9 95378850
NM_005413	NM_005413	Homeobox protein SIX3 (Sine oculis homeobox homolog 3).	chr2 45022364
NM_005425	NM_005425	Nuclear transition protein 2 (TP-2) (TP2).	chr16 11269214
NM_005431	NM_005431	DNA-repair protein XRCC2 (X-ray repair cross-complementing protein 2).	chr7 151974521
NM_005432	NM_005432	DNA-repair protein XRCC3 (X-ray repair cross-complementing protein 3).	chr14 103233707
NM_005438	NM_005438	Fos-related antigen 1 (FRA-1).	chr11 65416267
NM_005439	NM_005439	Myeloid leukemia factor 2 (Myelodysplasia-myeloid leukemia factor 2).	chr12 6727430
NM_005441	NM_005441	Chromatin assembly factor 1 subunit B (CAF-1 subunit B) (Chromatin assembly factor I p60 subunit) (CAF-I 60 kDa subunit) (CAF-Ip60) (M- phase phosphoprotein 7).	chr21 36679558
NM_005442	NM_005442	Eomesodermin homolog.	chr3 27732890
NM_005445	NM_005445	Structural maintenance of chromosome 3 (Chondroitin sulfate proteoglycan 6) (Chromosome-associated polypeptide) (hCAP) (Bamacan) (Basement membrane-associated chondroitin proteoglycan).	chr10 112317438
NM_005497	NM_005497	Gap junction alpha-7 protein (Connexin-45) (Cx45).	chr17 40237112
NM_005515	NM_005515	Homeobox protein HB9.	chr7 156490307
NM_005517	NM_005517	Nonhistone chromosomal protein HMG-17 (High-mobility group nucleosome binding domain 2).	chr1 26671500
NM_005523	NM_005523	Homeobox protein Hox-A11 (Hox-1I).	chr7 27187301
NM_005526	NM_005526	Heat shock factor protein 1 (HSF 1) (Heat shock transcription factor 1) (HSTF 1).	chr8 145486090
NM_005535	NM_005535	Interleukin-12 receptor beta-1 chain precursor (IL-12R-beta1) (Interleukin-12 receptor beta) (IL-12 receptor beta component) (IL- 12RB1).	chr19 18031370
NM_005547	NM_005547	Involucrin.	chr1 151147662
NM_005557	NM_005557	Keratin, type I cytoskeletal 16 (Cytokeratin-16) (CK-16) (Keratin-16) (K16).	chr17 37019558
NM_005570	NM_005570	ERGIC-53 protein precursor (ER-Golgi intermediate compartment 53 kDa protein) (Lectin, mannose-binding 1) (Gp58) (Intracellular mannose- specific lectin MR60).	chr18 55148087
NM_005590	NM_005590	MRE11A protein (MRE11 meiotic recombination 11 homolog A) (S. cerevisiae).	chr11 93790114
NM_005590	NM_005591	Double-strand break repair protein MRE11A (MRE11 homolog 1) (MRE11 meiotic recombination 11 homolog A).	chr11 93790114
NM_005593	NM_005593	Myogenic factor 5 (Myf-5).	chr12 79634931
NM_005597	NM_005597	n/a	chr19 3317572
NM_005602	NM_005602	Claudin-11 (Oligodendrocyte-specific protein).	chr3 171619358
NM_005610	NM_005610	Chromatin assembly factor 1 subunit C (CAF-1 subunit C) (Chromatin assembly factor I p48 subunit) (CAF-I 48 kDa subunit) (CAF-Ip48) (Retinoblastoma binding protein p48) (Retinoblastoma-binding protein 4) (RBBP-4) (MSI1 protein homolog).	chr1 32889410
NM_005619	NM_005619	Reticulon-2 (Neuroendocrine-specific protein-like 1) (NSP-like protein 1) (NSPLI).	chr19 50680390
NM_005619	NM_206900	n/a	chr19 50680390
NM_005619	NM_206902	Truncated RTN2-B2.	chr19 50680390
NM_005626	NM_005626	Splicing factor, arginine/serine-rich 4 (Pre-mRNA splicing factor SRP75) (SRP001LB).	chr1 29346951
NM_005627	AK055077	OTTHUMP00000017246.	chr6 134532081
NM_005627	NM_005627	Serine/threonine-protein kinase Sgk1 (EC 2.7.1.37) (Serum/glucocorticoid-regulated kinase 1).	chr6 134532081
NM_005632	NM_005632	Small optic lobes homolog.	chr16 517856
NM_005639	NM_005639	Synaptotagmin-1 (Synaptotagmin I) (SytI) (p65).	chr12 78135413
NM_005641	NM_005641	Transcription initiation factor TFIID subunit 6 (Transcription initiation factor TFIID 70 kDa subunit) (TAF(II)70) (TAFII-70) (TAFII- 80) (TAFII80).	chr7 99542637
NM_005642	NM_005642	Transcription initiation factor TFIID subunit 7 (Transcription initiation factor TFIID 55 kDa subunit) (TAF(II)55) (TAFII-55) (TAFII55).	chr5 140678241
NM_005644	NM_005644	Transcription initiation factor TFIID subunit 12 (Transcription initiation factor TFIID 20/15 kDa subunits) (TAFII-20/TAFII-15) (TAFII20/TAFII15).	chr1 28802199
NM_005645	NM_005645	Transcription initiation factor TFIID subunit 13 (Transcription initiation factor TFIID 18 kDa subunit) (TAF(II)18) (TAFII-18) (TAFII18).	chr1 109408520
NM_005648	NM_005648	Transcription elongation factor B polypeptide 1 (RNA polymerase II transcription factor SIII subunit C) (SIII p15) (Elongin C) (EloC) (Elongin 15 kDa subunit).	chr8 75021187
NM_005649	NM_005649	Zinc finger protein 354A (Transcription factor 17) (Zinc finger protein eZNF).	chr5 178071136
NM_005650	NM_005650	Transcription factor 20 (Stromelysin 1 PDGF-responsive element-binding protein) (SPRE-binding protein) (Nuclear factor SPBP) (AR1).	chr22 40885962
NM_005650	NM_181492	n/a	chr22 40885962
NM_005652	NM_005652	Telomeric repeat binding factor 2 (TTAGGG repeat binding factor 2) (Telomeric DNA binding protein).	chr16 67947035
NM_005707	NM_005707	Programmed cell death protein 7 (ES18) (HES18).	chr15 63196770
NM_005708	NM_005708	Glypican-6 precursor.	chr13 92677095
NM_005720	NM_005720	Actin-related protein 2/3 complex subunit 1B (ARP2/3 complex 41 kDa subunit) (p41-ARC).	chr7 98810264
NM_005721	NM_005721	Actin-like protein 3 (Actin-related protein 3).	chr2 114364006
NM_005733	NM_005733	Kinesin family member 20A (Rabkinesin-6) (Rab6-interacting kinesin- like protein) (GG10_2).	chr5 137543247
NM_005735	NM_005735	Beta-centractin (Actin-related protein 1B) (ARP1B).	chr2 97638862
NM_005740	NM_005740	Dynein light chain 4, axonemal.	chr22 37504458
NM_005755	NM_005755	Interleukin-27 beta chain precursor (IL-27B) (Epstein-Barr virus- induced gene 3 protein) (EBV-induced gene 3 protein).	chr19 4180539
NM_005760	NM_005760	CCAAT/enhancer binding protein zeta (CCAAT-box-binding transcription factor) (CCAAT-binding factor) (CBF).	chr2 37282284
NM_005772	NM_005772	RNA 3'-terminal phosphate cyclase-like protein.	chr9 4782936
NM_005796	NM_005796	Nuclear transport factor 2 (NTF-2) (Placental protein 15) (PP15).	chr16 66438319
NM_005797	NM_005797	Epithelial V-like antigen 1 precursor.	chr11 117629344
NM_005803	NM_005803	Flotillin-1.	chr6 30803491
NM_005803	NM_005803	Flotillin-1.	chr6_cox_hap1 2144085
NM_005803	NM_005803	Flotillin-1.	chr6_qbl_hap2 1942391
NM_005829	NM_005829	Adapter-related protein complex 3 sigma 2 subunit (Sigma-adaptin 3b) (AP-3 complex sigma-3B subunit) (Sigma-3B-adaptin).	chr15 88177792
NM_005841	NM_005841	Sprouty homolog 1 (Spry-1).	chr4 124540132
NM_005842	NM_005842	Sprouty homolog 2 (Spry-2).	chr13 79808114
NM_005856	NM_005856	Receptor activity-modifying protein 3 precursor (CRLR activity- modifying-protein 3) (Calcitonin-receptor-like receptor-activity- modifying-protein 3).	chr7 45163923
NM_005859	NM_005859	Transcriptional activator protein PUR-alpha (Purine-rich single- stranded DNA-binding protein alpha).	chr5 139473891
NM_005871	NM_005871	Survival of motor neuron-related splicing factor 30 (SMN-related protein) (30 kDa splicing factor SMNrp) (Survival motor neuron domain containing protein 1).	chr10 112042788
NM_005909	NM_005909	Microtubule-associated protein 1B (MAP 1B) [Contains: MAP1 light chain LC1].	chr5 71438890
NM_005910	NM_005910	Microtubule-associated protein tau, isoform 4.	chr17 41327623
NM_005910	NM_016834	Microtubule-associated protein tau, isoform 4.	chr17 41327623
NM_005910	NM_016835	Microtubule-associated protein tau (Neurofibrillary tangle protein) (Paired helical filament-tau) (PHF-tau).	chr17 41327623
NM_005910	NM_016841	Microtubule-associated protein tau, isoform 4.	chr17 41327623
NM_005914	NM_005914	DNA replication licensing factor MCM4 (CDC21 homolog) (P1-CDC21).	chr8 49036046
NM_005915	NM_005915	DNA replication licensing factor MCM6 (P105MCM).	chr2 136313673
NM_005919	NM_005919	Myocyte-specific enhancer factor 2B (Serum response factor-like protein 2) (XMEF2) (RSRFR2).	chr19 19117378
NM_005924	NM_005924	Homeobox protein MOX-2 (Mesenchyme homeobox 2) (Growth arrest-specific homeobox).	chr7 15617363
NM_005941	NM_005941	Matrix metalloproteinase-16 precursor (EC 3.4.24.-) (MMP-16) (Membrane-type matrix metalloproteinase 3) (MT-MMP 3) (MTMMP3) (Membrane-type-3 matrix metalloproteinase) (MT3-MMP) (MT3MMP) (MMP- X2).	chr8 89118577
NM_005954	NM_005954	Metallothionein-3 (MT-3) (Metallothionein-III) (MT-III) (Growth inhibitory factor) (GIF) (GIFB).	chr16 55180767
NM_005964	AB210026	Myosin-10 (Myosin heavy chain, nonmuscle IIb) (Nonmuscle myosin heavy chain IIb) (NMMHC II-b) (NMMHC-IIB) (Cellular myosin heavy chain, type B) (Nonmuscle myosin heavy chain-B) (NMMHC-B).	chr17 8318268
NM_005964	NM_005964	Myosin-10 (Myosin heavy chain, nonmuscle IIb) (Nonmuscle myosin heavy chain IIb) (NMMHC II-b) (NMMHC-IIB) (Cellular myosin heavy chain, type B) (Nonmuscle myosin heavy chain-B) (NMMHC-B).	chr17 8318255
NM_005967	NM_005967	NGFI-A binding protein 2 (EGR-1 binding protein 2) (Melanoma- associated delayed early response protein) (MADER protein).	chr12 55769156
NM_005982	NM_005982	Homeobox protein SIX1 (Sine oculis homeobox homolog 1).	chr14 60182505
NM_005985	NM_005985	Zinc finger protein SNAI1 (Snail protein homolog) (Sna protein).	chr20 48032933
NM_005992	NM_005992	n/a	chr22 18124225
NM_005992	NM_080646	T-box transcription factor TBX1 (T-box protein 1) (Testis-specific T- box protein).	chr22 18124225
NM_005992	NM_080647	n/a	chr22 18124225
NM_005994	NM_005994	T-box transcription factor TBX2 (T-box protein 2).	chr17 56832038
NM_005995	NM_005995	T-box transcription factor TBX10 (T-box protein 10).	chr11 67155350
NM_006000	NM_006000	Tubulin alpha-1 chain (Alpha-tubulin 1) (Testis-specific alpha- tubulin) (Tubulin H2-alpha).	chr2 219823244
NM_006029	NM_006029	Paraneoplastic antigen Ma1 (Neuron- and testis-specific protein 1) (37 kDa neuronal protein).	chr14 73248238
NM_006068	NM_006068	Toll-like receptor 6 precursor.	chr4 38504802
NM_006078	NM_006078	Voltage-dependent calcium channel gamma-2 subunit (Neuronal voltage- gated calcium channel gamma-2 subunit).	chr22 35290049
NM_006080	NM_006080	Semaphorin-3A precursor (Semaphorin III) (Sema III).	chr7 83428425
NM_006112	DQ160195	Cyclophilin-33B.	chr1 39977159
NM_006112	NM_006112	Peptidyl-prolyl cis-trans isomerase E (EC 5.2.1.8) (PPIase E) (Rotamase E) (Cyclophilin E) (Cyclophilin 33).	chr1 39977116
NM_006112	NM_203456	Peptidylprolyl isomerase E (Cyclophilin E) (Fragment).	chr1 39977116
NM_006121	NM_006121	Keratin, type II cytoskeletal 1 (Cytokeratin-1) (CK-1) (Keratin-1) (K1) (67 kDa cytokeratin) (Hair alpha protein).	chr12 51354720
NM_006135	NM_006135	F-actin capping protein alpha-1 subunit (CapZ alpha-1).	chr1 112963989
NM_006139	NM_006139	T-cell-specific surface glycoprotein CD28 precursor (TP44).	chr2 204279442
NM_006144	NM_006144	Granzyme A precursor (EC 3.4.21.78) (Cytotoxic T-lymphocyte proteinase 1) (Hanukkah factor) (H factor) (HF) (Granzyme-1) (CTL tryptase) (Fragmentin-1).	chr5 54434229
NM_006147	NM_006147	Interferon regulatory factor 6 (IRF-6).	chr1 208027884
NM_006156	NM_006156	NEDD8 precursor (Ubiquitin-like protein Nedd8) (Neddylin).	chr14 23755911
NM_006160	NM_006160	Neurogenic differentiation factor 2 (NeuroD2) (NeuroD-related factor) (NDRF).	chr17 35014573
NM_006161	NM_006161	Neurogenin 1 (Neurogenic differentiation factor 3) (NeuroD3) (Neurogenic basic-helix-loop-helix protein).	chr5 134897878
NM_006164	NM_006164	Nuclear factor erythroid 2 related factor 2 (NF-E2 related factor 2) (NFE2-related factor 2) (Nuclear factor, erythroid derived 2, like 2) (HEBP1).	chr2 177803284
NM_006168	NM_006168	Homeobox protein Nkx-6.1.	chr4 85633459
NM_006186	NM_006186	Orphan nuclear receptor NR4A2 (Orphan nuclear receptor NURR1) (Immediate-early response protein NOT) (Transcriptionally inducible nuclear receptor).	chr2 156889196
NM_006186	NM_173173	Nuclear receptor subfamily 4, group A, member 2, isoform d.	chr2 156889196
NM_006190	NM_006190	Origin recognition complex subunit 2.	chr2 201483139
NM_006196	NM_006196	Poly(rC)-binding protein 1 (Alpha-CP1) (hnRNP-E1) (Nucleic acid- binding protein SUB2.3).	chr2 70168204
NM_006230	NM_006230	DNA polymerase delta subunit 2 (EC 2.7.7.7) (DNA polymerase delta subunit p50).	chr7 44120811
NM_006234	NM_006234	DNA-directed RNA polymerase II 13.3 kDa polypeptide (EC 2.7.7.6) (RPB11).	chr7 101900554
NM_006237	NM_006237	POU domain, class 4, transcription factor 1 (Brain-specific homeobox/POU domain protein 3A) (Brn-3A) (Oct-T1) (Homeobox/POU domain protein RDC-1).	chr13 78071232
NM_006255	NM_006255	Protein kinase C, eta type (EC 2.7.1.-) (nPKC-eta) (PKC-L).	chr14 60858267
NM_006261	NM_006261	Homeobox protein prophet of Pit-1 (PROP-1) (Pituitary-specific homeodomain factor).	chr5 177351841
NM_006262	NM_006262	Peripherin.	chr12 47975175
NM_006265	NM_006265	Double-strand-break repair protein rad21 homolog (hHR21) (Nuclear matrix protein 1) (NXP-1) (SCC1 homolog).	chr8 117927354
NM_006268	CR614117	Zinc-finger protein ubi-d4 (Requiem) (Apoptosis response zinc finger protein) (D4, zinc and double PHD fingers family 2).	chr11 64857928
NM_006268	NM_006268	Zinc-finger protein ubi-d4 (Requiem) (Apoptosis response zinc finger protein) (D4, zinc and double PHD fingers family 2).	chr11 64857921
NM_006272	NM_006272	S-100 calcium-binding protein beta subunit (S-100 protein, beta chain).	chr21 46842958
NM_006284	NM_006284	Transcription initiation factor TFIID subunit 10 (Transcription initiation factor TFIID 30 kDa subunit) (TAF(II)30) (TAFII-30) (TAFII30) (STAF28).	chr11 6588648
NM_006288	AK090996	Thy-1 co-transcribed protein.	chr11 118794096
NM_006288	NM_006288	Thy-1 membrane glycoprotein precursor (Thy-1 antigen) (CDw90) (CD90 antigen).	chr11 118794097
NM_006290	NM_006290	Tumor necrosis factor, alpha-induced protein 3 (EC 3.-.-.-) (Putative DNA binding protein A20) (Zinc finger protein A20).	chr6 138230273
NM_006297	NM_006297	DNA-repair protein XRCC1 (X-ray repair cross-complementing protein 1).	chr19 48739303
NM_006304	NM_006304	26 proteasome complex subunit DSS1 (Deleted in split hand/split foot protein 1) (Split hand/foot deleted protein 1).	chr7 96156016
NM_006305	AK127498	Hypothetical protein FLJ45591.	chr15 66859266
NM_006305	NM_006305	Acidic leucine-rich nuclear phosphoprotein 32 family member A (Potent heat-stable protein phosphatase 2A inhibitor I1PP2A) (Acidic nuclear phosphoprotein pp32) (Cerebellar leucine-rich acidic nuclear protein) (HLA-DR-associated protein I) (PHAPI).	chr15 66859259
NM_006306	NM_006306	Structural maintenance of chromosome 1-like 1 protein (SMC1alpha protein) (DXS423E protein) (Sb1.8).	chrX 53417796
NM_006321	NM_006321	Ariadne-2 protein homolog (ARI-2) (Triad1 protein).	chr3 48931284
NM_006343	NM_006343	Proto-oncogene tyrosine-protein kinase MER precursor (EC 2.7.1.112) (C-mer) (Receptor tyrosine kinase MerTK).	chr2 112372661
NM_006347	NM_006347	Peptidyl-prolyl cis-trans isomerase H (EC 5.2.1.8) (PPIase H) (Rotamase H) (U-snRNP-associated cyclophilin SnuCyp-20) (USA-CYP) (Small nuclear ribonucleoprotein particle-specific cyclophilin H) (CypH).	chr1 42896634
NM_006354	NM_006354	Transcriptional adapter 3-like (ADA3-like protein) (ADA3 homolog) (hADA3).	chr3 9796653
NM_006361	NM_006361	Homeobox protein Hox-B13.	chr17 44157124
NM_006362	NM_006362	Nuclear RNA export factor 1 (Tip-associating protein) (Tip-associated protein) (mRNA export factor TAP).	chr11 62316219
NM_006364	NM_006364	Protein transport protein Sec23A (SEC23-related protein A).	chr14 38570873
NM_006388	NM_006388	Histone acetyltransferase HTATIP (EC 2.3.1.48) (60 kDa Tat interactive protein) (Tip60) (HIV-1 Tat interactive protein) (cPLA(2) interacting protein).	chr11 65236064
NM_006388	NM_182709	HIV-1 Tat interactive protein, 60kDa, isoform 3.	chr11 65236064
NM_006388	NM_182710	Histone acetyltransferase HTATIP (EC 2.3.1.48) (60 kDa Tat interactive protein) (Tip60) (HIV-1 Tat interactive protein) (cPLA(2) interacting protein).	chr11 65236064
NM_006391	NM_006391	Importin-7 (Imp7) (Ran-binding protein 7) (RanBP7).	chr11 9362779
NM_006399	NM_006399	ATF-like basic leucine zipper transcriptional factor B-ATF (SF-HT- activated gene 2) (SFA-2).	chr14 75058536
NM_006404	NM_006404	Endothelial protein C receptor precursor (Endothelial cell protein C receptor) (Activated protein C receptor) (APC receptor) (CD201 antigen).	chr20 33223434
NM_006413	NM_006413	Ribonuclease P protein subunit p30 (EC 3.1.26.5) (RNaseP protein p30) (RNase P subunit 2).	chr10 92621254
NM_006462	NM_006462	OTTHUMP00000029919.	chr20 336755
NM_006462	NM_031227	OTTHUMP00000029919.	chr20 336755
NM_006462	NM_031228	OTTHUMP00000029917 (Fragment).	chr20 336755
NM_006462	NM_031229	Ubiquitin-conjugating enzyme 7-interacting protein 3 (Hepatitis B virus X-associated protein 4) (HBV-associated factor 4) (RING finger protein 54).	chr20 336755
NM_006466	NM_006466	DNA-directed RNA polymerase III 39 kDa polypeptide (EC 2.7.7.6) (RNA polymerase III C39 subunit).	chr20 18396032
NM_006473	NM_006473	TAF6-like RNA polymerase II p300/CBP-associated factor-associated factor 65 kDa subunit 6L (PCAF-associated factor 65 alpha) (PAF65- alpha).	chr11 62295450
NM_006492	NM_006492	Homeobox protein aristaless-like 3 (Proline-rich transcription factor ALX3).	chr1 110404138
NM_006494	NM_006494	ETS domain transcription factor ERF (Ets2 repressor factor).	chr19 47443561
NM_006503	NM_006503	26S protease regulatory subunit 6B (MIP224) (MB67-interacting protein) (TAT-binding protein 7) (TBP-7).	chr19 45168912
NM_006503	NM_153001	n/a	chr19 45168912
NM_006521	AL161985	Hypothetical protein DKFZp761J1810.	chrX 48771183
NM_006521	NM_006521	Hypothetical protein DKFZp761J1810.	chrX 48771185
NM_006527	NM_006527	Histone RNA hairpin-binding protein (Histone stem-loop binding protein).	chr4 1664324
NM_006540	NM_006540	Nuclear receptor coactivator 2 (NCoA-2) (Transcriptional intermediary factor 2).	chr8 71186820
NM_006565	NM_006565	Transcriptional repressor CTCF (CCCTC-binding factor) (CTCFL paralog) (11-zinc finger protein).	chr16 66153964
NM_006568	NM_006568	Cell growth regulator with RING finger domain 1 (Cell growth regulatory gene 19 protein).	chr14 54046336
NM_006579	NM_006579	3-beta-hydroxysteroid-delta(8),delta(7)-isomerase (EC 5.3.3.5) (Cholestenol delta-isomerase) (Delta8-delta7 sterol isomerase) (D8-D7 sterol isomerase) (Emopamil-binding protein).	chrX 48265200
NM_006582	NM_006582	Glucocorticoid modulatory element-binding protein 1 (GMEB-1) (Parvovirus initiation factor p96) (PIF p96) (DNA-binding protein p96PIF).	chr1 28867830
NM_006582	NM_024482	Glucocorticoid modulatory element binding protein 1.	chr1 28867830
NM_006591	BC108909	DNA polymerase delta subunit 3 (DNA polymerase delta subunit p66).	chr11 73981297
NM_006591	BC108909	Hypothetical protein.	chr11 73981297
NM_006591	NM_006591	DNA polymerase delta subunit 3 (DNA polymerase delta subunit p66).	chr11 73981276
NM_006593	NM_006593	T-brain-1 protein (T-box brain protein 1) (TBR-1) (TES-56).	chr2 161980865
NM_006594	AK093740	Adaptor-related protein complex 4, beta 1 subunit.	chr1 114239208
NM_006594	NM_006594	Adapter-related protein complex 4 beta 1 subunit (Beta subunit of AP- 4) (AP-4 adapter complex beta subunit).	chr1 114239200
NM_006606	NM_006606	Retinoblastoma-binding protein 9 (RBBP-9) (Retinoblastoma-binding protein 10) (RBBP-10) (B5T overexpressed gene protein) (Bog protein).	chr20 18415189
NM_006634	NM_006634	Vesicle-associated membrane protein 5 (VAMP-5) (Myobrevin).	chr2 85665041
NM_006638	BC017871	Ribonuclease P protein subunit p40 (EC 3.1.26.5) (RNaseP protein p40) (RNase P subunit 1).	chr6 4940279
NM_006638	NM_006638	Ribonuclease P protein subunit p40 (EC 3.1.26.5) (RNaseP protein p40) (RNase P subunit 1).	chr6 4940279
NM_006639	NM_006639	Cysteinyl leukotriene receptor 1 (CysLTR1) (Cysteinyl leukotriene D4 receptor) (LTD4 receptor) (HG55) (HMTMF81).	chrX 77414786
NM_006686	NM_006686	Actin-like protein 7B (Actin-like-7-beta) (Actin-like 7B).	chr9 110656691
NM_006687	NM_006687	Actin-like protein 7A (Actin-like-7-alpha) (Actin-like 7A).	chr9 110664423
NM_006699	NM_006699	Mannosyl-oligosaccharide 1,2-alpha-mannosidase IB (EC 3.2.1.113) (Processing alpha-1,2-mannosidase IB) (Alpha-1,2-mannosidase IB) (Mannosidase alpha class 1A member 2).	chr1 117711607
NM_006731	NM_006731	Fukutin (EC 2.-.-.-) (Fukuyama-type congenital muscular dystrophy protein).	chr9 107360244
NM_006732	BC036724	FOSB protein.	chr19 50663113
NM_006732	NM_006732	Protein fosB (G0/G1 switch regulatory protein 3).	chr19 50663092
NM_006735	NM_006735	Homeobox protein Hox-A2.	chr7 27106498
NM_006739	NM_006739	DNA replication licensing factor MCM5 (CDC46 homolog) (P1-CDC46).	chr22 34126127
NM_006750	NM_006750	Beta-2-syntrophin (59 kDa dystrophin-associated protein A1, basic component 2) (Syntrophin 3) (SNT3) (Syntrophin-like) (SNTL).	chr16 67778550
NM_006753	NM_006753	Surfeit locus protein 6.	chr9 135187373
NM_006756	NM_006756	Transcription elongation factor A protein 1 (Transcription elongation factor S-II protein 1) (Transcription elongation factor TFIIS.o).	chr8 55041669
NM_006756	NM_201437	n/a	chr8 55041669
NM_006760	NM_006760	Uroplakin-2 precursor (UP 2) (Uroplakin II) (UPII).	chr11 118332235
NM_006771	NM_006771	Keratin, type I cuticular Ha8 (Hair keratin, type I Ha8).	chr17 36846146
NM_006783	NM_006783	Gap junction beta-6 protein (Connexin-30) (Cx30).	chr13 19694101
NM_006791	NM_006791	FWP006.	chr15 76952226
NM_006791	NM_206839	Mortality factor 4-like protein 1 (MORF-related gene 15 protein) (Transcription factor-like protein MRG15) (MSL3-1 protein).	chr15 76952226
NM_006799	NM_006799	Testisin precursor (EC 3.4.21.-) (Eosinophil serine protease 1) (ESP- 1).	chr16 2807164
NM_006799	NM_144956	Testisin precursor (EC 3.4.21.-) (Eosinophil serine protease 1) (ESP- 1).	chr16 2807164
NM_006799	NM_144957	n/a	chr16 2807164
NM_006802	NM_006802	Splicing factor 3A subunit 3 (Spliceosome associated protein 61) (SAP 61) (SF3a60).	chr1 38195240
NM_006807	NM_006807	Chromobox protein homolog 1 (Heterochromatin protein 1 homolog beta) (HP1 beta) (Modifier 1 protein) (M31) (Heterochromatin protein p25) (HP1Hsbeta) (p25beta).	chr17 43502421
NM_006816	NM_006816	Vesicular integral-membrane protein VIP36 precursor (GP36b glycoprotein) (Lectin, mannose-binding 2).	chr5 176691356
NM_006824	NM_006824	Probable rRNA-processing protein EBP2 (EBNA1 binding protein 2) (Nucleolar protein p40).	chr1 43402442
NM_006890	NM_006890	Carcinoembryonic antigen-related cell adhesion molecule 7 precursor (Carcinoembryonic antigen CGM2).	chr19 46869074
NM_006892	DQ321787	n/a	chr20 30813851
NM_006892	NM_006892	DNA (cytosine-5)-methyltransferase 3B (EC 2.1.1.37) (Dnmt3b) (DNA methyltransferase HsaIIIB) (DNA MTase HsaIIIB) (M.HsaIIIB).	chr20 30813851
NM_006892	NM_175848	n/a	chr20 30813851
NM_006892	NM_175849	n/a	chr20 30813851
NM_006896	NM_006896	Homeobox protein Hox-A7 (Hox-1A) (Hox 1.1).	chr7 27159864
NM_006897	NM_006897	Homeobox protein Hox-C9 (Hox-3B).	chr12 52680143
NM_006914	NM_006914	Nuclear receptor ROR-beta (Nuclear receptor RZR-beta).	chr9 76302071
NM_006923	NM_006923	Stromal cell-derived factor 2 precursor (SDF-2).	chr17 23999734
NM_006942	NM_006942	SOX-15 protein (SOX-20 protein) (SOX-12 protein).	chr17 7432221
NM_006946	NM_006946	Spectrin beta chain, brain 2 (Spectrin, non-erythroid beta chain 2) (Beta-III spectrin).	chr11 66209298
NM_006951	NM_006951	Transcription initiation factor TFIID subunit 5 (Transcription initiation factor TFIID 100 kDa subunit) (TAF(II)100) (TAFII-100) (TAFII100).	chr10 105117713
NM_006953	BC108900	Hypothetical protein.	chr22 44059535
NM_006953	NM_006953	Uroplakin-3A precursor (Uroplakin III) (UPIII).	chr22 44059552
NM_006963	NM_006963	Zinc finger protein 22 (Zinc finger protein KOX15) (Krox-26 protein).	chr10 44815927
NM_007010	NM_007010	Probable ATP-dependent RNA helicase DDX52 (EC 3.6.1.-) (DEAD box protein 52) (ATP-dependent RNA helicase ROK1-like).	chr17 33046525
NM_007010	NM_152300	Probable ATP-dependent RNA helicase DDX52 (EC 3.6.1.-) (DEAD box protein 52) (ATP-dependent RNA helicase ROK1-like).	chr17 33046525
NM_007013	NM_007013	NEDD4-like E3 ubiquitin-protein ligase WWP1 (EC 6.3.2.-) (WW domain- containing protein 1) (Atropin-1 interacting protein 5) (AIP5).	chr8 87424109
NM_007039	NM_007039	Tyrosine-protein phosphatase non-receptor type 21 (EC 3.1.3.48) (Protein-tyrosine phosphatase D1).	chr14 88003869
NM_007111	NM_007111	Transcription factor Dp-1 (E2F dimerization partner 1) (DRTF1- polypeptide-1) (DRTF1).	chr13 113287056
NM_007121	NM_007121	Oxysterols receptor LXR-beta (Liver X receptor beta) (Nuclear orphan receptor LXR-beta) (Ubiquitously-expressed nuclear receptor) (Nuclear receptor NER).	chr19 55571514
NM_007122	NM_007122	Upstream stimulatory factor 1 (Major late transcription factor 1).	chr1 159275665
NM_007122	NM_207005	Upstream stimulatory factor 1 BD.	chr1 159275665
NM_007126	NM_007126	Transitional endoplasmic reticulum ATPase (TER ATPase) (15S Mg(2+)- ATPase p97 subunit) (Valosin-containing protein) (VCP).	chr9 35046560
NM_007127	BC017303	VIL1 protein.	chr2 218996731
NM_007127	NM_007127	Villin-1.	chr2 218996723
NM_007129	NM_007129	Zinc finger protein ZIC 2 (Zinc finger protein of the cerebellum 2).	chr13 99432319
NM_007145	NM_007145	Zinc finger protein OZF (Only zinc finger protein) (Zinc finger protein 146).	chr19 41411487
NM_007165	NM_007165	Splicing factor 3A subunit 2 (Spliceosome associated protein 62) (SAP 62) (SF3a66).	chr19 2187815
NM_007172	NM_007172	Nucleoporin 50 kDa (Nuclear pore-associated protein 60 kDa-like).	chr22 43938389
NM_007183	NM_007183	Plakophilin-3.	chr11 384216
NM_007207	NM_007207	Dual specificity protein phosphatase 10 (EC 3.1.3.48) (EC 3.1.3.16) (Mitogen-activated protein kinase phosphatase 5) (MAP kinase phosphatase 5) (MKP-5).	chr1 219941388
NM_007207	NM_144728	Hypothetical protein FLJ12451 (Dual specificity phosphatase 10, isoform b).	chr1 219941388
NM_007214	NM_007214	Translocation protein SEC63 homolog.	chr6 108298215
NM_007231	NM_007231	Sodium- and chloride-dependent neutral and basic amino acid transporter B(0+) (Amino acid transporter ATB0+) (Solute carrier family 6 member 14).	chrX 115481817
NM_007249	NM_007249	Krueppel-like factor 12 (Transcriptional repressor AP-2rep).	chr13 73158150
NM_007259	NM_007259	Vacuolar protein sorting-associated protein 45 (h-VPS45) (hlVps45).	chr1 148306486
NM_007263	CR594651	COPE protein.	chr19 18871372
NM_007263	NM_007263	Coatomer epsilon subunit (Epsilon-coat protein) (Epsilon-COP).	chr19 18871323
NM_007270	NM_007270	FK506-binding protein 9 precursor (EC 5.2.1.8) (Peptidyl-prolyl cis- trans isomerase) (PPIase) (Rotamase).	chr7 32963576
NM_007278	NM_007278	Gamma-aminobutyric acid receptor associated protein (GABA(A) receptor- associated protein) (MM46).	chr17 7084462
NM_007282	NM_007282	RING finger protein 13.	chr3 151013193
NM_007315	NM_007315	Signal transducer and activator of transcription 1-alpha/beta (Transcription factor ISGF-3 components p91/p84).	chr2 191542121
NM_007362	NM_007362	Nuclear cap binding protein subunit 2 (20 kDa nuclear cap binding protein) (NCBP 20 kDa subunit) (CBP20) (NCBP interacting protein 1) (NIP1).	chr3 198146675
NM_007367	NM_007367	OTTHUMP00000030678 (Fragment).	chr20 32045392
NM_007367	NM_016732	RNA-binding protein Raly (hnRNP associated with lethal yellow homolog) (Autoantigen p542).	chr20 32045392
NM_007374	NM_007374	Homeobox protein SIX6 (Sine oculis homeobox homolog 6) (Optic homeobox 2) (Homeodomain protein OPTX2).	chr14 60045774
NM_007375	NM_007375	TAR DNA-binding protein 43 (TDP-43).	chr1 10995265
NM_012064	NM_012064	Lens fiber major intrinsic protein (Aquaporin-0) (MIP26) (MP26).	chr12 55130151
NM_012068	NM_012068	Cyclic AMP-dependent transcription factor ATF-5 (Activating transcription factor 5) (Transcription factor ATFx).	chr19 55124271
NM_012079	NM_012079	Diacylglycerol O-acyltransferase 1 (EC 2.3.1.20) (Diglyceride acyltransferase) (ACAT-related gene product 1).	chr8 145510762
NM_012079	NM_012079	Diacylglycerol O-acyltransferase 1 (EC 2.3.1.20) (Diglyceride acyltransferase) (ACAT-related gene product 1).	chr8_random 408787
NM_012082	BC109222	n/a	chr8 106400322
NM_012082	NM_012082	Zinc finger protein ZFPM2 (Zinc finger protein multitype 2) (Friend of GATA protein 2) (FOG-2) (hFOG-2).	chr8 106400322
NM_012117	NM_012117	Chromobox protein homolog 5 (Heterochromatin protein 1 homolog alpha) (HP1 alpha) (Antigen p25).	chr12 52921677
NM_012121	NM_012121	Cdc42 effector protein 4 (Binder of Rho GTPases 4).	chr17 68791358
NM_012129	NM_012129	Claudin-12.	chr7 89870731
NM_012158	NM_012158	F-box/LRR-repeat protein 3 (F-box/LRR-repeat protein 3A) (F-box and leucine-rich repeat protein 3A).	chr13 76477396
NM_012180	NM_012180	F-box only protein 8 (F-box/SEC7 protein FBS).	chr4 175394384
NM_012182	NM_012182	Forkhead box protein B1 (Transcription factor FKH-5).	chr15 58084426
NM_012184	NM_012184	Forkhead box protein D4-like 1.	chr2 113973130
NM_012186	NM_012186	Forkhead box protein E3 (Forkhead-related protein FKHL12) (Forkhead- related transcription factor 8) (FREAC-8).	chr1 47654330
NM_012200	NM_012200	Galactosylgalactosylxylosylprotein 3-beta-glucuronosyltransferase 3 (EC 2.4.1.135) (Beta-1,3-glucuronyltransferase 3) (Glucuronosyltransferase-I) (GlcAT-I) (UDP-GlcUA:Gal beta-1,3-Gal-R glucuronyltransferase) (GlcUAT-I).	chr11 62139344
NM_012202	NM_012202	Guanine nucleotide-binding protein G(I)/G(S)/G(O) gamma-3 subunit.	chr11 62231708
NM_012238	NM_012238	NAD-dependent deacetylase sirtuin-1 (EC 3.5.1.-) (hSIRT1) (hSIR2) (SIR2-like protein 1).	chr10 69314432
NM_012241	NM_012241	NAD-dependent deacetylase sirtuin-5 (EC 3.5.1.-) (SIR2-like protein 5).	chr6 13682853
NM_012255	NM_012255	5'-3' exoribonuclease 2 (EC 3.1.11.-) (DHM1-like protein) (DHP protein).	chr20 21231941
NM_012281	NM_012281	Potassium voltage-gated channel subfamily D member 2 (Voltage-gated potassium channel subunit Kv4.2).	chr7 119700957
NM_012321	NM_012321	U6 snRNA-associated Sm-like protein LSm4 (Glycine-rich protein) (GRP).	chr19 18278717
NM_012323	NM_012323	Transcription factor MafF (V-maf musculoaponeurotic fibrosarcoma oncogene homolog F) (U-Maf).	chr22 36927943
NM_012340	NM_012340	Nuclear factor of activated T-cells, cytoplasmic 2 (T cell transcription factor NFAT1) (NFAT pre-existing subunit) (NF-ATp).	chr20 49441172
NM_012340	NM_173091	Nuclear factor of activated T-cells, cytoplasmic 2 (T cell transcription factor NFAT1) (NFAT pre-existing subunit) (NF-ATp).	chr20 49441172
NM_012341	NM_012341	Nucleolar GTP-binding protein 1 (Chronic renal failure gene protein) (GTP-binding protein NGB).	chr10 1024348
NM_012381	NM_012381	Origin recognition complex subunit 3 (Origin recognition complex subunit Latheo).	chr6 88356561
NM_012381	NM_181837	Origin recognition complex subunit 3 (Origin recognition complex subunit Latheo).	chr6 88356561
NM_012431	NM_012431	Semaphorin-3E precursor.	chr7 82831157
NM_012444	NM_012444	Meiotic recombination protein SPO11.	chr20 55338237
NM_012444	NM_198265	OTTHUMP00000031362.	chr20 55338237
NM_012446	NM_012446	Single-stranded DNA-binding protein 2 (Sequence-specific single- stranded-DNA-binding protein 2).	chr5 80751428
NM_012447	NM_012447	Cohesin subunit SA-3 (Stromal antigen 3) (Stromalin 3) (SCC3 homolog 3).	chr7 99613473
NM_012452	NM_012452	Tumor necrosis factor receptor superfamily member 13B (Transmembrane activator and CAML interactor) (CD267 antigen).	chr17 16783123
NM_013230	NM_013230	Signal transducer CD24 precursor.	chrY 19611913
NM_013248	NM_013248	NTF2-related export protein 1 (p15 protein).	chr20 23279372
NM_013261	NM_013261	Peroxisome proliferator-activated receptor gamma coactivator 1-alpha (PPAR gamma coactivator 1-alpha) (PPARGC-1-alpha) (PGC-1-alpha) (Ligand effect modulator 6).	chr4 23402742
NM_013338	NM_013338	Dolichyl-phosphate beta-glucosyltransferase (EC 2.4.1.117) (DolP- glucosyltransferase).	chr13 36421966
NM_013369	NM_013369	DNA (cytosine-5)-methyltransferase 3-like.	chr21 44490650
NM_013369	NM_175867	DNA (cytosine-5)-methyltransferase 3-like.	chr21 44490650
NM_013388	NM_013388	Prolactin regulatory element-binding protein (Mammalian guanine nucleotide exchange factor mSec12).	chr2 27207130
NM_013433	NM_013433	Transportin-2 (Karyopherin beta-2b).	chr19 12671016
NM_013438	NM_013438	Ubiquilin-1 (Protein linking IAP with cytoskeleton-1) (PLIC-1) (hPLIC- 1).	chr9 85464698
NM_013444	NM_013444	Ubiquilin-2 (Protein linking IAP with cytoskeleton-2) (PLIC-2) (hPLIC- 2) (Ubiquitin-like product Chap1/Dsk2) (DSK2 homolog) (Chap1).	chrX 56606796
NM_013448	NM_013448	Bromodomain adjacent to zinc finger domain protein 1A (ATP-utilizing chromatin assembly and remodeling factor 1) (hACF1) (ATP-dependent chromatin remodelling protein) (Williams syndrome transcription factor-related chromatin remodeling factor 180) (WCRF18	chr14 34291689
NM_013448	NM_182648	Bromodomain adjacent to zinc finger domain, 1A isoform b variant (Fragment).	chr14 34291689
NM_014009	NM_014009	Forkhead box protein P3 (Scurfin).	chrX 48994353
NM_014071	NM_014071	Nuclear receptor coactivator 6 (Amplified in breast cancer-3 protein) (Cancer-amplified transcriptional coactivator ASC-2) (Activating signal cointegrator-2) (ASC-2) (Peroxisome proliferator-activated receptor-interacting protein) (PPAR-interacting protei	chr20 32766239
NM_014160	CR610136	Makorin-2 (RING finger protein 62).	chr3 12573595
NM_014160	NM_014160	Makorin-2 (RING finger protein 62).	chr3 12573593
NM_014191	NM_014191	Sodium channel protein type VIII alpha subunit (Voltage-gated sodium channel alpha subunit Nav1.6).	chr12 50271286
NM_014213	NM_014213	Homeobox protein Hox-D9 (Hox-4C) (Hox-5.2).	chr2 176695333
NM_014236	NM_014236	Dihydroxyacetone phosphate acyltransferase (EC 2.3.1.42) (DHAP-AT) (DAP-AT) (Glycerone-phosphate O-acyltransferase) (Acyl- CoA:dihydroxyacetonephosphateacyltransferase).	chr1 229443604
NM_014292	NM_014292	Chromobox protein homolog 6.	chr22 37590203
NM_014325	NM_014325	Coronin-1C (Coronin-3) (hCRNN4).	chr12 107563017
NM_014352	NM_014352	POU domain, class 2, transcription factor 3 (Octamer-binding transcription factor 11) (Oct-11) (Transcription factor Skn-1) (PLA-1 protein).	chr11 119616255
NM_014360	NM_014360	Homeobox protein Nkx-2.8 (Homeobox protein NK-2 homolog H).	chr14 36118967
NM_014368	NM_014368	LIM/homeobox protein Lhx6.1 (Lhx6).	chr9 124004680
NM_014368	NM_199160	LIM homeobox 6 (LIM homeobox protein 6, isoform 2).	chr9 124004680
NM_014371	NM_014371	A-kinase anchor protein-like protein 8 (Neighbor of A-kinase anchoring protein 95) (Homologous to AKAP95 protein) (HA95) (Helicase A-binding protein 95) (HAP95).	chr19 15351858
NM_014385	NM_014385	Sialic acid-binding Ig-like lectin 7 precursor (Siglec-7) (QA79 membrane protein) (Adhesion inhibitory recptor molecule 1) (AIRM-1) (p75) (D-siglec) (CDw328 antigen).	chr19 56337385
NM_014405	NM_014405	Voltage-dependent calcium channel gamma-4 subunit (Neuronal voltage- gated calcium channel gamma-4 subunit).	chr17 62391474
NM_014408	NM_014408	Trafficking protein particle complex subunit 3 (BET3 homolog).	chr1 36374761
NM_014462	NM_014462	U6 snRNA-associated Sm-like protein LSm1 (Small nuclear ribonuclear CaSm) (Cancer-associated Sm-like).	chr8 38140014
NM_014479	NM_014479	ADAM DEC1 precursor (EC 3.4.24.-) (A disintegrin and metalloproteinase domain-like protein decysin 1) (ADAM-like protein decysin 1).	chr8 24297915
NM_014505	NM_014505	Calcium-activated potassium channel beta subunit 4 (Calcium-activated potassium channel, subfamily M, beta subunit 4) (Maxi K channel beta subunit 4) (BK channel beta subunit 4) (Slo-beta 4) (K(VCA)beta 4) (Charybdotoxin receptor beta subunit 4) (BKbeta4)	chr12 69046328
NM_014547	NM_014547	Tropomodulin-3 (Ubiquitous tropomodulin) (U-Tmod).	chr15 49909180
NM_014548	BC036184	Tropomodulin-2 (Neuronal tropomodulin) (N-Tmod).	chr15 49831085
NM_014548	NM_014548	Tropomodulin-2 (Neuronal tropomodulin) (N-Tmod).	chr15 49831101
NM_014562	NM_014562	Homeobox protein OTX1.	chr2 63131468
NM_014564	NM_014564	LIM homeobox 3.	chr9 138227918
NM_014564	NM_178138	LIM/homeobox protein Lhx3.	chr9 138227918
NM_014569	NM_014569	Zinc finger protein 95 homolog (Zfp-95).	chr7 98940539
NM_014587	NM_014587	Transcription factor SOX-8.	chr16 971808
NM_014588	NM_014588	Visual system homeobox 1 (Transcription factor VSX1) (Retinal inner nuclear layer homeobox protein) (Homeodomain protein RINX).	chr20 25004099
NM_014620	NM_014620	Homeobox protein Hox-C4 (Hox-3E) (CP19).	chr12 52696939
NM_014646	NM_014646	Lipin-2.	chr18 2906992
NM_014669	NM_014669	Nuclear pore complex protein Nup93 (Nucleoporin Nup93) (93 kDa nucleoporin).	chr16 55321607
NM_014673	NM_014673	Tetratricopeptide repeat protein KIAA0103.	chr8 109525028
NM_014674	NM_014674	ER degradation-enhancing alpha-mannosidase-like.	chr3 5204432
NM_014704	NM_014704	Protein KIAA0562.	chr1 3718512
NM_014739	NM_014739	Bcl-2-associated transcription factor 1 (Btf).	chr6 136621418
NM_014740	NM_014740	Probable ATP-dependent RNA helicase DDX48 (EC 3.6.1.-) (DEAD box protein 48) (Eukaryotic initiation factor 4A-like NUK-34) (Nuclear matrix protein 265) (hNMP 265) (Eukaryotic translation initiation factor 4A isoform 3).	chr17 75723613
NM_014780	NM_014780	Cullin-7 (CUL-7).	chr6 43113333
NM_014795	NM_014795	Zinc finger homeobox protein 1b (Smad interacting protein 1) (SMADIP1).	chr2 144862053
NM_014841	BC036650	SNAP91 protein.	chr6 84319335
NM_014841	CR749348	OTTHUMP00000016795 (Fragment).	chr6 84319335
NM_014841	NM_014841	Clathrin coat assembly protein AP180 (Clathrin coat-associated protein AP180) (91 kDa synaptosomal-associated protein).	chr6 84319331
NM_014872	NM_014872	Zinc finger and BTB domain-containing protein 5.	chr9 37428110
NM_014885	NM_014885	Anaphase promoting complex subunit 10 (APC10) (Cyclosome subunit 10).	chr4 146135770
NM_014932	NM_014932	Neuroligin-1 precursor.	chr3 174598937
NM_014943	NM_014943	Zinc fingers and homeoboxes protein 2 (Zinc finger and homeodomain protein 2) (Alpha-fetoprotein regulator 1) (AFP regulator 1) (Regulator of AFP).	chr8 123863081
NM_014977	NM_014977	Apoptotic chromatin condensation inducer in the nucleus (Acinus).	chr14 22597615
NM_015004	NM_015004	Exosome complex exonuclease RRP42 (EC 3.1.13.-) (Ribosomal RNA- processing protein 42) (Exosome component 7) (p8).	chr3 44992767
NM_015024	NM_015024	Exportin-7 (Ran-binding protein 16).	chr8 21833127
NM_015051	NM_015051	Thioredoxin domain-containing protein 4 precursor (Endoplasmic reticulum resident protein ERp44).	chr9 101781285
NM_015100	AB037911	Hypothetical protein Nbla00003 (Fragment).	chr1 149641827
NM_015100	BX537561	Pogo transposable element with ZNF domain.	chr1 149641824
NM_015100	NM_015100	Pogo transposable element with ZNF domain (Nbla00003).	chr1 149641823
NM_015100	NM_207171	Pogo transposable element with ZNF domain (Fragment).	chr1 149641823
NM_015169	NM_015169	Ribosome biogenesis regulatory protein homolog.	chr8 67503816
NM_015231	AL832029	Nuclear pore complex protein Nup160 (Nucleoporin Nup160) (160 kDa nucleoporin).	chr11 47756247
NM_015231	NM_015231	Nuclear pore complex protein Nup160 (Nucleoporin Nup160) (160 kDa nucleoporin).	chr11 47756247
NM_015260	AB014600	n/a	chr19 16801210
NM_015260	NM_015260	Paired amphipathic helix protein Sin3b (Transcriptional corepressor Sin3b) (Histone deacetylase complex subunit Sin3b).	chr19 16801217
NM_015265	NM_015265	DNA-binding protein SATB2 (Special AT-rich sequence-binding protein 2).	chr2 199842468
NM_015271	NM_015271	Tripartite motif protein 2 (RING finger protein 86).	chr4 154345067
NM_015339	NM_015339	Activity-dependent neuroprotector (Activity-dependent neuroprotective protein).	chr20 48940289
NM_015352	NM_015352	GDP-fucose protein O-fucosyltransferase 1 precursor (EC 2.4.1.221) (Peptide-O-fucosyltransferase) (O-FucT-1).	chr20 30259356
NM_015352	NM_172236	OTTHUMP00000030584.	chr20 30259356
NM_015438	BC010431	Hypothetical protein HOM-TES-103 (Intermediate filament-like protein MGC:2625, isoform 3).	chr12 6518966
NM_015438	CR616146	Hypothetical protein HOM-TES-103 (Intermediate filament-like protein MGC:2625, isoform 3).	chr12 6519003
NM_015438	NM_015438	Intermediate filament-like protein MGC:2625, isoform 1.	chr12 6518966
NM_015438	NM_080730	Hypothetical protein FLJ20703.	chr12 6518966
NM_015438	NM_080731	Hypothetical protein FLJ20703.	chr12 6518966
NM_015477	NM_015477	Paired amphipathic helix protein Sin3a (Transcriptional corepressor Sin3a) (Histone deacetylase complex subunit Sin3a).	chr15 73450329
NM_015515	AL117538	Hypothetical protein DKFZp434G032.	chr17 36332477
NM_015515	NM_015515	Keratin, type I cytoskeletal 23 (Cytokeratin-23) (CK-23) (Keratin-23) (K23).	chr17 36332477
NM_015568	NM_015568	Protein phosphatase 1 regulatory inhibitor subunit 16B (TGF-beta- inhibited membrane-associated protein) (hTIMAP) (CAAX box protein TIMAP) (Ankyrin repeat domain protein 4).	chr20 36867761
NM_015613	NM_015613	Leucine-rich repeat-containing protein 21 precursor (Photoreceptor- associated LRR superfamily protein) (Retina-specific protein PAL).	chr10 85981457
NM_015995	NM_015995	Krueppel-like factor 13 (Transcription factor BTEB3) (Basic transcription element binding protein 3) (BTE-binding protein 3) (RANTES factor of late activated T lymphocytes 1) (RFLAT-1) (Transcription factor NSLP1) (Novel Sp1-like zinc finger transcription	chr15 29406374
NM_016128	NM_016128	Coatomer gamma subunit (Gamma-coat protein) (Gamma-COP).	chr3 130451142
NM_016166	NM_016166	Protein inhibitor of activated STAT protein 1 (Gu-binding protein) (GBP) (RNA helicase II-binding protein) (DEAD/H box-binding protein 1).	chr15 66133625
NM_016170	NM_016170	T-cell leukemia homeobox protein 2 (Homeobox protein Hox-11L1) (Neural crest homeobox protein).	chr2 74595118
NM_016188	NM_016188	Actin-like protein 6B (53 kDa BRG1-associated factor B) (Actin-related protein Baf53b) (ArpNalpha).	chr7 100078663
NM_016270	NM_016270	Kruppel-like factor 2 (Lung kruppel-like factor).	chr19 16296650
NM_016306	NM_016306	DnaJ homolog subfamily B member 11 precursor (ER-associated dnaJ protein 3) (ErJ3) (ER-associated Hsp40 co-chaperone) (hDj9) (PWP1- interacting protein 4).	chr3 187771160
NM_016307	NM_016307	Paired mesoderm homeobox protein 2 (PRX-2) (Paired related homeobox protein 2).	chr9 131467740
NM_016310	NM_016310	DNA-directed RNA polymerases III 12.5 kDa polypeptide (EC 2.7.7.6) (RNA polymerase III C11 subunit) (HsC11p) (hRPC11).	chr16 36999
NM_016358	NM_016358	Iroquois-class homeodomain protein IRX-4 (Iroquois homeobox protein 4) (Homeodomain protein IRXA3).	chr5 1930548
NM_016445	NM_016445	Pleckstrin-2.	chr14 66923452
NM_016451	NM_016451	Coatomer beta subunit (Beta-coat protein) (Beta-COP).	chr11 14435628
NM_016518	NM_016518	Peroxisomal sarcosine oxidase (EC 1.5.3.1) (PSO) (L-pipecolate oxidase) (EC 1.5.3.7) (L-pipecolic acid oxidase).	chr17 24394043
NM_016531	NM_016531	Kruppel-like factor 3 (Basic kruppel-like factor) (CACCC-box binding protein BKLF) (TEF-2).	chr4 38342217
NM_016541	NM_016541	Guanine nucleotide-binding protein G(I)/G(S)/G(O) gamma-13 subunit.	chr16 788044
NM_016580	NM_016580	Protocadherin 12 precursor (Vascular cadherin-2) (Vascular endothelial cadherin-2) (VE-cadherin-2) (VE-cad-2).	chr5 141304714
NM_016593	NM_016593	Cytochrome P450 39A1 (EC 1.14.13.-) (Oxysterol 7-alpha-hydroxylase) (hCYP39A1).	chr6 46625404
NM_016615	NM_016615	Sodium- and chloride-dependent GABA transporter 2.	chr12 200051
NM_016932	CR595397	Homeobox protein SIX2 (Sine oculis homeobox homolog 2).	chr2 45085858
NM_016932	NM_016932	Homeobox protein SIX2 (Sine oculis homeobox homolog 2).	chr2 45085851
NM_016937	NM_016937	DNA polymerase alpha catalytic subunit (EC 2.7.7.7).	chrX 24621984
NM_016938	NM_016938	EGF-containing fibulin-like extracellular matrix protein 2 precursor (Fibulin-4) (FIBL-4) (UPH1 protein).	chr11 65390494
NM_016941	NM_016941	Delta-like protein 3 precursor (Drosophila Delta homolog 3).	chr19 44681426
NM_016941	NM_203486	CDNA FLJ90821 fis, clone Y79AA1001328, highly similar to Delta-like protein 3.	chr19 44681426
NM_017409	NM_017409	Homeobox protein Hox-C10.	chr12 52665212
NM_017412	NM_017412	Frizzled 3 precursor (Frizzled-3) (Fz-3) (hFz3).	chr8 28407691
NM_017420	NM_017420	Homeobox protein SIX4 (Sine oculis homeobox homolog 4).	chr14 60246010
NM_017437	NM_017437	Cleavage and polyadenylation specificity factor, 100 kDa subunit (CPSF 100 kDa subunit).	chr14 91658081
NM_017443	NM_017443	DNA polymerase epsilon subunit 3 (EC 2.7.7.7) (DNA polymerase II subunit 3) (DNA polymerase epsilon subunit p17) (Chromatin accessibility complex 17) (HuCHRAC17) (CHRAC-17) (Arsenic- transactivated protein) (AsTP).	chr9 115209341
NM_017444	NM_017444	Chromatin accessibility complex protein 1 (CHRAC-1) (CHRAC-15) (HuCHRAC15) (DNA polymerase epsilon subunit p15).	chr8 141590585
NM_017520	BC003542	Hypothetical protein FLJ32223.	chr13 19105879
NM_017520	NM_017520	M-phase phosphoprotein 8.	chr13 19105879
NM_017545	NM_017545	Hydroxyacid oxidase 1 (EC 1.1.3.15) (HAOX1) (Glycolate oxidase) (GOX).	chr20 7811630
NM_017588	NM_017588	WD-repeat protein 5 (BMP2-induced 3-kb gene protein).	chr9 135991030
NM_017883	NM_017883	WD-repeat protein 13.	chrX 48340844
NM_017929	NM_017929	Peroxisome assembly protein 26 (Peroxin-26).	chr22 16940688
NM_017946	NM_017946	FK506-binding protein 14 precursor (EC 5.2.1.8) (Peptidyl-prolyl cis- trans isomerase) (PPIase) (Rotamase) (22 kDa FK506-binding protein) (FKBP-22).	chr7 30019408
NM_018057	NM_018057	Hypothetical protein FLJ12791.	chr12 83798761
NM_018062	BC037570	Ubiquitin ligase protein FANCL (EC 6.3.2.-) (Fanconi anemia group L protein) (Fanconi anemia-associated polypeptide of 43 kDa) (FAAP43).	chr2 58239885
NM_018062	NM_018062	Ubiquitin ligase protein FANCL (EC 6.3.2.-) (Fanconi anemia group L protein) (Fanconi anemia-associated polypeptide of 43 kDa) (FAAP43).	chr2 58239883
NM_018082	NM_018082	DNA-directed RNA polymerase III subunit 127.6 kDa polypeptide (EC 2.7.7.6) (RNA polymerase III subunit 2) (RPC2).	chr12 105275618
NM_018256	NM_018256	WD-repeat protein 12 (YTM1 homolog).	chr2 203453574
NM_018416	NM_018416	Forkhead box protein J2 (Fork head homologous X).	chr12 8076625
NM_018488	NM_018488	T-box transcription factor TBX4 (T-box protein 4).	chr17 56888588
NM_018683	NM_018683	Zinc finger protein 313 (RING finger protein 114).	chr20 47986320
NM_018696	NM_018696	Zinc phosphodiesterase ELAC protein 1 (EC 3.1.26.11) (Ribonuclease Z 1) (RNase Z 1) (tRNase Z 1) (tRNA 3 endonuclease 1) (ElaC homolog protein 1) (Deleted in Ma29).	chr18 46748384
NM_018697	NM_018697	LanC-like protein 2 (Testis-specific adriamycin sensitivity protein).	chr7 55400634
NM_018714	NM_018714	Conserved oligomeric Golgi complex component 1.	chr17 68700767
NM_018941	NM_018941	Protein CLN8.	chr8 1699347
NM_018943	NM_018943	Tubulin alpha-8 chain (Alpha-tubulin 8).	chr22 16973558
NM_018951	NM_018951	Homeobox protein Hox-A10 (Hox-1H) (Hox-1.8) (PL).	chr7 27176735
NM_018951	NM_153715	HOXA10 protein.	chr7 27176735
NM_018952	NM_018952	Homeobox protein Hox-B6 (Hox-2B) (Hox-2.2) (HU-2).	chr17 44028097
NM_018953	NM_018953	Homeobox protein Hox-C5 (Hox-3D) (CP11).	chr12 52713098
NM_019082	NM_019082	Probable ATP-dependent RNA helicase DDX56 (EC 3.6.1.-) (DEAD box protein 56) (ATP-dependent 61 kDa nucleolar RNA helicase) (DEAD-box protein 21).	chr7 44571928
NM_019102	NM_019102	Homeobox protein Hox-A5 (Hox-1C).	chr7 27147520
NM_019852	CR594281	n/a	chr14 21036156
NM_019852	NM_019852	N6-adenosine-methyltransferase 70 kDa subunit (EC 2.1.1.62) (MT-A70) (Methyltransferase-like protein 3).	chr14 21036128
NM_019892	NM_019892	72 kDa inositol polyphosphate 5-phosphatase (EC 3.1.3.36) (Phosphatidylinositol-4,5-bisphosphate 5-phosphatase) (Phosphatidylinositol polyphosphate 5-phosphatase type IV).	chr9 138442892
NM_019896	NM_019896	DNA polymerase epsilon subunit 4 (EC 2.7.7.7) (DNA polymerase II subunit 4) (DNA polymerase epsilon subunit p12).	chr2 75039282
NM_020056	NM_020056	HLA class II histocompatibility antigen, DQ(6) alpha chain precursor (DX alpha chain) (HLA-DQA1).	chr6 32817140
NM_020056	NM_020056	HLA class II histocompatibility antigen, DQ(6) alpha chain precursor (DX alpha chain) (HLA-DQA1).	chr6_cox_hap1 4091390
NM_020064	NM_020064	BarH-like 1 homeobox protein.	chr9 134447813
NM_020134	NM_020134	Dihydropyrimidinase-related protein 5 (DRP-5) (ULIP6 protein) (Collapsin response mediator protein 5) (CRMP-5) (CRMP3-associated molecule) (CRAM).	chr2 26924466
NM_020165	NM_020165	Postreplication repair protein RAD18 (hRAD18) (hHR18) (RING finger protein 73).	chr3 8896560
NM_020193	BC033404	C11orf30 protein.	chr11 75833716
NM_020193	NM_020193	Protein EMSY.	chr11 75833716
NM_020310	NM_020310	MAX binding protein MNT (ROX protein) (MYC antagonist MNT).	chr17 2234104
NM_020384	NM_020384	Claudin-2 (SP82).	chrX 106050289
NM_020457	NM_020457	THAP domain-containing protein 11.	chr16 66433713
NM_020474	NM_020474	Polypeptide N-acetylgalactosaminyltransferase 1 (EC 2.4.1.41) (Protein-UDP acetylgalactosaminyltransferase 1) (UDP- GalNAc:polypeptide N-acetylgalactosaminyltransferase 1) (Polypeptide GalNAc transferase 1) (GalNAc-T1) (pp-GaNTase 1) [Contains: Polypeptid	chr18 31488593
NM_020644	BC040124	TMEM9B protein.	chr11 8925416
NM_020644	NM_020644	Protein C11orf15 precursor.	chr11 8925415
NM_020647	NM_020647	Junctophilin-1 (Junctophilin type 1) (JP-1).	chr8 75309494
NM_020649	NM_020649	Chromobox protein homolog 8 (Polycomb 3 homolog) (Pc3) (HPC3) (Rectachrome 1).	chr17 75382770
NM_020650	NM_020650	Reticulocalbin-3 precursor (EF-hand calcium-binding protein RLP49).	chr19 54722686
NM_020653	NM_020653	Zinc finger protein 287.	chr17 16395434
NM_020655	NM_020655	Junctophilin-3 (Junctophilin type 3) (JP-3).	chr16 86193999
NM_020697	NM_020697	Potassium voltage-gated channel subfamily S member 2 (Voltage-gated potassium channel subunit Kv9.2) (Delayed-rectifier K(+) channel alpha subunit 2).	chr8 99508425
NM_020744	NM_020744	Metastasis-associated protein MTA3.	chr2 42649174
NM_020783	NM_020783	Synaptotagmin-4 (Synaptotagmin IV) (SytIV).	chr18 39101854
NM_020807	NM_020807	Zinc finger protein 319.	chr16 56586073
NM_020831	NM_020831	MKL/myocardin-like protein 1 (Myocardin-related transcription factor A) (MRTF-A) (Megakaryoblastic leukemia 1 protein) (Megacaryocytic acute leukemia protein).	chr22 39136237
NM_020866	NM_020866	Kelch-like protein 1.	chr13 69172726
NM_020924	NM_020924	Zinc finger and BTB domain-containing protein 26 (Zinc finger protein 481) (Zinc finger protein Bioref).	chr9 124720199
NM_020967	BC056872	NCOA5 protein.	chr20 44123043
NM_020967	NM_020967	Nuclear receptor coactivator 5 (NCoA-5) (Coactivator independent of AF-2) (CIA).	chr20 44123034
NM_020980	NM_020980	Aquaporin-9 (AQP-9) (Small solute channel 1).	chr15 56217770
NM_020999	NM_020999	Neurogenin 3.	chr10 71001797
NM_021025	NM_021025	T-cell leukemia homeobox protein 3 (Homeobox protein Hox-11L2).	chr5 170668892
NM_021101	NM_021101	Claudin-1 (Senescence-associated epithelial membrane protein).	chr3 191506196
NM_021149	AK127352	Hypothetical protein FLJ45426 (Hypothetical protein FLJ43657).	chr16 83156708
NM_021149	NM_021149	Coactosin-like protein.	chr16 83156706
NM_021195	NM_021195	Claudin-6 (Skullin 2).	chr16 3004714
NM_021203	NM_021203	Signal recognition particle receptor beta subunit (SR-beta) (Protein APMCF1).	chr3 135007366
NM_021223	NM_021223	Myosin regulatory light chain 2, atrial isoform (Myosin light chain 2a) (MLC-2a) (MLC2a) (Myosin regulatory light chain 7).	chr7 44144989
NM_021235	NM_021235	Epidermal growth factor receptor substrate 15-like 1 (Eps15-related protein) (Eps15R).	chr19 16333407
NM_021259	NM_021259	Transmembrane protein 8 precursor (M83 protein).	chr16 361860
NM_021627	NM_021627	Sentrin-specific protease 2 (EC 3.4.22.-) (Sentrin/SUMO-specific protease SENP2) (SMT3-specific isopeptidase 2) (Smt3ip2) (Axam2).	chr3 186786724
NM_021629	NM_021629	Guanine nucleotide-binding protein beta subunit 4 (Transducin beta chain 4).	chr3 180599695
NM_021728	NM_021728	Homeobox protein OTX2.	chr14 56337179
NM_021728	NM_172337	Homeobox protein OTX2.	chr14 56337179
NM_021784	NM_021784	Hepatocyte nuclear factor 3-beta (HNF-3B) (Forkhead box protein A2).	chr20 22509822
NM_021813	NM_021813	Transcription regulator protein BACH2 (BTB and CNC homolog 2).	chr6 90692968
NM_021822	NM_021822	DNA dC->dU editing enzyme APOBEC-3G (EC 3.5.4.-) (APOBEC-related cytidine deaminase) (ARCD) (APOBEC-related protein) (ARP-9) (CEM15) (CEM-15).	chr22 37803081
NM_021920	NM_021920	Secretin precursor.	chr11 616312
NM_021926	NM_021926	Homeobox protein aristaless-like 4.	chr11 44242734
NM_021961	NM_021961	Transcriptional enhancer factor TEF-1 (TEA domain family member 1) (TEAD-1) (Protein GT-IIC) (Transcription factor 13) (NTEF-1).	chr11 12742300
NM_021966	NM_021966	T-cell leukemia/lymphoma protein 1A (P14 TCL1 protein) (TCL1 oncogene) (TCL-1 protein).	chr14 95246057
NM_021969	NM_021969	Nuclear receptor 0B2 (Orphan nuclear receptor SHP) (Small heterodimer partner).	chr1 27110565
NM_021973	NM_021973	Heart- and neural crest derivatives-expressed protein 2 (Deciduum, heart, autonomic nervous system and neural crest derivatives-expressed protein 2) (dHAND).	chr4 174682694
NM_021974	NM_021974	DNA-directed RNA polymerases I, II, and III 14.4 kDa polypeptide (EC 2.7.7.6) (RPB6) (RPABC14.4) (RPB14.4) (RPABC2).	chr22 36679663
NM_022073	NM_022073	Egl nine homolog 3 (EC 1.14.11.-) (Hypoxia-inducible factor prolyl hydroxylase 3) (HIF-prolyl hydroxylase 3) (HIF-PH3) (HPH-1) (Prolyl hydroxylase domain-containing protein 3) (PHD3).	chr14 33463173
NM_022080	AK124876	Beta-soluble NSF attachment protein (SNAP-beta) (N-ethylmaleimide- sensitive factor attachment protein, beta).	chr20 23303163
NM_022080	BC047426	NAPB protein.	chr20 23303162
NM_022080	NM_022080	Beta-soluble NSF attachment protein (SNAP-beta) (N-ethylmaleimide- sensitive factor attachment protein, beta).	chr20 23303165
NM_022141	NM_022141	Gamma-parvin.	chr22 42908189
NM_022363	NM_022363	LIM/homeobox protein Lhx5.	chr12 112385076
NM_022365	BC110894	Hypothetical protein FLJ22409.	chr10 22085483
NM_022365	CR613772	DnaJ (Hsp40) homolog, subfamily C, member 1 (DNAJC1)(DNAJL1).	chr10 22085508
NM_022365	NM_022365	DnaJ homolog subfamily C member 1.	chr10 22085512
NM_022454	NM_022454	Transcription factor SOX-17.	chr8 55533047
NM_022658	NM_022658	Homeobox protein Hox-C8 (Hox-3A).	chr12 52689156
NM_022719	NM_022719	DGCR14 protein (DiGeorge syndrome critical region 14) (ES2 protein).	chr22 17501451
NM_022726	NM_022726	Elongation of very long chain fatty acids protein 4.	chr6 80681254
NM_022728	NM_022728	Neurogenic differentiation factor 6 (NeuroD6).	chr7 31343606
NM_022761	NM_022761	Protein C11orf1.	chr11 111255474
NM_023039	NM_023039	Ankyrin repeat family A protein 2 (RFXANK-like 2).	chr5 72883918
NM_023067	NM_023067	Forkhead box protein L2.	chr3 140145756
NM_024014	NM_024014	Homeobox protein Hox-A6 (Hox-1B).	chr7 27151640
NM_024015	NM_024015	Homeobox protein Hox-B4 (Hox-2F) (Hox-2.6).	chr17 44007868
NM_024016	NM_024016	Homeobox protein Hox-B8 (Hox-2D) (Hox-2.4).	chr17 44044707
NM_024017	NM_024017	Homeobox protein Hox-B9 (Hox-2E) (Hox-2.5).	chr17 44053524
NM_024027	NM_024027	Collectin sub-family member 11, isoform a (RGNL596) (Hypothetical protein COLEC11).	chr2 3620511
NM_024027	NM_199235	Collectin sub-family member 11, isoform b.	chr2 3620511
NM_024057	NM_024057	Nucleoporin Nup37 (p37).	chr12 100992104
NM_024081	NM_024081	Transmembrane gamma-carboxyglutamic acid protein 4 precursor (Proline- rich Gla protein 4) (Proline-rich gamma-carboxyglutamic acid protein 4).	chr11 32808064
NM_024105	NM_024105	Dolichyl-P-Man:Man(7)GlcNAc(2)-PP-dolichyl-alpha-1,6- mannosyltransferase (EC 2.4.1.-) (Mannosyltransferase ALG12 homolog) (hALG12) (Membrane protein SB87).	chr22 48682856
NM_024301	NM_024301	Fukutin-related protein (EC 2.-.-.-).	chr19 51941154
NM_024336	NM_024336	Iroquois-class homeodomain protein IRX-3 (Iroquois homeobox protein 3) (Homeodomain protein IRXB1).	chr16 52874712
NM_024337	NM_024337	Iroquois-class homeodomain protein IRX-1 (Iroquois homeobox protein 1) (Homeodomain protein IRXA1).	chr5 3649167
NM_024523	NM_024523	GRIP and coiled-coil domain-containing protein 1 (Golgi coiled coil protein 1).	chr7 127007918
NM_024775	NM_024775	Gem-associated protein 6 (Gemin-6) (SIP2).	chr2 38858830
NM_024784	NM_024784	Zinc finger and BTB domain-containing protein 3.	chr11 62275012
NM_025128	NM_025128	Crossover junction endonuclease MUS81 homolog (EC 3.1.22.4) (Holliday junction resolvase Mus81).	chr11 65384524
NM_025165	NM_025165	RNA polymerase II elongation factor ELL3.	chr15 41852089
NM_025224	NM_025224	BTB/POZ domain containing protein 4 (Zinc finger protein 340).	chr20 61846321
NM_025245	NM_025245	Pre-B-cell leukemia transcription factor 4 (Homeobox protein PBX4) (Fragment).	chr19 19533523
NM_030634	NM_030634	Zinc finger protein 436.	chr1 23559054
NM_030755	NM_030755	Thioredoxin domain-containing protein 1 precursor (Transmembrane Trx- related protein) (Thioredoxin-related transmembrane protein).	chr14 50776685
NM_030763	NM_030763	Nucleosomal binding protein 1.	chrX 80255855
NM_031286	NM_031286	SH3 domain-binding glutamic acid-rich-like protein 3 (SH3 domain- binding protein 1) (SH3BP-1).	chr1 26479030
NM_031287	NM_031287	Splicing factor 3B subunit 5 (SF3b5) (Pre-mRNA splicing factor SF3b 10 kDa subunit).	chr6 144457710
NM_031296	NM_031296	Ras-related protein Rab-33B.	chr4 140594410
NM_031309	BC093806	SCRT1 protein.	chr8 145525288
NM_031309	NM_031309	Transcriptional repressor scratch 1 (Scratch homolog 1 zinc finger protein) (Scratch 1) (SCRT) (hScrt).	chr8 145525261
NM_031309	NM_031309	Transcriptional repressor scratch 1 (Scratch homolog 1 zinc finger protein) (Scratch 1) (SCRT) (hScrt).	chr8_random 399386
NM_031439	NM_031439	Transcription factor SOX-7.	chr8 10618688
NM_031459	NM_031459	Sestrin-2 (Hi95).	chr1 28458592
NM_031469	NM_031469	SH3 domain-binding glutamic acid-rich-like protein 2 (Fovea-associated SH3 domain binding protein).	chr6 80397718
NM_031498	NM_031498	Guanine nucleotide-binding protein G(I)/G(S)/G(O) gamma-T2 subunit (G gamma-C) (G-gamma-8) (G-gamma 9).	chr17 44638595
NM_031885	NM_031885	Bardet-Biedl syndrome 2 protein.	chr16 55075798
NM_031918	NM_031918	Transcription factor BTEB4 (Basic transcription element binding- protein 4) (BTE-binding protein 4) (Krueppel-like factor 16) (Novel Sp1-like zinc finger transcription factor 2) (Transcription factor NSLP2).	chr19 1803398
NM_031966	NM_031966	G2/mitotic-specific cyclin-B1.	chr5 68498668
NM_032214	NM_032214	Src-like-adapter 2 (Src-like adapter protein 2) (SLAP-2) (Modulator of antigen receptor signaling) (MARS).	chr20 34674335
NM_032408	NM_032408	Bromodomain adjacent to zinc finger domain protein 1B (Williams-Beuren syndrome chromosome region 9 protein) (WBRS9) (Williams syndrome transcription factor) (hWALP2).	chr7 72492669
NM_032410	NM_032410	Hook homolog 3 (hHK3).	chr8 42871189
NM_032565	BC021021	OTTHUMP00000018421.	chr13 49132865
NM_032565	BC073152	Emopamil-binding protein-like (Emopamil-binding-related protein).	chr13 49132865
NM_032565	NM_032565	Emopamil-binding protein-like (Emopamil-binding-related protein).	chr13 49132863
NM_032591	NM_032591	Sodium/hydrogen exchanger 7 (Na(+)/H(+) exchanger 7) (NHE-7) (Solute carrier family 9 member 7).	chrX 46351316
NM_032603	NM_032603	Lysyl oxidase homolog 3 precursor (EC 1.4.3.-) (Lysyl oxidase-like protein 3).	chr2 74613453
NM_032737	NM_032737	Lamin B2.	chr19 2379164
NM_032758	NM_032758	PHD finger-like domain protein 5A (Splicing factor 3B associated 14 kDa protein) (SF3b14b).	chr22 40185667
NM_032905	NM_032905	Splicing factor 45 (45 kDa splicing factor) (RNA-binding motif protein 17).	chr10 6171012
NM_032940	NM_032940	DNA-directed RNA polymerase II 33 kDa polypeptide (EC 2.7.7.6) (RPB3) (RNA polymerase II subunit 3) (RPB33) (RPB31).	chr16 56054079
NM_033027	NM_033027	Axin-1 up-regulated gene 1 protein (TGF-beta-induced apoptosis protein 3) (TAIP-3) (URAX1 protein).	chr3 39158350
NM_033033	NM_033033	Keratin, type II cuticular Hb2 (Hair keratin, type II Hb2).	chr12 51074001
NM_033036	NM_033036	Galactose-3-O-sulfotransferase 3 (EC 2.8.2.-) (Gal3ST-3) (Galbeta1- 3GalNAc 3'-sulfotransferase 3) (Beta-galactose-3-O-sulfotransferase 3) (Gal3ST2).	chr11 65566028
NM_033260	NM_033260	Forkhead box protein Q1 (Hepatocyte nuclear factor 3 forkhead homolog 1) (HNF-3/forkhead-like protein 1) (HFH-1).	chr6 1257674
NM_033267	NM_033267	Iroquois-class homeodomain protein IRX-2 (Iroquois homeobox protein 2) (Homeodomain protein IRXA2).	chr5 2799879
NM_033328	NM_033328	F-actin capping protein alpha-3 subunit (CapZ alpha-3) (CP-alpha-3) (Germ cell-specific protein 3).	chr12 18782311
NM_033375	NM_033375	Myosin Ic (Myosin I beta) (MMI-beta) (MMIb).	chr17 1314874
NM_033550	NM_033550	TP53-regulating kinase (EC 2.7.1.37) (p53-related protein kinase) (Nori-2).	chr20 44746411
NM_033554	NM_033554	HLA class II histocompatibility antigen, DP alpha chain precursor (HLA-SB alpha chain) (MHC class II DP3-alpha) (DP(W3)) (DP(W4)).	chr6 33140771
NM_033554	NM_033554	HLA class II histocompatibility antigen, DP alpha chain precursor (HLA-SB alpha chain) (MHC class II DP3-alpha) (DP(W3)) (DP(W4)).	chr6_cox_hap1 4413300
NM_033554	NM_033554	HLA class II histocompatibility antigen, DP alpha chain precursor (HLA-SB alpha chain) (MHC class II DP3-alpha) (DP(W3)) (DP(W4)).	chr6_qbl_hap2 4219191
NM_052870	NM_052870	Sorting nexin-18 (Sorting nexin associated Golgi protein 1).	chr5 53849539
NM_052951	NM_052951	Terminal deoxynucleotidyltransferase interacting factor 1 (TdT interacting factor 1) (TdIF1).	chr20 43853982
NM_053056	NM_053056	G1/S-specific cyclin-D1 (PRAD1 oncogene) (BCL-1 oncogene).	chr11 69165053
NM_058222	NM_058222	Beta-tectorin precursor.	chr10 114033482
NM_079420	NM_079420	Myosin light chain 1, skeletal muscle isoform (MLC1F) (A1 catalytic) (Alkali myosin light chain 1).	chr2 210863121
NM_079420	NM_079422	Myosin light chain 3, skeletal muscle isoform (A2 catalytic) (Alkali myosin light chain 3) (MLC3F).	chr2 210863121
NM_080473	NM_080473	Transcription factor GATA-5 (GATA-binding factor 5).	chr20 60471948
NM_080596	NM_080596	OTTHUMP00000016173 (HIST1H2AI protein) (Histone H2A).	chr6 27222886
NM_080737	NM_080737	Synaptotagmin-like protein 4 (Exophilin-2) (Granuphilin).	chrX 99816146
NM_080741	BC012899	Sialidase-4 (EC 3.2.1.18) (N-acetyl-alpha-neuraminidase 4).	chr2 242400745
NM_080741	NM_080741	Sialidase-4 (EC 3.2.1.18) (N-acetyl-alpha-neuraminidase 4).	chr2 242400745
NM_138424	NM_138424	OTTHUMP00000021965.	chr9 115893739
NM_138473	NM_138473	Transcription factor Sp1.	chr12 52060245
NM_138704	NM_138704	Melanoma-associated antigen G1 (MAGE-G1 antigen) (Necdin-like protein 2) (Hepatocellular carcinoma-associated protein 4).	chr15 27347650
NM_139058	NM_139058	Homeobox protein ARX (Aristaless-related homeobox).	chrX 24932213
NM_139168	NM_139168	Splicing factor, arginine/serine-rich 12 (Serine-arginine-rich splicing regulatory protein 86) (SRrp86) (Splicing regulatory protein 508) (SRrp508).	chr5 65489710
NM_144621	NM_144621	Zinc finger and BTB domain-containing protein 8.	chr1 32703244
NM_144642	AK122831	Synaptoporin.	chr3 63404048
NM_144642	NM_144642	Synaptoporin.	chr3 63404063
NM_144665	NM_144665	Sestrin-3.	chr11 94545780
NM_144720	AK098536	Hypothetical protein FLJ25670.	chr4 6106386
NM_144720	BC047075	Hypothetical protein FLJ25670.	chr4 6106388
NM_144720	NM_144720	Hypothetical protein FLJ25670.	chr4 6106386
NM_145046	NM_145046	Calreticulin-3 precursor (Calreticulin-2).	chr19 16450887
NM_145119	AF264620	Praja 1.	chrX 68297422
NM_145119	NM_145119	Ubiquitin protein ligase Praja1 (EC 6.3.2.-) (RING finger protein 70).	chrX 68297429
NM_145214	NM_145214	Tripartite motif protein 11 (EC 6.3.2.-) (RING finger protein 92) (BIA1 protein).	chr1 226647999
NM_145657	NM_145657	Homeobox protein GSH-1.	chr13 27264779
NM_145803	NM_145803	TNF receptor-associated factor 6 (Interleukin 1 signal transducer) (RING finger protein 85).	chr11 36467298
NM_145805	NM_145805	Insulin gene enhancer protein ISL-2 (Islet-2).	chr15 74416201
NM_145914	CR749301	Hypothetical protein DKFZp686H10254.	chr7 99485357
NM_145914	NM_145914	Zinc finger protein 38 homolog (Zfp-38) (NY-REN-21 antigen) (Zinc finger and SCAN domain containing protein 21).	chr7 99485352
NM_147156	NM_147156	Phosphatidylcholine:ceramide cholinephosphotransferase 1 (EC 2.7.-.-) (Transmembrane protein 23) (Sphingomyelin synthase 1) (Mob protein).	chr10 51735351
NM_152310	NM_152310	Elongation of very long chain fatty acids protein 3 (Cold inducible glycoprotein of 30 kDa).	chr10 103976132
NM_152332	NM_152332	Membrane targeting tandem C2 domain containing protein 1 (Tandem C2 protein in nucleus) (Tac2-N).	chr14 91316278
NM_152380	AK127536	CDNA FLJ39077 fis, clone NT2RP7017795, highly similar to TBX15 PROTEIN.	chr1 119227191
NM_152380	NM_152380	T-box transcription factor TBX15 (T-box protein 15).	chr1 119227188
NM_152739	NM_152739	Homeobox protein Hox-A9 (Hox-1G).	chr7 27168582
NM_152860	NM_152860	Transcription factor Sp7 (Zinc finger protein osterix).	chr12 52006628
NM_153212	NM_153212	Gap junction beta-4 protein (Connexin-30.3) (Cx30.3).	chr1 34999364
NM_153371	NM_153371	Ligand of Numb-protein X 2 (Numb-binding protein 2) (PDZ domain- containing RING finger protein 1).	chr13 27018051
NM_153813	NM_153813	Zinc finger protein ZFPM1 (Zinc finger protein multitype 1) (Friend of GATA protein 1) (Friend of GATA-1) (FOG-1).	chr16 87047225
NM_171999	NM_171999	Sal-like protein 3 (Zinc finger protein SALL3) (hSALL3).	chr18 74841262
NM_172193	NM_172193	Kelch domain-containing protein 1.	chr14 49229634
NM_173086	NM_173086	Keratin, type II cytoskeletal 6D (Cytokeratin-6D) (CK 6D) (K6d keratin) (Fragment).	chr12 51148861
NM_173536	NM_173536	Gamma-aminobutyric-acid receptor gamma-1 subunit precursor (GABA(A) receptor).	chr4 45732544
NM_173539	NM_173539	WUGSC:H_DJ0855D21.3 protein (Fragment).	chr8 172384
NM_173557	NM_173557	RING finger protein 152.	chr18 57631582
NM_173849	NM_173849	Homeobox protein goosecoid.	chr14 94304312
NM_175709	NM_175709	Chromobox protein homolog 7.	chr22 37856733
NM_175857	NM_175857	Keratin-associated protein 8-1 (High glycine-tyrosine keratin- associated protein 8.1).	chr21 31106886
NM_175875	NM_175875	Homeobox protein SIX5 (DM locus-associated homeodomain protein).	chr19 50959883
NM_176822	NM_176822	NACHT-, LRR- and PYD-containing protein 14 (Nucleotide-binding oligomerization domain protein 5).	chr11 7016372
NM_177550	NM_177550	Hypothetical protein DKFZp686E17257 (Fragment).	chr17 6528764
NM_177963	NM_177963	Synaptotagmin-12 (Synaptotagmin XII) (SytXII).	chr11 66547466
NM_178013	AY225517	Proline-rich membrane anchor 1 precursor (PRiMA).	chr14 93257136
NM_178013	NM_178013	Proline-rich membrane anchor 1 precursor (PRiMA).	chr14 93257136
NM_181489	NM_181489	Zinc finger protein 445.	chr3 44457427
NM_181882	AF321192	Periaxin.	chr19 45591515
NM_181882	NM_181882	Periaxin.	chr19 45591515
NM_182521	NM_182521	Zinc finger SWIM domain containing protein 2.	chr2 187400451
NM_182632	NM_182632	Sodium- and chloride-dependent transporter XTRP2 (Solute carrier family 6 member 18).	chr5 1278469
NM_182795	BC068078	NPM2 protein.	chr8 21938307
NM_182795	NM_182795	Nucleoplasmin-2.	chr8 21938299
NM_182848	NM_182848	Claudin 10.	chr13 94883858
NM_182894	NM_182894	Homeobox protein CHX10 (Ceh-10 homeodomain containing homolog).	chr14 73775927
NM_182898	NM_182898	cAMP response element-binding protein 5 (CRE-BPa).	chr7 28418668
NM_182926	NM_182926	Kinectin (Kinesin receptor) (CG-1 antigen).	chr14 55116792
NM_182926	Z22551	Kinectin (Kinesin receptor) (CG-1 antigen).	chr14 55116787
NM_183244	NM_183244	OTTHUMP00000031425 (Fragment).	chr20 57729659
NM_183244	NM_183246	OTTHUMP00000031425 (Fragment).	chr20 57729659
NM_198274	NM_198274	SET and MYND domain containing protein 1.	chr2 88148496
NM_198464	NM_198464	Tryptophan/serine protease.	chr8 10420490
NM_199328	NM_199328	Claudin-8.	chr21 30508200
NM_199346	NM_199346	Profilin-4 (Profilin IV).	chr2 24191747
S73751	S73751	Liver carboxylesterase 1 precursor (EC 3.1.1.1) (Acyl coenzyme A:cholesterol acyltransferase) (ACAT) (Monocyte/macrophage serine esterase) (HMSE) (Serine esterase 1) (Brain carboxylesterase hBr1) (Triacylglycerol hydrolase) (TGH) (Egasyn).	chr16 54394428
U15637	U15637	TNF receptor-associated factor 3 (CD40 receptor associated factor 1) (CRAF1) (CD40 binding protein) (CD40BP) (LMP1 associated protein) (LAP1) (CAP-1).	chr14 102313719
U44378	U44378	Mothers against decapentaplegic homolog 4 (SMAD 4) (Mothers against DPP homolog 4) (Deletion target in pancreatic carcinoma 4) (hSMAD4).	chr18 46827286
U85962	U85962	CREB-binding protein (EC 2.3.1.48).	chr16 3717719
X91141	X91141	Rab GTPase binding effector protein 1 (Rabaptin-5) (Rabaptin-5alpha) (Rabaptin-4).	chr17 5126316
X98260	X98260	Zuotin-related factor 1 (M-phase phosphoprotein 11).	chr7 102740157
